# Supplementary material for: An Fe(iii)-catalyzed reduction radical tandem strategy to access poly-substituted β-alkenyl valerolactones
Source: Royal Society of Chemistry journal article supplement (doi:10.1039/d2qo02038f), 2023-01-01

## Supporting Information

For

### **Fe (III)-Catalyzed Reduction Radical Tandem Strategy to Access Poly-Substituted $\beta$ -Alkenyl Valerolactones**

Fu-Yu Li, Bei Wang, Hong Xu, Yao Xiao, Dong-Wei Huang, Ji-Yu Wang\*

#### Contents

|                                            |          |
|--------------------------------------------|----------|
| 1. General Information                     | S2       |
| 2. Substrate of Synthesis                  | S2-S3    |
| 3. Typical Synthesis Procedure of 3a       | S3       |
| 4. Optimization of the Reaction Conditions | S4       |
| 5. Scale-up Reaction                       | S4-S5    |
| 6. Typical Synthesis Procedure of 4a       | S5       |
| 7. Proposed Mechanism                      | S5-S6    |
| 8. Characterization of 3, 4a, 5a           | S6-S23   |
| 9. X-Ray Analysis                          | S23-S38  |
| 10. References                             | S39      |
| 11. Copies of NMR and IR Spectra           | S40-S145 |

## 1. General Information:

All template reaction experiments were carried out under atmospheric conditions. Commercially available reagents were used without further purification. Solvents were treated prior to use according to the standard methods.  $^1\text{H}$  NMR,  $^{13}\text{C}$  NMR and  $^{19}\text{F}$  NMR spectra were recorded at 300 or 400MHz on an Agilent spectrometer.  $\text{CDCl}_3$  was used as solvent. Chemical shifts were referenced relative to residual solvent. Coupling constants (J) were reported in Hertz (Hz). Thin layer chromatography was carried out in the ultraviolet light using a GF-254 silica gel plate. Melting points were measured with micro melting point apparatus. HRMS were performed on an Agilent 6210 ESI/TOF. Infrared (IR) spectra were recorded on Nicolet 380. Samples were scanned in the  $400\text{-}4000\text{ cm}^{-1}$  region with KBr pellet

## 2. Substrate synthesis:

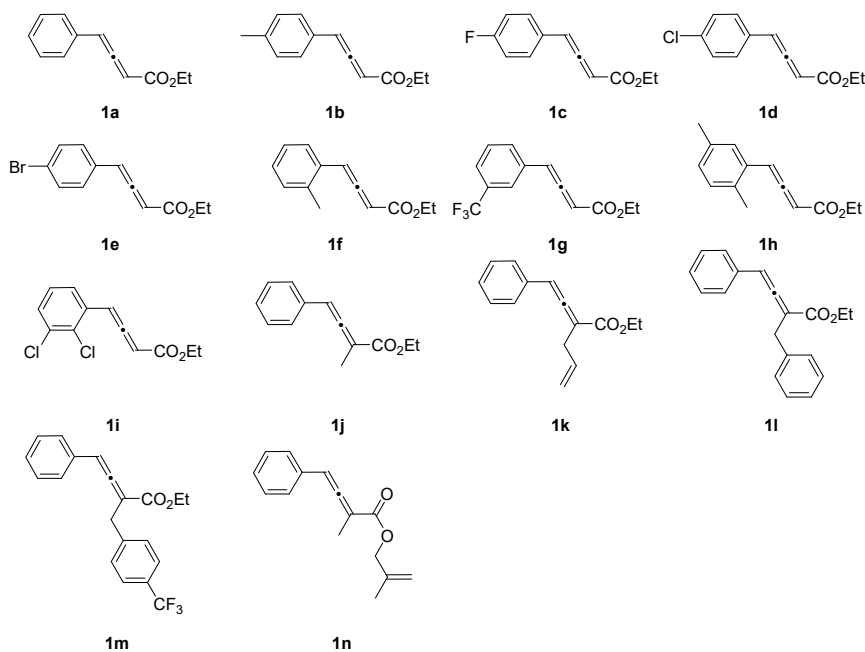

All starting materials **1a-1m** are known compounds and are prepared according to literature. <sup>[1,2]</sup>**1n** is new compound and is prepared according to literatures.<sup>[3]</sup>

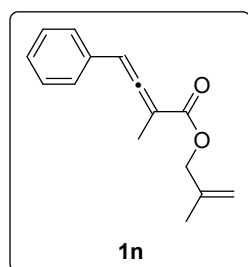

Colorless liquid, yield: 70%;  $R_f = 0.45$  (EtOAc/Petroleum ether 1:7).

**IR (KBr)** 3023, 2969, 2928, 1705, 1491, 1447, 1368, 1297, 1268, 1137, 1031, 985, 950, 906, 756, 698  $\text{cm}^{-1}$

**<sup>1</sup>H NMR (300 MHz, CDCl<sub>3</sub>):** δ 7.34 (q, *J* = 2.64, 2.11 Hz, 1H), 7.32 (d, *J* = 2.12 Hz, 2H), 7.31 – 7.24 (m, 2H), 6.51 (q, *J* = 2.94 Hz, 1H), 4.97 (dd, *J* = 1.61, 0.86 Hz, 1H), 4.89 (q, *J* = 1.33 Hz, 1H), 4.66 – 4.53 (m, 2H), 2.04 (d, *J* = 2.97 Hz, 3H), 1.75 – 1.71 (m, 3H).

**<sup>13</sup>C NMR (75 MHz, CDCl<sub>3</sub>):** δ 212.5, 166.5, 139.8, 132.3, 128.7, 127.6, 127.2, 112.3, 99.1, 97.2, 67.9, 19.3, 14.9.

**HRMS (ESI-TOF) m/z:** [M + H]<sup>+</sup> Calcd for C<sub>15</sub>H<sub>17</sub>O<sub>2</sub> 229.1228 ; found 229.1231.

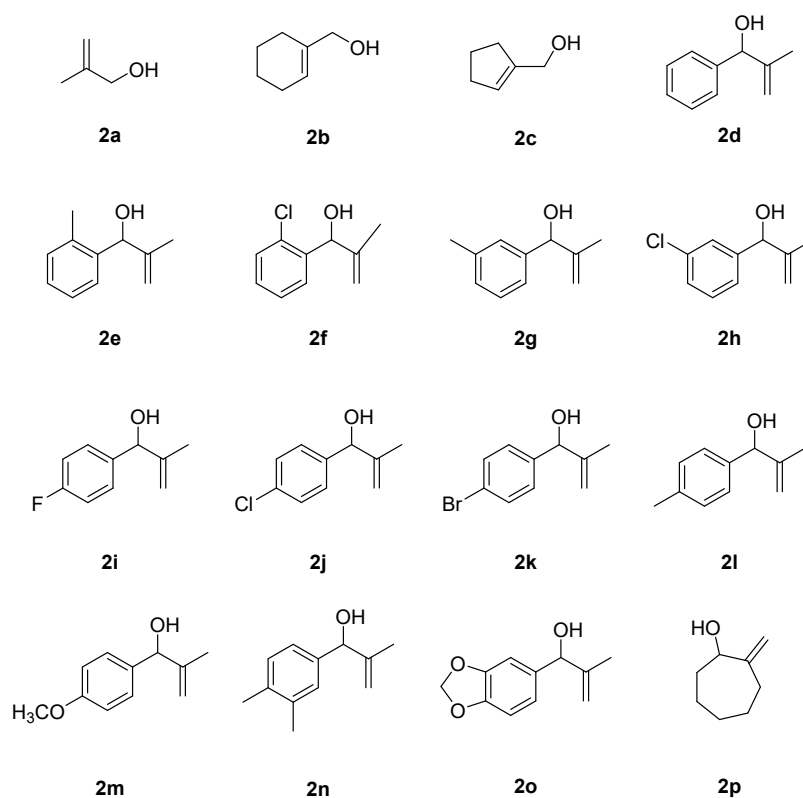

All starting materials **2a-2p** are known compounds. **2a** is commercially available. **2b-2c** are prepared according to literature.<sup>[4]</sup> **2d-2o** are prepared according to literature.<sup>[5]</sup> **2p** is prepared according to literature.<sup>[6]</sup>

### 3. Typical Procedure for Synthesis of **3a**:

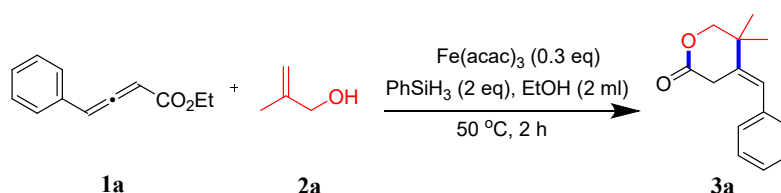

Fe(acac)<sub>3</sub> (32 mg, 0.09 mmol) and 2,3-dienoates **1a** (56.4 mg, 0.3 mmol) was added to the reaction tube and dissolved with ethanol (2 ml). Afterwards, 2-Methyl-2-propen-1-ol **2a** (64.9 mg, 0.9 mmol), and PhSiH<sub>3</sub> (64.9 mg, 0.6 mmol) were added via syringe. The solution was heated to 50°C for 2 h. After the reaction completed and quenched

with water, then ethyl acetate extracted the solution. Finally, the purification by column chromatography on silica gel using ethyl acetate/petroleum ether (v/v, 1:20) as eluent to give **3a** as a colorless liquid. (53 mg, 82% yield).

#### 4. Optimization of the Reaction Conditions.

**Table 1. Optimization of the Reaction Conditions** <sup>a, b</sup>

| entry           | catalyst                                             | reductant                        | solvent            | T(°C) | Yield(%)<br>3a |
|-----------------|------------------------------------------------------|----------------------------------|--------------------|-------|----------------|
| 1               | Fe(acac) <sub>3</sub>                                | PhSiH <sub>3</sub>               | EtOH               | 60    | 60             |
| 2               | Fe <sub>2</sub> (ox) <sub>3</sub> ·6H <sub>2</sub> O | PhSiH <sub>3</sub>               | EtOH               | 60    | 0              |
| 3               | CoCl <sub>2</sub>                                    | PhSiH <sub>3</sub>               | EtOH               | 60    | trace          |
| 4               | Cu(acac) <sub>2</sub>                                | PhSiH <sub>3</sub>               | EtOH               | 60    | trace          |
| 5               | Ni(acac) <sub>2</sub>                                | PhSiH <sub>3</sub>               | EtOH               | 60    | 0              |
| 6               | FeCl <sub>3</sub>                                    | PhSiH <sub>3</sub>               | EtOH               | 60    | 0              |
| 7               | Fe(acac) <sub>3</sub>                                | NaBH <sub>4</sub>                | EtOH               | 60    | trace          |
| 8               | Fe(acac) <sub>3</sub>                                | Et <sub>3</sub> SiH              | EtOH               | 60    | 0              |
| 9               | Fe(acac) <sub>3</sub>                                | (EtO) <sub>3</sub> SiH           | EtOH               | 60    | 30             |
| 10              | Fe(acac) <sub>3</sub>                                | Ph <sub>2</sub> SiH <sub>2</sub> | EtOH               | 60    | 60             |
| 11              | Fe(acac) <sub>3</sub>                                | PhSiH <sub>3</sub>               | MeOH               | 60    | 20             |
| 12              | Fe(acac) <sub>3</sub>                                | PhSiH <sub>3</sub>               | THF                | 60    | 0              |
| 13              | Fe(acac) <sub>3</sub>                                | PhSiH <sub>3</sub>               | CH <sub>3</sub> CN | 60    | 48             |
| 14              | Fe(acac) <sub>3</sub>                                | PhSiH <sub>3</sub>               | 1,4-Dioxane        | 60    | 35             |
| 15              | Fe(acac) <sub>3</sub>                                | PhSiH <sub>3</sub>               | EtOH               | 75    | 30             |
| 16              | Fe(acac) <sub>3</sub>                                | PhSiH <sub>3</sub>               | EtOH               | 50    | 82             |
| 17              | Fe(acac) <sub>3</sub>                                | PhSiH <sub>3</sub>               | EtOH               | 30    | 15             |
| 18 <sup>c</sup> | Fe(acac) <sub>3</sub>                                | PhSiH <sub>3</sub>               | EtOH               | 50    | 34             |
| 19 <sup>d</sup> | Fe(acac) <sub>3</sub>                                | PhSiH <sub>3</sub>               | EtOH               | 50    | 24             |

<sup>a</sup> Reaction conditions: **1a** (0.3 mmol), **2a** (0.9 mmol), catalyst (30 mol %), reductant (2 equiv), solvent (2 mL), 2h; <sup>b</sup> yield refers to isolated product. <sup>c</sup> Fe(acac)<sub>3</sub> (10 mol %) was used. <sup>d</sup> conducted the reaction in an argon atmosphere.

#### 5. Scale-up Reaction

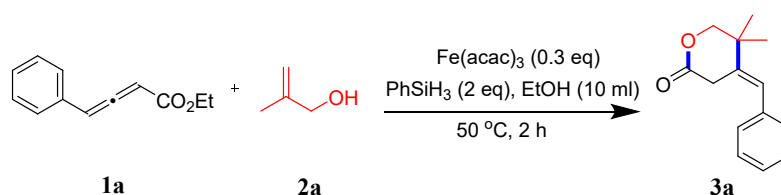

Fe(acac)<sub>3</sub> (160 mg, 0.45 mmol) and 2,3-dienoates **1a** (282 mg, 1.5 mmol) was added to the reaction tube and dissolved with ethanol (10 ml). Afterwards, 2-Methyl-2-

propen-1-ol **2a** (324.5 mg, 4.5 mmol), and  $\text{PhSiH}_3$  (324.5 mg, 3.0 mmol) were added via syringe. The solution was heated to  $50^\circ\text{C}$  for 2 h. After the reaction completed and quenched with water, then ethyl acetate extracted the solution. Finally, the purification by column chromatography on silica gel using ethyl acetate/petroleum ether (v/v, 1:20) as eluent to give **3a** as a colorless liquid. (200 mg, 62% yield).

## 6. Typical Procedure for Synthesis of **4a**.

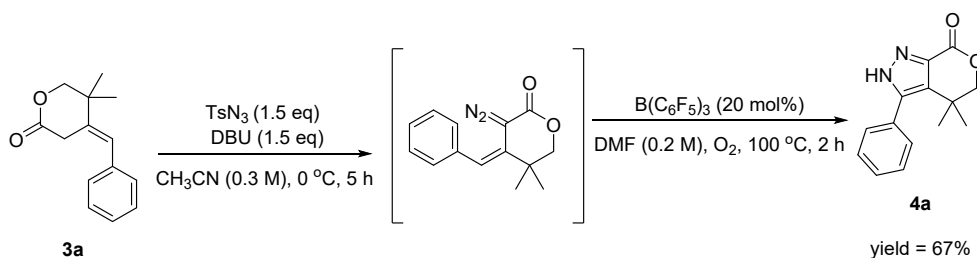

**3a** (106 mg, 0.5 mmol),  $\text{TsN}_3$  (130 mg, 1.5 eq), DBU (110 mg, 1.5 eq) are added to reaction tube under argon atmosphere, then dissolve with anhydrous acetonitrile (0.3 M). The solution was reacted for 5 hours in  $0^\circ\text{C}$ . After the reaction was completed, it was quenched with water and extracted with ethyl acetate to obtain azo ester compound intermediate, which was added to the next step without purification. Add azo ester intermediate,  $\text{B}(\text{C}_6\text{F}_5)_3$  (50 mg, 0.2 eq) to a dry reaction tube in an argon atmosphere, then dissolve with anhydrous DMF (0.2 M). The solution was reacted for 2 hours in  $100^\circ\text{C}$  in an oxygen atmosphere. After the reaction is completed, it was quenched with water and extracted with ethyl acetate. Finally, the purification by column chromatography on silica gel using ethyl acetate/petroleum ether (v/v, 1:30) as eluent to give **4a** as white solid. (81 mg, 67% yield).

## 7. Proposed Mechanism

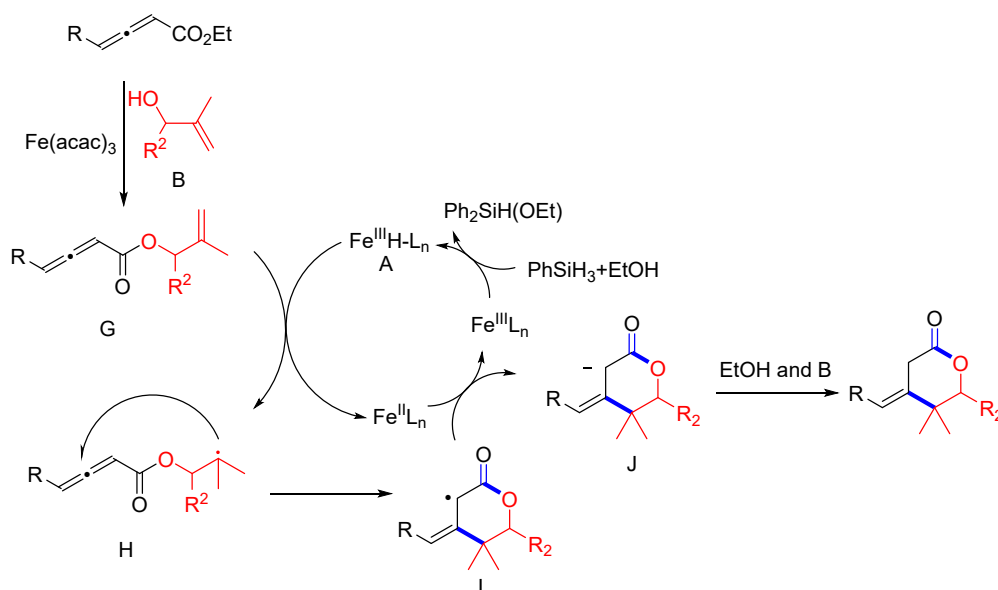

The reaction went through second path: 2,3-dienoates and allyl alcohol **B** formed allyl ester intermediate **G** under Fe (III) catalysis. Then allyl ester intermediate **G** and ferrohdyride species **A** underwent hydrogen atom transfer to form radical intermediates **H**, which underwent intramolecular Michael addition to form radicals **I**. Finally, **I** formed anionic intermediates **J** through single electron transfer and **J** abstracted the proton from the ethanol and **B** to generate product.

## 8. Characterization of 3, 4a, 5a:

### (E)-4-benzylidene-5,5-dimethyltetrahydro-2H-pyran-2-one (3a)

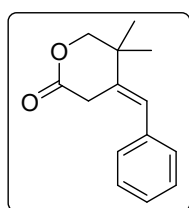

**3a**

Colorless liquid, 53 mg, yield: 82%;  $R_f = 0.26$  (EtOAc/Petroleum ether 1:7).

**IR (KBr)** 3034, 2971, 2928, 1718, 1462, 1389, 1256, 1241, 1129, 1064, 1023, 860, 802, 744, 706, 577, 492  $\text{cm}^{-1}$

**$^1\text{H}$  NMR (400 MHz,  $\text{CDCl}_3$ ):**  $\delta$  7.34 (t,  $J = 7.56$  Hz, 2H), 7.24 (d,  $J = 7.29$  Hz, 1H), 7.16 (d,  $J = 7.50$  Hz, 2H), 6.50 (d,  $J = 2.45$  Hz, 1H), 4.08 (s, 2H), 3.57 – 3.52 (m, 2H), 1.28 (s, 6H).

**$^{13}\text{C}$  NMR (101 MHz,  $\text{CDCl}_3$ ):**  $\delta$  170.6, 137.9, 136.2, 128.6, 128.4, 127.1, 125.2, 77.0, 36.4, 33.8, 25.6.

**HRMS (ESI-TOF) m/z:**  $[\text{M} + \text{H}]^+$  Calcd for  $\text{C}_{14}\text{H}_{17}\text{O}_2$  217.1228; found 217.1230.

### (E)-4-benzylidene-5,5-dimethyltetrahydro-2H-pyran-2-one-3-dc (3aD)

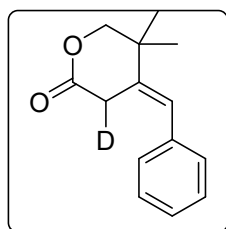

**3aD**

Colorless liquid, 13 mg, yield: 20%;  $R_f = 0.33$  (EtOAc/Petroleum ether 1:7).

**IR (KBr)** 3025, 2960, 2928, 1746, 1492, 1376, 1294, 1254, 1195, 1057, 966, 920, 859, 761, 702  $\text{cm}^{-1}$

**$^1\text{H}$  NMR (400 MHz,  $\text{CDCl}_3$ ):**  $\delta$  7.37 – 7.32 (m, 2H), 7.26 – 7.21 (m, 1H), 7.16 (d,  $J = 7.58$  Hz, 2H), 6.51 (s, 1H), 4.08 (s, 2H), 3.53 (d,  $J = 11.76$  Hz, 1H), 1.27 (s, 6H).

**$^{13}\text{C}$  NMR (101 MHz,  $\text{CDCl}_3$ ):**  $\delta$  170.6, 137.9, 136.2, 128.6, 128.4, 127.1, 125.2, 77.0, 36.4, 33.9, 25.6.

**HRMS (ESI-TOF) m/z:**  $[\text{M} + \text{H}]^+$  Calcd for  $\text{C}_{14}\text{H}_{16}\text{DO}_2$  218.1291; found 218.1281.

**(E)-5-benzylidene-2-oxaspiro[5.5]undecan-3-one (3b)**

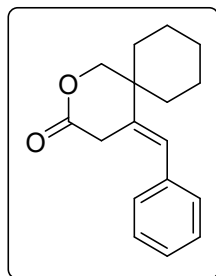

**3b**

White crystalline solid, m.p. 104-106°C, 57 mg, yield: 75%;  $R_f = 0.45$  (EtOAc/Petroleum ether 1:7).

**IR (KBr)** 3007, 2936, 2853, 1745, 1485, 1456, 1385, 1243, 1164, 1135, 1056, 914, 871, 837, 756, 729, 704, 594, 550  $\text{cm}^{-1}$

**$^1\text{H}$  NMR (300 MHz,  $\text{CDCl}_3$ ):**  $\delta$  7.35 (t,  $J = 7.35$  Hz, 2H), 7.23 (d,  $J = 6.10$  Hz, 1H), 7.15 (d,  $J = 7.30$  Hz, 2H), 6.56 (s, 1H), 4.30 (s, 2H), 3.53 (s, 2H), 1.73 (s, 4H), 1.67 (d,  $J = 9.09$  Hz, 3H), 1.46 (dt,  $J = 22.30, 10.16$  Hz, 4H).

**$^{13}\text{C}$  NMR (101 MHz,  $\text{CDCl}_3$ ):**  $\delta$  170.9, 138.5, 136.4, 128.7, 128.4, 127.0, 125.5, 72.3, 39.3, 33.8, 33.4, 25.8, 21.8.

**HRMS (ESI-TOF) m/z:**  $[\text{M} + \text{H}]^+$  Calcd for  $\text{C}_{17}\text{H}_{21}\text{O}_2$  257.1541; found 257.1546.

**(E)-10-benzylidene-7-oxaspiro[4.5]decan-8-one (3c)**

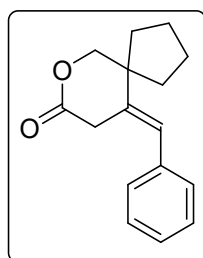

**3c**

White crystalline solid, m.p. 135-138°C, 53 mg, yield: 74%;  $R_f = 0.35$  (EtOAc/Petroleum ether 1:7).

**IR (KBr)** 3061, 2959, 2865, 1728, 1660, 1597, 1447, 1391, 1260, 1231, 1102, 1052, 889, 802, 741, 691, 610  $\text{cm}^{-1}$

**$^1\text{H}$  NMR (400 MHz,  $\text{CDCl}_3$ ):**  $\delta$  7.34 (t,  $J = 7.51$  Hz, 2H), 7.23 (d,  $J = 7.42$  Hz, 1H), 7.15 (d,  $J = 7.29$  Hz, 2H), 6.50 (s, 1H), 4.11 (s, 2H), 3.58 (d,  $J = 2.10$  Hz, 2H), 1.91 – 1.83 (m, 4H), 1.82 – 1.70 (m, 4H).

**$^{13}\text{C}$  NMR (101 MHz,  $\text{CDCl}_3$ ):**  $\delta$  170.7, 138.6, 136.3, 128.7, 128.4, 127.0, 124.5, 74.7, 48.2, 36.6, 34.8, 24.8.

**HRMS (ESI-TOF) m/z:**  $[\text{M} + \text{H}]^+$  Calcd for  $\text{C}_{16}\text{H}_{19}\text{O}_2$  243.1385; found 243.1389.

**(E)-4-benzylidene-5,5-dimethyl-6-phenyltetrahydro-2H-pyran-2-one**

**(3d)**

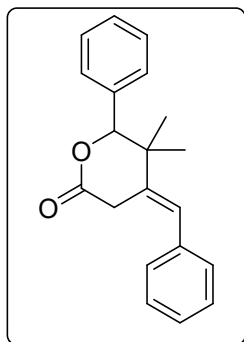

**3d**

White crystalline solid, m.p. 140-142°C, 44 mg, yield: 50%;  $R_f = 0.35$  (EtOAc/Petroleum ether 1:7).

**IR (KBr)** 3053, 3028, 2978, 1730, 1495, 1451, 1368, 1364, 1295, 1258, 1170, 1039, 1002, 929, 908, 868, 748, 691, 592  $\text{cm}^{-1}$

**$^1\text{H}$  NMR (400 MHz,  $\text{CDCl}_3$ ):**  $\delta$  7.36 (d,  $J = 6.20$  Hz, 5H), 7.30 (dd,  $J = 16.00, 7.38$  Hz, 4H), 7.19 (d,  $J = 7.42$  Hz, 2H), 6.53 (s, 1H), 5.23 (s, 1H), 3.83 – 3.62 (m, 2H), 1.23 (s, 3H), 1.10 (s, 3H).

**$^{13}\text{C}$  NMR (101 MHz,  $\text{CDCl}_3$ ):**  $\delta$  170.1, 138.0, 136.4, 135.4, 128.7, 128.5, 128.5, 128.0, 127.9, 127.1, 125.6, 87.3, 40.5, 34.0, 25.4, 22.0.

**HRMS (ESI-TOF)  $m/z$ :**  $[\text{M} + \text{Na}]^+$  Calcd for  $\text{C}_{20}\text{H}_{20}\text{O}_2\text{Na}$  315.1361; found 315.1363.

**(E)-4-benzylidene-5-(o-tolyl)tetrahydro-2H-pyran-2-one (3e)**

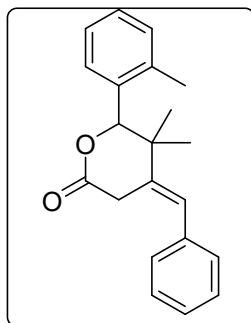

**3e**

White crystalline solid, m.p. 138-140°C, 36 mg, yield: 40%;  $R_f = 0.35$  (EtOAc/Petroleum ether 1:7).

**IR (KBr)** 3055, 3019, 2967, 1733, 1493, 1470, 1393, 1360, 1327, 1264, 1170, 1035, 1008, 925, 902, 868, 748, 694, 594, 560, 508  $\text{cm}^{-1}$

**$^1\text{H}$  NMR (300 MHz,  $\text{CDCl}_3$ ):**  $\delta$  7.40 (td,  $J = 6.71, 2.66$  Hz, 3H), 7.33 – 7.27 (m, 2H), 7.23 (dt,  $J = 8.59, 4.12$  Hz, 4H), 6.53 (s, 1H), 5.61 (s, 1H), 3.86 – 3.68 (m, 2H), 2.43 (s, 3H), 1.26 (s, 3H), 1.21 (s, 3H).

**$^{13}\text{C}$  NMR (75 MHz,  $\text{CDCl}_3$ ):**  $\delta$  170.2, 138.2, 136.3, 136.0, 133.9, 130.5, 128.7, 128.4, 128.3, 128.2, 127.1, 125.6, 125.1, 82.4, 41.4, 34.1, 25.0, 22.3, 20.3.

**HRMS (ESI-TOF)  $m/z$ :**  $[\text{M} + \text{H}]^+$  Calcd for  $\text{C}_{21}\text{H}_{23}\text{O}_2$  307.1698; found 307.1692.

**(E)-4-benzylidene-5-(2-chlorophenyl)tetrahydro-2H-pyran-2-one (3f)**



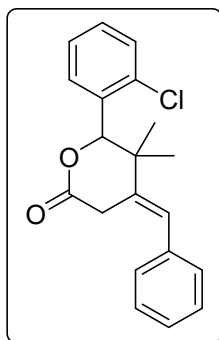

**3f**

White crystalline solid, m.p. 155-158°C, 39 mg, yield: 40%;  $R_f = 0.34$  (EtOAc/Petroleum ether 1:7).

**IR (KBr)** 3067, 3028, 2971, 2936, 2869, 1735, 1576, 1476, 1443, 1406, 1329, 1291, 1268, 1166, 1048, 1033, 1004, 923, 900, 868, 771, 746, 733, 694, 650, 598, 569, 512  $\text{cm}^{-1}$

**$^1\text{H}$  NMR (300 MHz,  $\text{CDCl}_3$ ):**  $\delta$  7.52 – 7.45 (m, 1H), 7.45 – 7.37 (m, 3H), 7.35 – 7.27 (m, 3H), 7.22 (d,  $J = 7.34$  Hz, 2H), 6.55 (s, 1H), 5.91 (s, 1H), 3.87 – 3.67 (m, 2H), 1.31 (s, 3H), 1.20 (s, 3H).

**$^{13}\text{C}$  NMR (75 MHz,  $\text{CDCl}_3$ ):**  $\delta$  169.8, 137.6, 136.2, 133.6, 133.4, 129.9, 129.6, 129.5, 128.7, 128.4, 127.1, 126.5, 125.5, 82.0, 41.5, 34.0, 24.6, 22.1.

**HRMS (ESI-TOF) m/z:**  $[\text{M} + \text{Na}]^+$  Calcd for  $\text{C}_{20}\text{H}_{21}\text{ClO}_2$  349.0971; found 349.0968.

**(E)-4-benzylidene-5,5-dimethyl-6-(m-tolyl)tetrahydro-2H-pyran-2-one (3g)**

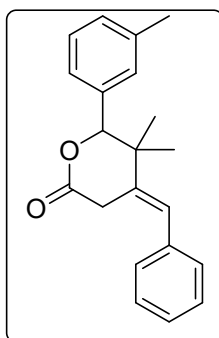

**3g**

White crystalline solid, m.p. 143-146°C, 53 mg, yield: 58%;  $R_f = 0.36$  (EtOAc/Petroleum ether 1:7).

**IR (KBr)** 3053, 3028, 2965, 2919, 1737, 1597, 1451, 1406, 1333, 1260, 1172, 1029, 1004, 925, 871, 794, 741, 691, 589, 502  $\text{cm}^{-1}$

**$^1\text{H}$  NMR (300 MHz,  $\text{CDCl}_3$ ):**  $\delta$  7.37 (t,  $J = 7.38$  Hz, 2H), 7.30 – 7.27 (m, 1H), 7.24 (s, 1H), 7.22 – 7.15 (m, 3H), 7.15 – 7.07 (m, 2H), 6.53 (s, 1H), 5.20 (s, 1H), 3.78 (dd,  $J = 19.53, 1.10$  Hz, 1H), 3.64 (dd,  $J = 19.04, 2.68$  Hz, 1H), 2.38 (s, 3H), 1.23 (s, 3H), 1.10 (s, 3H).

**$^{13}\text{C}$  NMR (101 MHz,  $\text{CDCl}_3$ ):**  $\delta$  170.1, 138.1, 137.5, 136.4, 135.3, 129.2, 128.7, 128.7,

128.4, 127.7, 127.1, 125.5, 125.2, 87.4, 87.4, 40.5, 34.0, 25.5, 22.1, 21.5.

**HRMS (ESI-TOF) m/z:**  $[M + H]^+$  Calcd for  $C_{21}H_{23}O_2$  307.1698; found 307.1697.

**(E)-4-benzylidene-6-(3-chlorophenyl)-5,5-dimethyltetrahydro-2H-pyran-2-one (3h)**

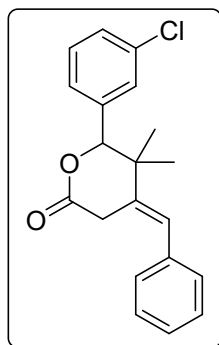

**3h**

White crystalline solid, m.p. 157-160°C, 48 mg, yield: 50%;  $R_f = 0.32$  (EtOAc/Petroleum ether 1:7).

**IR (KBr)** 3065, 3028, 2976, 2965, 1739, 1595, 1574, 1431, 1366, 1322, 1260, 1177, 1033, 918, 808, 771, 750, 696, 508  $cm^{-1}$

**$^1H$  NMR (300 MHz,  $CDCl_3$ ):**  $\delta$  7.41 – 7.34 (m, 4H), 7.33 – 7.25 (m, 3H), 7.23 – 7.16 (m, 3H), 6.55 (s, 1H), 5.20 (s, 1H), 3.84 – 3.72 (m, 1H), 3.64 (dd,  $J = 19.30, 2.55$  Hz, 1H), 1.24 (s, 3H), 1.10 (s, 3H).

**$^{13}C$  NMR (101 MHz,  $CDCl_3$ ):**  $\delta$  169.6, 137.5, 137.4, 136.2, 134.0, 129.2, 128.7, 128.7, 128.5, 128.2, 127.2, 126.2, 125.9, 86.5, 86.4, 40.5, 33.9, 25.3, 21.9.

**HRMS (ESI-TOF) m/z:**  $[M + H]^+$  Calcd for  $C_{20}H_{21}ClO_2$  327.1151 ; found 327.1154.

**(E)-4-benzylidene-6-(4-fluorophenyl)-5,5-dimethyltetrahydro-2H-pyran-2-one (3i)**

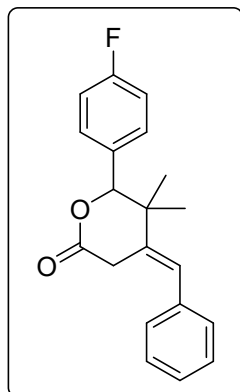

**3i**

White crystalline solid, m.p. 127-130°C, 55 mg, yield: 60%;  $R_f = 0.24$  (EtOAc/Petroleum ether 1:7).

**IR (KBr)** 3055, 2976, 2930, 1737, 1608, 1510, 1418, 1289, 1247, 1156, 1027, 904,

835, 777, 604, 508  $\text{cm}^{-1}$

**$^1\text{H}$  NMR (400 MHz,  $\text{CDCl}_3$ ):**  $\delta$  7.37 (t,  $J = 7.48$  Hz, 2H), 7.28 (td,  $J = 7.65, 6.63, 4.42$  Hz, 3H), 7.18 (d,  $J = 7.43$  Hz, 2H), 7.07 (t,  $J = 8.61$  Hz, 2H), 6.53 (s, 1H), 5.22 (s, 1H), 3.82 – 3.71 (m, 1H), 3.64 (dd,  $J = 19.26, 2.46$  Hz, 1H), 1.21 (s, 3H), 1.08 (s, 3H).

**$^{13}\text{C}$  NMR (101 MHz,  $\text{CDCl}_3$ ):**  $\delta$  169.8, 137.7, 136.3, 131.3, 129.8, 129.7, 128.7, 128.5, 127.2, 125.7, 115.0, 114.8, 86.6, 40.5, 33.9, 25.3, 21.9.

**$^{19}\text{F}$  NMR (376 MHz,  $\text{CDCl}_3$ ):**  $\delta$  -113.30.

**HRMS (ESI-TOF)  $m/z$ :**  $[\text{M} + \text{H}]^+$  Calcd for  $\text{C}_{20}\text{H}_{21}\text{FO}_2$  311.1447 ; found 311.1449.

### **(E)-4-benzylidene-6-(4-chlorophenyl)-5,5-dimethyltetrahydro-2H-**

### **pyran-2-one (3j)**

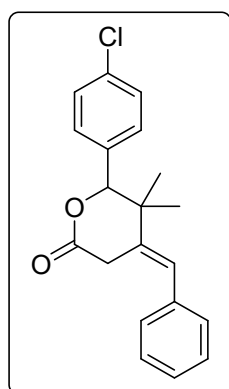

**3j**

White crystalline solid, m.p. 145-148°C, 63 mg, yield: 65%;  $R_f = 0.24$  (EtOAc/Petroleum ether 1:7).

**IR (KBr)** 3053, 3028, 2976, 2921, 1741, 1599, 1495, 1410, 1283, 1250, 1160, 1089, 1033, 1008, 906, 833, 771, 702  $\text{cm}^{-1}$

**$^1\text{H}$  NMR (300 MHz,  $\text{CDCl}_3$ ):**  $\delta$  7.34 (d,  $J = 8.13$  Hz, 4H), 7.24 (t,  $J = 9.05$  Hz, 3H), 7.16 (d,  $J = 7.57$  Hz, 2H), 6.51 (s, 1H), 5.19 (s, 1H), 3.75 (d,  $J = 19.30$  Hz, 1H), 3.62 (dd,  $J = 19.28, 2.09$  Hz, 1H), 1.19 (s, 3H), 1.05 (s, 3H).

**$^{13}\text{C}$  NMR (101 MHz,  $\text{CDCl}_3$ ):**  $\delta$  169.7, 137.6, 136.2, 134.4, 134.0, 129.3, 128.7, 128.5, 128.1, 127.2, 125.8, 86.5, 40.5, 33.9, 25.3, 21.9.

**HRMS (ESI-TOF)  $m/z$ :**  $[\text{M} + \text{H}]^+$  Calcd for  $\text{C}_{20}\text{H}_{21}\text{ClO}_2$  327.1151 ; found 327.1156.

### **(E)-4-benzylidene-6-(4-bromophenyl)-5,5-dimethyltetrahydro-2H-**

### **pyran-2-one (3k)**

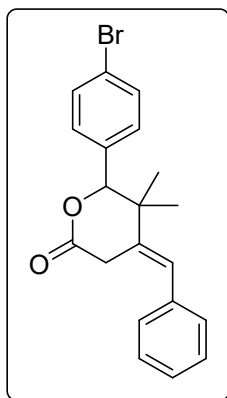

**3k**

White crystalline solid, m.p. 154-157°C, 66 mg, yield: 60%;  $R_f = 0.32$  (EtOAc/Petroleum ether 1:7).

**IR (KBr)** 3051, 3023, 2971, 2932, 1730, 1597, 1489, 1410, 1289, 1243, 1168, 1073, 1033, 1008, 906, 827, 775, 706, 550, 481  $\text{cm}^{-1}$

**$^1\text{H}$  NMR (300 MHz,  $\text{CDCl}_3$ ):**  $\delta$  7.52 (d,  $J = 8.47$  Hz, 2H), 7.37 (t,  $J = 7.27$  Hz, 2H), 7.29 (d,  $J = 7.33$  Hz, 1H), 7.23 – 7.14 (m, 4H), 6.54 (s, 1H), 5.20 (s, 1H), 3.78 (dd,  $J = 19.22, 1.46$  Hz, 1H), 3.64 (dd,  $J = 19.25, 2.50$  Hz, 1H), 1.21 (s, 3H), 1.07 (s, 3H).

**$^{13}\text{C}$  NMR (101 MHz,  $\text{CDCl}_3$ ):**  $\delta$  169.7, 137.5, 136.2, 134.5, 131.1, 129.7, 128.7, 128.5, 127.2, 125.8, 122.6, 86.5, 40.4, 33.9, 25.3, 21.9.

**HRMS (ESI-TOF) m/z:**  $[\text{M} + \text{H}]^+$  Calcd for  $\text{C}_{20}\text{H}_{21}\text{BrO}_2$  371.0646; found 371.0649.

**(E)-4-benzylidene-5,5-dimethyl-6-(p-tolyl)tetrahydro-2H-pyran-2-one**

**(3l)**

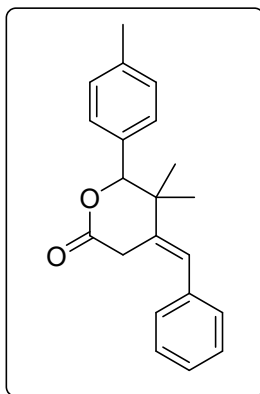

**3l**

White crystalline solid, m.p. 140-142°C, 71 mg, yield: 78%;  $R_f = 0.35$  (EtOAc/Petroleum ether 1:7).

**IR (KBr)** 3030, 2974, 2924, 2878, 1728, 1520, 1470, 1358, 1293, 1264, 1172, 1035, 1008, 906, 835, 762, 737, 700, 600, 510  $\text{cm}^{-1}$

**$^1\text{H}$  NMR (400 MHz,  $\text{CDCl}_3$ ):**  $\delta$  7.37 (t,  $J = 7.47$  Hz, 2H), 7.29 – 7.20 (m, 2H), 7.22 – 7.08 (m, 6H), 6.52 (t,  $J = 2.12$  Hz, 1H), 5.20 (s, 1H), 3.77 (dd,  $J = 19.25, 1.46$  Hz, 1H), 3.64 (dd,  $J = 19.26, 2.61$  Hz, 1H), 2.37 (s, 3H), 1.22 (s, 3H), 1.09 (s, 3H).

**$^{13}\text{C}$  NMR (101 MHz,  $\text{CDCl}_3$ ):**  $\delta$  170.1, 138.3, 138.1, 136.4, 132.5, 128.7, 128.5, 128.4,

127.9, 127.1, 125.5, 87.3, 87.3, 40.5, 34.0, 25.5, 22.0, 21.2.

**HRMS (ESI-TOF) m/z:**  $[M + H]^+$  Calcd for  $C_{21}H_{23}O_2$  307.1698 ; found 307.1693.

**(E)-4-benzylidene-6-(4-methoxyphenyl)-5,5-dimethyltetrahydro-2H-pyran-2-one (3m)**

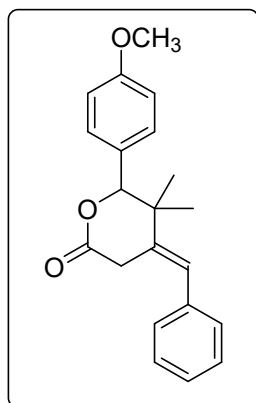

**3m**

White crystalline solid, m.p. 104-106°C, 67 mg, yield: 70%;  $R_f = 0.29$  (EtOAc/Petroleum ether 1:7).

**IR (KBr)** 3048, 2959, 2838, 1741, 1616, 1552, 1308, 1256, 1179, 1035, 993, 831, 764, 698, 594  $cm^{-1}$

**$^1H$  NMR (400 MHz,  $CDCl_3$ ):**  $\delta$  7.37 (t,  $J = 7.46$  Hz, 2H), 7.31 – 7.21 (m, 4H), 7.18 (d,  $J = 7.24$  Hz, 2H), 6.90 (d,  $J = 8.68$  Hz, 2H), 6.52 (s, 1H), 5.19 (s, 1H), 3.83 (s, 3H), 3.79 – 3.72 (m, 1H), 3.64 (dd,  $J = 19.26, 2.40$  Hz, 1H), 1.21 (s, 3H), 1.09 (s, 3H).

**$^{13}C$  NMR (101 MHz,  $CDCl_3$ ):**  $\delta$  170.1, 159.7, 138.1, 136.4, 129.2, 128.7, 128.4, 127.6, 127.1, 125.5, 113.3, 87.1, 87.1, 55.3, 40.6, 34.0, 25.5, 22.0.

**HRMS (ESI-TOF) m/z:**  $[M + H]^+$  Calcd for  $C_{21}H_{22}O_3$  323.1647 ,found 323.1646.

**(E)-4-benzylidene-6-(3,4-dimethylphenyl)-5,5-dimethyltetrahydro-2H-pyran-2-one (3n)**

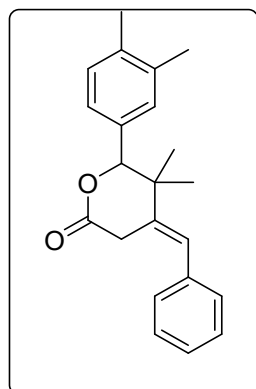

**3n**

White crystalline solid, m.p. 145-148°C, 76 mg, yield: 80%;  $R_f = 0.37$

(EtOAc/Petroleum ether 1:7).

**IR (KBr)** 3026, 2971, 2921, 1737, 1639, 1443, 1354, 1262, 1170, 1039, 1002, 918, 827, 739, 694, 510  $\text{cm}^{-1}$

**$^1\text{H}$  NMR (400 MHz,  $\text{CDCl}_3$ ):**  $\delta$  7.36 (t,  $J = 7.50$  Hz, 2H), 7.28 (s, 1H), 7.22 – 7.15 (m, 2H), 7.15 – 7.06 (m, 2H), 7.02 (dd,  $J = 7.59, 1.60$  Hz, 1H), 6.52 (s, 1H), 5.17 (s, 1H), 3.76 (dd,  $J = 19.26, 1.47$  Hz, 1H), 3.63 (dd,  $J = 19.21, 2.63$  Hz, 1H), 2.27 (s, 6H), 1.22 (s, 3H), 1.09 (s, 3H).

**$^{13}\text{C}$  NMR (101 MHz,  $\text{CDCl}_3$ ):**  $\delta$  170.2, 138.2, 136.9, 136.5, 136.1, 132.8, 129.2, 129.0, 128.7, 128.4, 127.1, 125.5, 125.4, 87.4, 40.5, 34.0, 25.5, 22.1, 19.8, 19.5.

**HRMS (ESI-TOF)  $m/z$ :**  $[\text{M} + \text{H}]^+$  Calcd for  $\text{C}_{22}\text{H}_{25}\text{O}_2$  321.1854, found 321.1855.

**(E)-6-(benzo[d][1,3]dioxol-5-yl)-4-benzylidene-5,5-dimethyltetrahydro-2H-pyran-2-one (3o)**

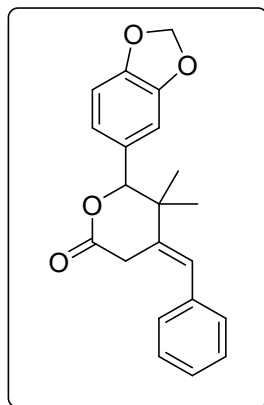

**3o**

White crystalline solid, m.p. 103-105°C, 65 mg, yield: 65%;  $R_f = 0.28$  (EtOAc/Petroleum ether 1:7).

**IR (KBr)** 3053, 2976, 2909, 1728, 1497, 1439, 1254, 1204, 1162, 1102, 1039, 1010, 937, 831, 769, 696  $\text{cm}^{-1}$

**$^1\text{H}$  NMR (400 MHz,  $\text{CDCl}_3$ ):**  $\delta$  7.36 (t,  $J = 7.48$  Hz, 2H), 7.26 (d,  $J = 14.65$  Hz, 2H), 7.18 (d,  $J = 7.32$  Hz, 2H), 6.85 – 6.82 (m, 1H), 6.82 – 6.73 (m, 2H), 6.53 (t,  $J = 2.10$  Hz, 1H), 5.99 (s, 2H), 5.14 (s, 1H), 3.75 (dd,  $J = 19.26, 1.38$  Hz, 1H), 3.62 (dd,  $J = 19.30, 2.41$  Hz, 1H), 1.21 (s, 3H), 1.11 (s, 3H).

**$^{13}\text{C}$  NMR (101 MHz,  $\text{CDCl}_3$ ):**  $\delta$  169.9, 147.7, 147.4, 138.0, 129.2, 128.7, 128.5, 127.1, 125.5, 121.8, 108.5, 107.6, 101.2, 87.1, 87.1, 40.6, 33.9, 25.5, 22.0.

**HRMS (ESI-TOF)  $m/z$ :**  $[\text{M} + \text{H}]^+$  Calcd for  $\text{C}_{21}\text{H}_{21}\text{O}_4$  337.1440, found 337.1438.

**(E)-4-benzylidene-4a-methyloctahydrocyclohepta[b]pyran-2(3H)-one (3p)**

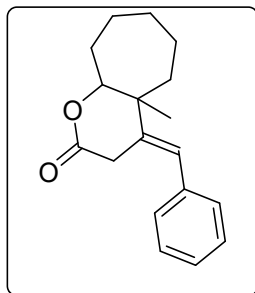

**3p**

White crystalline solid, m.p. 150-152°C, 34 mg, yield: 34%;  $R_f = 0.35$  (EtOAc/Petroleum ether 1:7).

**IR (KBr)** 3073, 2973, 2934, 2876, 1742, 1651, 1598, 1507, 1485, 1411, 1383, 1301, 1220, 1161, 1046, 1103, 942, 878, 820, 780, 743  $\text{cm}^{-1}$

**$^1\text{H}$  NMR (400 MHz,  $\text{CDCl}_3$ ):**  $\delta$  7.34 (t,  $J = 7.48$  Hz, 2H), 7.25 (s, 1H), 7.15 (d,  $J = 7.38$  Hz, 2H), 6.50 (s, 1H), 4.31 – 4.23 (m, 1H), 3.72 – 3.52 (m, 1H), 3.46 (dd,  $J = 18.57, 2.06$  Hz, 1H), 2.02 – 1.88 (m, 3H), 1.86 – 1.67 (m, 3H), 1.59 (dd,  $J = 25.70, 13.10$  Hz, 4H), 1.15 (s, 3H).

**$^{13}\text{C}$  NMR (101 MHz,  $\text{CDCl}_3$ ):**  $\delta$  171.2, 170.8,  $\delta$  139.9, 138.8, 136.6, 136.6, 128.7, 128.7, 128.5, 128.4, 126.9, 126.5, 125.8, 124.4, 86.3, 85.2, 43.1, 42.7, 37.3, 37.1, 34.2, 33.8, 30.2, 28.6, 28.1, 27.5, 26.8, 24.0, 23.1, 22.1, 22.0, 20.4.

**HRMS (ESI-TOF) m/z:**  $[\text{M} + \text{H}]^+$  Calcd for  $\text{C}_{18}\text{H}_{23}\text{O}_2$  271.1698, found 271.1697.

**(E)-5,5-dimethyl-4-(4-methylbenzylidene)tetrahydro-2H-pyran-2-one**

**(3q)**

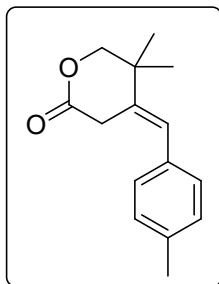

**3q**

White crystalline solid, m.p. 85-89°C, 48 mg, yield: 70%;  $R_f = 0.27$  (EtOAc/Petroleum ether 1:7).

**IR (KBr)** 3023, 2971, 2936, 1724, 1601, 1520, 1468, 1377, 1295, 1245, 1179, 1114, 1060, 1018, 887, 864, 831, 777, 752, 552  $\text{cm}^{-1}$

**$^1\text{H}$  NMR (400 MHz,  $\text{CDCl}_3$ ):**  $\delta$  7.15 (d,  $J = 7.70$  Hz, 2H), 7.05 (d,  $J = 7.75$  Hz, 2H), 6.46 (s, 1H), 4.07 (s, 2H), 3.54 (d,  $J = 2.21$  Hz, 2H), 2.34 (s, 3H), 1.26 (s, 6H).

**$^{13}\text{C}$  NMR (101 MHz,  $\text{CDCl}_3$ ):**  $\delta$  170.7, 137.1, 136.8, 133.3, 129.1, 128.6, 125.1, 125.1, 77.0, 36.3, 33.9, 33.9, 25.5, 21.1.

**HRMS (ESI-TOF) m/z:**  $[\text{M} + \text{H}]^+$  Calcd for  $\text{C}_{15}\text{H}_{19}\text{O}_2$  231.1385; found 231.1387.

**(E)-4-(4-fluorobenzylidene)-5,5-dimethyltetrahydro-2H-pyran-2-one**

**(3r)**

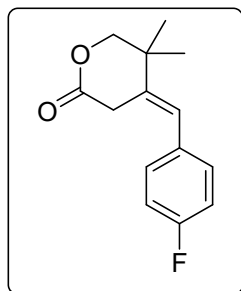

**3r**

Colorless liquid, 47 mg, yield: 68%;  $R_f = 0.26$  (EtOAc/Petroleum ether 1:7).

**IR (KBr)** 3058, 3026, 2936, 2854, 1742, 1594, 1498, 1448, 1381, 1259, 1155, 1020, 868, 748, 702  $\text{cm}^{-1}$

**$^1\text{H}$  NMR (400 MHz,  $\text{CDCl}_3$ ):**  $\delta$  7.17 – 7.06 (m, 2H), 7.03 (t,  $J = 8.60$  Hz, 2H), 6.45 (s, 1H), 4.07 (s, 2H), 3.50 – 3.48 (m, 2H), 1.26 (s, 6H).

**$^{13}\text{C}$  NMR (101 MHz,  $\text{CDCl}_3$ ):**  $\delta$  170.4, 160.5, 138.1, 132.1, 130.3, 130.2, 124.2, 115.5, 115.3, 76.9, 36.4, 33.8, 25.6.

**$^{19}\text{F}$  NMR (376 MHz,  $\text{CDCl}_3$ ):**  $\delta$  -114.71.

**HRMS (ESI-TOF)  $m/z$ :**  $[\text{M} + \text{H}]^+$  Calcd for  $\text{C}_{14}\text{H}_{16}\text{FO}_2$  235.1134; found 235.1131.

**(E)-4-(4-chlorobenzylidene)-5,5-dimethyltetrahydro-2H-pyran-2-one**

**(3s)**

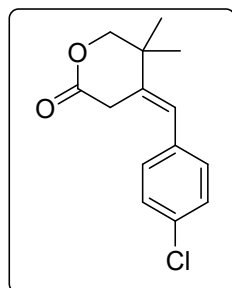

**3s**

White crystalline solid, m.p. 95-98°C, 45 mg, yield: 60%;  $R_f = 0.25$  (EtOAc/Petroleum ether 1:7).

**IR (KBr)** 3073, 2967, 2884, 1745, 1485, 1404, 1377, 1306, 1239, 1156, 1093, 1050, 1014, 879, 816, 748, 604, 519  $\text{cm}^{-1}$

**$^1\text{H}$  NMR (400 MHz,  $\text{CDCl}_3$ ):**  $\delta$  7.30 (d,  $J = 8.22$  Hz, 2H), 7.08 (d,  $J = 8.22$  Hz, 2H), 6.43 (s, 1H), 4.07 (s, 2H), 3.49 (s, 2H), 1.26 (s, 6H).

**$^{13}\text{C}$  NMR (101 MHz,  $\text{CDCl}_3$ ):**  $\delta$  170.3, 138.8, 134.6, 132.9, 130.0, 128.6, 124.1, 76.9, 36.5, 33.8, 25.5.

**HRMS (ESI-TOF)  $m/z$ :**  $[\text{M} + \text{H}]^+$  Calcd for  $\text{C}_{14}\text{H}_{16}\text{ClO}_2$  251.0838; found 251.0835.

**(E)-4-(4-bromobenzylidene)-5,5-dimethyltetrahydro-2H-pyran-2-one**



**(3t)**

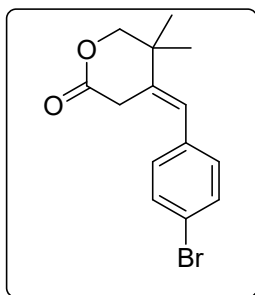

**3t**

White crystalline solid, m.p. 110-114°C, 55 mg, yield: 63%;  $R_f = 0.28$  (EtOAc/Petroleum ether 1:7).

**IR (KBr)** 3071, 2969, 2932, 2894, 1718, 1597, 1493, 1470, 1387, 1291, 1243, 1137, 1068, 1010, 860, 821, 769, 702, 498  $\text{cm}^{-1}$

**$^1\text{H}$  NMR (400 MHz,  $\text{CDCl}_3$ ):**  $\delta$  7.47 (d,  $J = 8.27$  Hz, 2H), 7.02 (d,  $J = 8.13$  Hz, 2H), 6.42 (s, 1H), 4.08 (s, 2H), 3.49 (s, 2H), 1.27 (s, 6H).

**$^{13}\text{C}$  NMR (101 MHz,  $\text{CDCl}_3$ ):**  $\delta$  170.2, 138.9, 135.1, 131.6, 130.3, 124.2, 121.0, 76.8, 36.5, 33.8, 25.5.

**HRMS (ESI-TOF) m/z:**  $[\text{M} + \text{H}]^+$  Calcd for  $\text{C}_{20}\text{H}_{21}\text{BrO}_2$  295.0333 ; found 295.0339.

**(E)-5,5-dimethyl-4-(2-methylbenzylidene)tetrahydro-2H-pyran-2-one**

**(3u)**

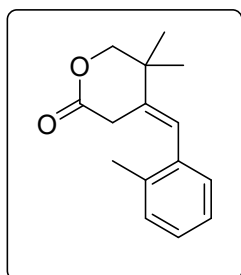

**3u**

Colorless liquid, 34 mg, yield: 50%;  $R_f = 0.22$  (EtOAc/Petroleum ether 1:7).

**IR (KBr)** 3063, 3021, 2965, 2930, 1747, 1462, 1372, 1272, 1231, 1154, 1058, 850, 754, 737, 554, 452  $\text{cm}^{-1}$

**$^1\text{H}$  NMR (400 MHz,  $\text{CDCl}_3$ ):**  $\delta$  7.16 (d,  $J = 6.30$  Hz, 3H), 7.03 – 6.95 (m, 1H), 6.50 (s, 1H), 4.08 (s, 2H), 3.34 – 3.31 (m, 2H), 2.20 (s, 3H), 1.30 (s, 6H).

**$^{13}\text{C}$  NMR (101 MHz,  $\text{CDCl}_3$ ):**  $\delta$  170.9, 138.1, 136.2, 135.2, 130.1, 128.7, 127.4, 125.7, 124.8, 77.0, 36.3, 33.6, 25.8, 19.7.

**HRMS (ESI-TOF) m/z:**  $[\text{M} + \text{Na}]^+$  Calcd for  $\text{C}_{15}\text{H}_{18}\text{O}_2\text{Na}$  253.1204; found 253.1208.

**(E)-5,5-dimethyl-4-(3-(trifluoromethyl)benzylidene)tetrahydro-2H-pyran-2-one (3v)**

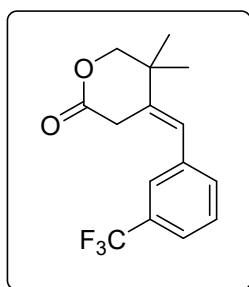

**3v**

Colorless liquid, 42 mg, yield: 50%;  $R_f = 0.18$  (EtOAc/Petroleum ether 1:7).

**IR (KBr)** 3061, 3019, 2969, 2926, 1758, 1462, 1379, 1272, 1235, 1150, 1110, 1045, 946, 848, 756, 735, 562, 446  $\text{cm}^{-1}$

**$^1\text{H}$  NMR (400 MHz,  $\text{CDCl}_3$ ):**  $\delta$  7.48 (dt,  $J = 15.34, 7.72$  Hz, 2H), 7.39 (s, 1H), 7.34 (d,  $J = 7.38$  Hz, 1H), 6.52 (s, 1H), 4.09 (s, 2H), 3.52 – 3.48 (m, 2H), 1.29 (s, 6H).

**$^{13}\text{C}$  NMR (101 MHz,  $\text{CDCl}_3$ ):**  $\delta$  170.1, 140.0, 136.9, 131.8, 131.8, 128.9, 125.4, 125.4, 124.0, 123.9, 123.8, 123.8, 76.8, 36.5, 33.8, 25.5

**$^{19}\text{F}$  NMR (376 MHz,  $\text{CDCl}_3$ ):**  $\delta$  -62.74.

**HRMS (ESI-TOF)  $m/z$ :**  $[\text{M} + \text{H}]^+$  Calcd for  $\text{C}_{15}\text{H}_{16}\text{F}_3\text{O}_2$  285.1102; found 285.1102.

**(E)-4-(2,5-dimethylbenzylidene)-5,5-dimethyltetrahydro-2H-pyran-2-one (3w)**

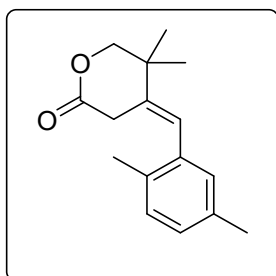

**3w**

Colorless liquid, 29 mg, yield: 40%;  $R_f = 0.23$  (EtOAc/Petroleum ether 1:7).

**IR (KBr)** 3013, 2974, 2926, 1718, 1479, 1383, 1283, 1241, 1056, 943, 864, 810, 769, 677, 592, 496  $\text{cm}^{-1}$

**$^1\text{H}$  NMR (300 MHz,  $\text{CDCl}_3$ ):**  $\delta$  7.07 (d,  $J = 7.68$  Hz, 1H), 6.98 (d,  $J = 7.78$  Hz, 1H), 6.82 (s, 1H), 6.48 (s, 1H), 4.08 (s, 2H), 3.35 – 3.33 (m, 2H), 2.30 (s, 3H), 2.15 (s, 3H), 1.29 (s, 6H).

**$^{13}\text{C}$  NMR (101 MHz,  $\text{CDCl}_3$ ):**  $\delta$  170.9, 137.8, 135.0, 132.9, 129.9, 129.2, 128.0, 124.8, 77.0, 36.2, 33.6, 25.7, 20.9, 19.1.

**HRMS (ESI-TOF)  $m/z$ :**  $[\text{M} + \text{Na}]^+$  Calcd for  $\text{C}_{16}\text{H}_{20}\text{O}_2\text{Na}$  267.1361; found 267.1367.

**(E)-4-(2,3-dichlorobenzylidene)-5,5-dimethyltetrahydro-2H-pyran-2-one (3x)**

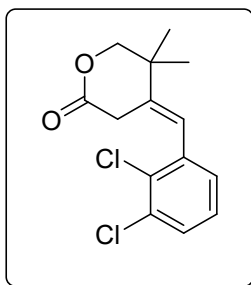

**3x**

Colorless liquid, 56 mg, yield: 66%;  $R_f = 0.20$  (EtOAc/Petroleum ether 1:7).

**IR (KBr)** 3076, 2969, 2934, 2884, 1716, 1476, 1418, 1381, 1237, 1133, 1064, 939, 860, 789, 746, 704, 498  $\text{cm}^{-1}$

**$^1\text{H}$  NMR (400 MHz,  $\text{CDCl}_3$ ):**  $\delta$  7.39 (d,  $J = 8.05$  Hz, 1H), 7.18 (t,  $J = 7.85$  Hz, 1H), 7.03 (d,  $J = 7.60$  Hz, 1H), 6.52 (s, 1H), 4.09 (s, 2H), 3.34 (s, 2H), 1.31 (s, 6H).

**$^{13}\text{C}$  NMR (101 MHz,  $\text{CDCl}_3$ ):**  $\delta$  170.2, 140.5, 136.7, 133.5, 132.0, 129.4, 129.4, 128.3, 127.0, 123.0, 76.8, 36.6, 33.7, 25.5.

**HRMS (ESI-TOF)  $m/z$ :**  $[\text{M} + \text{H}]^+$  Calcd for  $\text{C}_{14}\text{H}_{15}\text{Cl}_2\text{O}_2$  285.0449; found 285.0452.

**(E)-4-benzylidene-3,5,5-trimethyltetrahydro-2H-pyran-2-one (3y)**

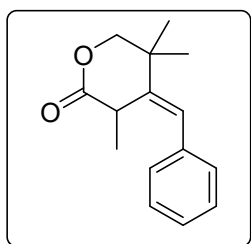

**3y**

Colorless liquid, 30 mg, yield: 44%;  $R_f = 0.32$  (EtOAc/Petroleum ether 1:7).

**IR (KBr)** 3053, 2976, 2934, 2886, 1701, 1474, 1379, 1295, 1250, 1147, 1039, 989, 921, 846, 733, 689, 577, 490  $\text{cm}^{-1}$

**$^1\text{H}$  NMR (300 MHz,  $\text{CDCl}_3$ ):**  $\delta$  7.34 (t,  $J = 7.49$  Hz, 2H), 7.25 (d,  $J = 7.28$  Hz, 1H), 7.19 (d,  $J = 7.41$  Hz, 2H), 6.49 (s, 1H), 4.29 (d,  $J = 11.26$  Hz, 1H), 3.99 (d,  $J = 11.26$  Hz, 1H), 3.86 (q,  $J = 6.82$  Hz, 1H), 1.38 (d,  $J = 7.63$  Hz, 3H), 1.27 (s, 6H).

**$^{13}\text{C}$  NMR (101 MHz,  $\text{CDCl}_3$ ):**  $\delta$  174.1, 144.2, 136.4, 128.6, 128.2, 127.1, 125.5, 76.1, 38.0, 36.3, 27.4, 25.3, 19.1.

**HRMS (ESI-TOF)  $m/z$ :**  $[\text{M} + \text{H}]^+$  Calcd for  $\text{C}_{15}\text{H}_{19}\text{O}_2$  231.1385; found 231.1385.

**(E)-3-benzyl-4-benzylidene-5,5-dimethyltetrahydro-2H-pyran-2-one (3z)**

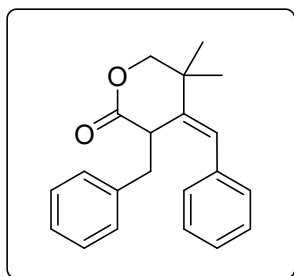

**3z**

White crystalline solid, m.p. 100-102°C, 45 mg, yield: 50%;  $R_f = 0.33$  (EtOAc/Petroleum ether 1:7).

**IR (KBr)** 3065, 3028, 2967, 2930, 1739, 1606, 1491, 1454, 1374, 1252, 1145, 1064, 1031, 960, 921, 754, 702, 567, 500  $\text{cm}^{-1}$

**$^1\text{H}$  NMR (400 MHz,  $\text{CDCl}_3$ ):**  $\delta$  7.35 (t,  $J = 7.38$  Hz, 2H), 7.26 (d,  $J = 14.65$  Hz, 2H), 7.23 – 7.16 (m, 5H), 6.93 (dd,  $J = 6.59, 2.77$  Hz, 2H), 6.61 (s, 1H), 4.27 – 4.16 (m, 1H), 3.78 – 3.70 (m, 2H), 2.92 (dd,  $J = 6.74, 2.04$  Hz, 2H), 1.26 (s, 3H), 1.18 (s, 3H).

**$^{13}\text{C}$  NMR (101 MHz,  $\text{CDCl}_3$ ):**  $\delta$  172.4, 142.7, 137.2, 136.7, 129.2, 128.7, 128.4, 128.2, 127.1, 127.0, 126.4, 75.3, 45.6, 38.5, 36.0, 28.8, 24.5.

**HRMS (ESI-TOF) m/z:**  $[\text{M} + \text{H}]^+$  Calcd for  $\text{C}_{21}\text{H}_{23}\text{O}_2$  307.1698; found 307.1700.

**(E)-4-benzylidene-5,5-dimethyl-3-(4-(trifluoromethyl)benzyl)tetrahydro-2H-pyran-2-one (3aa)**

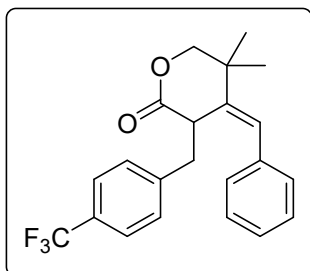

**3aa**

White crystalline solid, m.p. 110-112°C, 37 mg, yield: 33%;  $R_f = 0.36$  (EtOAc/Petroleum ether 1:7).

**IR (KBr)** 3019, 2976, 2928, 2874, 1735, 1620, 1422, 1322, 1287, 1170, 1127, 1068, 1043, 1018, 835, 769, 700, 635, 502  $\text{cm}^{-1}$

**$^1\text{H}$  NMR (300 MHz,  $\text{CDCl}_3$ ):**  $\delta$  7.39 (d,  $J = 8.04$  Hz, 2H), 7.36 – 7.26 (m, 3H), 7.10 (d,  $J = 6.97$  Hz, 2H), 6.94 (d,  $J = 8.03$  Hz, 2H), 6.62 (s, 1H), 4.27 – 4.18 (m, 1H), 4.03 (d,  $J = 11.44$  Hz, 1H), 3.91 (d,  $J = 11.38$  Hz, 1H), 2.95 (dd,  $J = 7.00, 3.50$  Hz, 2H), 1.29 (s, 3H), 1.23 (s, 3H).

**$^{13}\text{C}$  NMR (101 MHz,  $\text{CDCl}_3$ ):**  $\delta$  172.0, 142.1, 141.3, 136.4, 129.4, 128.8, 128.1, 127.2, 127.0, 125.2, 125.2, 75.7, 45.1, 38.4, 36.1, 28.5, 24.7.

**$^{19}\text{F}$  NMR (376 MHz,  $\text{CDCl}_3$ ):** -62.53.

**HRMS (ESI-TOF) m/z:**  $[\text{M} + \text{H}]^+$  Calcd for  $\text{C}_{22}\text{H}_{22}\text{BF}_3\text{O}_2$  375.15719; found 375.1570.

**(E)-3-allyl-4-benzylidene-5,5-dimethyltetrahydro-2H-pyran-2-one**

### (3ab)

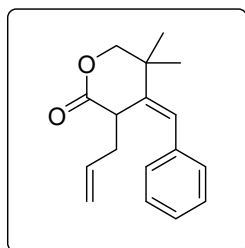

**3ab**

Colorless liquid, 38 mg, yield: 50%;  $R_f = 0.32$  (EtOAc/Petroleum ether 1:7).

**IR (KBr)** 3073, 3055, 2980, 2928, 1724, 1599, 1443, 1368, 1291, 1135, 998, 918, 858, 741, 696, 639, 492  $\text{cm}^{-1}$

**$^1\text{H}$  NMR (300 MHz,  $\text{CDCl}_3$ ):**  $\delta$  7.34 (t,  $J = 7.44$  Hz, 2H), 7.24 (d,  $J = 7.44$  Hz, 1H), 7.19 (d,  $J = 7.59$  Hz, 2H), 6.56 (s, 1H), 5.67 (td,  $J = 17.16, 7.44$  Hz, 1H), 5.04 – 4.95 (m, 2H), 4.39 – 4.33 (m, 1H), 3.95 (d,  $J = 11.42$  Hz, 1H), 3.93 – 3.87 (m, 1H), 2.45 (dt,  $J = 14.03, 6.47$  Hz, 2H), 1.30 (s, 3H), 1.27 (s, 3H).

**$^{13}\text{C}$  NMR (101 MHz,  $\text{CDCl}_3$ ):**  $\delta$  172.2, 142.9, 136.4, 133.8, 128.6, 128.3, 127.1, 126.4, 117.8, 75.7, 44.1, 37.3, 36.2, 28.6, 25.2.

**HRMS (ESI-TOF)  $m/z$ :**  $[\text{M} + \text{H}]^+$  Calcd for  $\text{C}_{17}\text{H}_{21}\text{O}_2$  257.1541 ; found 257.1541.

### (E)-4-benzylidene-6-(4-methoxyphenyl)-3,5,5-trimethyltetrahydro-

### 2H-pyran-2-one (3ac)

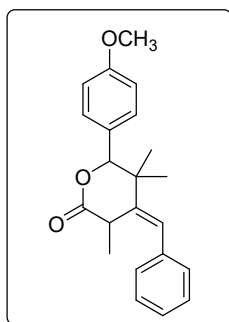

**3ac**

White crystalline solid, m.p. 145-148  $^{\circ}\text{C}$ , 55 mg, yield:55%;  $R_f = 0.25$  (EtOAc/Petroleum ether 1:7).

**IR (KBr)** 3061, 3001, 2974, 2934, 2901, 2884, 1726, 1610, 1512, 1464, 1387, 1362, 1324, 1272, 1239, 1177, 1120, 1056, 1033, 889, 837, 748, 691, 552  $\text{cm}^{-1}$

**$^1\text{H}$  NMR (400 MHz,  $\text{CDCl}_3$ ):**  $\delta$  7.36 (t,  $J = 7.47$  Hz, 2H), 7.27 (d,  $J = 11.38$  Hz, 2H), 7.24 – 7.20 (m, 3H), 6.90 (d,  $J = 8.62$  Hz, 2H), 6.50 (s, 1H), 5.35 (s, 1H), 3.98 (q,  $J = 7.41$  Hz, 1H), 3.83 (s, 3H), 1.48 (d,  $J = 7.62$  Hz, 3H), 1.26 (s, 3H), 1.07 (s, 3H).

**$^{13}\text{C}$  NMR (101 MHz,  $\text{CDCl}_3$ ):**  $\delta$  174.0, 144.1, 136.8, 129.2, 128.6, 128.2, 127.8, 127.1, 126.2, 113.2, 85.8, 55.3, 40.9, 38.2, 26.2, 23.6, 19.8.

**HRMS (ESI-TOF)  $m/z$ :**  $[\text{M} + \text{H}]^+$  Calcd for  $\text{C}_{22}\text{H}_{25}\text{O}_3$  337.1803; found 337.1800.

**(E)-4-benzylidene-6-(4-chlorophenyl)-3,5,5-trimethyltetrahydro-2H-pyran-2-one (3ad)**

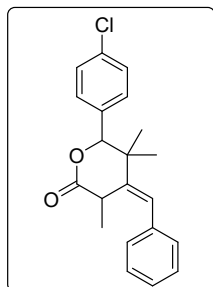

**3ad**

White crystalline solid, m.p. 152-156°C, 51 mg, yield: 50%;  $R_f = 0.24$  (EtOAc/Petroleum ether 1:7).

**IR (KBr)** 3057, 3028, 2974, 2934, 2878, 1739, 1599, 1491, 1385, 1281, 1260, 1093, 1054, 1012, 846, 766, 698, 637, 548, 506, 456  $\text{cm}^{-1}$

**$^1\text{H}$  NMR (300 MHz,  $\text{CDCl}_3$ ):**  $\delta$  7.37 (d,  $J = 6.40$  Hz, 2H), 7.35 (s, 2H), 7.28 (s, 3H), 7.20 (d,  $J = 7.49$  Hz, 2H), 6.52 (s, 1H), 5.37 (s, 1H), 3.98 (q,  $J = 7.50$  Hz, 1H), 1.48 (d,  $J = 7.61$  Hz, 3H), 1.27 (s, 3H), 1.05 (s, 3H).

**$^{13}\text{C}$  NMR (101 MHz,  $\text{CDCl}_3$ ):**  $\delta$  173.6, 143.7, 136.6, 134.4, 134.2, 129.4, 128.7, 128.2, 128.1, 127.2, 126.6, 85.3, 40.7, 38.2, 26.2, 23.5, 19.8

**HRMS (ESI-TOF) m/z:**  $[\text{M} + \text{H}]^+$  Calcd for  $\text{C}_{21}\text{H}_{22}\text{ClO}_2$  341.1308; found 341.1303.

**4,4-dimethyl-3-phenyl-4,5-dihydropyrano[3,4-c]pyrazol-7(2H)-one**

**(4a)**

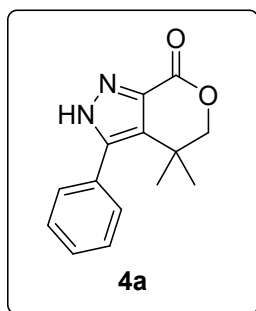

White crystalline solid, m.p. 83-85°C, 81 mg, yield: 67%;  $R_f = 0.20$  (EtOAc/Petroleum ether 1:7).

**IR (KBr)** 3282, 3061, 2980, 2936, 2876, 1735, 1489, 1462, 1441, 1370, 1283, 1250, 1137, 1056, 1014, 971, 769, 719, 696, 552  $\text{cm}^{-1}$

**$^1\text{H}$  NMR (300 MHz,  $\text{CDCl}_3$ ):**  $\delta$  7.55 – 7.38 (m, 5H), 4.14 (s, 2H), 1.29 (s, 6H).

**$^{13}\text{C}$  NMR (101 MHz,  $\text{CDCl}_3$ ):**  $\delta$  160.4, 130.5, 129.2, 129.1, 128.6, 128.1, 80.3, 32.1, 24.6.

**HRMS (ESI-TOF) m/z:**  $[\text{M} + \text{H}]^+$  Calcd for  $\text{C}_{14}\text{H}_{15}\text{N}_2\text{O}_2$  243.1133; found 243.1132.

**ethyl 3-benzylidene-5-((tert-butyldimethylsilyl)oxy)-4,4-dimethyl-**

## pentanoate (5a)

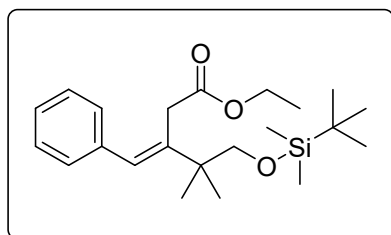

**5a**

Colorless liquid, 90 mg, yield: 80%;  $R_f = 0.45$  (EtOAc/Petroleum ether 1:15).

**IR (KBr)** 3061, 2963, 2938, 2863, 1730, 1470, 1370, 1250, 1154, 1077, 1020, 837, 775, 702, 662, 575  $\text{cm}^{-1}$

**$^1\text{H}$  NMR (300 MHz,  $\text{CDCl}_3$ ):**  $\delta$  7.31 (d,  $J = 7.50$  Hz, 1H), 7.26 (dd,  $J = 7.89, 4.21$  Hz, 3H), 7.20 (t,  $J = 6.83$  Hz, 1H), 6.67 (s, 1H), 4.12 (q,  $J = 7.13$  Hz, 2H), 3.47 (s, 2H), 3.23 (s, 2H), 1.24 (t,  $J = 7.13$  Hz, 3H), 1.13 (s, 6H), 0.90 (s, 9H), 0.03 (s, 6H).

**$^{13}\text{C}$  NMR (101 MHz,  $\text{CDCl}_3$ ):**  $\delta$  172.7, 140.4, 138.5, 129.2, 128.5, 128.1, 126.4, 71.3, 60.5, 41.8, 35.0, 25.9, 24.2, 18.2, 14.1, -5.5.

**HRMS (ESI-TOF)  $m/z$ :**  $[\text{M} + \text{H}]^+$  Calcd for  $\text{C}_{22}\text{H}_{37}\text{O}_3\text{Si}$  377.2512; found 377.2504

## 9. X-Ray Analysis

### 9.1 X-Ray Analysis for 3b

Single crystals of  $\text{C}_{17}\text{H}_{20}\text{O}_2$  **3b** were grown from ethyl acetate and PE. A suitable crystal was selected and collected on a SuperNova, Dual, Cu at zero, AtlasS2 diffractometer. The crystal was kept at 149.99(10) K during data collection. The data were collected and processed using CrysAlisPro. The structures were solved by direct methods using Olex2 software with the SHELXT structure solution program via intrinsic phasing algorithm, and the non-hydrogen atoms were located from the trial structure and then refined anisotropically with SHELXL-2018 using a full-matrix least squares procedure based on  $F^2$ . The weighted  $R$  factor,  $wR$  and goodness-of-fit  $S$  values were obtained based on  $F^2$ . The hydrogen atom positions were fixed geometrically at the calculated distances and allowed to ride on their parent atoms.

Crystallographic data for the structure reported in this paper have been deposited at the Cambridge Crystallographic Data Center and allocated with the deposition numbers: CCDC 2167329 for compounds **3b**

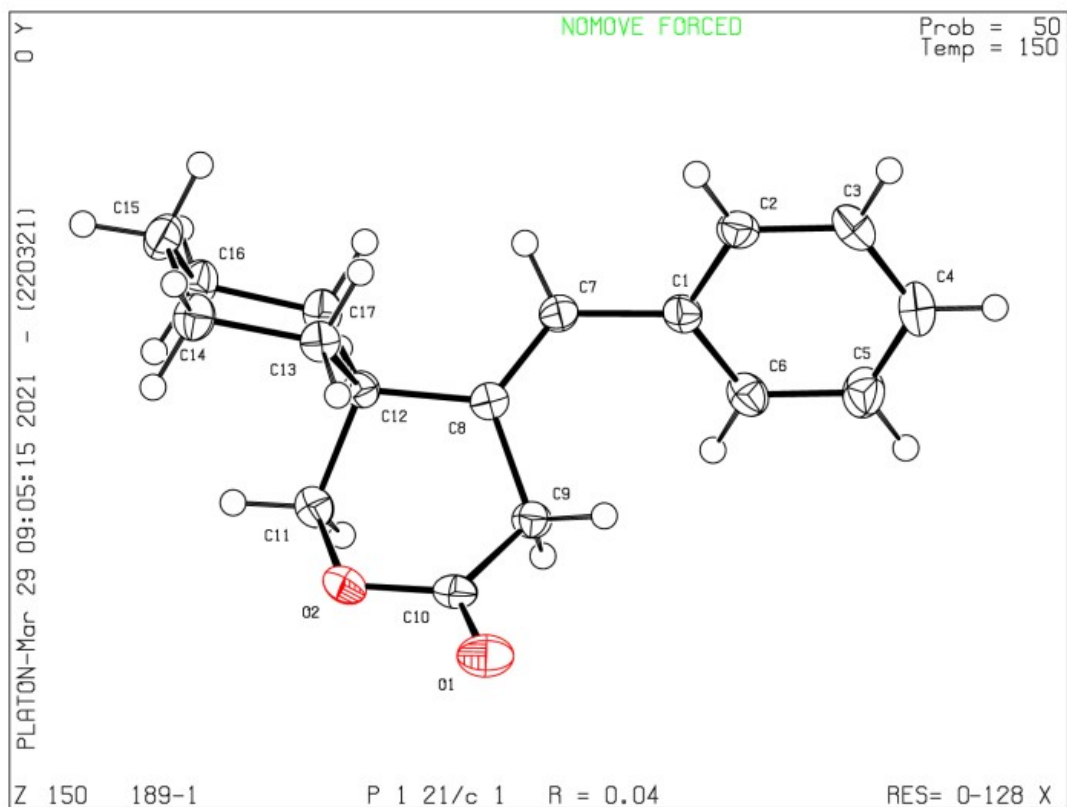

Figure S1. ORTEP Drawing of **3b** (The ellipsoids are shown at 50% probability levels)

**Table 1 Crystal data and structure refinement for 3b.**

|                                    |                                                |
|------------------------------------|------------------------------------------------|
| Identification code                | 3b                                             |
| Empirical formula                  | C <sub>17</sub> H <sub>20</sub> O <sub>2</sub> |
| Formula weight                     | 256.33                                         |
| Temperature/K                      | 149.99(10)                                     |
| Crystal system                     | monoclinic                                     |
| Space group                        | P2 <sub>1</sub> /c                             |
| a/Å                                | 10.8532(7)                                     |
| b/Å                                | 15.9018(9)                                     |
| c/Å                                | 8.3007(5)                                      |
| α/°                                | 90                                             |
| β/°                                | 108.936(7)                                     |
| γ/°                                | 90                                             |
| Volume/Å <sup>3</sup>              | 1355.05(16)                                    |
| Z                                  | 4                                              |
| ρ <sub>calc</sub> /cm <sup>3</sup> | 1.256                                          |
| μ/mm <sup>-1</sup>                 | 0.081                                          |
| F(000)                             | 552.0                                          |
| Crystal size/mm <sup>3</sup>       | 0.14 × 0.13 × 0.12                             |



|                                                  |                                                               |
|--------------------------------------------------|---------------------------------------------------------------|
| Radiation                                        | Mo K $\alpha$ ( $\lambda = 0.71073$ )                         |
| 2 $\Theta$ range for data collection/ $^{\circ}$ | 3.968 to 49.998                                               |
| Index ranges                                     | $-12 \leq h \leq 12, -18 \leq k \leq 18, -9 \leq l \leq 6$    |
| Reflections collected                            | 5432                                                          |
| Independent reflections                          | 2378 [ $R_{\text{int}} = 0.0212, R_{\text{sigma}} = 0.0313$ ] |
| Data/restraints/parameters                       | 2378/0/172                                                    |
| Goodness-of-fit on $F^2$                         | 1.079                                                         |
| Final R indexes [ $I \geq 2\sigma(I)$ ]          | $R_1 = 0.0409, wR_2 = 0.0923$                                 |
| Final R indexes [all data]                       | $R_1 = 0.0491, wR_2 = 0.0977$                                 |
| Largest diff. peak/hole / e $\text{\AA}^{-3}$    | 0.17/-0.26                                                    |

**Table 2 Fractional Atomic Coordinates ( $\times 10^4$ ) and Equivalent Isotropic Displacement Parameters ( $\text{\AA}^2 \times 10^3$ ) for 3b.  $U_{\text{eq}}$  is defined as 1/3 of the trace of the orthogonalised  $U_{ij}$  tensor.**

| Atom | x          | y          | z           | U(eq)   |
|------|------------|------------|-------------|---------|
| O1   | 5663.4(11) | 3548.7(7)  | 2328.5(14)  | 36.5(3) |
| O2   | 7212.4(10) | 3594.4(7)  | 4811.9(13)  | 28.7(3) |
| C1   | 2843.6(14) | 3510.1(9)  | 6158.8(17)  | 21.4(3) |
| C2   | 1846.1(14) | 4074.3(10) | 6105.8(18)  | 25.0(3) |
| C3   | 554.2(14)  | 3853.9(10) | 5366(2)     | 28.7(4) |
| C4   | 222.9(15)  | 3068.5(10) | 4653(2)     | 32.5(4) |
| C5   | 1197.6(15) | 2499.6(10) | 4701(2)     | 32.7(4) |
| C6   | 2493.3(14) | 2712.3(9)  | 5460.9(19)  | 26.3(4) |
| C7   | 4212.4(13) | 3770.3(9)  | 6960.4(18)  | 21.7(3) |
| C8   | 5218.2(13) | 3623.4(8)  | 6411.1(17)  | 19.0(3) |
| C9   | 5065.4(14) | 3160.5(9)  | 4764.9(18)  | 22.3(3) |
| C10  | 5966.3(15) | 3454.3(9)  | 3847.2(19)  | 24.3(3) |
| C11  | 7513.2(14) | 3460.3(10) | 6625.4(19)  | 25.5(4) |
| C12  | 6592.4(13) | 3948.3(9)  | 7335.6(17)  | 19.4(3) |
| C13  | 6650.9(14) | 4901.3(9)  | 7004.3(18)  | 22.3(3) |
| C14  | 7952.4(15) | 5302.0(9)  | 7994.1(19)  | 26.8(4) |
| C15  | 8266.9(15) | 5143.2(10) | 9893.9(19)  | 29.0(4) |
| C16  | 8288.6(15) | 4208.3(10) | 10282.7(19) | 27.5(4) |
| C17  | 7007.2(14) | 3787.7(9)  | 9267.8(18)  | 24.0(3) |

**Table 3 Anisotropic Displacement Parameters ( $\text{\AA}^2 \times 10^3$ ) for 3b. The Anisotropic displacement factor exponent takes the form:  $-2\pi^2[h^2a^*2U_{11}+2hka^*b^*U_{12}+\dots]$ .**

| Atom | $U_{11}$ | $U_{22}$ | $U_{33}$ | $U_{23}$ | $U_{13}$ | $U_{12}$ |
|------|----------|----------|----------|----------|----------|----------|
| O1   | 47.2(7)  | 43.8(7)  | 23.1(6)  | 0.5(5)   | 17.9(5)  | 1.6(6)   |
| O2   | 26.1(6)  | 36.7(6)  | 28.3(6)  | -3.3(5)  | 15.7(5)  | -0.6(5)  |
| C1   | 22.3(8)  | 26.3(8)  | 17.5(7)  | 2.4(6)   | 8.9(6)   | -1.2(6)  |

**Table 3 Anisotropic Displacement Parameters ( $\text{\AA}^2 \times 10^3$ ) for 3b. The Anisotropic displacement factor exponent takes the form:  $-2\pi^2[h^2a^{*2}U_{11}+2hka^*b^*U_{12}+\dots]$ .**

| Atom | $U_{11}$ | $U_{22}$ | $U_{33}$ | $U_{23}$ | $U_{13}$ | $U_{12}$ |
|------|----------|----------|----------|----------|----------|----------|
| C2   | 26.9(8)  | 26.0(8)  | 25.0(8)  | -2.5(6)  | 12.4(6)  | -1.0(7)  |
| C3   | 21.8(8)  | 33.5(9)  | 33.3(9)  | 5.5(7)   | 12.5(7)  | 5.4(7)   |
| C4   | 19.9(8)  | 37.4(10) | 37.1(9)  | 2.7(8)   | 5.1(7)   | -3.7(7)  |
| C5   | 29.2(9)  | 26.7(9)  | 40.7(10) | -2.1(7)  | 9.4(7)   | -5.4(7)  |
| C6   | 23.6(8)  | 24.0(8)  | 32.7(9)  | 2.1(7)   | 11.2(7)  | 2.2(7)   |
| C7   | 22.6(8)  | 24.8(8)  | 18.0(7)  | -0.9(6)  | 6.8(6)   | -0.6(6)  |
| C8   | 21.8(8)  | 17.2(7)  | 17.7(7)  | 2.9(6)   | 6.2(6)   | 1.1(6)   |
| C9   | 22.3(8)  | 24.2(8)  | 20.7(7)  | -0.9(6)  | 7.7(6)   | 1.2(6)   |
| C10  | 28.2(8)  | 22.2(8)  | 25.2(8)  | -3.4(6)  | 12.5(7)  | 2.9(7)   |
| C11  | 20.9(8)  | 28.8(8)  | 26.7(8)  | -1.2(7)  | 7.5(6)   | 1.3(7)   |
| C12  | 19.1(7)  | 20.2(7)  | 19.3(7)  | 1.3(6)   | 6.8(6)   | -0.2(6)  |
| C13  | 23.3(8)  | 22.1(8)  | 21.0(7)  | 2.8(6)   | 6.6(6)   | 0.6(6)   |
| C14  | 28.0(8)  | 21.1(8)  | 30.2(9)  | 2.5(6)   | 8.2(7)   | -3.0(7)  |
| C15  | 26.6(8)  | 31.2(9)  | 25.7(8)  | -4.7(7)  | 3.8(7)   | -5.5(7)  |
| C16  | 27.6(8)  | 31.0(9)  | 20.6(8)  | 3.2(7)   | 3.1(6)   | -3.8(7)  |
| C17  | 23.3(8)  | 25.9(8)  | 22.1(8)  | 5.2(6)   | 6.2(6)   | -2.5(7)  |

**Table 4 Bond Lengths for 3b.**

| Atom | Atom | Length/ $\text{\AA}$ | Atom | Atom | Length/ $\text{\AA}$ |
|------|------|----------------------|------|------|----------------------|
| O1   | C10  | 1.2045(18)           | C8   | C9   | 1.5131(19)           |
| O2   | C10  | 1.3479(18)           | C8   | C12  | 1.5289(19)           |
| O2   | C11  | 1.4488(18)           | C9   | C10  | 1.496(2)             |
| C1   | C2   | 1.396(2)             | C11  | C12  | 1.527(2)             |
| C1   | C6   | 1.395(2)             | C12  | C13  | 1.5451(19)           |
| C1   | C7   | 1.476(2)             | C12  | C17  | 1.5400(19)           |
| C2   | C3   | 1.381(2)             | C13  | C14  | 1.524(2)             |
| C3   | C4   | 1.379(2)             | C14  | C15  | 1.522(2)             |
| C4   | C5   | 1.383(2)             | C15  | C16  | 1.520(2)             |
| C5   | C6   | 1.383(2)             | C16  | C17  | 1.527(2)             |
| C7   | C8   | 1.333(2)             |      |      |                      |

**Table 5 Bond Angles for 3b.**

| Atom | Atom | Atom | Angle/ $^\circ$ | Atom | Atom | Atom | Angle/ $^\circ$ |
|------|------|------|-----------------|------|------|------|-----------------|
| C10  | O2   | C11  | 115.93(11)      | O1   | C10  | C9   | 124.77(14)      |
| C2   | C1   | C7   | 119.40(13)      | O2   | C10  | C9   | 116.40(12)      |
| C6   | C1   | C2   | 117.86(13)      | O2   | C11  | C12  | 111.80(11)      |
| C6   | C1   | C7   | 122.73(13)      | C8   | C12  | C13  | 109.38(11)      |
| C3   | C2   | C1   | 121.08(14)      | C8   | C12  | C17  | 112.00(11)      |

**Table 5 Bond Angles for 3b.**

| Atom | Atom | Atom | Angle/°    | Atom | Atom | Atom | Angle/°    |
|------|------|------|------------|------|------|------|------------|
| C4   | C3   | C2   | 120.42(15) | C11  | C12  | C8   | 106.77(11) |
| C3   | C4   | C5   | 119.33(14) | C11  | C12  | C13  | 111.10(12) |
| C4   | C5   | C6   | 120.54(15) | C11  | C12  | C17  | 108.12(12) |
| C5   | C6   | C1   | 120.75(14) | C17  | C12  | C13  | 109.45(11) |
| C8   | C7   | C1   | 127.79(13) | C14  | C13  | C12  | 113.48(11) |
| C7   | C8   | C9   | 122.16(13) | C15  | C14  | C13  | 110.24(12) |
| C7   | C8   | C12  | 122.88(13) | C16  | C15  | C14  | 111.41(12) |
| C9   | C8   | C12  | 114.89(12) | C15  | C16  | C17  | 111.27(12) |
| C10  | C9   | C8   | 114.19(12) | C16  | C17  | C12  | 114.09(12) |
| O1   | C10  | O2   | 118.80(14) |      |      |      |            |

**Table 6 Torsion Angles for 3b.**

| A  | B   | C   | D   | Angle/°     | A   | B   | C   | D   | Angle/°     |
|----|-----|-----|-----|-------------|-----|-----|-----|-----|-------------|
| O2 | C11 | C12 | C8  | 60.84(15)   | C8  | C9  | C10 | O1  | -138.78(15) |
| O2 | C11 | C12 | C13 | -58.35(15)  | C8  | C9  | C10 | O2  | 43.38(18)   |
| O2 | C11 | C12 | C17 | -178.48(11) | C8  | C12 | C13 | C14 | 175.14(12)  |
| C1 | C2  | C3  | C4  | -0.3(2)     | C8  | C12 | C17 | C16 | -171.77(12) |
| C1 | C7  | C8  | C9  | 1.7(2)      | C9  | C8  | C12 | C11 | -18.47(16)  |
| C1 | C7  | C8  | C12 | 178.29(13)  | C9  | C8  | C12 | C13 | 101.84(14)  |
| C2 | C1  | C6  | C5  | 1.7(2)      | C9  | C8  | C12 | C17 | -136.64(12) |
| C2 | C1  | C7  | C8  | -138.28(16) | C10 | O2  | C11 | C12 | -52.76(16)  |
| C2 | C3  | C4  | C5  | 0.6(2)      | C11 | O2  | C10 | O1  | -179.34(13) |
| C3 | C4  | C5  | C6  | 0.3(2)      | C11 | O2  | C10 | C9  | -1.36(18)   |
| C4 | C5  | C6  | C1  | -1.5(2)     | C11 | C12 | C13 | C14 | -67.24(15)  |
| C6 | C1  | C2  | C3  | -0.9(2)     | C11 | C12 | C17 | C16 | 70.86(16)   |
| C6 | C1  | C7  | C8  | 42.6(2)     | C12 | C8  | C9  | C10 | -30.26(17)  |
| C7 | C1  | C2  | C3  | 179.96(13)  | C12 | C13 | C14 | C15 | -56.37(17)  |
| C7 | C1  | C6  | C5  | -179.10(14) | C13 | C12 | C17 | C16 | -50.29(16)  |
| C7 | C8  | C9  | C10 | 146.56(14)  | C13 | C14 | C15 | C16 | 57.21(17)   |
| C7 | C8  | C12 | C11 | 164.74(13)  | C14 | C15 | C16 | C17 | -55.67(17)  |
| C7 | C8  | C12 | C13 | -74.96(17)  | C15 | C16 | C17 | C12 | 53.12(18)   |
| C7 | C8  | C12 | C17 | 46.56(19)   | C17 | C12 | C13 | C14 | 52.09(16)   |

**Table 7 Hydrogen Atom Coordinates ( $\text{\AA} \times 10^4$ ) and Isotropic Displacement Parameters ( $\text{\AA}^2 \times 10^3$ ) for 3b.**

| Atom | x       | y       | z       | U(eq) |
|------|---------|---------|---------|-------|
| H2   | 2054.83 | 4607.33 | 6576.38 | 30    |
| H3   | -96.62  | 4237.74 | 5348.47 | 34    |
| H4   | -647.3  | 2922.84 | 4145.63 | 39    |

**Table 7 Hydrogen Atom Coordinates ( $\text{\AA}\times 10^4$ ) and Isotropic Displacement Parameters ( $\text{\AA}^2\times 10^3$ ) for **3b**.**

| Atom | x       | y       | z        | U(eq) |
|------|---------|---------|----------|-------|
| H5   | 980.43  | 1969.72 | 4217.95  | 39    |
| H6   | 3138.04 | 2318.98 | 5507.19  | 32    |
| H7   | 4394.99 | 4072.87 | 7969.65  | 26    |
| H9A  | 5214.67 | 2565.93 | 5012.9   | 27    |
| H9B  | 4174.94 | 3225.51 | 4016.77  | 27    |
| H11A | 8402.29 | 3636.03 | 7210.33  | 31    |
| H11B | 7449.24 | 2865.04 | 6841.04  | 31    |
| H13A | 6486.15 | 4990.85 | 5796.58  | 27    |
| H13B | 5964.28 | 5180.93 | 7310.93  | 27    |
| H14A | 8635.17 | 5066.94 | 7613.07  | 32    |
| H14B | 7914.11 | 5902.63 | 7779.25  | 32    |
| H15A | 9109.44 | 5385.85 | 10503.92 | 35    |
| H15B | 7619.11 | 5417.52 | 10287.89 | 35    |
| H16A | 8439.64 | 4129.38 | 11490.39 | 33    |
| H16B | 8999.79 | 3944.13 | 10004.92 | 33    |
| H17A | 6325.34 | 3989.5  | 9689.06  | 29    |
| H17B | 7089.18 | 3186.15 | 9467.54  | 29    |

## 9.2 X-Ray Analysis for **3ad**

Single crystals of  $\text{C}_{21}\text{H}_{21}\text{ClO}_2$  **3ad** were grown from ethyl acetate and PE. A suitable crystal was selected and collected on a SuperNova, Dual, Cu at zero, AtlasS2 diffractometer. The crystal was kept at 149.99(10) K during data collection. The data were collected and processed using CrysAlisPro. The structures were solved by direct methods using Olex2 software with the SHELXT structure solution program via intrinsic phasing algorithm, and the non-hydrogen atoms were located from the trial structure and then refined anisotropically with SHELXL-2018 using a full-matrix least squares procedure based on  $F^2$ . The weighted  $R$  factor,  $wR$  and goodness-of-fit  $S$  values were obtained based on  $F^2$ . The hydrogen atom positions were fixed geometrically at the calculated distances and allowed to ride on their parent atoms.

Crystallographic data for the structure reported in this paper have been deposited at the Cambridge Crystallographic Data Center and allocated with the deposition numbers: CCDC 2167331 for compounds **3ad**

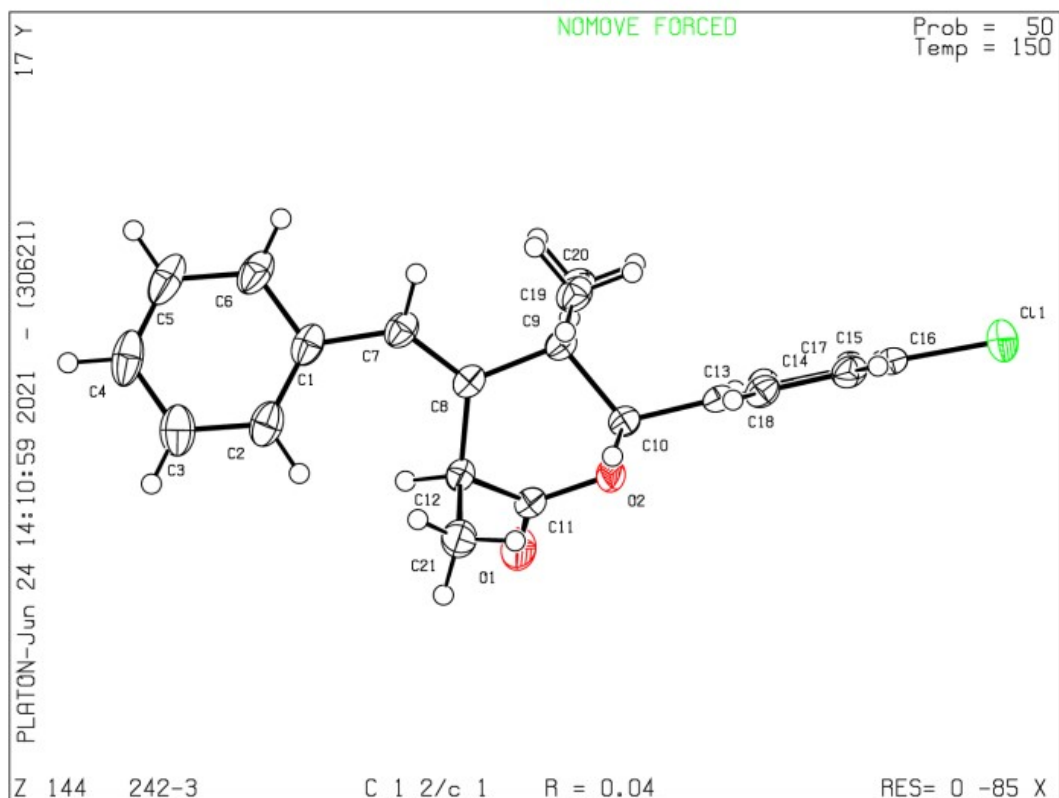

Figure S2. ORTEP Drawing of **3ad** (The ellipsoids are shown at 50% probability levels)

**Table 1 Crystal data and structure refinement for 3ad.**

|                                       |                                                  |
|---------------------------------------|--------------------------------------------------|
| Identification code                   | 3ad                                              |
| Empirical formula                     | C <sub>21</sub> H <sub>21</sub> ClO <sub>2</sub> |
| Formula weight                        | 340.83                                           |
| Temperature/K                         | 149.99(10)                                       |
| Crystal system                        | monoclinic                                       |
| Space group                           | C2/c                                             |
| a/Å                                   | 10.2977(7)                                       |
| b/Å                                   | 17.5607(12)                                      |
| c/Å                                   | 19.3729(13)                                      |
| $\alpha$ /°                           | 90                                               |
| $\beta$ /°                            | 96.121(6)                                        |
| $\gamma$ /°                           | 90                                               |
| Volume/Å <sup>3</sup>                 | 3483.3(4)                                        |
| Z                                     | 8                                                |
| $\rho_{\text{calc}}$ /cm <sup>3</sup> | 1.300                                            |
| $\mu$ /mm <sup>-1</sup>               | 0.229                                            |
| F(000)                                | 1440.0                                           |
| Crystal size/mm <sup>3</sup>          | 0.15 × 0.13 × 0.12                               |
| Radiation                             | Mo K $\alpha$ ( $\lambda$ = 0.71073)             |

|                                                  |                                                               |
|--------------------------------------------------|---------------------------------------------------------------|
| 2 $\Theta$ range for data collection/ $^{\circ}$ | 4.23 to 49.99                                                 |
| Index ranges                                     | $-12 \leq h \leq 12, -20 \leq k \leq 20, -23 \leq l \leq 17$  |
| Reflections collected                            | 7517                                                          |
| Independent reflections                          | 3066 [ $R_{\text{int}} = 0.0221, R_{\text{sigma}} = 0.0284$ ] |
| Data/restraints/parameters                       | 3066/0/220                                                    |
| Goodness-of-fit on $F^2$                         | 1.023                                                         |
| Final R indexes [ $I \geq 2\sigma(I)$ ]          | $R_1 = 0.0372, wR_2 = 0.0879$                                 |
| Final R indexes [all data]                       | $R_1 = 0.0444, wR_2 = 0.0920$                                 |
| Largest diff. peak/hole / $e \text{ \AA}^{-3}$   | 0.18/-0.23                                                    |

**Table 2 Fractional Atomic Coordinates ( $\times 10^4$ ) and Equivalent Isotropic Displacement Parameters ( $\text{\AA}^2 \times 10^3$ ) for 3ad.  $U_{\text{eq}}$  is defined as 1/3 of of the trace of the orthogonalised  $U_{ij}$  tensor.**

| Atom | $x$         | $y$        | $z$        | $U(\text{eq})$ |
|------|-------------|------------|------------|----------------|
| C11  | 1655.9(4)   | 5239.9(3)  | 2707.6(2)  | 40.27(16)      |
| O1   | 8497.0(12)  | 2475.6(7)  | 3392.3(6)  | 42.0(3)        |
| O2   | 7173.1(10)  | 3432.2(6)  | 3522.1(5)  | 27.5(3)        |
| C1   | 10435.3(17) | 3413.9(9)  | 5808.9(8)  | 30.4(4)        |
| C2   | 11559.2(17) | 3319.0(10) | 5475.6(9)  | 36.0(4)        |
| C3   | 12714.4(19) | 3059.3(11) | 5832.2(11) | 42.6(5)        |
| C4   | 12776(2)    | 2883.1(10) | 6527.5(10) | 43.7(5)        |
| C5   | 11681(2)    | 2971.5(11) | 6867.4(10) | 46.2(5)        |
| C6   | 10528(2)    | 3236.4(10) | 6515.3(9)  | 40.1(5)        |
| C7   | 9172.6(16)  | 3710.6(9)  | 5490.3(8)  | 28.9(4)        |
| C8   | 8622.0(15)  | 3735.1(9)  | 4833.6(8)  | 23.0(3)        |
| C9   | 7230.8(15)  | 4048.0(9)  | 4666.8(8)  | 23.3(3)        |
| C10  | 6972.2(15)  | 4149.7(9)  | 3873.0(8)  | 22.6(3)        |
| C11  | 8301.1(15)  | 3057.8(10) | 3689.0(8)  | 27.0(4)        |
| C12  | 9273.3(15)  | 3413.3(9)  | 4232.5(8)  | 25.9(4)        |
| C13  | 5625.7(15)  | 4416.9(9)  | 3598.8(7)  | 23.1(3)        |
| C14  | 4617.4(15)  | 3904.8(10) | 3422.2(8)  | 27.6(4)        |
| C15  | 3396.1(15)  | 4157.0(10) | 3151.9(8)  | 28.3(4)        |
| C16  | 3184.5(15)  | 4926.5(10) | 3068.5(8)  | 26.9(4)        |
| C17  | 4159.7(16)  | 5452.9(10) | 3245.1(8)  | 28.8(4)        |
| C18  | 5380.6(16)  | 5188.3(9)  | 3503.9(8)  | 26.7(4)        |
| C19  | 7090.9(18)  | 4829.4(10) | 5000.3(9)  | 31.6(4)        |
| C20  | 6247.5(16)  | 3488.7(10) | 4930.0(9)  | 32.1(4)        |
| C21  | 10094.7(17) | 3999.3(12) | 3870.2(9)  | 39.0(5)        |

**Table 3 Anisotropic Displacement Parameters ( $\text{\AA}^2 \times 10^3$ ) for 3ad. The Anisotropic displacement factor exponent takes the form:  $-2\pi^2[h^2a^{*2}U_{11}+2hka^*b^*U_{12}+\dots]$ .**

| Atom | U <sub>11</sub> | U <sub>22</sub> | U <sub>33</sub> | U <sub>23</sub> | U <sub>13</sub> | U <sub>12</sub> |
|------|-----------------|-----------------|-----------------|-----------------|-----------------|-----------------|
| C11  | 31.5(3)         | 46.0(3)         | 42.1(3)         | 6.2(2)          | -1.78(18)       | 12.0(2)         |
| O1   | 45.9(8)         | 42.5(8)         | 34.9(7)         | -16.2(6)        | -8.2(6)         | 16.0(6)         |
| O2   | 26.0(6)         | 31.3(7)         | 23.9(6)         | -6.7(5)         | -3.4(4)         | 5.0(5)          |
| C1   | 40.7(10)        | 20.3(9)         | 27.5(9)         | -4.2(7)         | -9.2(7)         | -1.3(8)         |
| C2   | 37.4(10)        | 32.1(10)        | 35.7(10)        | 2.8(8)          | -9.4(8)         | -7.1(8)         |
| C3   | 36.5(10)        | 34.3(11)        | 53.5(12)        | -0.1(9)         | -12.1(8)        | -4.8(9)         |
| C4   | 50.6(12)        | 23.9(10)        | 50.1(12)        | -3.5(8)         | -24.9(10)       | 2.3(9)          |
| C5   | 71.5(14)        | 30.4(10)        | 31.2(10)        | -4.5(8)         | -19.5(9)        | 10.6(10)        |
| C6   | 57.9(12)        | 33.2(10)        | 26.2(9)         | -6.0(8)         | -9.4(8)         | 9.8(9)          |
| C7   | 37.8(9)         | 24.0(9)         | 23.9(8)         | -1.8(7)         | -1.8(7)         | 1.2(8)          |
| C8   | 29.1(8)         | 17.7(8)         | 21.7(8)         | 1.0(6)          | 0.1(6)          | -4.6(7)         |
| C9   | 27.9(8)         | 21.8(8)         | 20.0(8)         | -0.4(6)         | 1.3(6)          | -1.2(7)         |
| C10  | 25.5(8)         | 20.5(8)         | 21.6(8)         | -2.0(6)         | 1.9(6)          | -1.6(7)         |
| C11  | 28.3(9)         | 31.9(10)        | 20.6(8)         | -0.3(7)         | 1.6(6)          | 2.2(8)          |
| C12  | 24.2(8)         | 31.3(9)         | 21.3(8)         | 1.3(7)          | -1.1(6)         | 0.3(7)          |
| C13  | 27.4(8)         | 26.2(9)         | 15.9(7)         | 0.1(6)          | 3.5(6)          | -0.2(7)         |
| C14  | 29.8(9)         | 23.2(8)         | 29.3(9)         | -0.3(7)         | 1.1(7)          | 1.6(7)          |
| C15  | 25.4(8)         | 31.1(10)        | 28.2(9)         | -2.0(7)         | 2.1(6)          | -1.1(7)         |
| C16  | 27.0(9)         | 35.7(10)        | 18.5(8)         | 2.1(7)          | 4.9(6)          | 6.1(8)          |
| C17  | 38.0(9)         | 24.5(9)         | 24.6(8)         | 5.0(7)          | 6.1(7)          | 4.9(8)          |
| C18  | 31.5(9)         | 26.0(9)         | 22.7(8)         | 2.9(7)          | 3.0(6)          | -3.5(7)         |
| C19  | 40.7(10)        | 28.8(10)        | 24.7(9)         | -4.0(7)         | 0.0(7)          | 3.3(8)          |
| C20  | 34.5(9)         | 34.4(10)        | 27.5(9)         | 5.9(7)          | 4.7(7)          | -4.7(8)         |
| C21  | 28.4(9)         | 53.8(12)        | 34.8(10)        | 11.7(9)         | 3.2(7)          | -4.2(9)         |

**Table 4 Bond Lengths for 3ad.**

| Atom | Atom | Length/Å   | Atom | Atom | Length/Å |
|------|------|------------|------|------|----------|
| C11  | C16  | 1.7421(16) | C8   | C12  | 1.514(2) |
| O1   | C11  | 1.200(2)   | C9   | C10  | 1.543(2) |
| O2   | C10  | 1.4569(18) | C9   | C19  | 1.530(2) |
| O2   | C11  | 1.3439(19) | C9   | C20  | 1.536(2) |
| C1   | C2   | 1.394(3)   | C10  | C13  | 1.506(2) |
| C1   | C6   | 1.397(2)   | C11  | C12  | 1.509(2) |
| C1   | C7   | 1.474(2)   | C12  | C21  | 1.547(2) |
| C2   | C3   | 1.387(2)   | C13  | C14  | 1.389(2) |
| C3   | C4   | 1.377(3)   | C13  | C18  | 1.387(2) |
| C4   | C5   | 1.374(3)   | C14  | C15  | 1.383(2) |
| C5   | C6   | 1.385(3)   | C15  | C16  | 1.375(2) |
| C7   | C8   | 1.337(2)   | C16  | C17  | 1.381(2) |

**Table 4 Bond Lengths for 3ad.**

| Atom | Atom | Length/Å | Atom | Atom | Length/Å |
|------|------|----------|------|------|----------|
| C8   | C9   | 1.536(2) | C17  | C18  | 1.383(2) |

**Table 5 Bond Angles for 3ad.**

| Atom | Atom | Atom | Angle/°    | Atom | Atom | Atom | Angle/°    |
|------|------|------|------------|------|------|------|------------|
| C11  | O2   | C10  | 118.23(12) | O2   | C10  | C9   | 110.30(12) |
| C2   | C1   | C6   | 116.97(16) | O2   | C10  | C13  | 106.02(12) |
| C2   | C1   | C7   | 125.96(15) | C13  | C10  | C9   | 116.24(12) |
| C6   | C1   | C7   | 117.03(16) | O1   | C11  | O2   | 119.11(15) |
| C3   | C2   | C1   | 121.24(17) | O1   | C11  | C12  | 123.63(15) |
| C4   | C3   | C2   | 120.55(19) | O2   | C11  | C12  | 117.24(14) |
| C5   | C4   | C3   | 119.29(17) | C8   | C12  | C21  | 114.16(14) |
| C4   | C5   | C6   | 120.39(18) | C11  | C12  | C8   | 112.08(13) |
| C5   | C6   | C1   | 121.54(19) | C11  | C12  | C21  | 108.23(13) |
| C8   | C7   | C1   | 132.50(16) | C14  | C13  | C10  | 121.43(14) |
| C7   | C8   | C9   | 120.19(14) | C18  | C13  | C10  | 119.92(14) |
| C7   | C8   | C12  | 122.83(15) | C18  | C13  | C14  | 118.63(15) |
| C12  | C8   | C9   | 116.84(12) | C15  | C14  | C13  | 120.80(16) |
| C8   | C9   | C10  | 107.99(12) | C16  | C15  | C14  | 119.04(16) |
| C8   | C9   | C20  | 109.54(13) | C15  | C16  | C11  | 118.85(13) |
| C19  | C9   | C8   | 111.08(13) | C15  | C16  | C17  | 121.78(15) |
| C19  | C9   | C10  | 107.64(13) | C17  | C16  | C11  | 119.34(13) |
| C19  | C9   | C20  | 109.76(13) | C16  | C17  | C18  | 118.28(16) |
| C20  | C9   | C10  | 110.80(13) | C17  | C18  | C13  | 121.45(15) |

**Table 6 Torsion Angles for 3ad.**

| A   | B   | C   | D   | Angle/°     | A   | B   | C   | D   | Angle/°     |
|-----|-----|-----|-----|-------------|-----|-----|-----|-----|-------------|
| C11 | C16 | C17 | C18 | -177.35(12) | C8  | C9  | C10 | C13 | 177.06(13)  |
| O1  | C11 | C12 | C8  | -139.75(17) | C9  | C8  | C12 | C11 | -31.77(19)  |
| O1  | C11 | C12 | C21 | 93.5(2)     | C9  | C8  | C12 | C21 | 91.73(16)   |
| O2  | C10 | C13 | C14 | 34.07(18)   | C9  | C10 | C13 | C14 | -88.89(17)  |
| O2  | C10 | C13 | C18 | -144.50(14) | C9  | C10 | C13 | C18 | 92.54(17)   |
| O2  | C11 | C12 | C8  | 42.03(19)   | C10 | O2  | C11 | O1  | -178.12(14) |
| O2  | C11 | C12 | C21 | -84.74(17)  | C10 | O2  | C11 | C12 | 0.2(2)      |
| C1  | C2  | C3  | C4  | 0.4(3)      | C10 | C13 | C14 | C15 | -178.08(14) |
| C1  | C7  | C8  | C9  | 176.52(16)  | C10 | C13 | C18 | C17 | 179.20(14)  |
| C1  | C7  | C8  | C12 | 1.0(3)      | C11 | O2  | C10 | C9  | -51.59(17)  |
| C2  | C1  | C6  | C5  | -0.6(3)     | C11 | O2  | C10 | C13 | -178.22(12) |
| C2  | C1  | C7  | C8  | 24.1(3)     | C12 | C8  | C9  | C10 | -15.06(18)  |



**Table 6 Torsion Angles for 3ad.**

| A  | B  | C   | D   | Angle/°     | A   | B   | C   | D   | Angle/°     |
|----|----|-----|-----|-------------|-----|-----|-----|-----|-------------|
| C2 | C3 | C4  | C5  | -0.4(3)     | C12 | C8  | C9  | C19 | -132.88(14) |
| C3 | C4 | C5  | C6  | -0.1(3)     | C12 | C8  | C9  | C20 | 105.70(15)  |
| C4 | C5 | C6  | C1  | 0.6(3)      | C13 | C14 | C15 | C16 | -0.9(2)     |
| C6 | C1 | C2  | C3  | 0.0(3)      | C14 | C13 | C18 | C17 | 0.6(2)      |
| C6 | C1 | C7  | C8  | -158.25(18) | C14 | C15 | C16 | C11 | 178.41(12)  |
| C7 | C1 | C2  | C3  | 177.67(16)  | C14 | C15 | C16 | C17 | 0.2(2)      |
| C7 | C1 | C6  | C5  | -178.41(16) | C15 | C16 | C17 | C18 | 0.8(2)      |
| C7 | C8 | C9  | C10 | 169.11(14)  | C16 | C17 | C18 | C13 | -1.2(2)     |
| C7 | C8 | C9  | C19 | 51.29(19)   | C18 | C13 | C14 | C15 | 0.5(2)      |
| C7 | C8 | C9  | C20 | -70.13(18)  | C19 | C9  | C10 | O2  | 176.37(12)  |
| C7 | C8 | C12 | C11 | 143.94(16)  | C19 | C9  | C10 | C13 | -62.93(17)  |
| C7 | C8 | C12 | C21 | -92.56(19)  | C20 | C9  | C10 | O2  | -63.60(16)  |
| C8 | C9 | C10 | O2  | 56.37(15)   | C20 | C9  | C10 | C13 | 57.09(18)   |

**Table 7 Hydrogen Atom Coordinates ( $\text{\AA} \times 10^4$ ) and Isotropic Displacement Parameters ( $\text{\AA}^2 \times 10^3$ ) for 3ad.**

| Atom | x        | y       | z       | U(eq) |
|------|----------|---------|---------|-------|
| H2   | 11534.2  | 3431.82 | 5005.33 | 43    |
| H3   | 13453.6  | 3003.73 | 5599.7  | 51    |
| H4   | 13549.8  | 2706.14 | 6764.48 | 52    |
| H5   | 11713.78 | 2852.78 | 7336.78 | 55    |
| H6   | 9798.97  | 3297.42 | 6754.73 | 48    |
| H7   | 8658.91  | 3921.96 | 5807.6  | 35    |
| H10  | 7604.87  | 4519.2  | 3730.12 | 27    |
| H12  | 9867.29  | 3009.16 | 4418.22 | 31    |
| H14  | 4765.35  | 3385.93 | 3486.38 | 33    |
| H15  | 2727.26  | 3811.41 | 3028.24 | 34    |
| H17  | 3999.73  | 5971.92 | 3191.54 | 35    |
| H18  | 6051.87  | 5535.47 | 3616.62 | 32    |
| H19A | 7272.17  | 4785.93 | 5495.17 | 47    |
| H19B | 6216.32  | 5013.36 | 4886.78 | 47    |
| H19C | 7696.42  | 5179.18 | 4828.22 | 47    |
| H20A | 6329.2   | 3001.65 | 4713.85 | 48    |
| H20B | 5377.18  | 3679.2  | 4816.23 | 48    |
| H20C | 6421.73  | 3435.88 | 5424.43 | 48    |
| H21A | 9523.97  | 4361    | 3620.91 | 59    |
| H21B | 10596.18 | 3739.97 | 3552.09 | 59    |
| H21C | 10673.59 | 4260.39 | 4212.69 | 59    |

### 9.3 X-Ray Analysis for 4a

Single crystals of  $C_{14}H_{14}N_2O_2$  **4a** were grown from ethyl acetate and PE. A suitable crystal was selected and collected on a SuperNova, Dual, Cu at zero, AtlasS2 diffractometer. The crystal was kept at 179.99(10) K during data collection. The data were collected and processed using CrysAlisPro. The structures were solved by direct methods using Olex2 software with the SHELXT structure solution program via intrinsic phasing algorithm, and the non-hydrogen atoms were located from the trial structure and then refined anisotropically with SHELXL-2018 using a full-matrix least squares procedure based on  $F^2$ . The weighted  $R$  factor,  $wR$  and goodness-of-fit  $S$  values were obtained based on  $F^2$ . The hydrogen atom positions were fixed geometrically at the calculated distances and allowed to ride on their parent atoms.

Crystallographic data for the structure reported in this paper have been deposited at the Cambridge Crystallographic Data Center and allocated with the deposition numbers: CCDC 2167332 for compounds **4a**

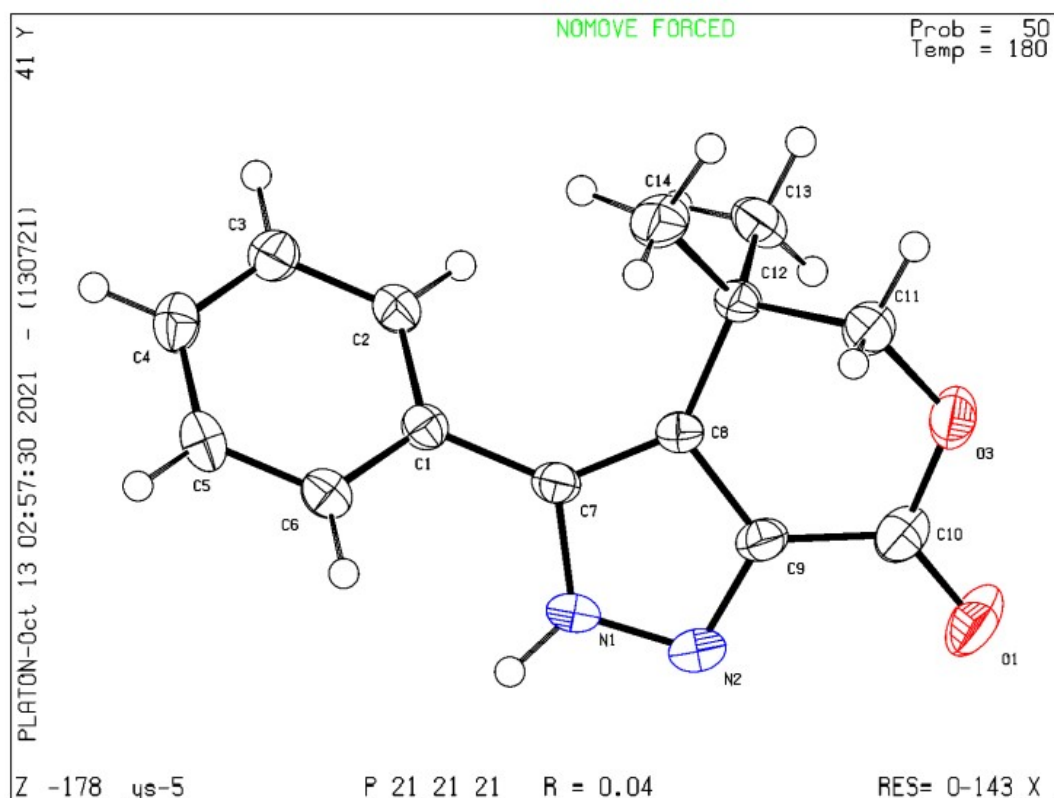

Figure S3. ORTEP Drawing of **4a** (The ellipsoids are shown at 50% probability levels)

**Table 1 Crystal data and structure refinement for 4a.**

|                     |                      |
|---------------------|----------------------|
| Identification code | 4a                   |
| Empirical formula   | $C_{14}H_{14}N_2O_2$ |
| Formula weight      | 242.27               |
| Temperature/K       | 179.99(10)           |
| Crystal system      | orthorhombic         |

|                                             |                                                               |
|---------------------------------------------|---------------------------------------------------------------|
| Space group                                 | P2 <sub>1</sub> 2 <sub>1</sub> 2 <sub>1</sub>                 |
| a/Å                                         | 6.4356(3)                                                     |
| b/Å                                         | 12.2960(5)                                                    |
| c/Å                                         | 15.5108(7)                                                    |
| $\alpha$ /°                                 | 90                                                            |
| $\beta$ /°                                  | 90                                                            |
| $\gamma$ /°                                 | 90                                                            |
| Volume/Å <sup>3</sup>                       | 1227.40(9)                                                    |
| Z                                           | 4                                                             |
| $\rho_{\text{calc}}$ /g/cm <sup>3</sup>     | 1.311                                                         |
| $\mu$ /mm <sup>-1</sup>                     | 0.724                                                         |
| F(000)                                      | 512.0                                                         |
| Crystal size/mm <sup>3</sup>                | 0.14 × 0.1 × 0.08                                             |
| Radiation                                   | Cu K $\alpha$ ( $\lambda$ = 1.54184)                          |
| 2 $\Theta$ range for data collection/°      | 9.178 to 147.64                                               |
| Index ranges                                | -7 ≤ h ≤ 4, -15 ≤ k ≤ 6, -13 ≤ l ≤ 18                         |
| Reflections collected                       | 3039                                                          |
| Independent reflections                     | 2152 [R <sub>int</sub> = 0.0281, R <sub>sigma</sub> = 0.0462] |
| Data/restraints/parameters                  | 2152/0/169                                                    |
| Goodness-of-fit on F <sup>2</sup>           | 1.092                                                         |
| Final R indexes [I ≥ 2 $\sigma$ (I)]        | R <sub>1</sub> = 0.0415, wR <sub>2</sub> = 0.1058             |
| Final R indexes [all data]                  | R <sub>1</sub> = 0.0465, wR <sub>2</sub> = 0.1106             |
| Largest diff. peak/hole / e Å <sup>-3</sup> | 0.15/-0.23                                                    |
| Flack parameter                             | 0.0(3)                                                        |

**Table 2 Fractional Atomic Coordinates ( $\times 10^4$ ) and Equivalent Isotropic Displacement Parameters ( $\text{\AA}^2 \times 10^3$ ) for 4a.  $U_{\text{eq}}$  is defined as 1/3 of the trace of the orthogonalised  $U_{ij}$  tensor.**

| Atom | x        | y          | z          | U(eq)   |
|------|----------|------------|------------|---------|
| O1   | 137(4)   | 4444(2)    | 4399.8(17) | 51.0(7) |
| O3   | 1222(3)  | 5969.9(18) | 5020.4(15) | 38.7(5) |
| N1   | 5192(4)  | 3143(2)    | 5690.6(17) | 34.9(6) |
| N2   | 3644(4)  | 3325(2)    | 5135.7(18) | 37.2(6) |
| C1   | 7369(4)  | 3947(2)    | 6835.8(18) | 23.6(5) |
| C2   | 7139(4)  | 4394(2)    | 7657.7(18) | 27.0(6) |
| C3   | 8748(5)  | 4344(2)    | 8248.4(19) | 31.2(6) |
| C4   | 10585(5) | 3811(2)    | 8030(2)    | 31.8(6) |
| C5   | 10801(4) | 3342(2)    | 7224(2)    | 29.9(6) |
| C6   | 9205(4)  | 3406(2)    | 6629.0(19) | 26.6(6) |
| C7   | 5684(4)  | 4018(2)    | 6195.9(18) | 24.2(5) |
| C8   | 4331(4)  | 4835(2)    | 5945.0(17) | 21.6(5) |

**Table 2 Fractional Atomic Coordinates ( $\times 10^4$ ) and Equivalent Isotropic Displacement Parameters ( $\text{\AA}^2 \times 10^3$ ) for 4a.  $U_{\text{eq}}$  is defined as 1/3 of the trace of the orthogonalised  $U_{ij}$  tensor.**

| Atom | x       | y       | z          | U(eq)   |
|------|---------|---------|------------|---------|
| C9   | 3127(4) | 4360(2) | 5290.9(18) | 27.5(6) |
| C10  | 1409(5) | 4885(2) | 4857(2)    | 33.7(7) |
| C11  | 3032(5) | 6533(2) | 5378(2)    | 34.6(7) |
| C12  | 3967(4) | 6007(2) | 6183.4(17) | 23.7(5) |
| C13  | 2444(5) | 6120(2) | 6939(2)    | 33.7(7) |
| C14  | 5978(5) | 6628(2) | 6376(2)    | 36.4(7) |

**Table 3 Anisotropic Displacement Parameters ( $\text{\AA}^2 \times 10^3$ ) for 4a. The Anisotropic displacement factor exponent takes the form:  $-2\pi^2[h^2a^{*2}U_{11}+2hka^*b^*U_{12}+\dots]$ .**

| Atom | $U_{11}$ | $U_{22}$ | $U_{33}$ | $U_{23}$  | $U_{13}$  | $U_{12}$  |
|------|----------|----------|----------|-----------|-----------|-----------|
| O1   | 51.1(14) | 50.4(14) | 51.4(14) | 7.8(13)   | -28.4(12) | -16.7(12) |
| O3   | 37.3(11) | 35.8(11) | 42.9(12) | 5.8(10)   | -15.6(10) | 0.2(9)    |
| N1   | 41.8(15) | 25.8(11) | 37.0(14) | -14.0(11) | -7.7(11)  | 8.2(11)   |
| N2   | 43.8(14) | 31.9(13) | 36.0(14) | -12.9(12) | -9.3(12)  | 2.4(11)   |
| C1   | 26.8(13) | 19.1(11) | 24.8(13) | 2.2(11)   | -0.3(11)  | -0.8(10)  |
| C2   | 25.7(12) | 25.6(12) | 29.6(14) | -1.0(12)  | 1.4(11)   | 3.5(11)   |
| C3   | 37.5(14) | 30.5(14) | 25.7(13) | 0.3(12)   | -2.2(12)  | 3.0(12)   |
| C4   | 30.5(14) | 32.7(14) | 32.1(15) | 7.7(13)   | -5.2(12)  | 0.8(12)   |
| C5   | 23.9(13) | 29.3(13) | 36.5(15) | 8.6(13)   | 3.4(12)   | 4.7(11)   |
| C6   | 28.1(13) | 23.9(12) | 27.9(14) | 1.9(11)   | 4.4(11)   | 1.1(11)   |
| C7   | 25.2(12) | 21.3(11) | 26.2(13) | -4.7(11)  | 1.0(11)   | 0.9(10)   |
| C8   | 22.6(12) | 20.3(11) | 21.9(12) | -2.1(10)  | 1.4(10)   | -2.1(10)  |
| C9   | 30.5(14) | 25.9(12) | 26.2(14) | -5.6(12)  | -3.2(11)  | -3.1(11)  |
| C10  | 37.8(15) | 33.5(14) | 29.7(15) | 3.9(13)   | -7.0(13)  | -8.0(12)  |
| C11  | 42.7(16) | 25.3(12) | 35.7(16) | 3.5(12)   | -9.6(14)  | -3.2(13)  |
| C12  | 28.0(13) | 17.9(11) | 25.3(13) | -1.0(10)  | -2.5(11)  | -0.9(10)  |
| C13  | 39.9(16) | 26.5(12) | 34.6(16) | -2.0(13)  | 3.9(13)   | 8.8(12)   |
| C14  | 42.3(17) | 24.4(14) | 42.5(17) | 0.7(13)   | -8.5(14)  | -9.6(13)  |

**Table 4 Bond Lengths for 4a.**

| Atom | Atom | Length/ $\text{\AA}$ | Atom | Atom | Length/ $\text{\AA}$ |
|------|------|----------------------|------|------|----------------------|
| O1   | C10  | 1.211(4)             | C3   | C4   | 1.393(4)             |
| O3   | C10  | 1.364(4)             | C4   | C5   | 1.384(4)             |
| O3   | C11  | 1.465(4)             | C5   | C6   | 1.384(4)             |
| N1   | N2   | 1.336(4)             | C7   | C8   | 1.385(4)             |

**Table 4 Bond Lengths for 4a.**

| Atom | Atom | Length/Å | Atom | Atom | Length/Å |
|------|------|----------|------|------|----------|
| N1   | C7   | 1.368(4) | C8   | C9   | 1.403(4) |
| N2   | C9   | 1.337(4) | C8   | C12  | 1.506(3) |
| C1   | C2   | 1.396(4) | C9   | C10  | 1.446(4) |
| C1   | C6   | 1.393(4) | C11  | C12  | 1.530(4) |
| C1   | C7   | 1.473(4) | C12  | C13  | 1.534(4) |
| C2   | C3   | 1.384(4) | C12  | C14  | 1.532(4) |

**Table 5 Bond Angles for 4a.**

| Atom | Atom | Atom | Angle/°  | Atom | Atom | Atom | Angle/°  |
|------|------|------|----------|------|------|------|----------|
| C10  | O3   | C11  | 117.6(2) | C7   | C8   | C12  | 136.3(2) |
| N2   | N1   | C7   | 114.2(2) | C9   | C8   | C12  | 119.3(2) |
| N1   | N2   | C9   | 103.2(2) | N2   | C9   | C8   | 112.9(3) |
| C2   | C1   | C7   | 120.9(2) | N2   | C9   | C10  | 122.0(3) |
| C6   | C1   | C2   | 119.2(3) | C8   | C9   | C10  | 124.9(3) |
| C6   | C1   | C7   | 119.9(3) | O1   | C10  | O3   | 119.1(3) |
| C3   | C2   | C1   | 120.5(3) | O1   | C10  | C9   | 126.2(3) |
| C2   | C3   | C4   | 119.7(3) | O3   | C10  | C9   | 114.7(3) |
| C5   | C4   | C3   | 120.0(3) | O3   | C11  | C12  | 115.0(2) |
| C6   | C5   | C4   | 120.3(3) | C8   | C12  | C11  | 105.4(2) |
| C5   | C6   | C1   | 120.2(3) | C8   | C12  | C13  | 111.9(2) |
| N1   | C7   | C1   | 120.6(2) | C8   | C12  | C14  | 113.2(2) |
| N1   | C7   | C8   | 105.3(2) | C11  | C12  | C13  | 109.5(2) |
| C8   | C7   | C1   | 134.1(2) | C11  | C12  | C14  | 106.3(2) |
| C7   | C8   | C9   | 104.4(2) | C14  | C12  | C13  | 110.2(2) |

**Table 6 Torsion Angles for 4a.**

| A  | B   | C   | D   | Angle/°   | A  | B  | C   | D   | Angle/°   |
|----|-----|-----|-----|-----------|----|----|-----|-----|-----------|
| O3 | C11 | C12 | C8  | 52.3(3)   | C6 | C1 | C7  | N1  | 40.8(4)   |
| O3 | C11 | C12 | C13 | -68.3(3)  | C6 | C1 | C7  | C8  | -138.7(3) |
| O3 | C11 | C12 | C14 | 172.7(2)  | C7 | N1 | N2  | C9  | 0.2(3)    |
| N1 | N2  | C9  | C8  | -0.4(3)   | C7 | C1 | C2  | C3  | -178.6(3) |
| N1 | N2  | C9  | C10 | -176.5(3) | C7 | C1 | C6  | C5  | 179.6(2)  |
| N1 | C7  | C8  | C9  | -0.3(3)   | C7 | C8 | C9  | N2  | 0.4(3)    |
| N1 | C7  | C8  | C12 | -178.2(3) | C7 | C8 | C9  | C10 | 176.4(3)  |
| N2 | N1  | C7  | C1  | -179.6(3) | C7 | C8 | C12 | C11 | 152.6(3)  |
| N2 | N1  | C7  | C8  | 0.1(3)    | C7 | C8 | C12 | C13 | -88.4(4)  |
| N2 | C9  | C10 | O1  | 8.8(5)    | C7 | C8 | C12 | C14 | 36.8(4)   |
| N2 | C9  | C10 | O3  | -173.5(3) | C8 | C9 | C10 | O1  | -166.9(3) |

**Table 6 Torsion Angles for 4a.**

| A  | B  | C  | D   | Angle/°   | A   | B  | C   | D   | Angle/°   |
|----|----|----|-----|-----------|-----|----|-----|-----|-----------|
| C1 | C2 | C3 | C4  | -2.2(4)   | C8  | C9 | C10 | O3  | 10.8(4)   |
| C1 | C7 | C8 | C9  | 179.3(3)  | C9  | C8 | C12 | C11 | -25.1(3)  |
| C1 | C7 | C8 | C12 | 1.4(6)    | C9  | C8 | C12 | C13 | 93.9(3)   |
| C2 | C1 | C6 | C5  | -1.8(4)   | C9  | C8 | C12 | C14 | -140.9(3) |
| C2 | C1 | C7 | N1  | -137.7(3) | C10 | O3 | C11 | C12 | -52.1(4)  |
| C2 | C1 | C7 | C8  | 42.7(5)   | C11 | O3 | C10 | O1  | -164.4(3) |
| C2 | C3 | C4 | C5  | 0.5(4)    | C11 | O3 | C10 | C9  | 17.7(4)   |
| C3 | C4 | C5 | C6  | 0.5(4)    | C12 | C8 | C9  | N2  | 178.8(3)  |
| C4 | C5 | C6 | C1  | 0.2(4)    | C12 | C8 | C9  | C10 | -5.2(4)   |
| C6 | C1 | C2 | C3  | 2.9(4)    |     |    |     |     |           |

**Table 7 Hydrogen Atom Coordinates ( $\text{\AA}\times 10^4$ ) and Isotropic Displacement Parameters ( $\text{\AA}^2\times 10^3$ ) for 4a.**

| Atom | x        | y        | z        | U(eq)  |
|------|----------|----------|----------|--------|
| H1   | 5960(60) | 2540(40) | 5650(30) | 55(12) |
| H2   | 5895.32  | 4727.35  | 7809.56  | 32     |
| H3   | 8604.28  | 4664.34  | 8788.13  | 37     |
| H4   | 11666.4  | 3770.16  | 8426.75  | 38     |
| H5   | 12024.46 | 2981.3   | 7082.39  | 36     |
| H6   | 9358.25  | 3087.3   | 6088.97  | 32     |
| H11A | 2632.31  | 7273.02  | 5519     | 41     |
| H11B | 4098.13  | 6571.16  | 4937.4   | 41     |
| H13A | 1160.36  | 5764.69  | 6797.12  | 51     |
| H13B | 2187.44  | 6876.25  | 7049.01  | 51     |
| H13C | 3031.48  | 5789     | 7443.98  | 51     |
| H14A | 6520     | 6399.52  | 6923.46  | 55     |
| H14B | 5693.54  | 7394.28  | 6392.36  | 55     |
| H14C | 6980.42  | 6479.9   | 5933.02  | 55     |

## 10. Reference

1. H.-J. Tang, X.-G. Zhang, Y.-F. Zhang, C. Fen, Visible-Light-Assisted Gold-Catalyzed Fluoroarylation of Allenates, *Angew. Chem., Int. Ed.*, 2020, **59**, 5242 – 5247.

2. S. Castellano, H. D. G. Fiji, S. S. Kinderman, M. Leon, P. D. Watanabe, F. Tamanoi, O. Kwon, Small-Molecule Inhibitors of Protein Geranylgeranyltransferase Type I, *J. Am. Chem. Soc.*, 2007, **129**, 5843-5845;
3. G. B. Chai, Z. Lu, C. L. Fu, S. M. Ma, Ferric Chloride Hexahydrate-Catalyzed Highly Regio- and Stereoselective Conjugate Addition Reaction of 2,3-Allenates with Grignard Reagents: An Efficient Synthesis of  $\beta$ ,  $\gamma$ -Alkenoates, *Adv. Synth. Catal.*, 2009, **351**, 1946 – 1954.
4. A. Kapat, E. Nyfeler, G. T. Giuffredi, P. Renaud, Intramolecular Schmidt Reaction Involving Primary Azidoalcohols under Nonacidic Conditions: Synthesis of Indolizidine (-)-167B, *J. Am. Chem. Soc.*, 2009, **131**, 17746-17747.
5. B. M. Loertscher, P. R. Young, P. R. Evans, S. L. Castle, Diastereoselective Synthesis of Vicinal Tertiary Diols, *Org. Lett.*, 2013, **15**, 1930-1933; (b) J. Barluenga, F. J. Fañanás, R. Sanz, C. Marcos, M. Trabada, On the Reactivity of *o*-Lithioaryl Ethers: Tandem Anion Translocation and Wittig Rearrangement, *Org. Lett.*, 2002, **4**, 1587-1590.
6. W. Gladkowski, A. Skrobiszewski, M. Mazur, M. Siepka, A. Pawlak, B. O. nska-Mrukowicz, A. Bialonska, D. Poradowski, A. Drynda, M. Urbaniak, Synthesis and anticancer activity of novel halolactones with  $\beta$ -aryl substituents from simple aromatic aldehydes, *Tetrahedron.*, 2013, **69**, 10414-10423.

## 11. Copies of NMR and IR Spectra

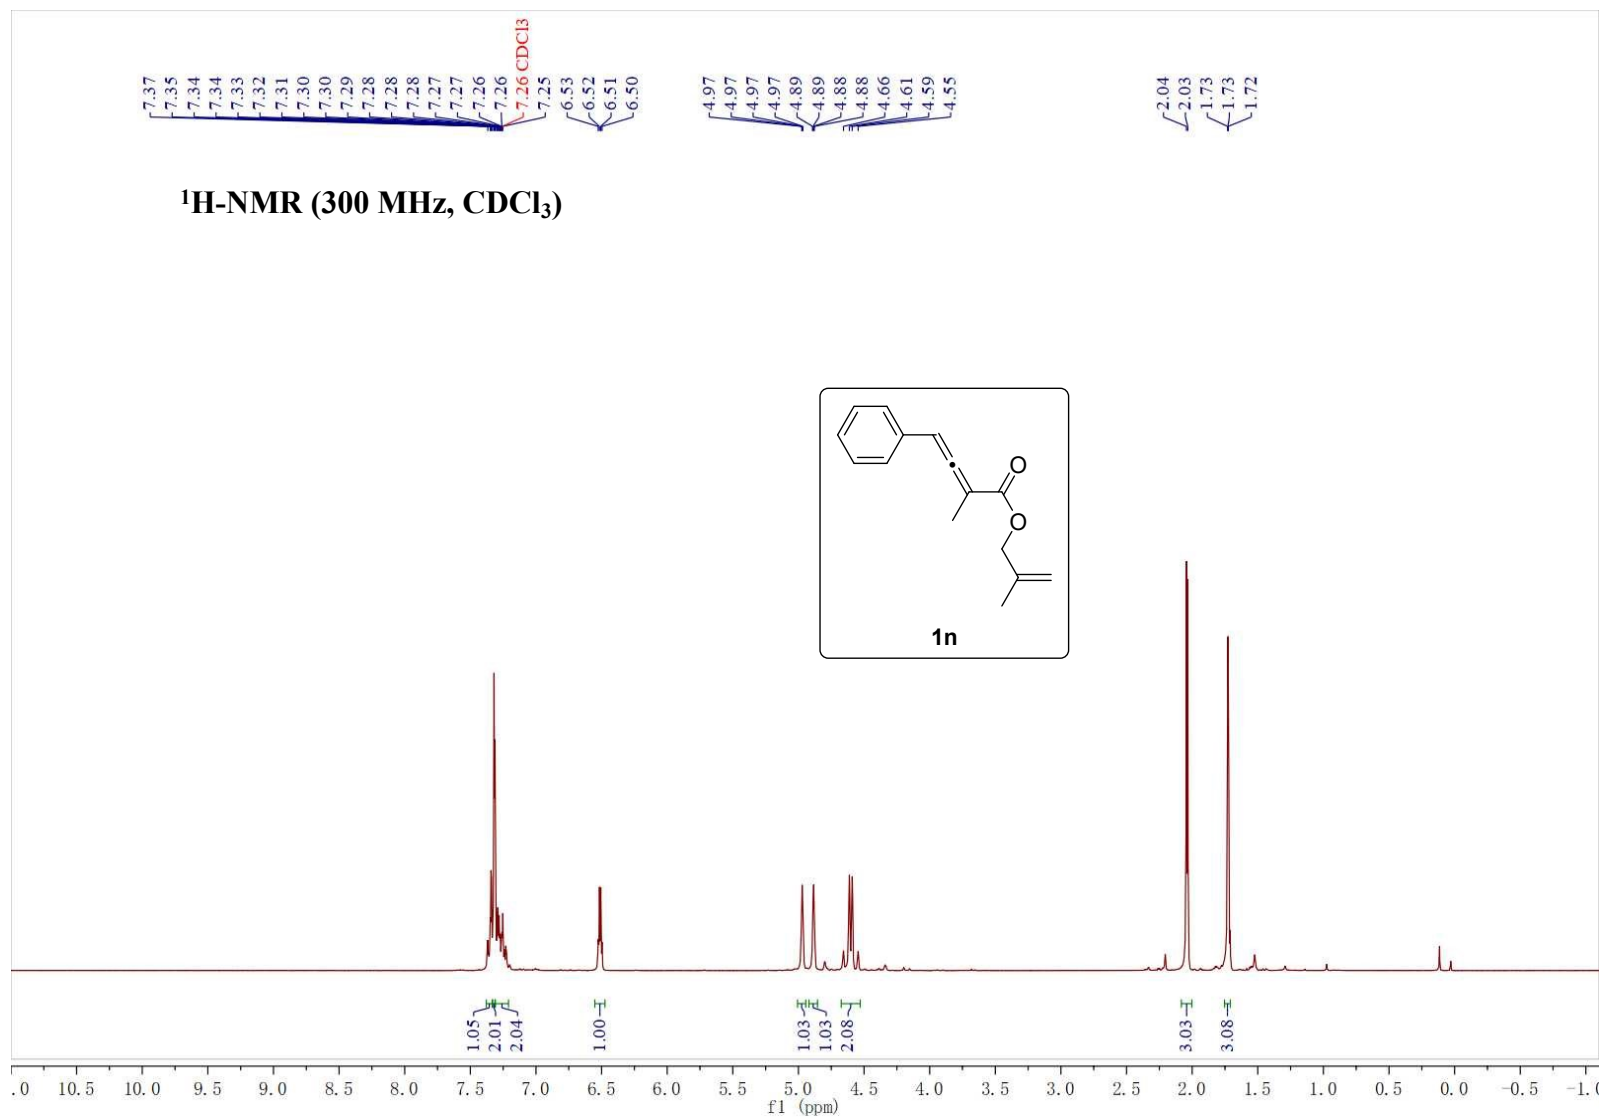



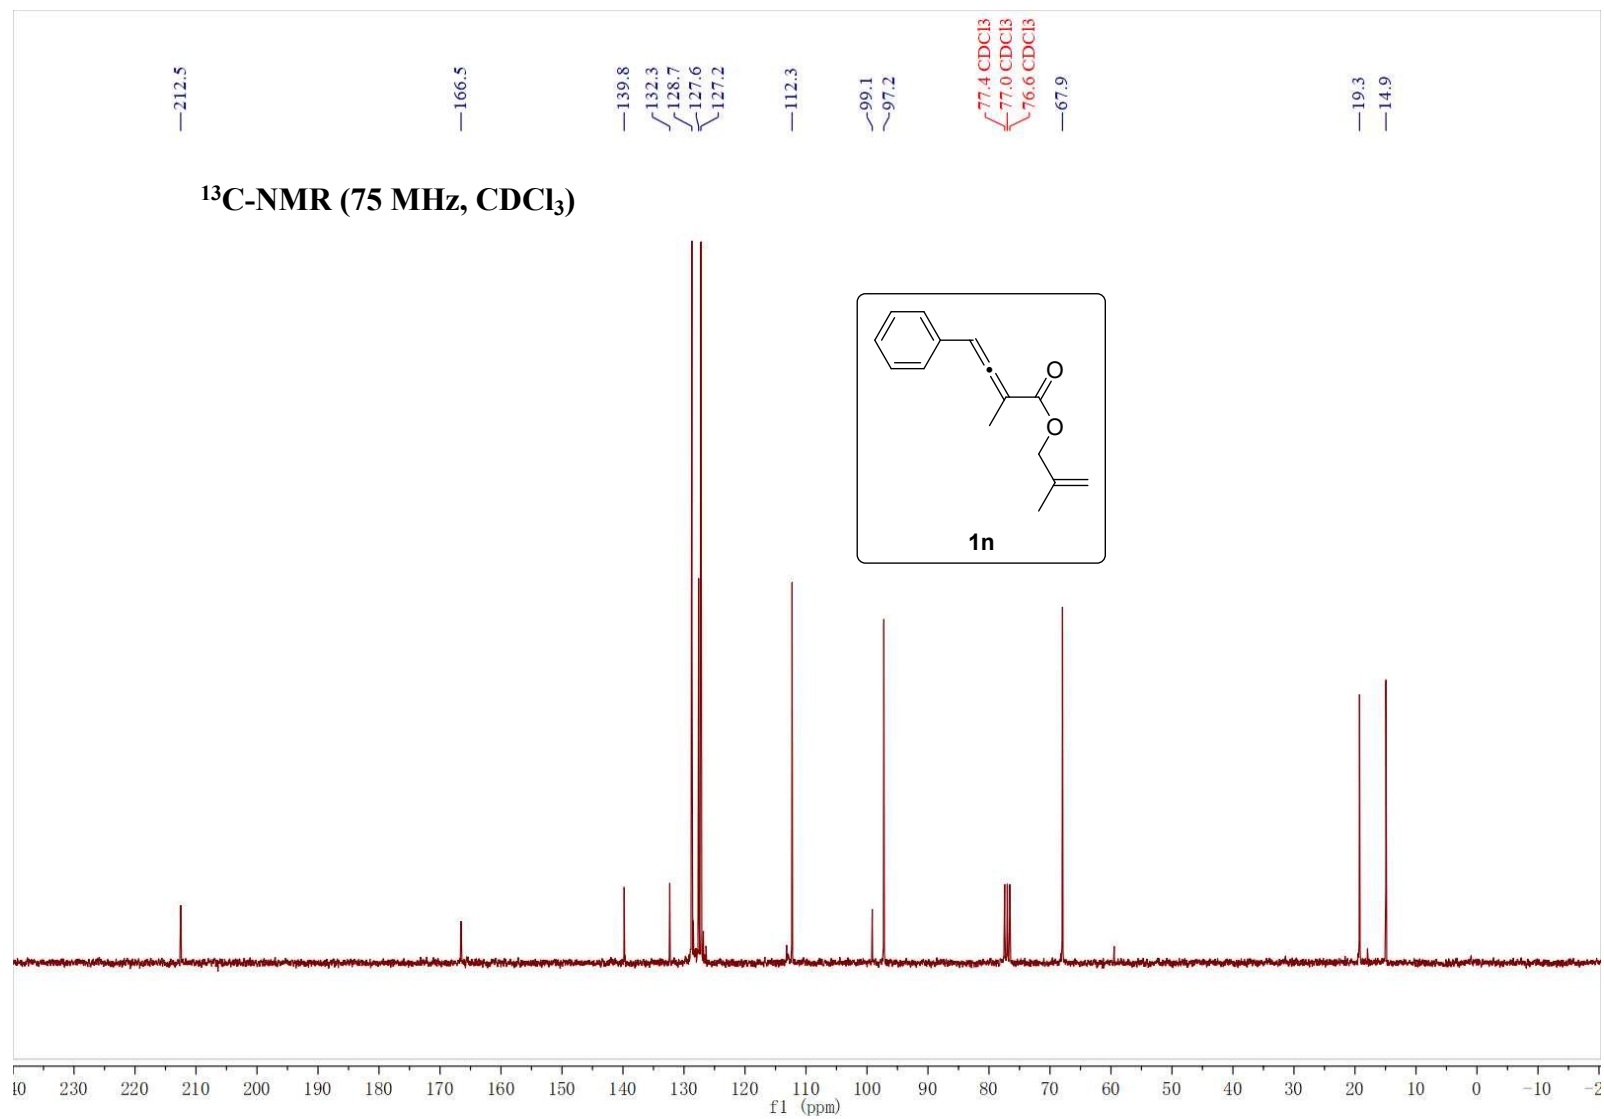

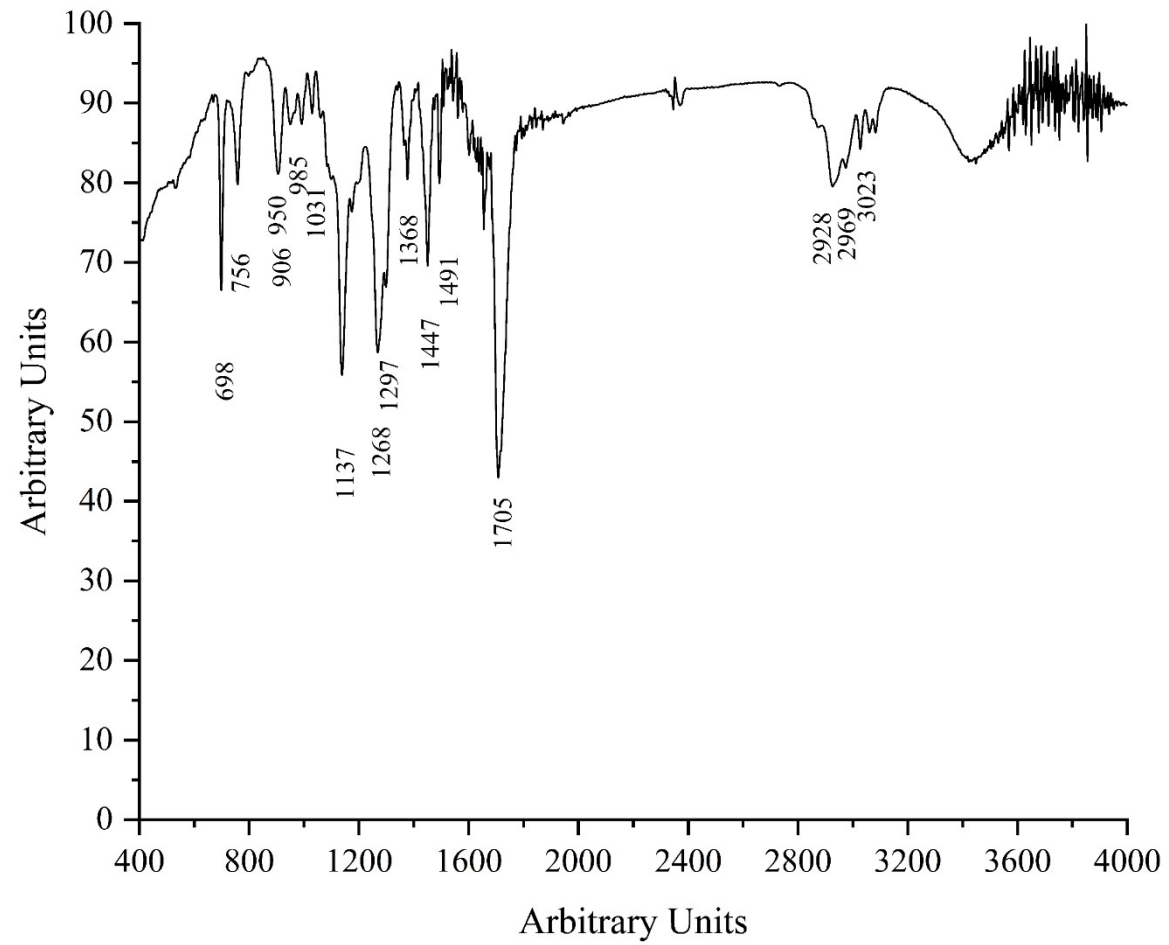

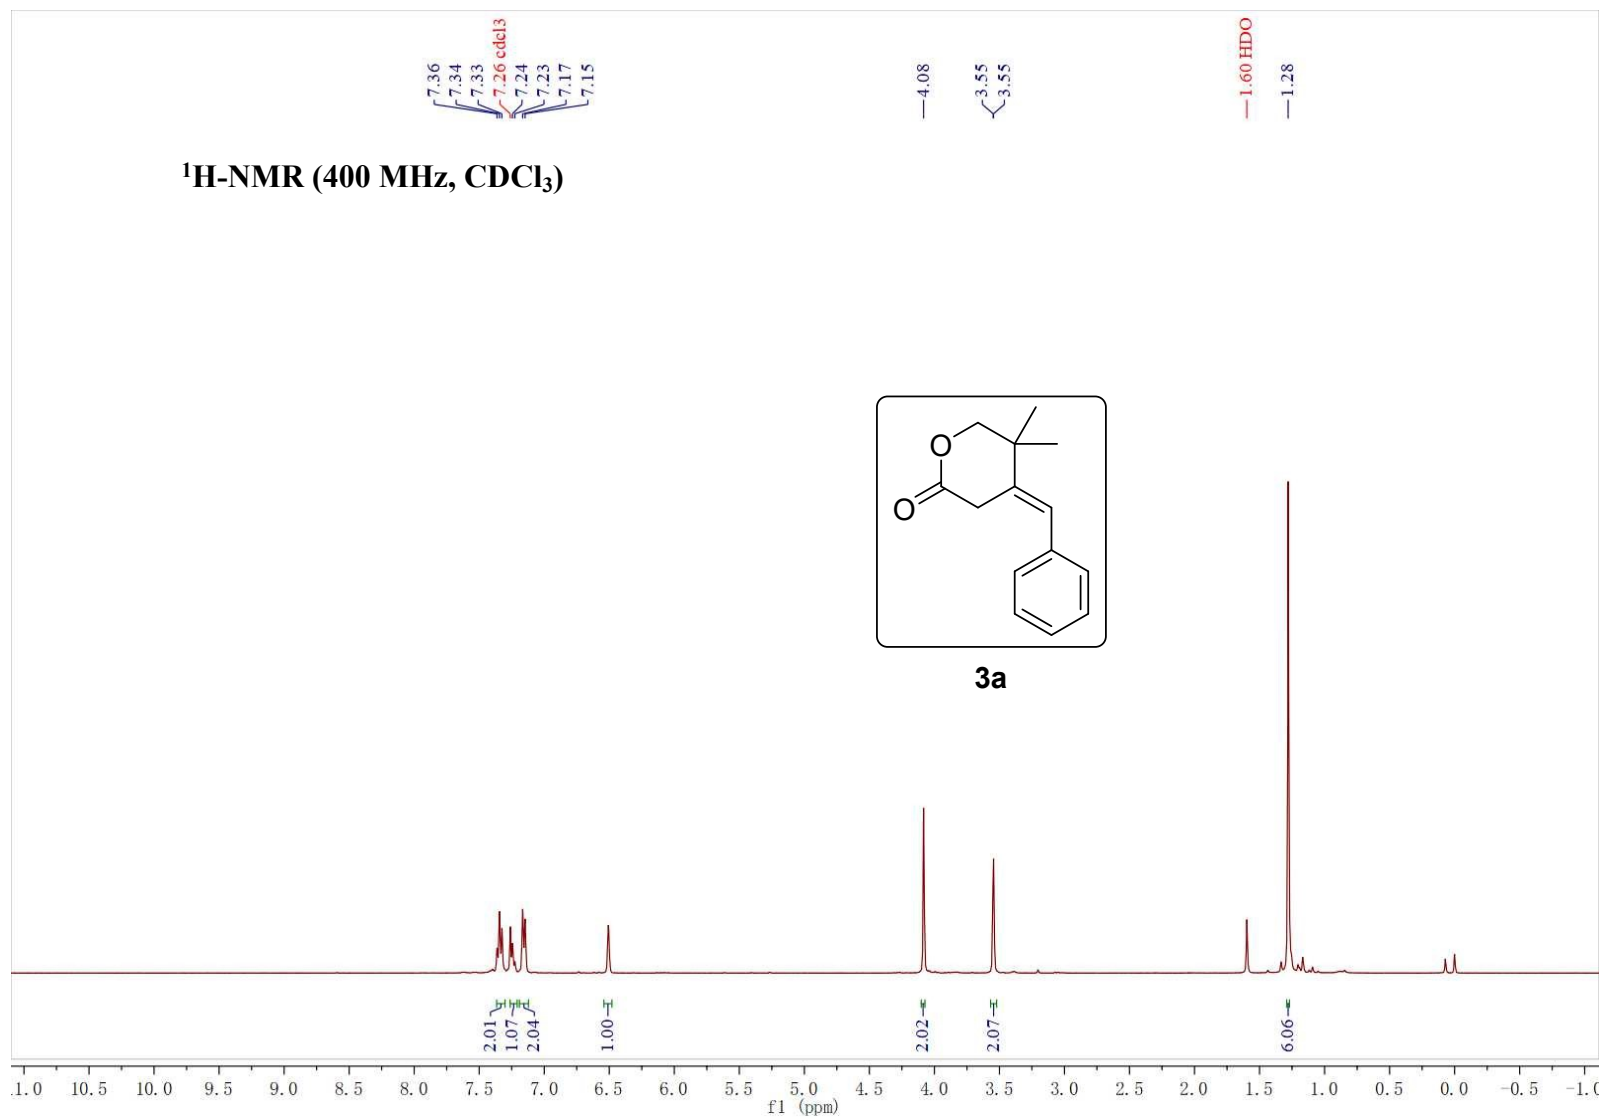

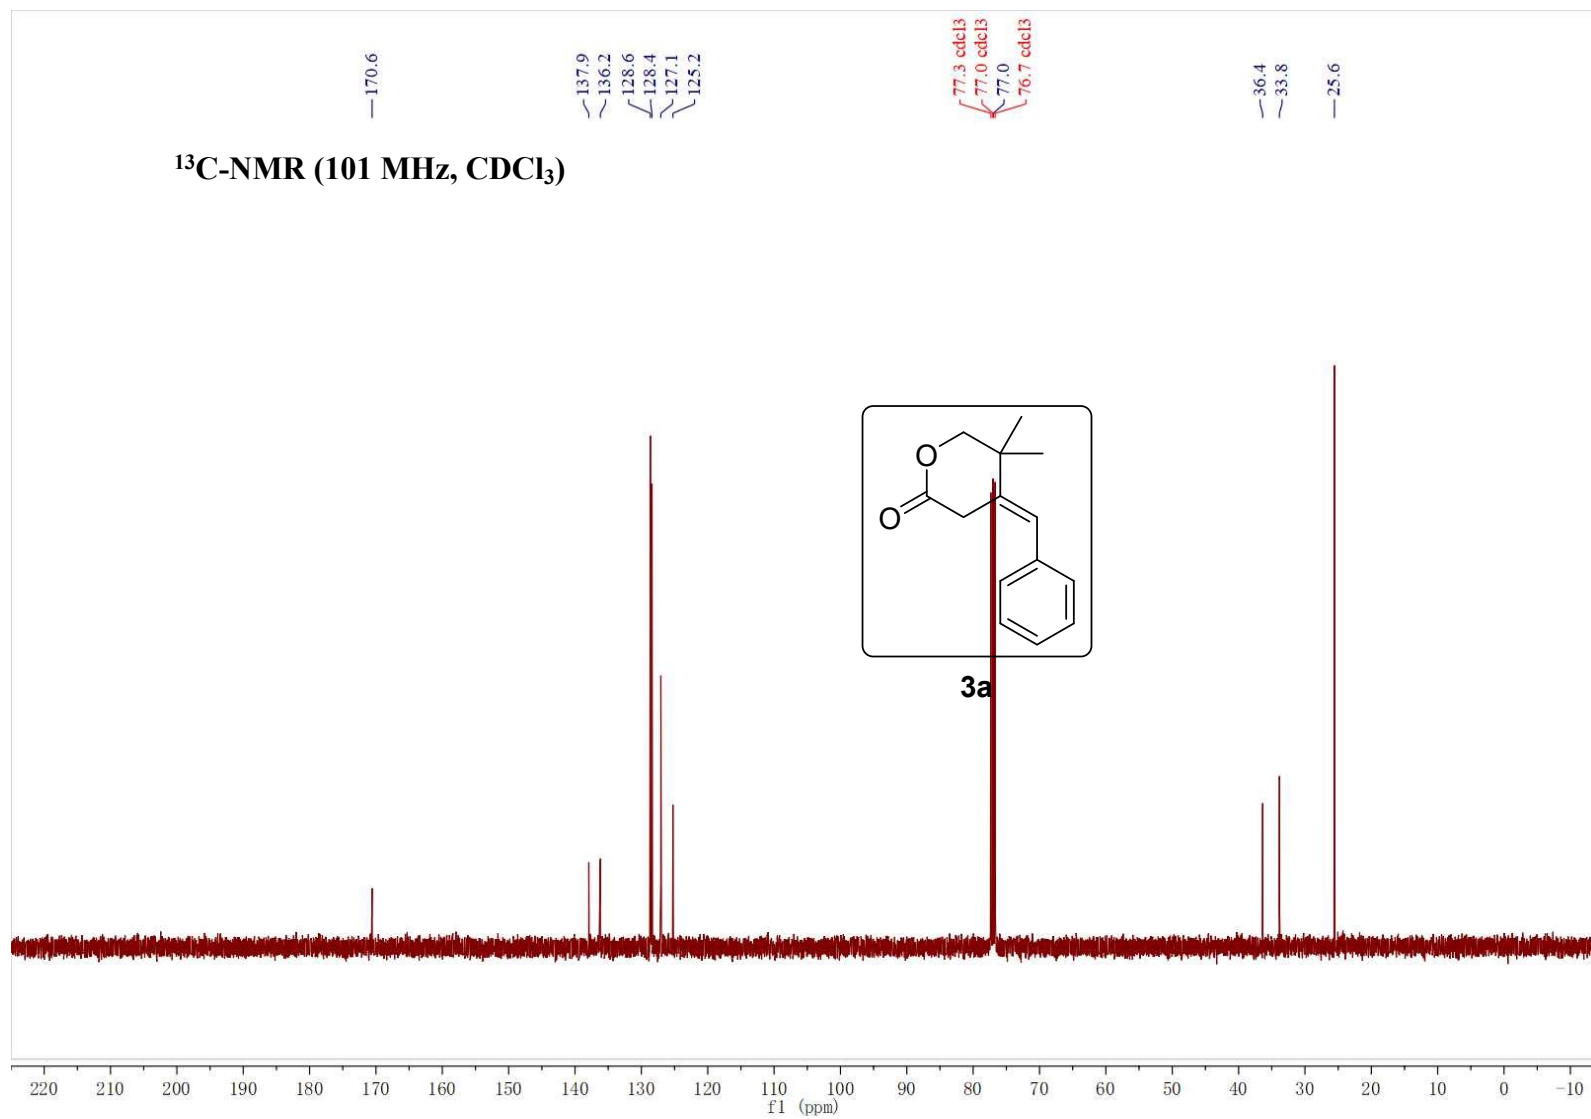

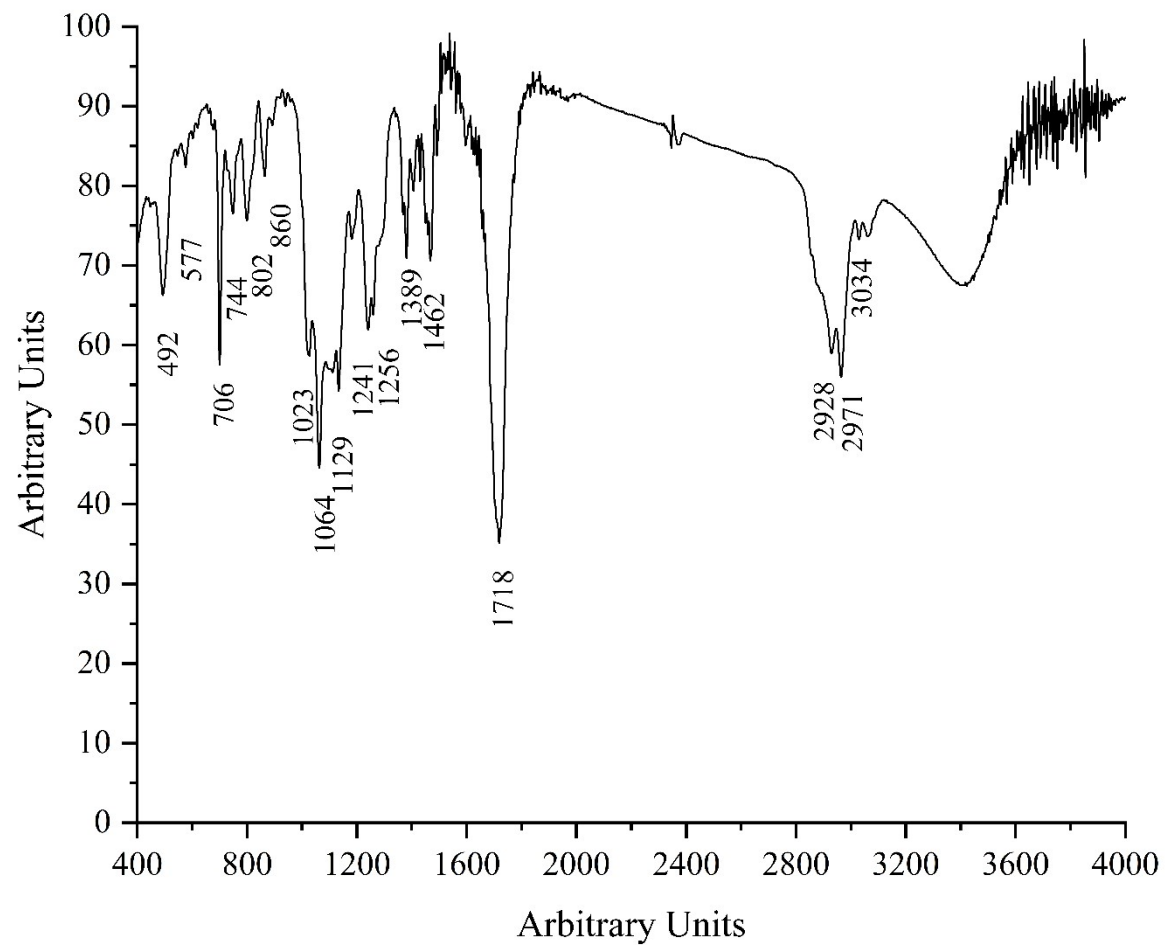

**<sup>1</sup>H-NMR (400 MHz, CDCl<sub>3</sub>)**

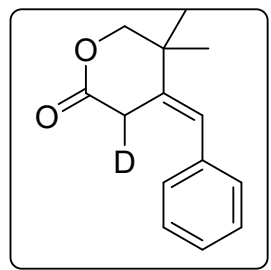

**3aD**

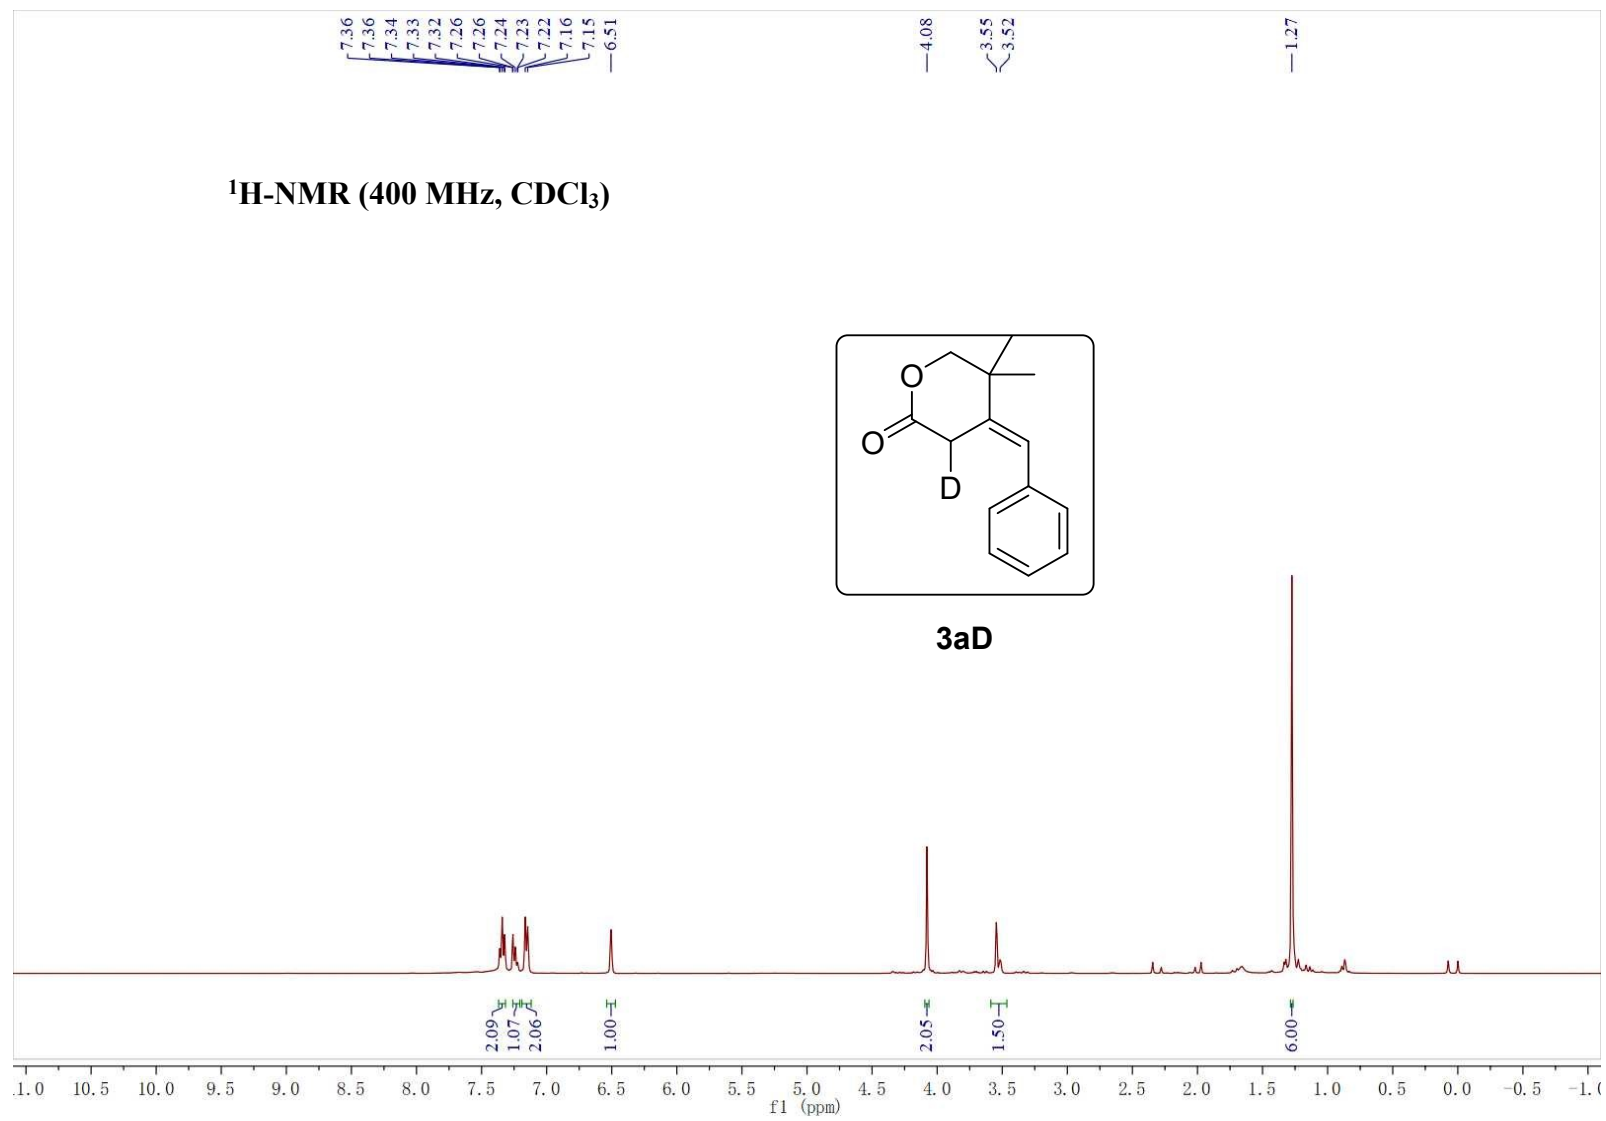

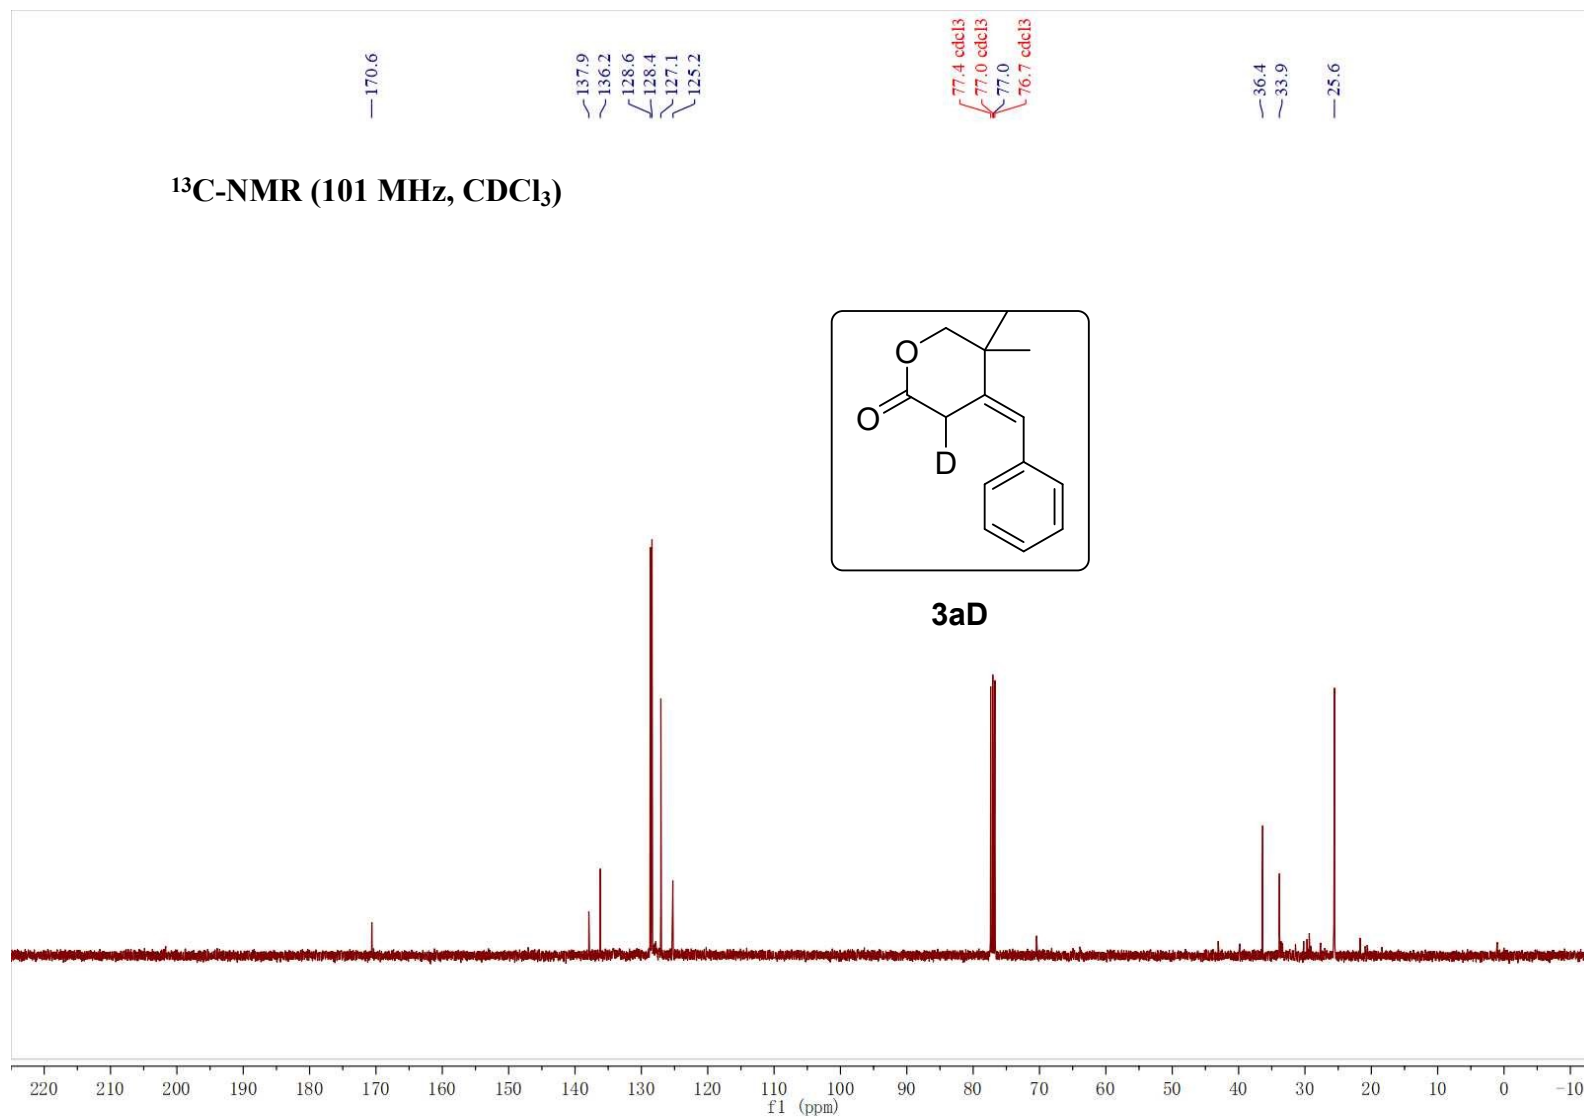

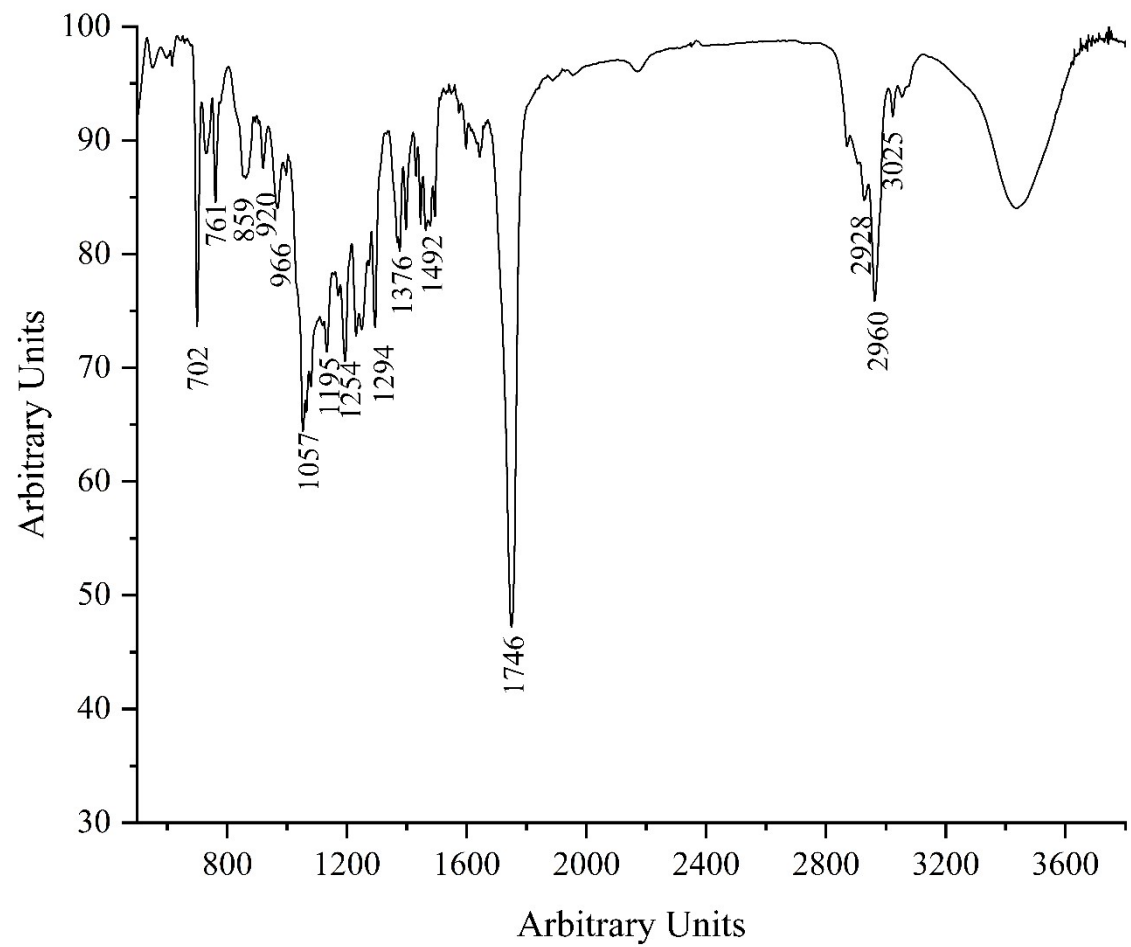



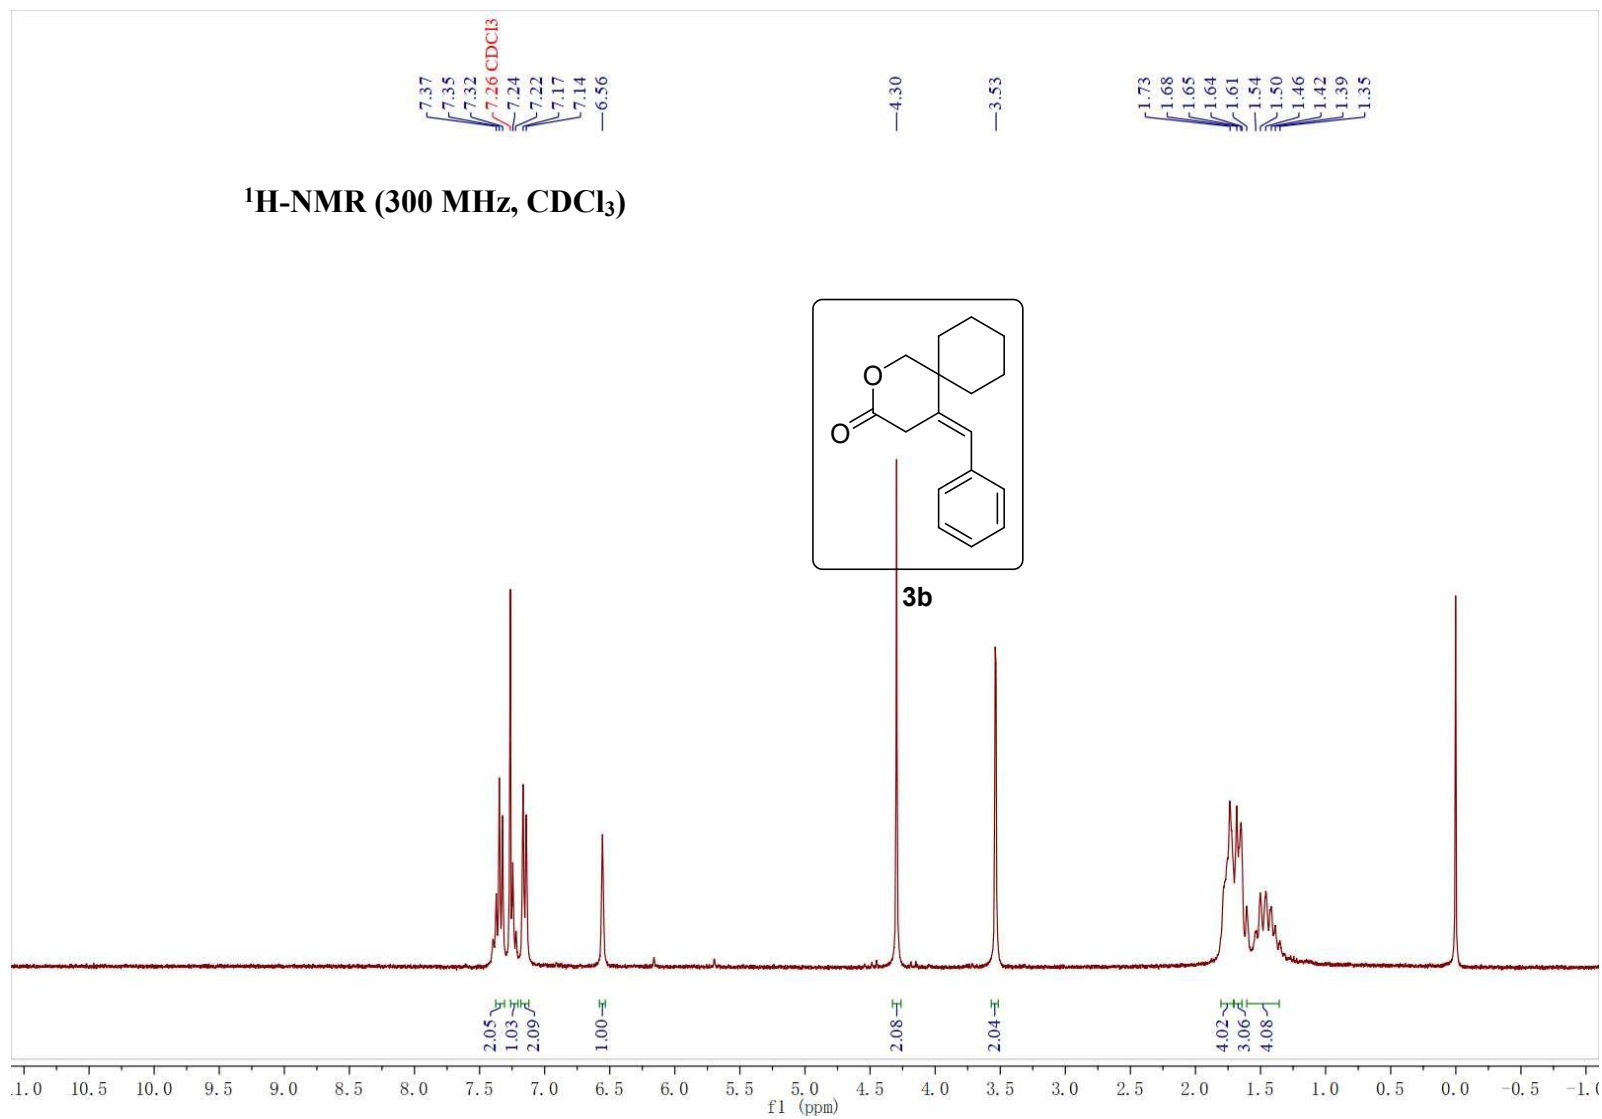

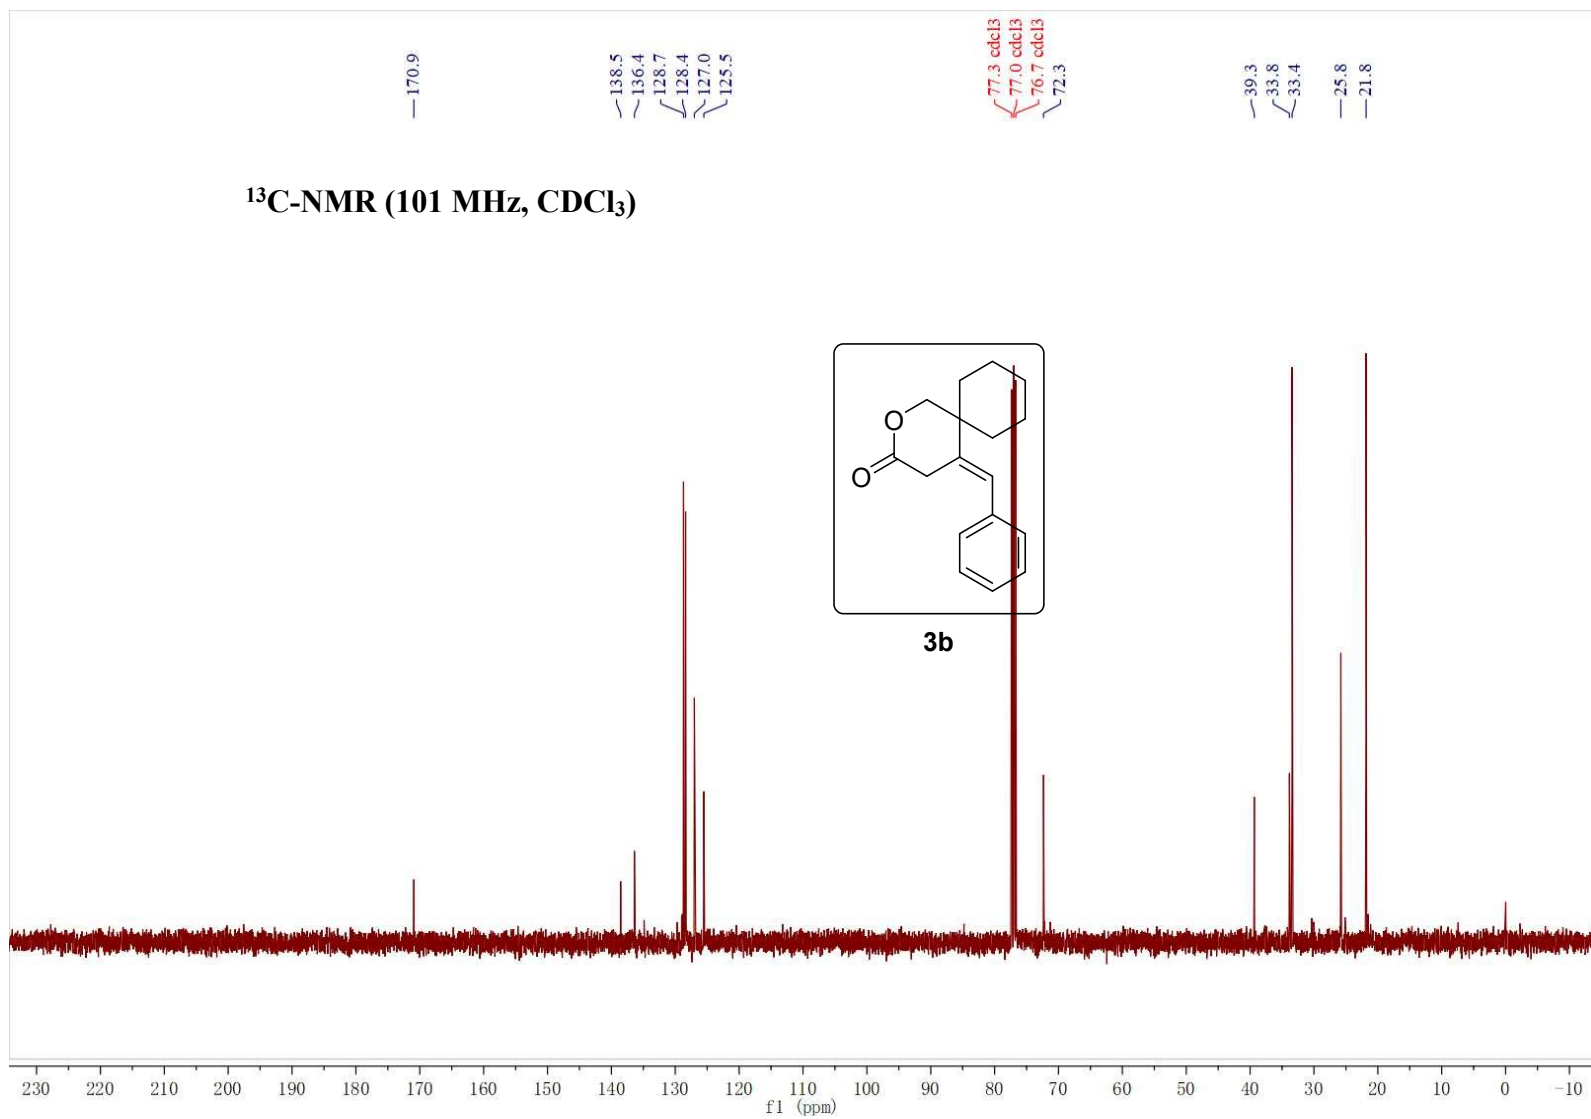

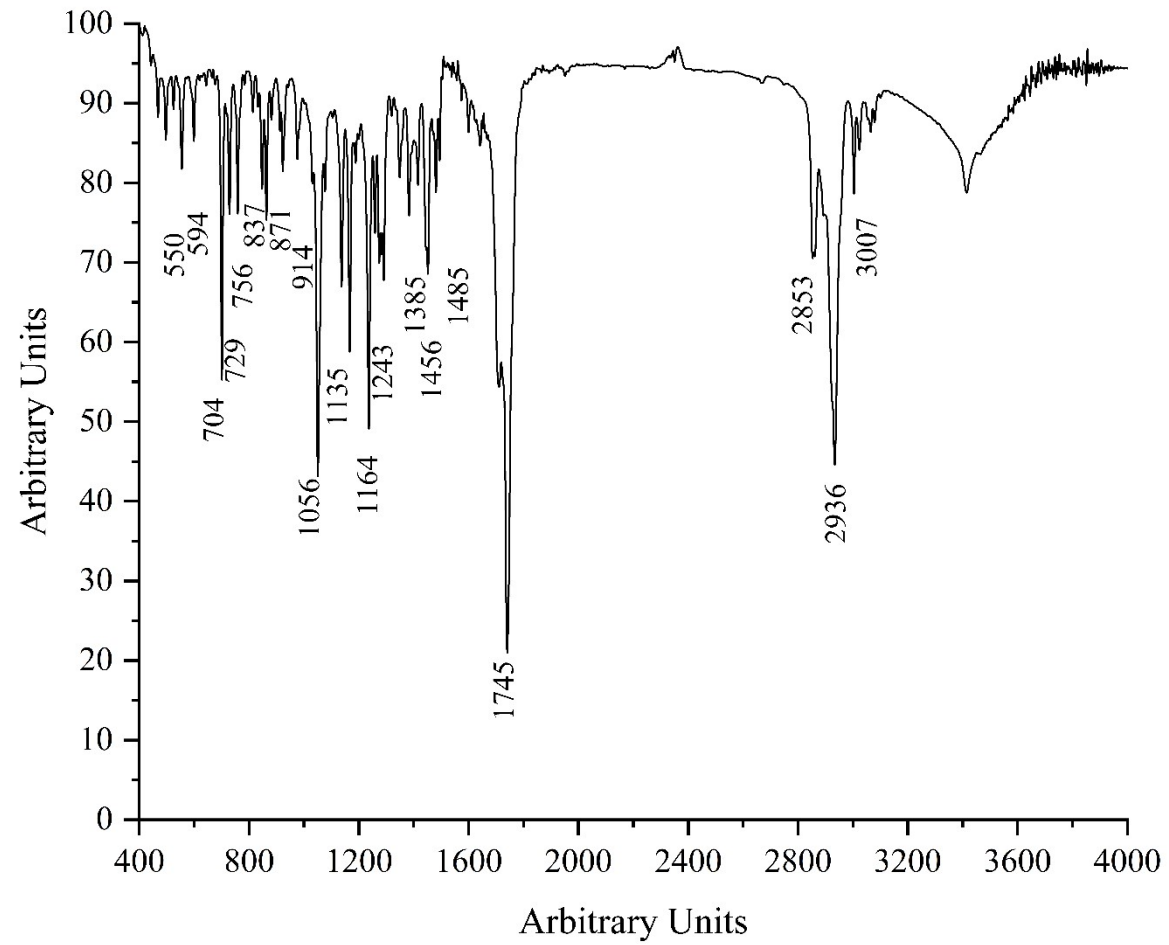

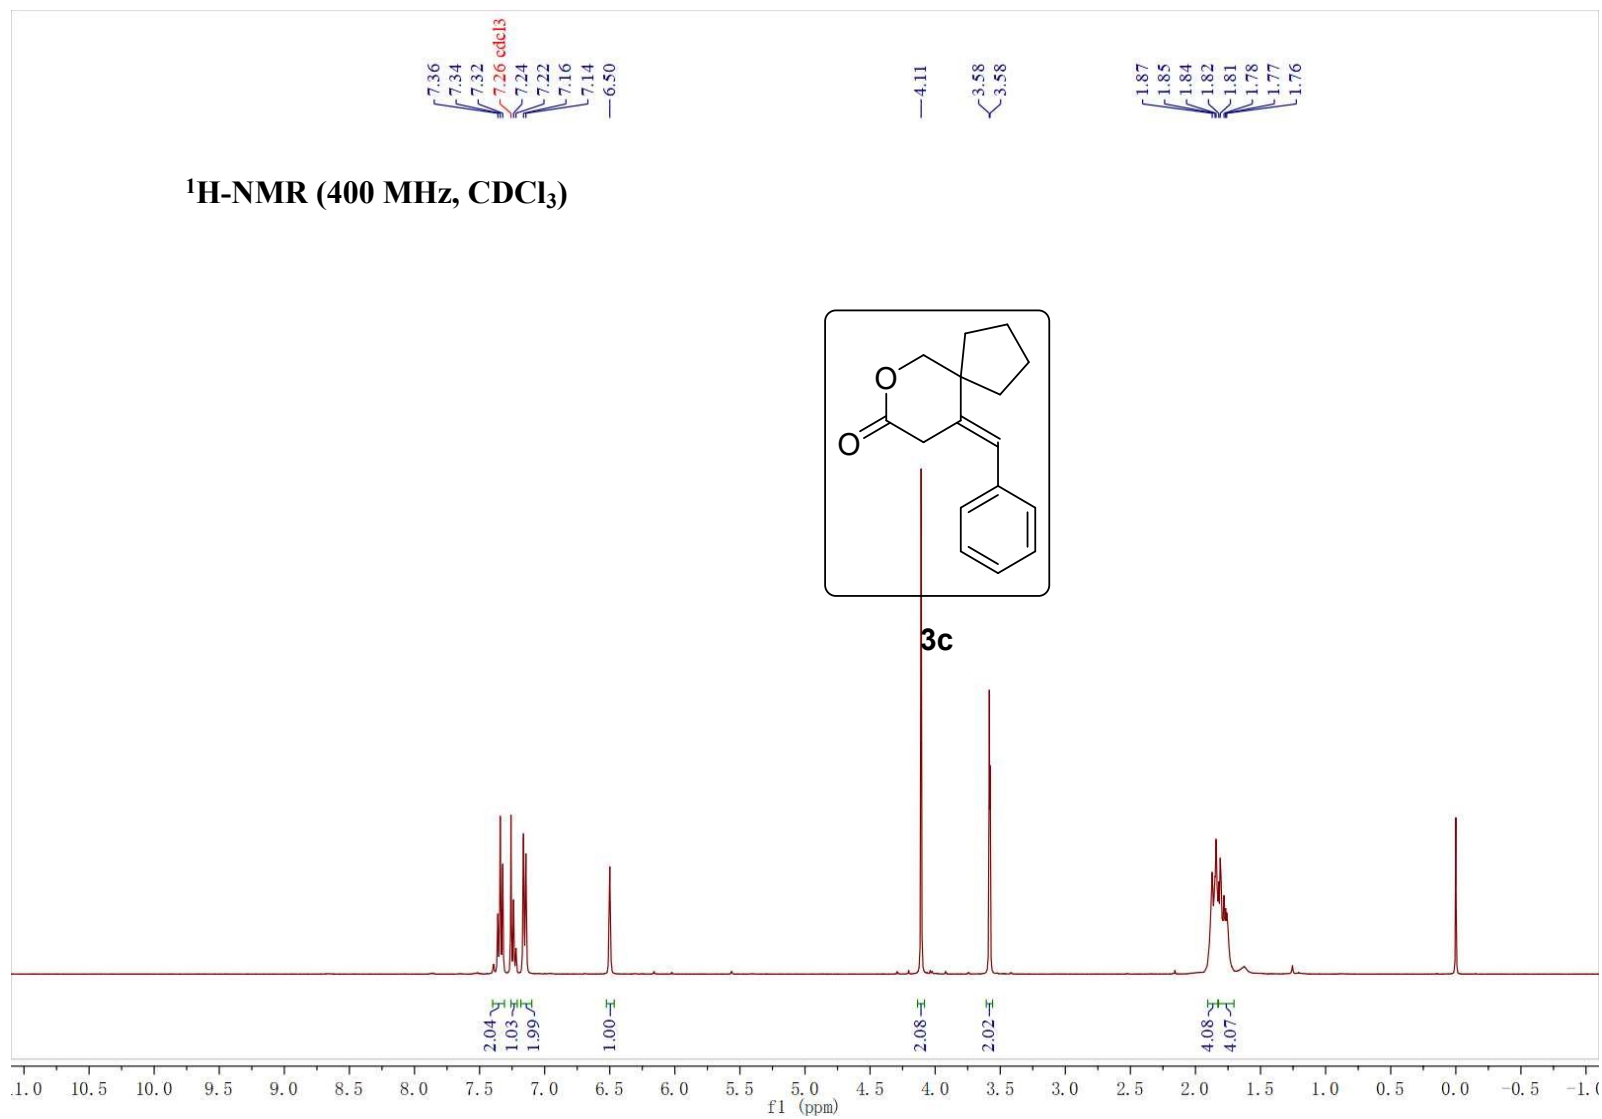

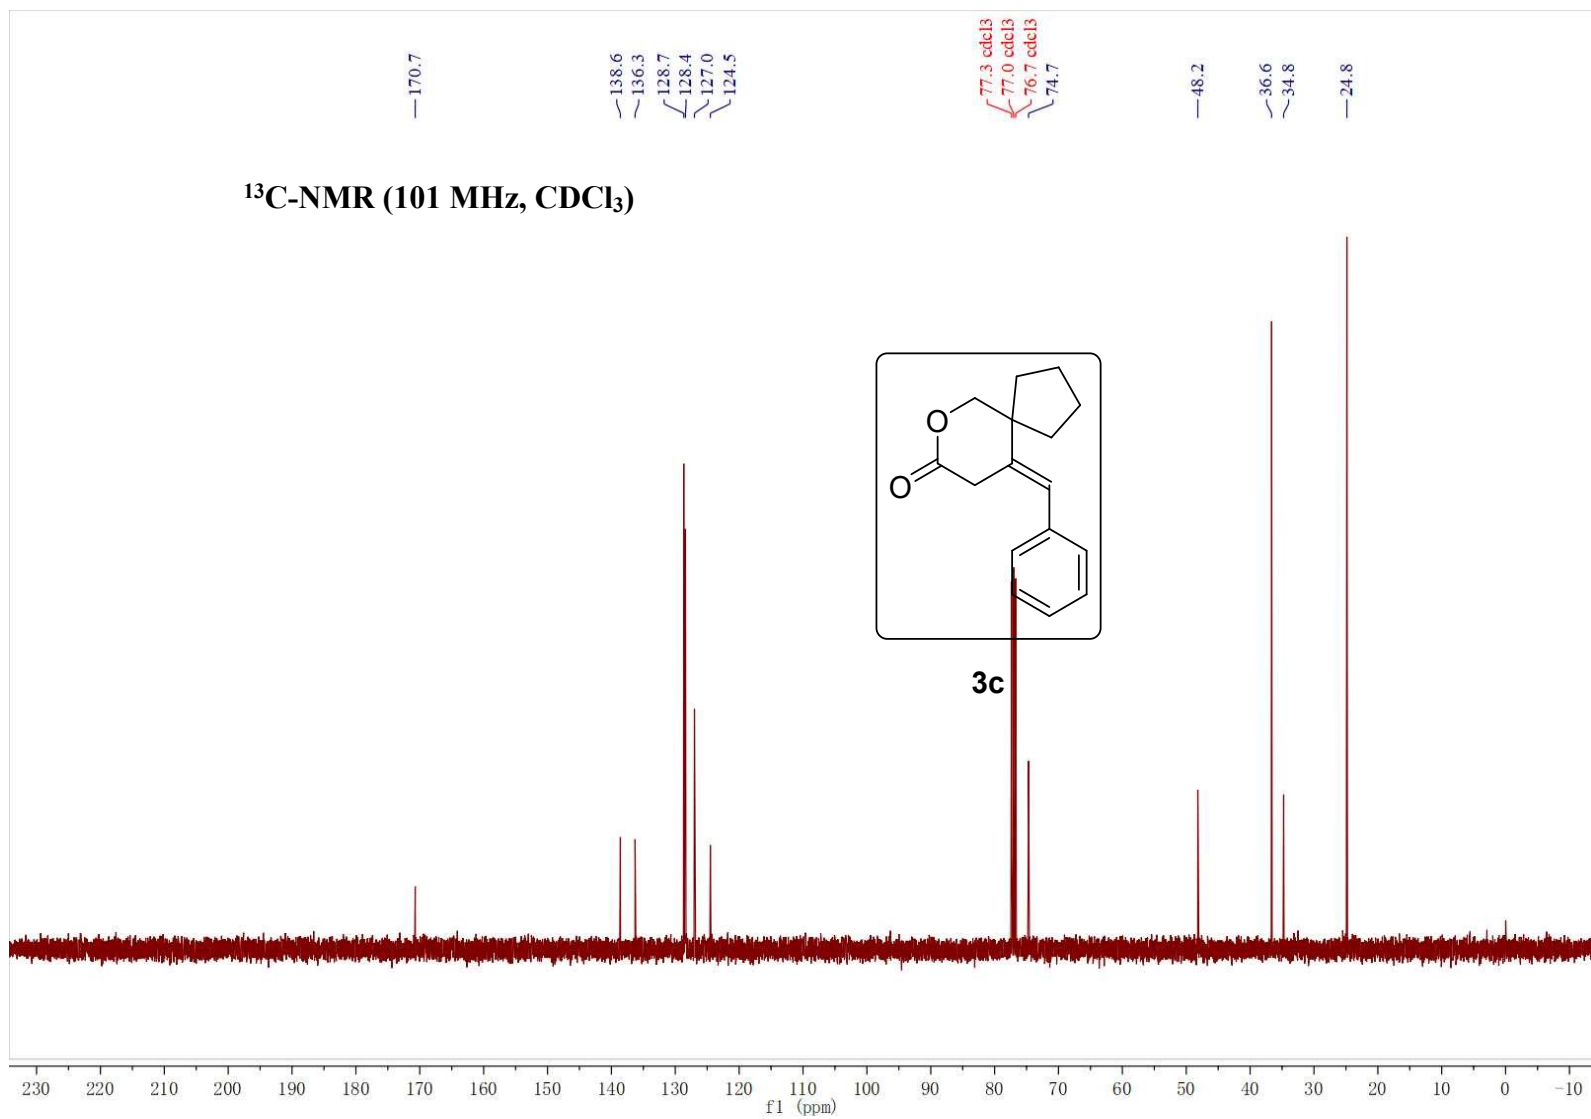

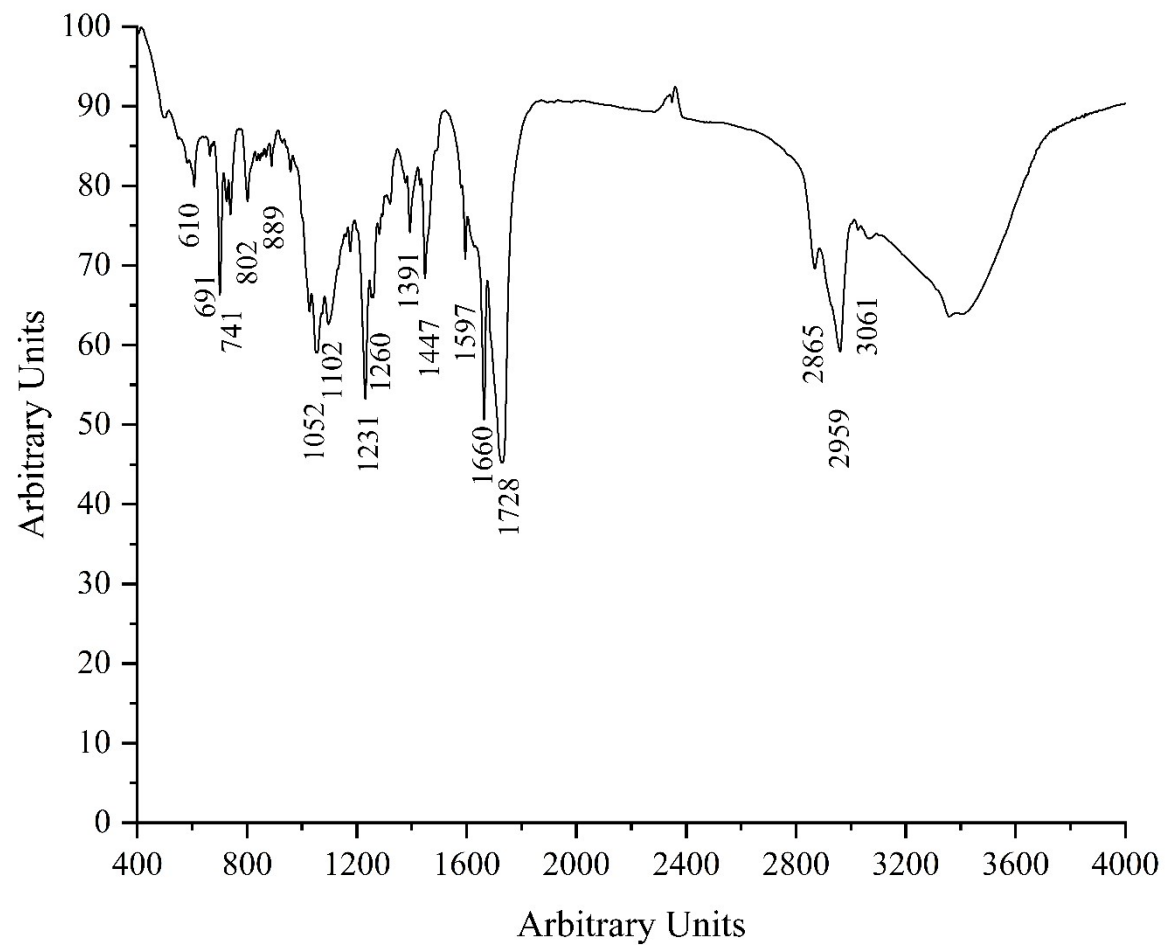

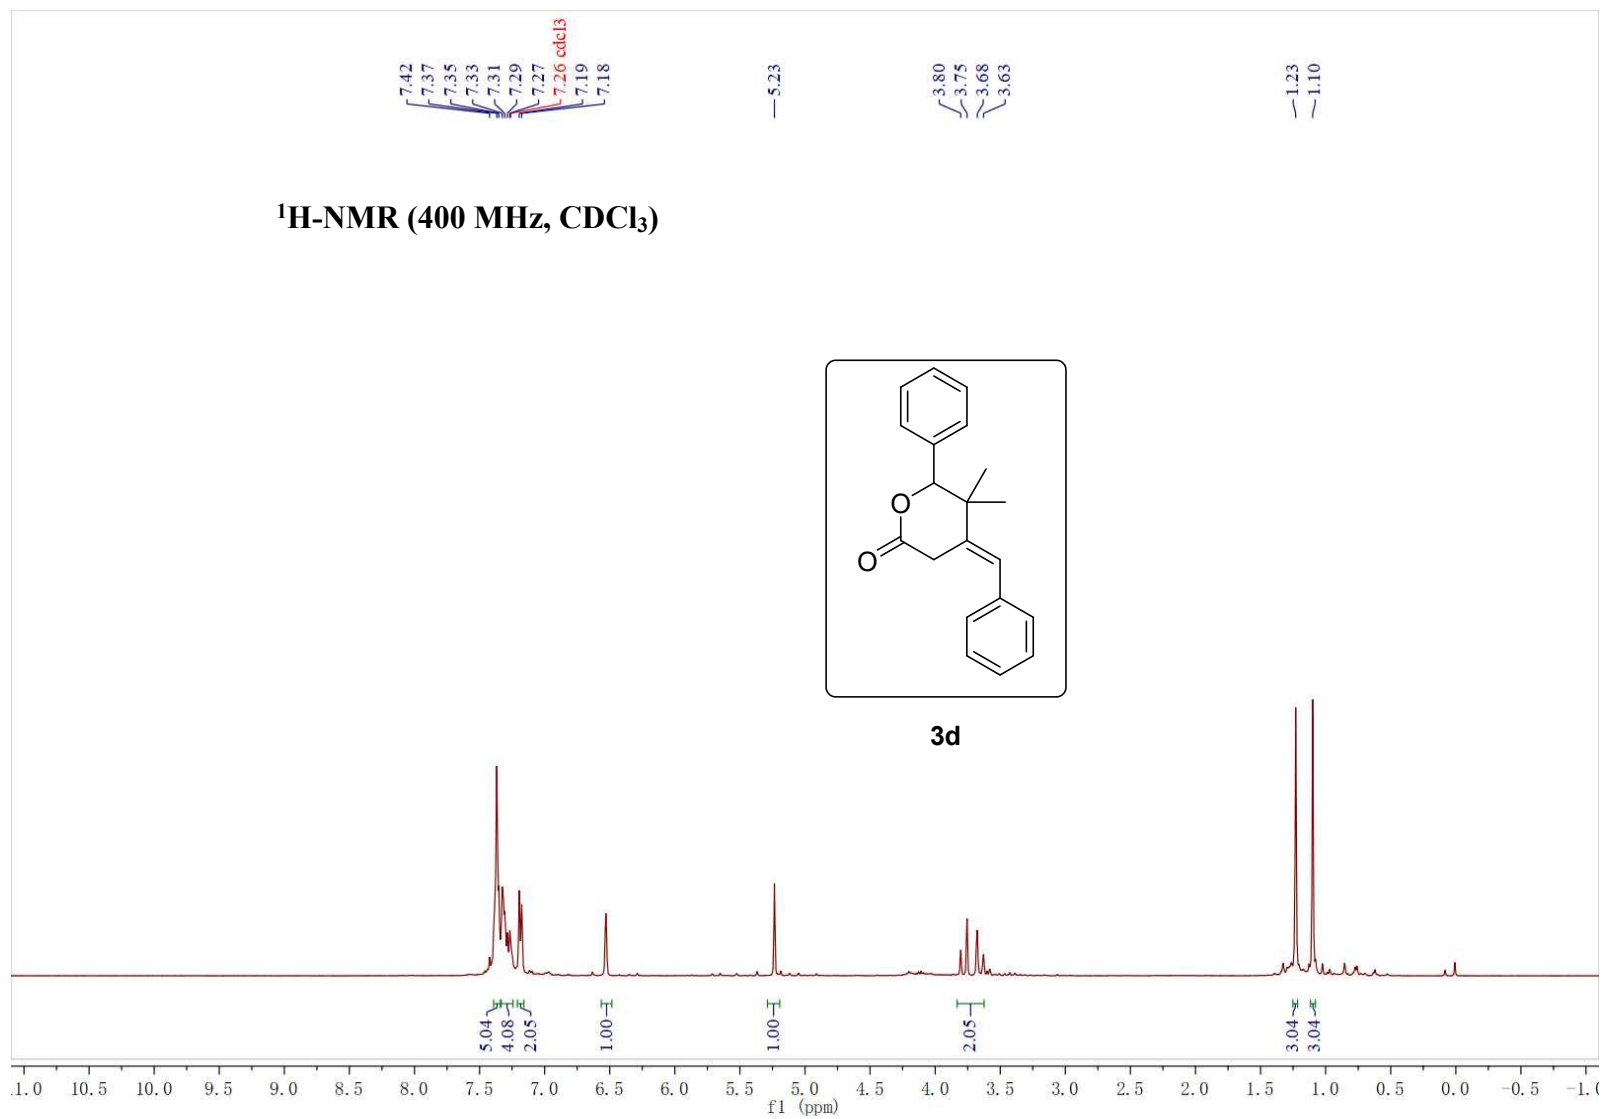

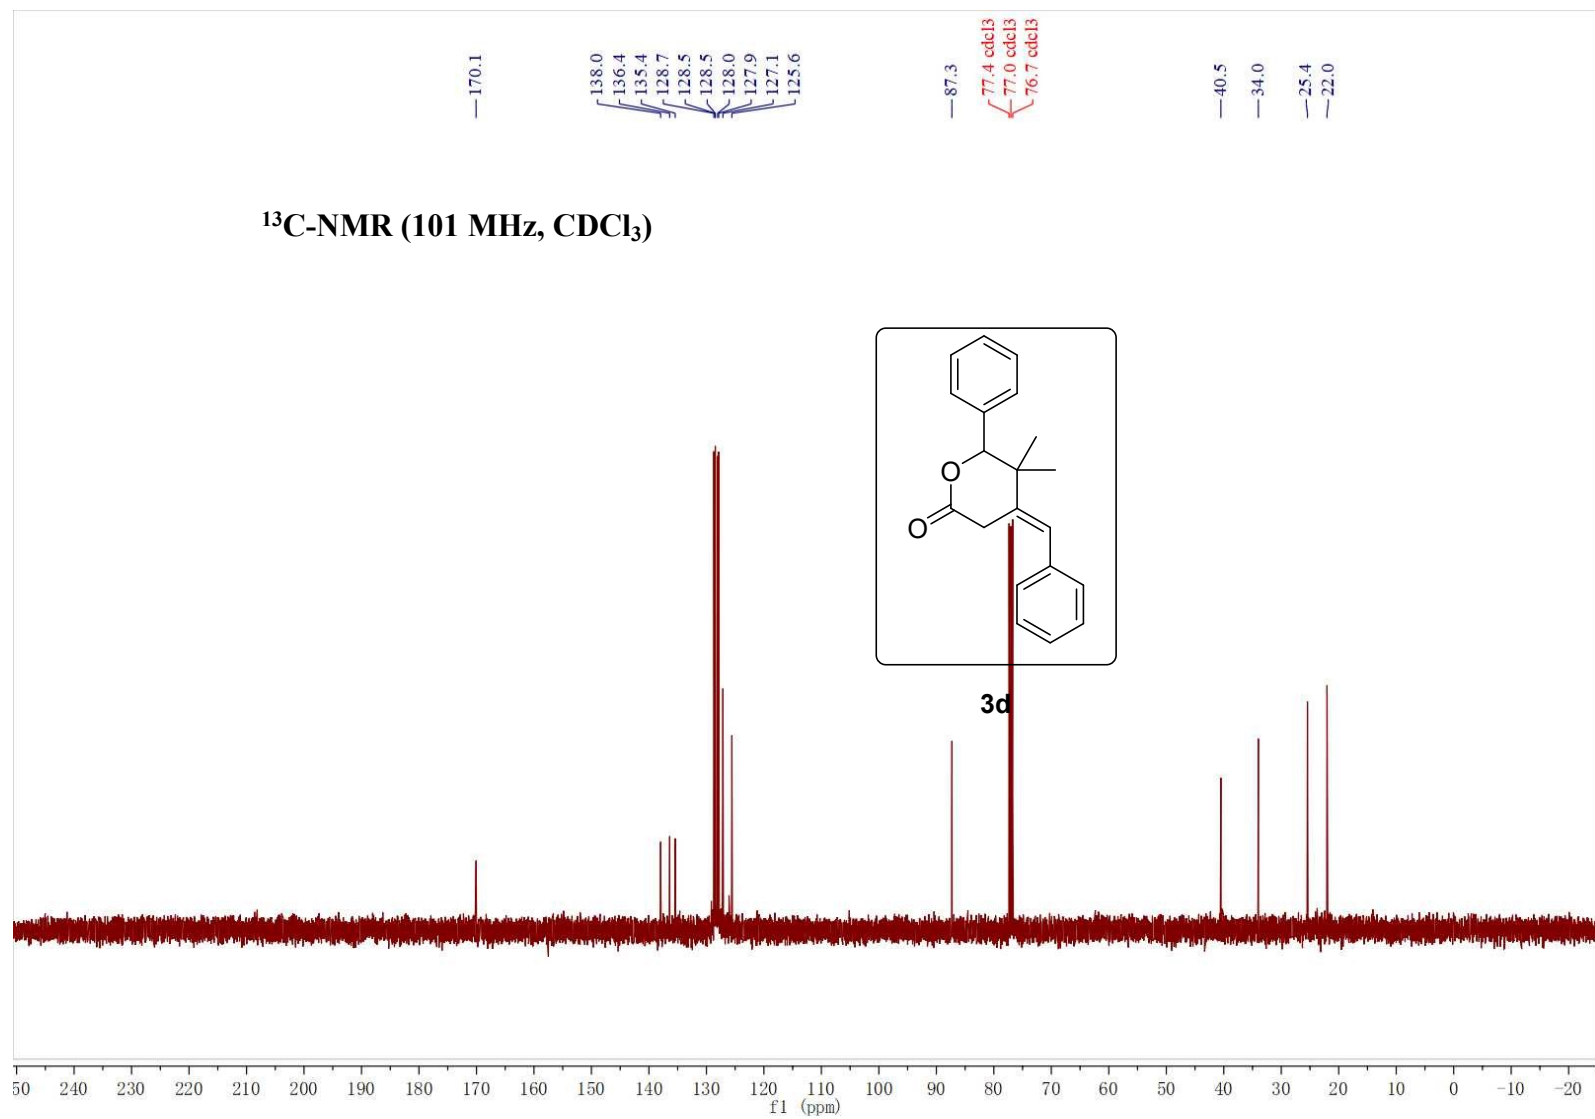



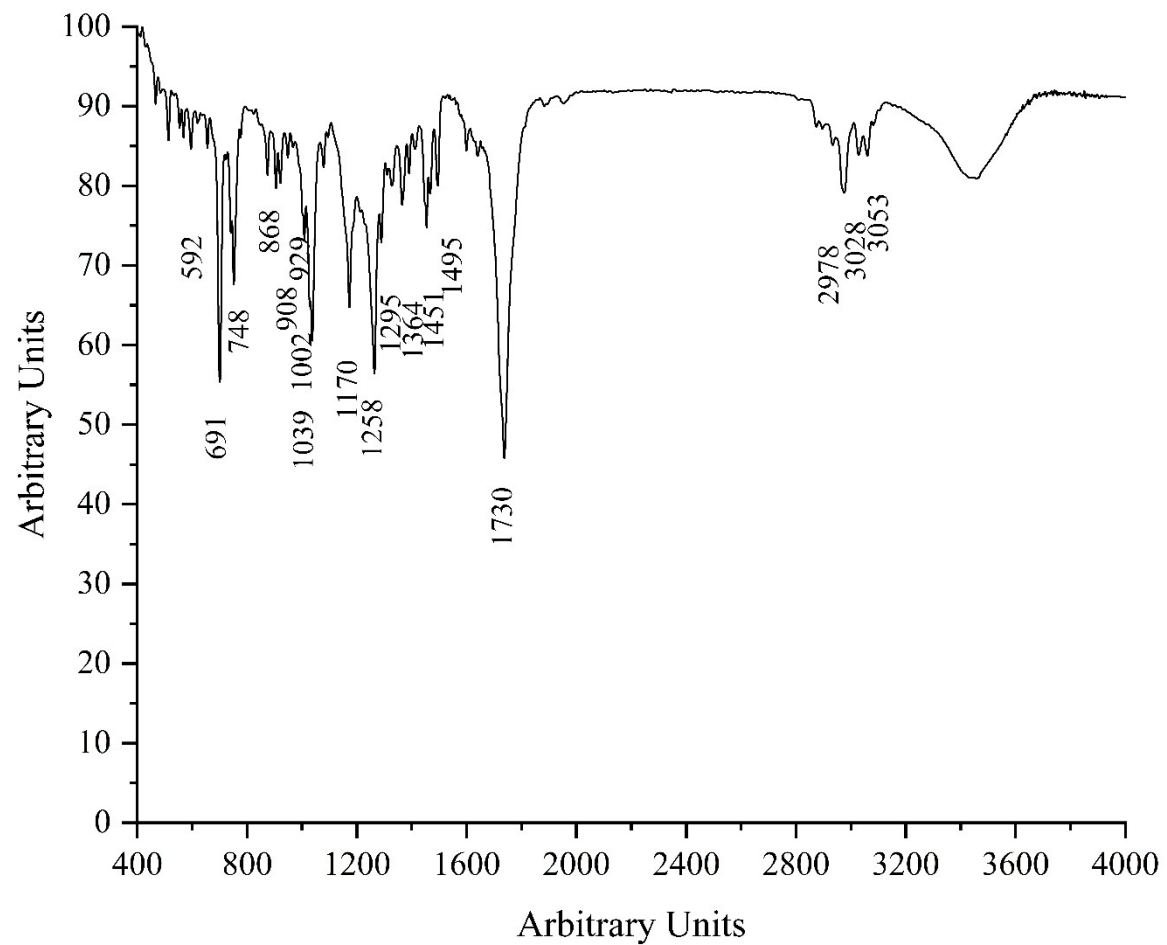

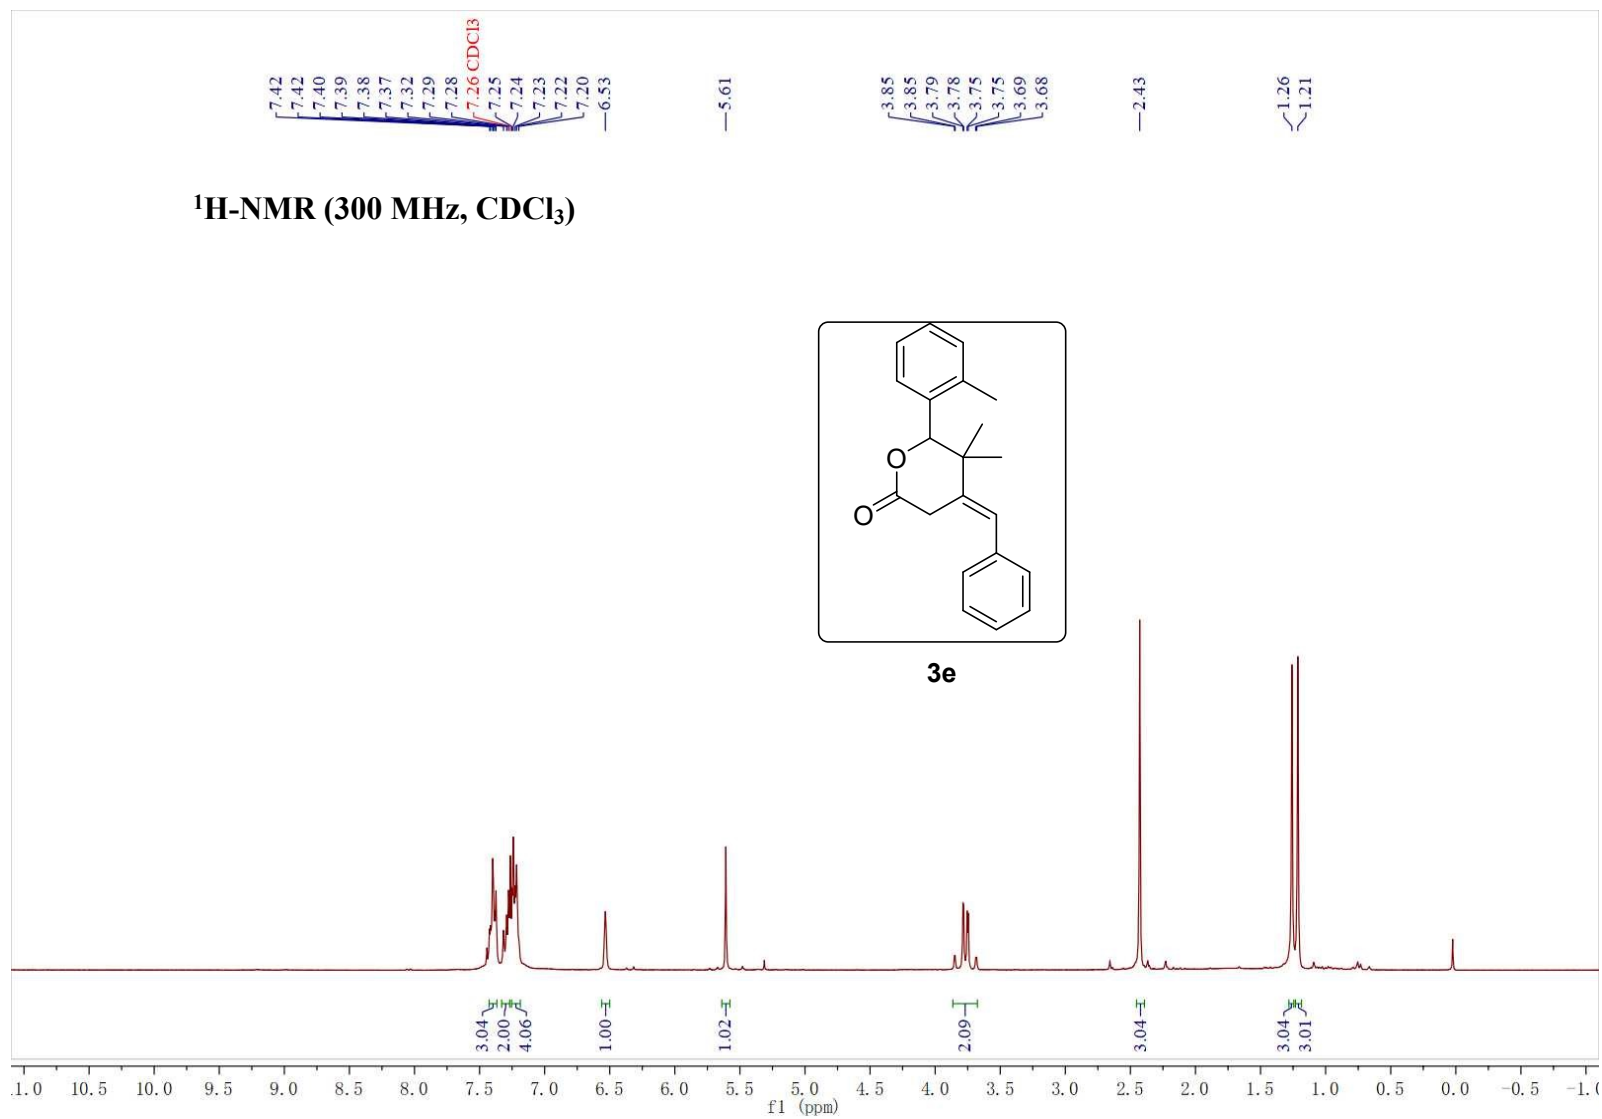

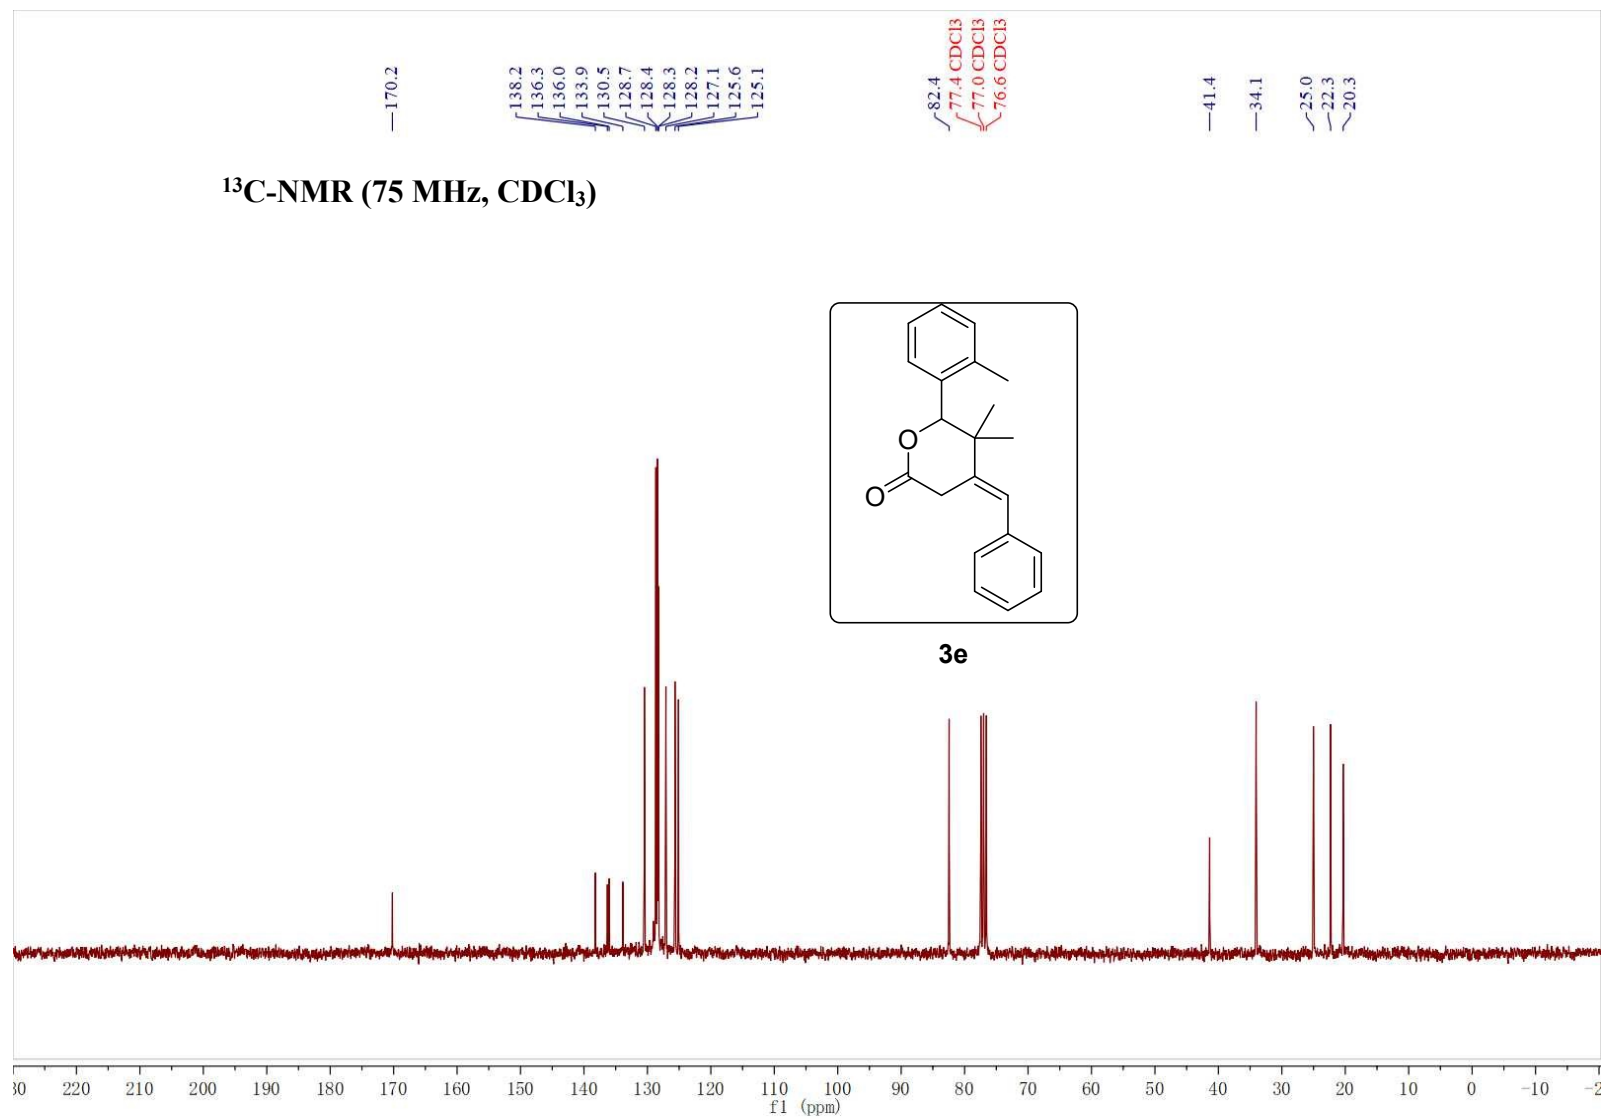

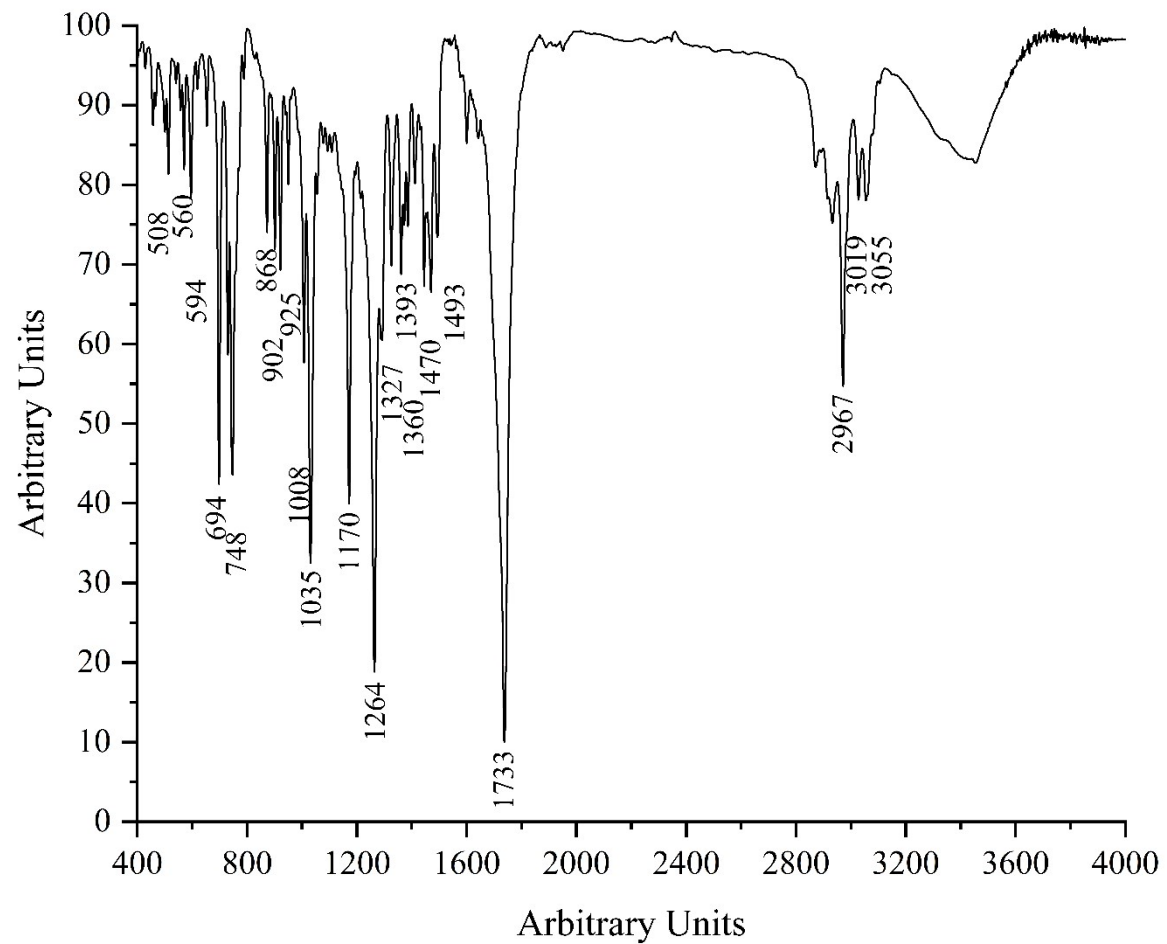

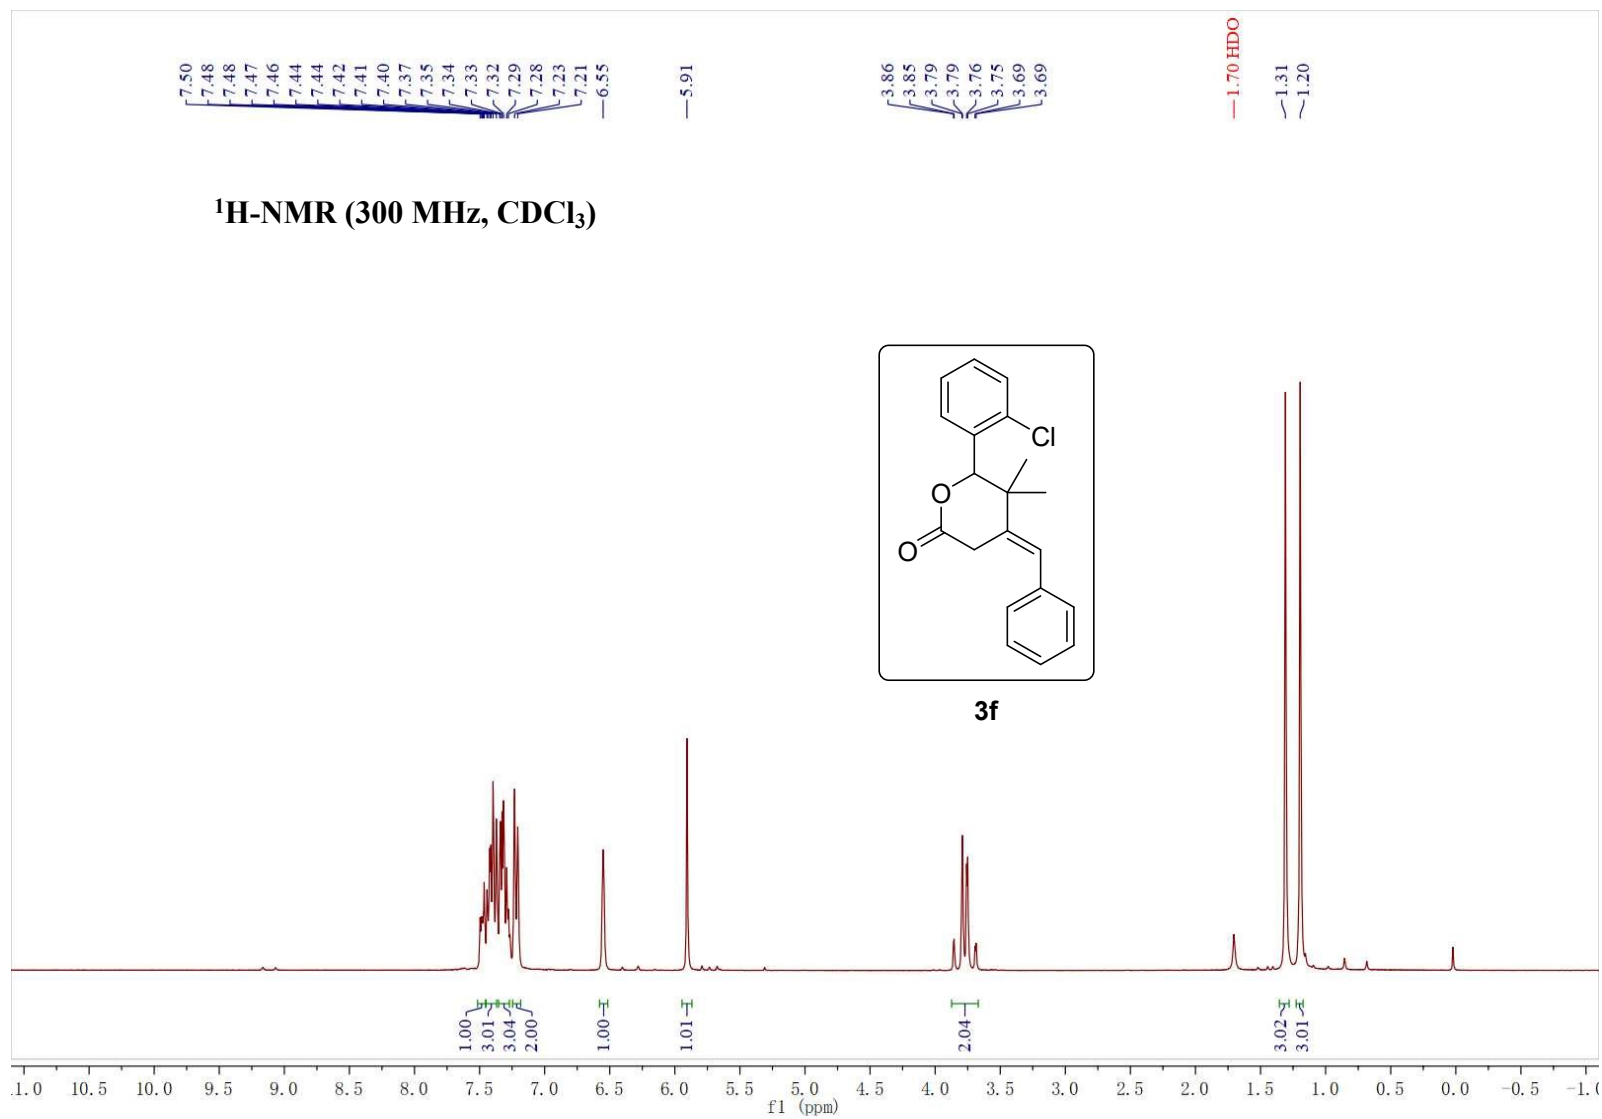

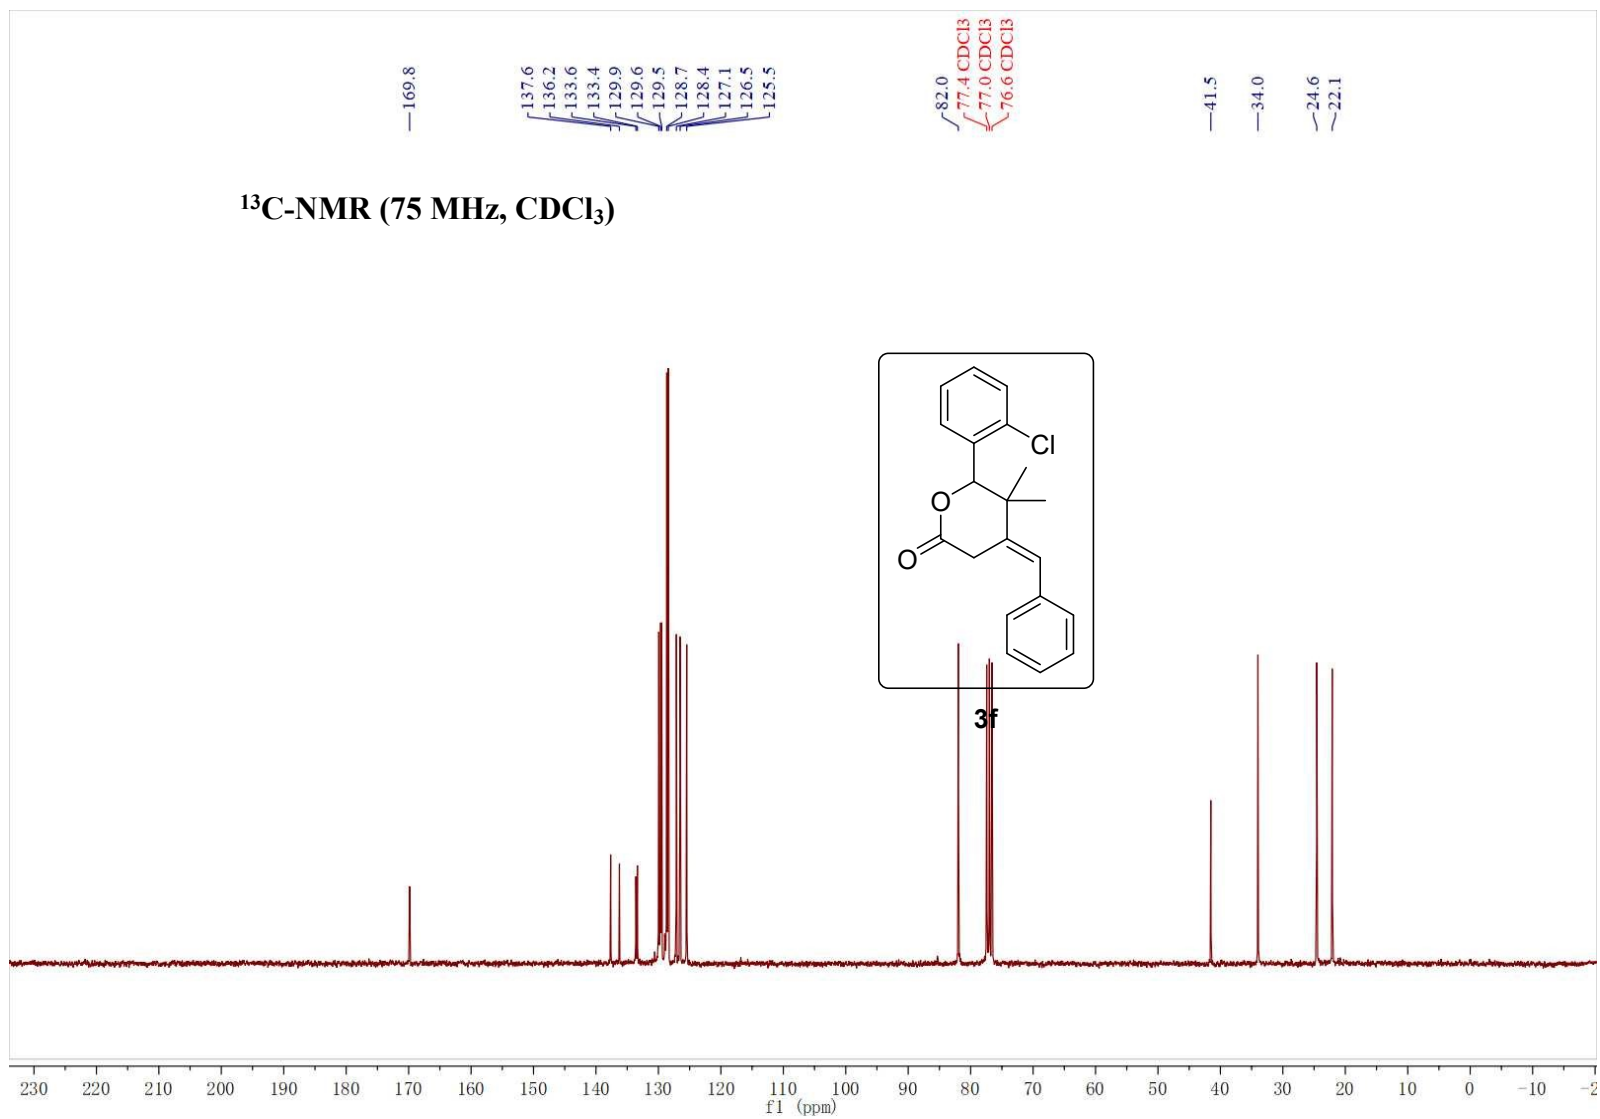

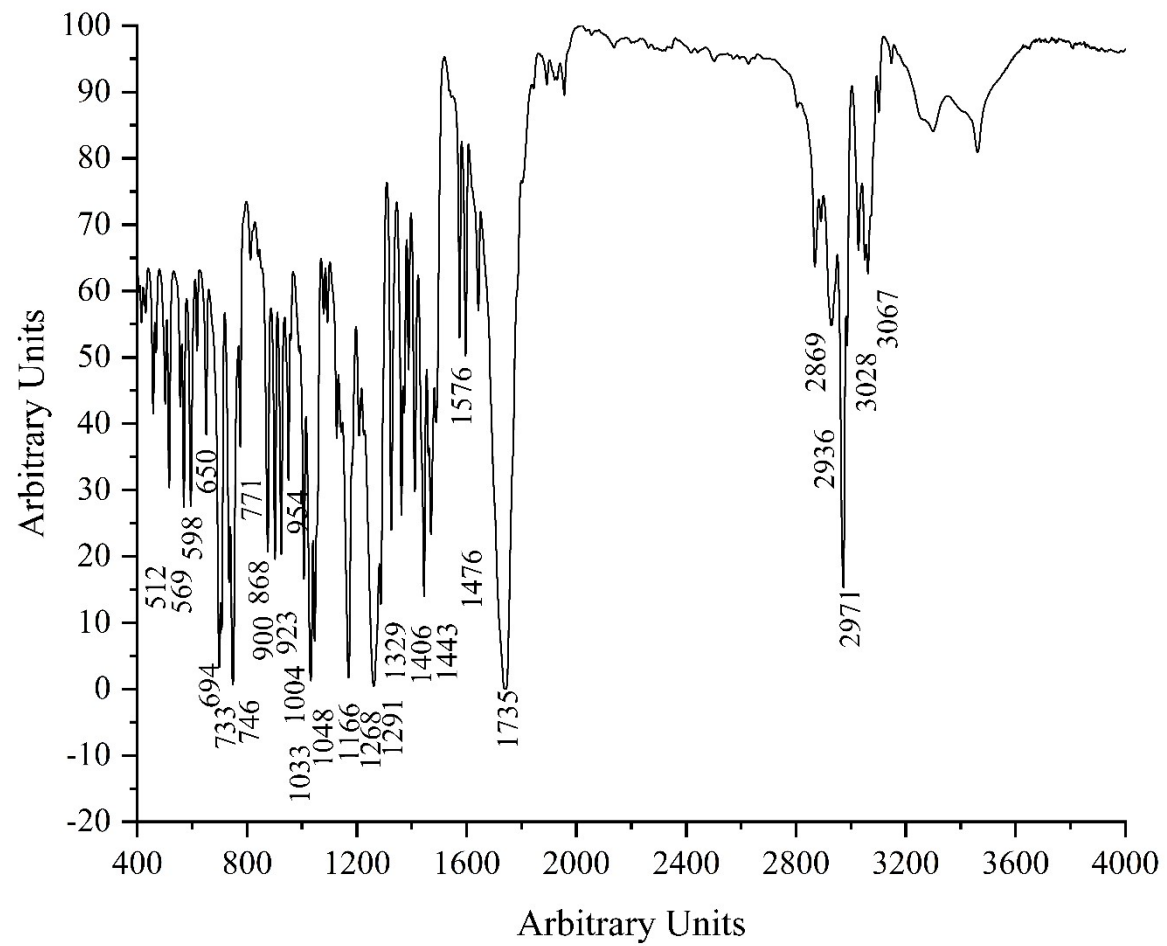

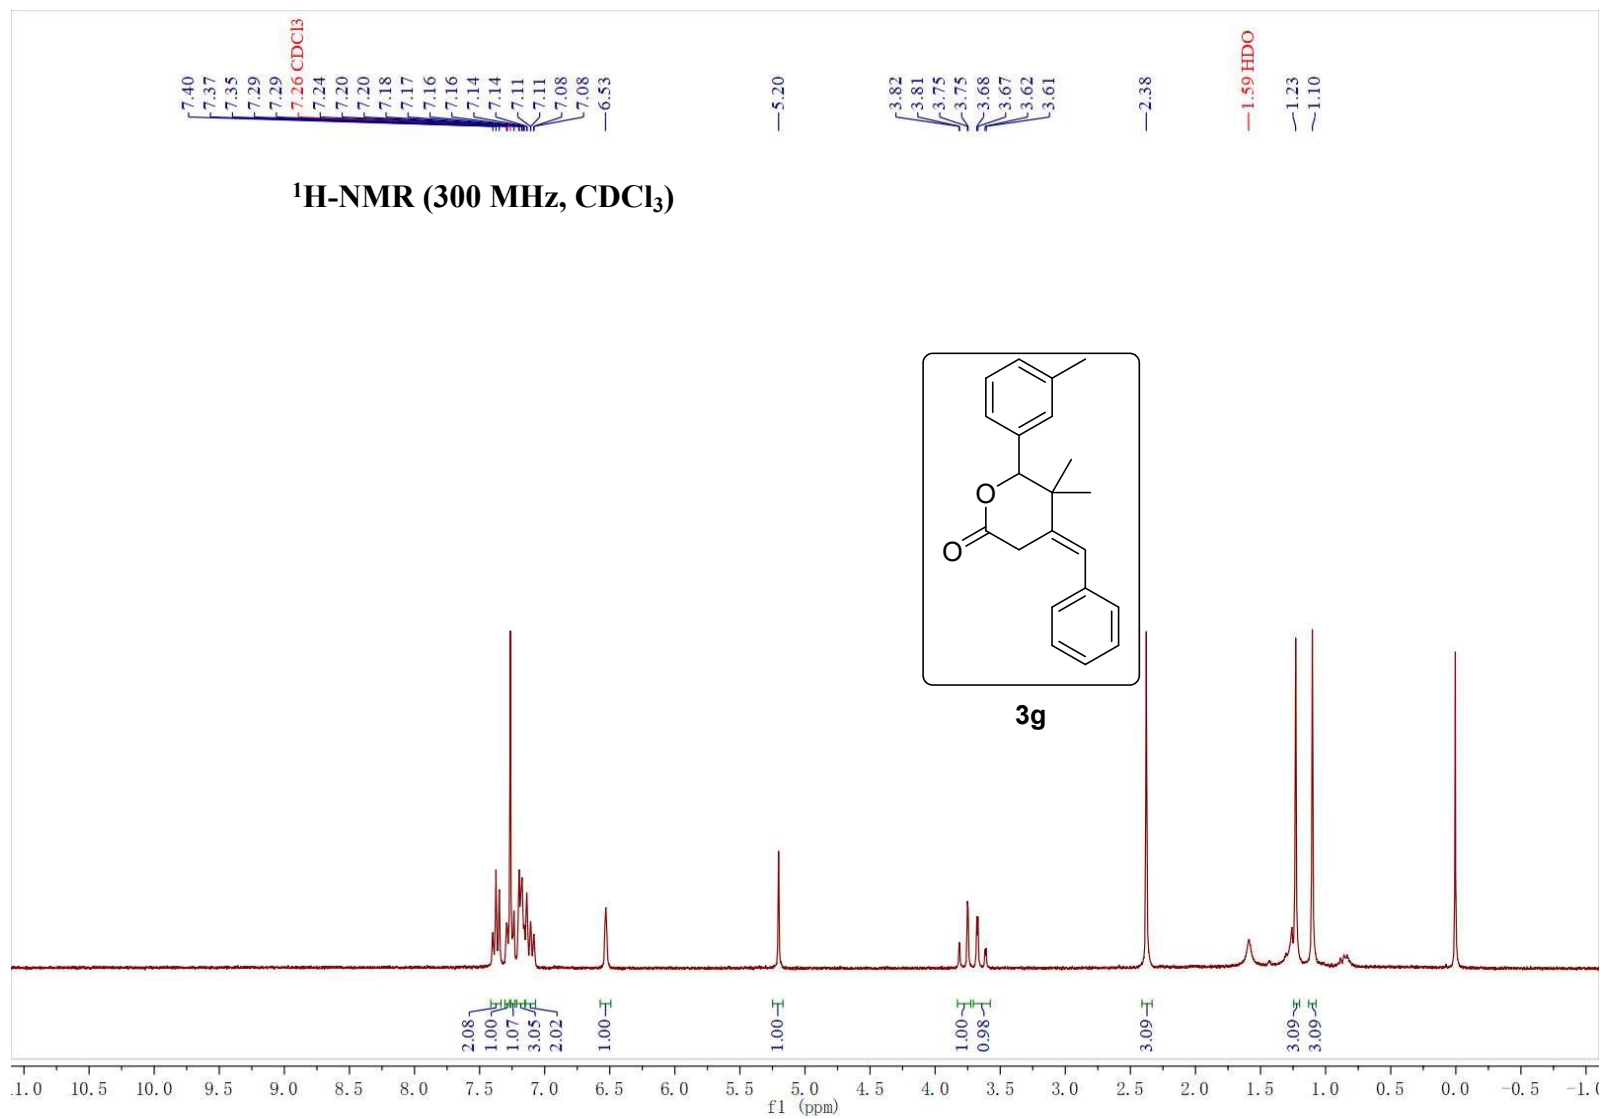



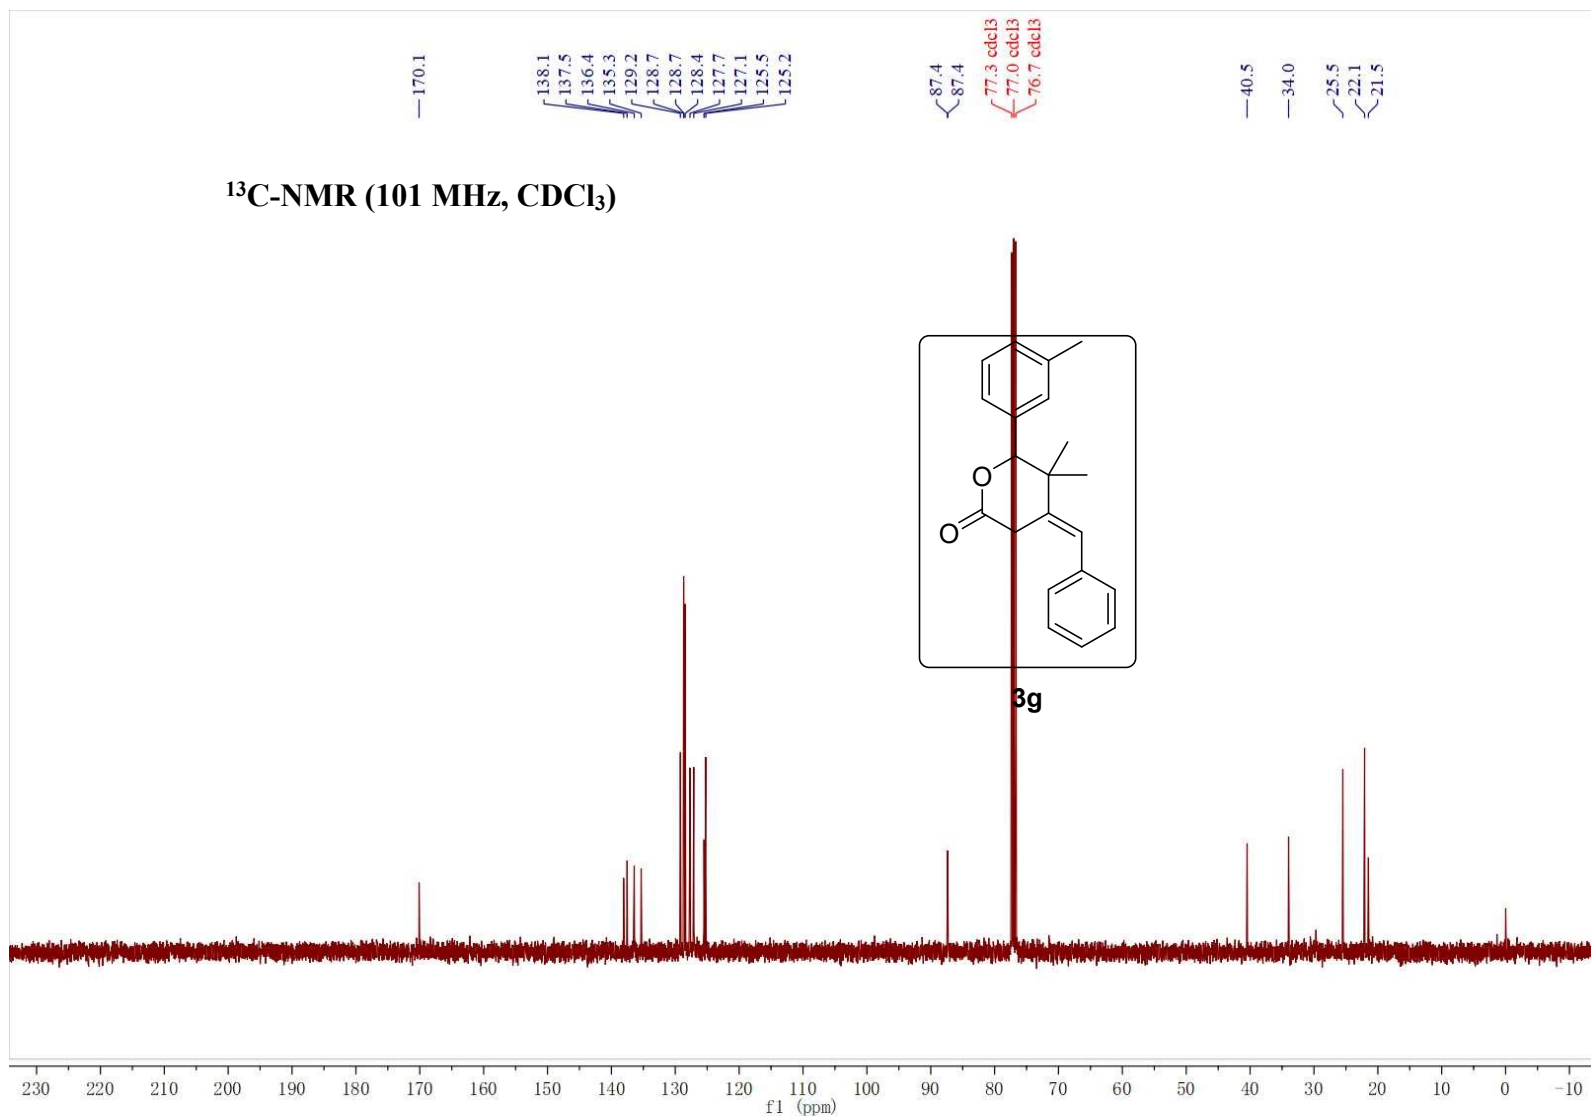

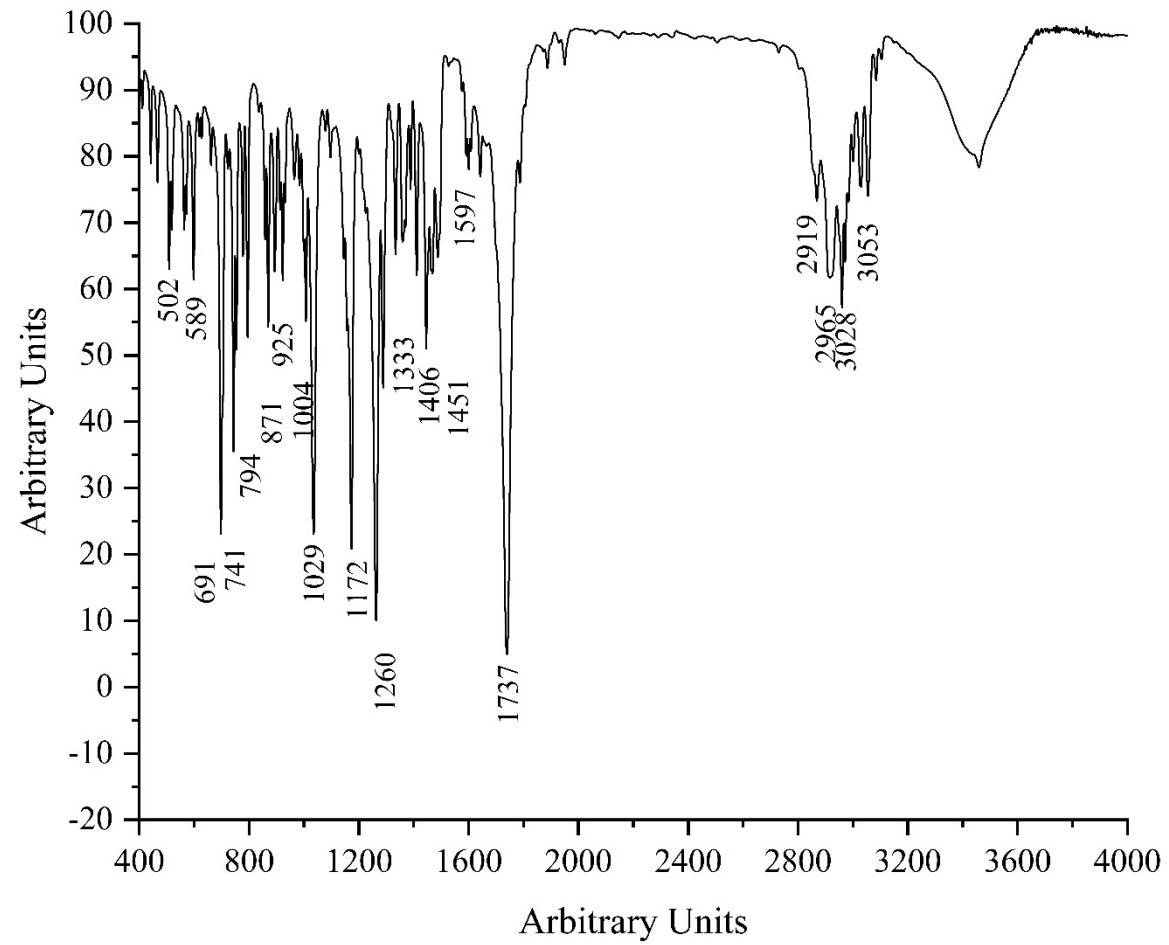

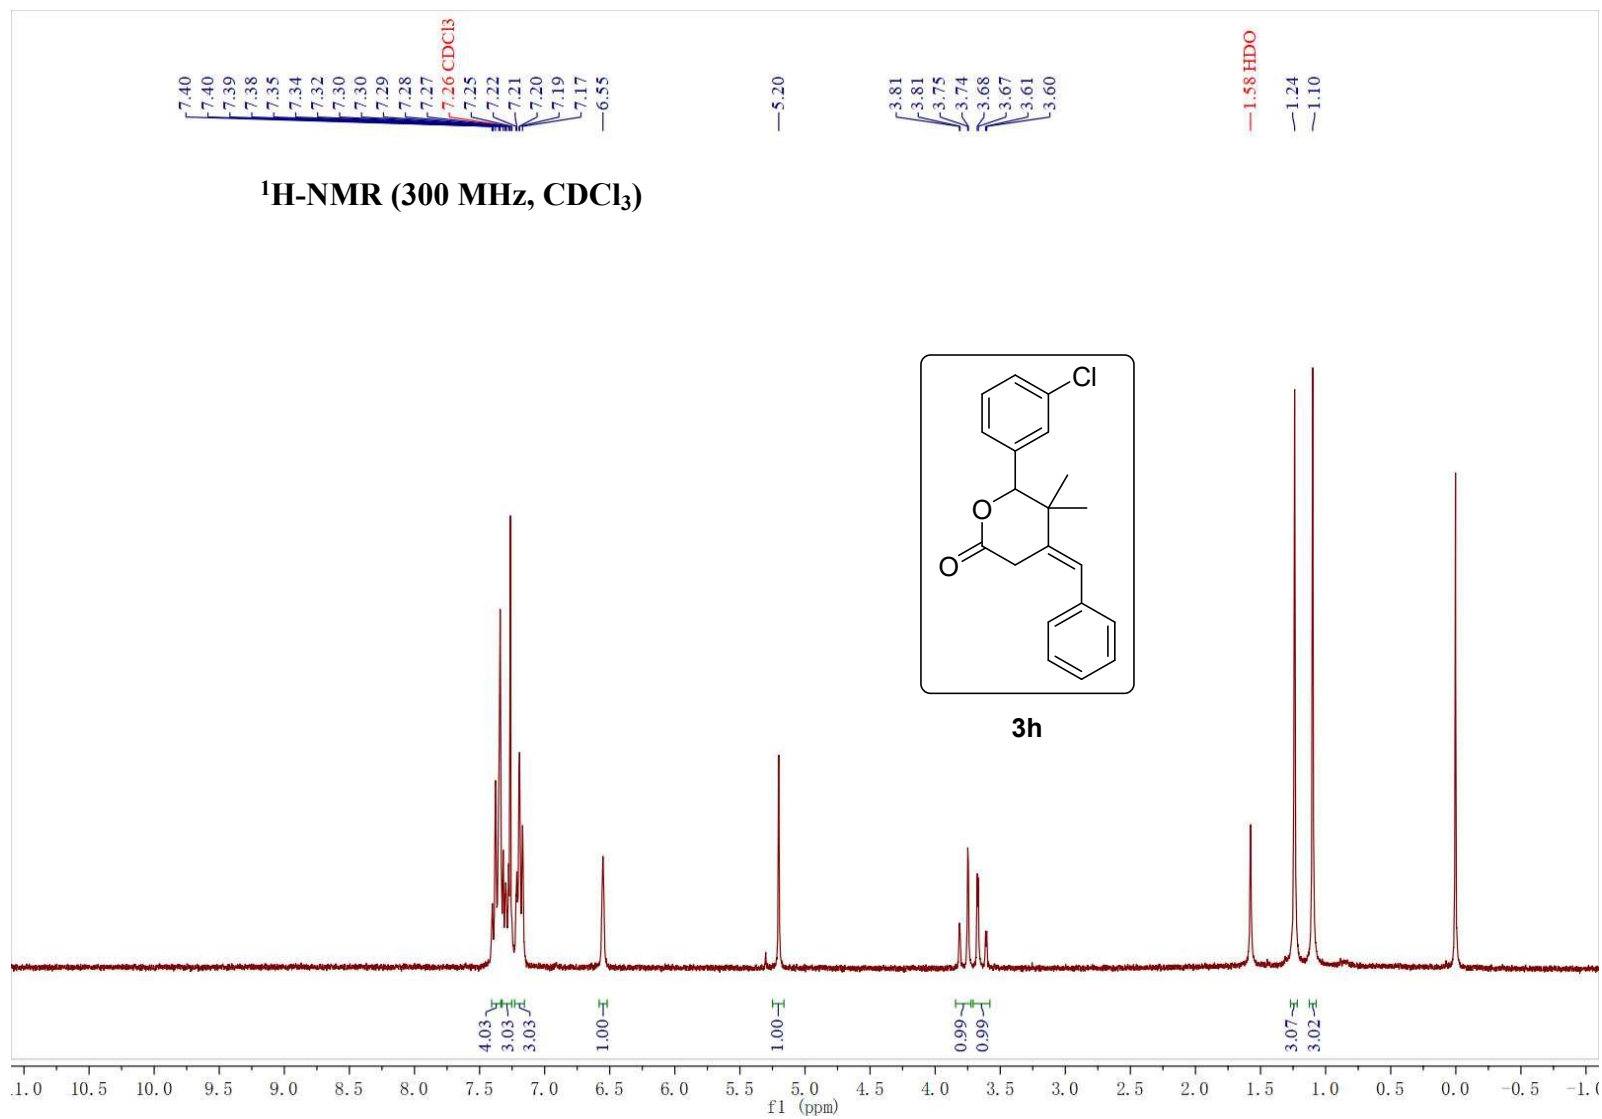

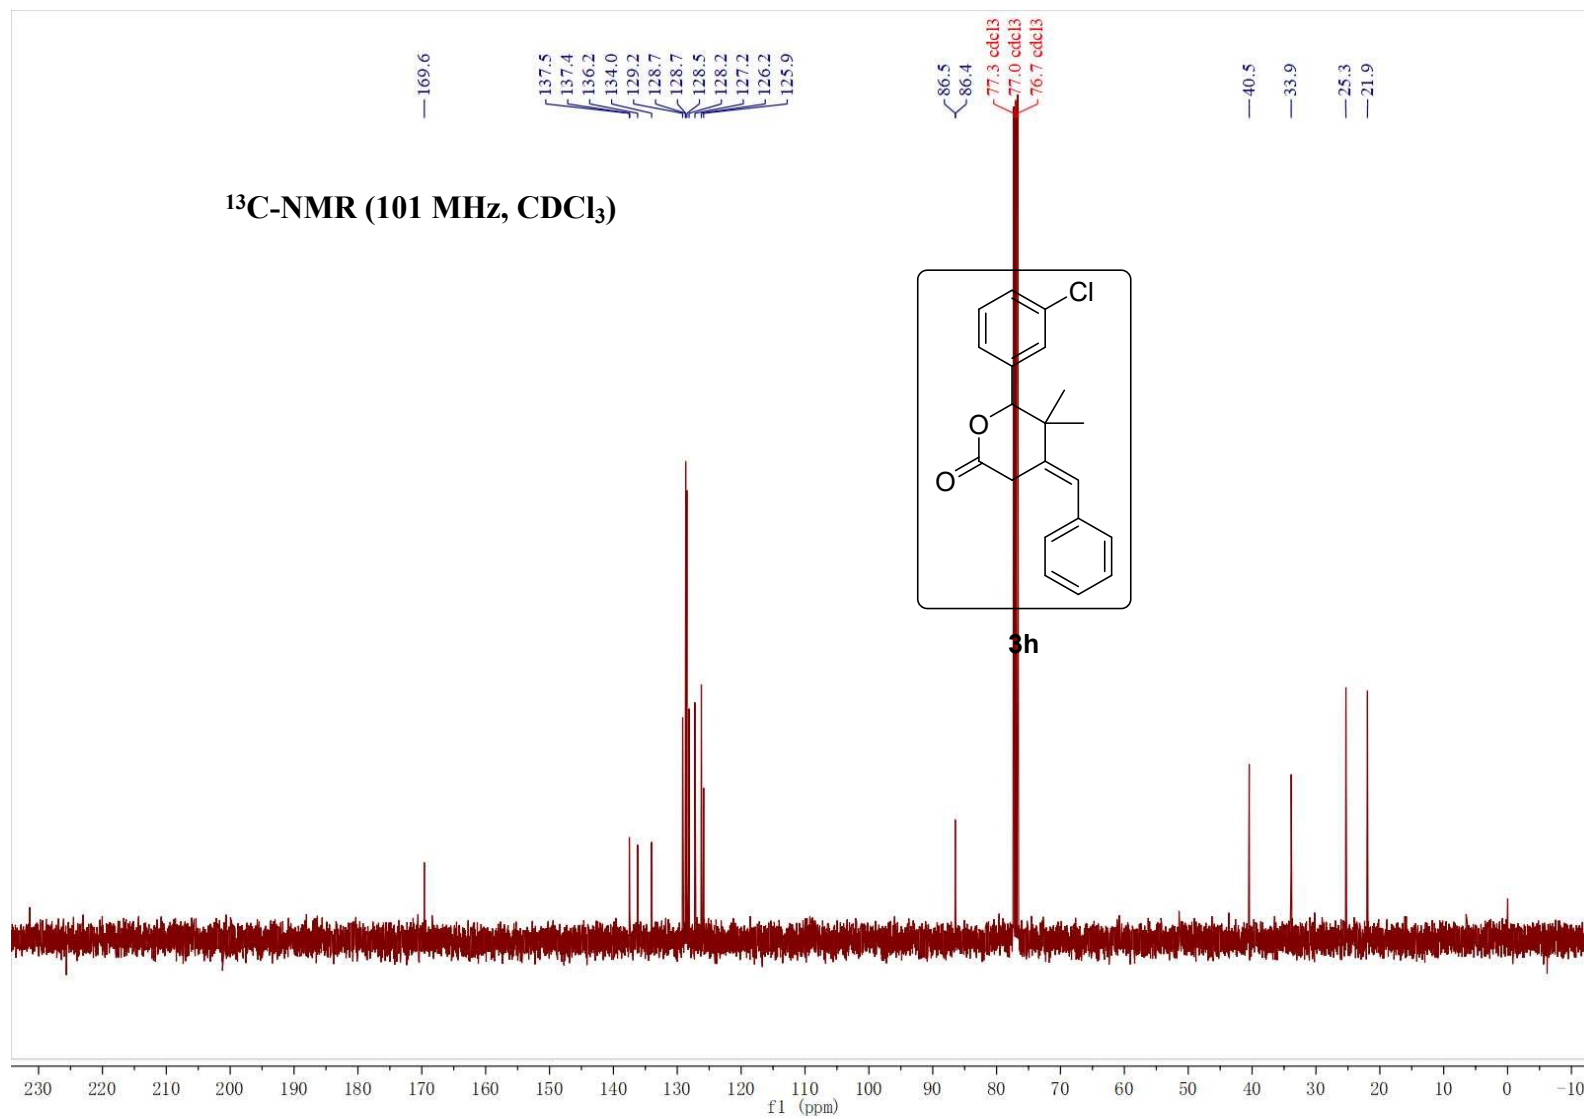

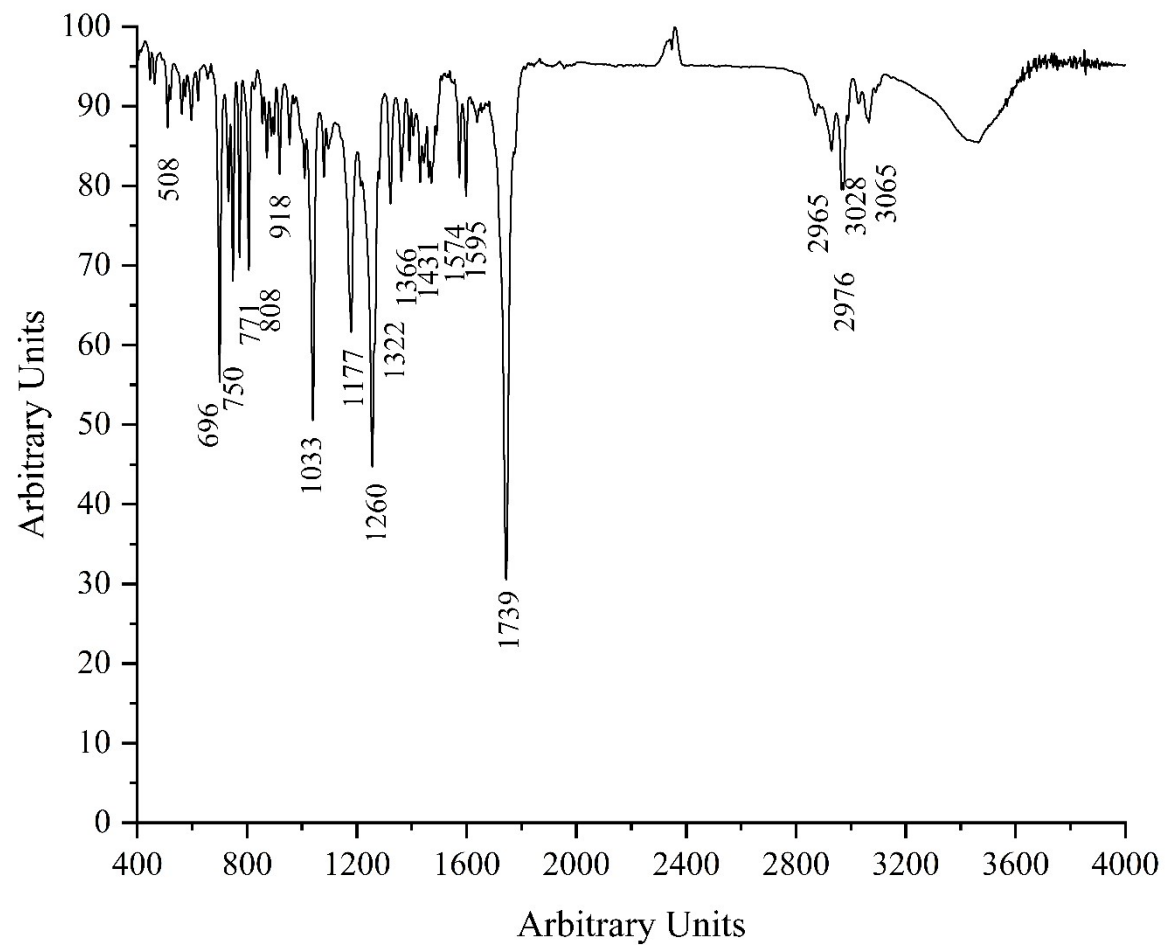

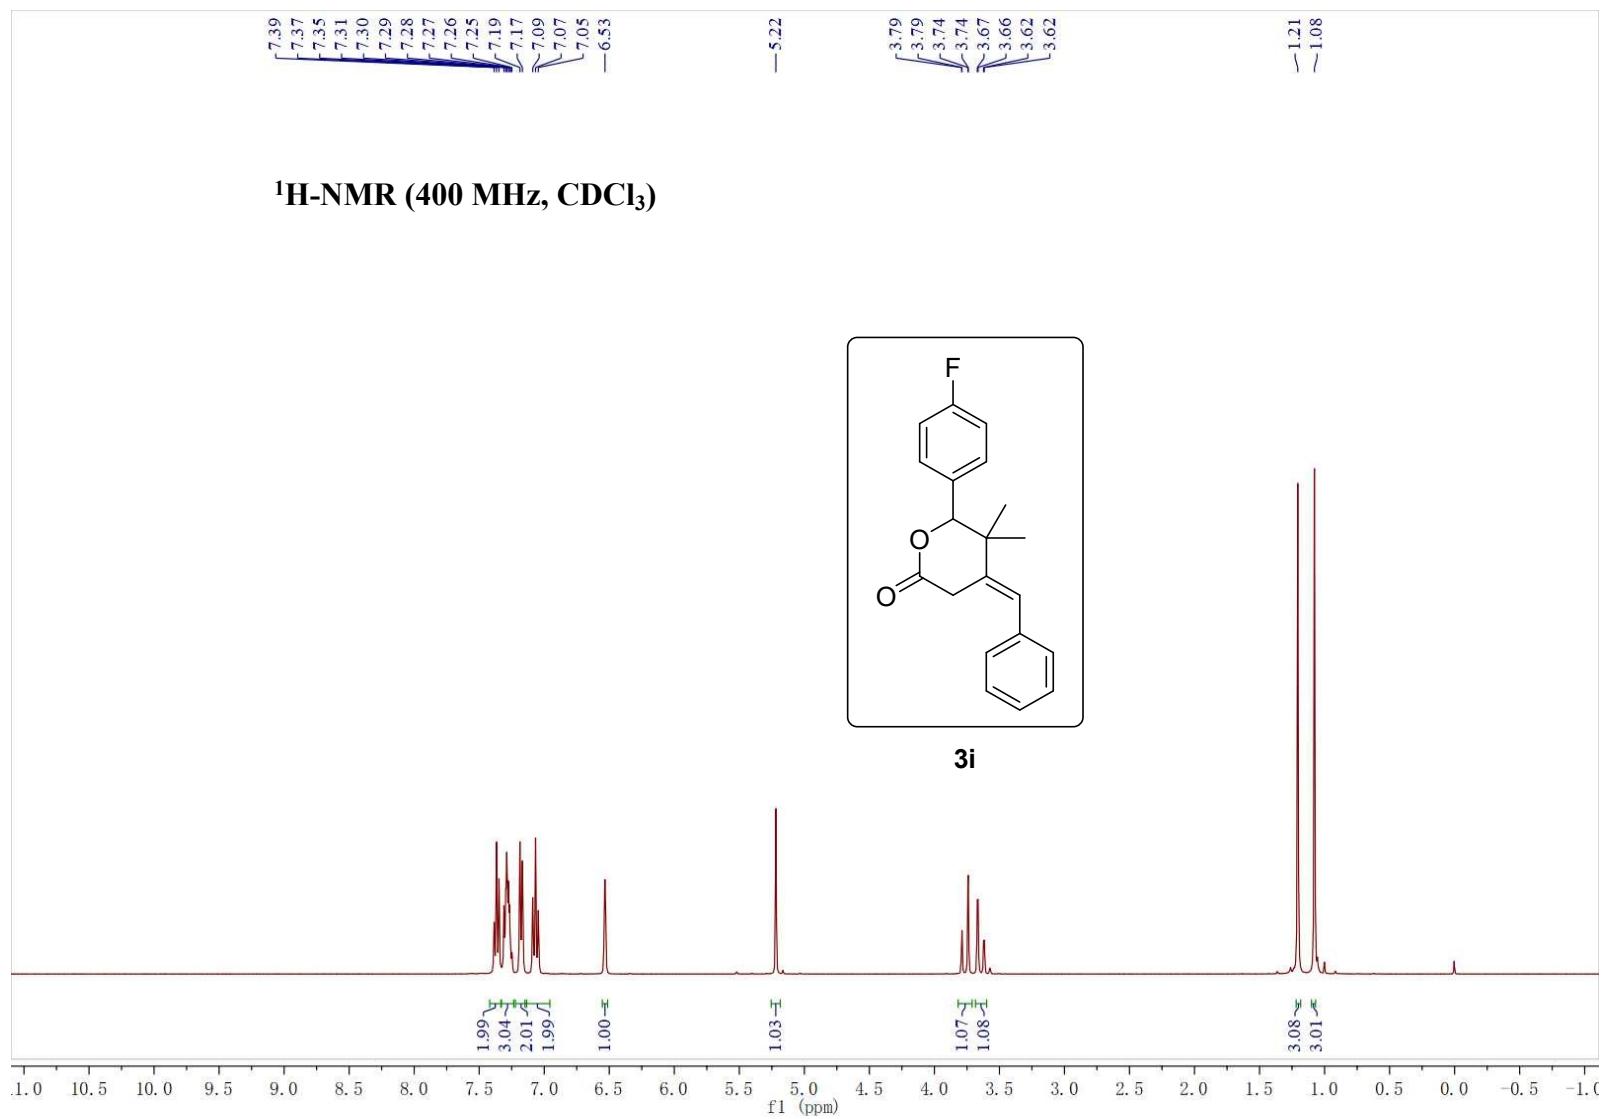

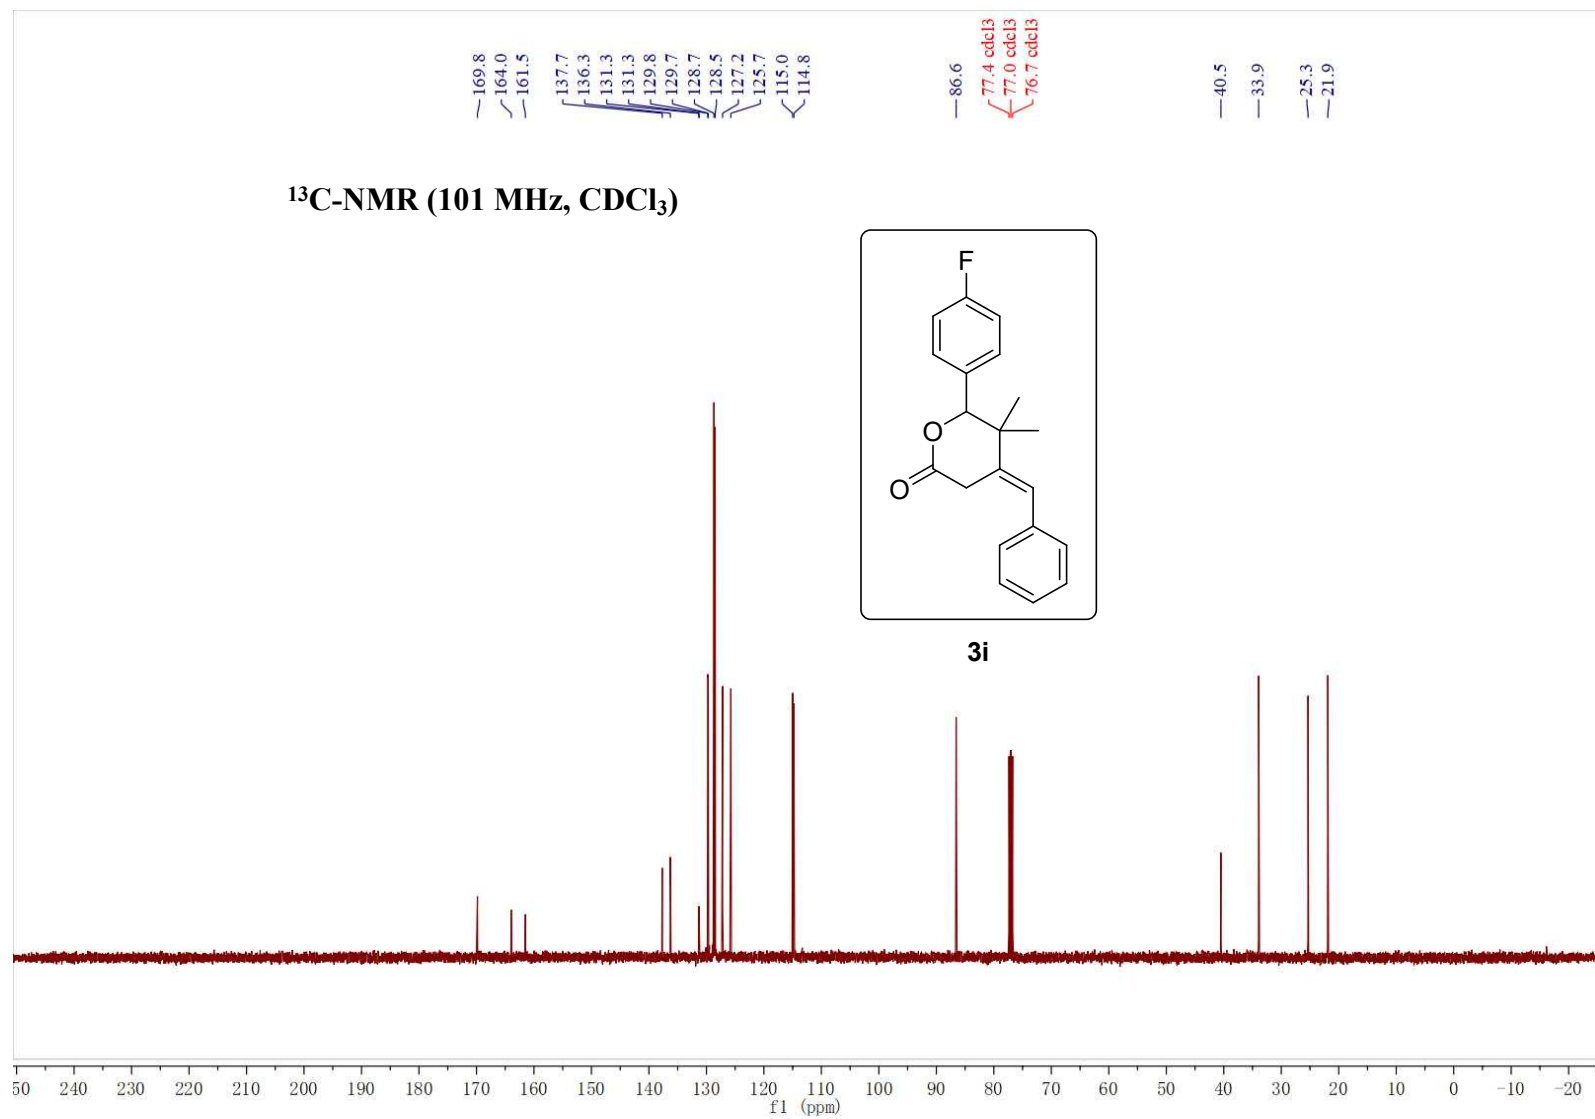

**$^{19}\text{F}$ -NMR (376 MHz,  $\text{CDCl}_3$ )**

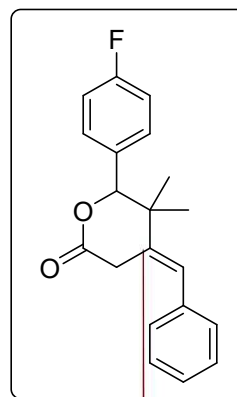

**3i**

—113.30

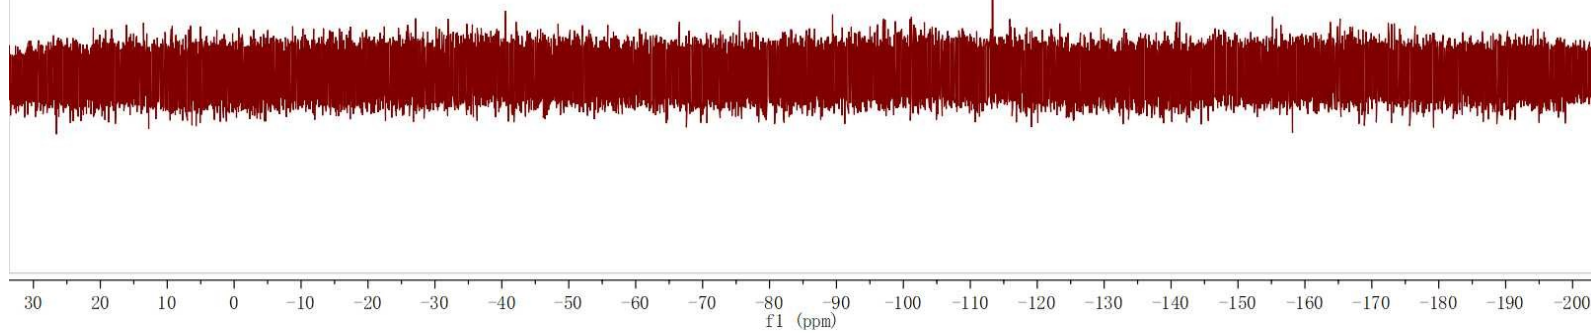



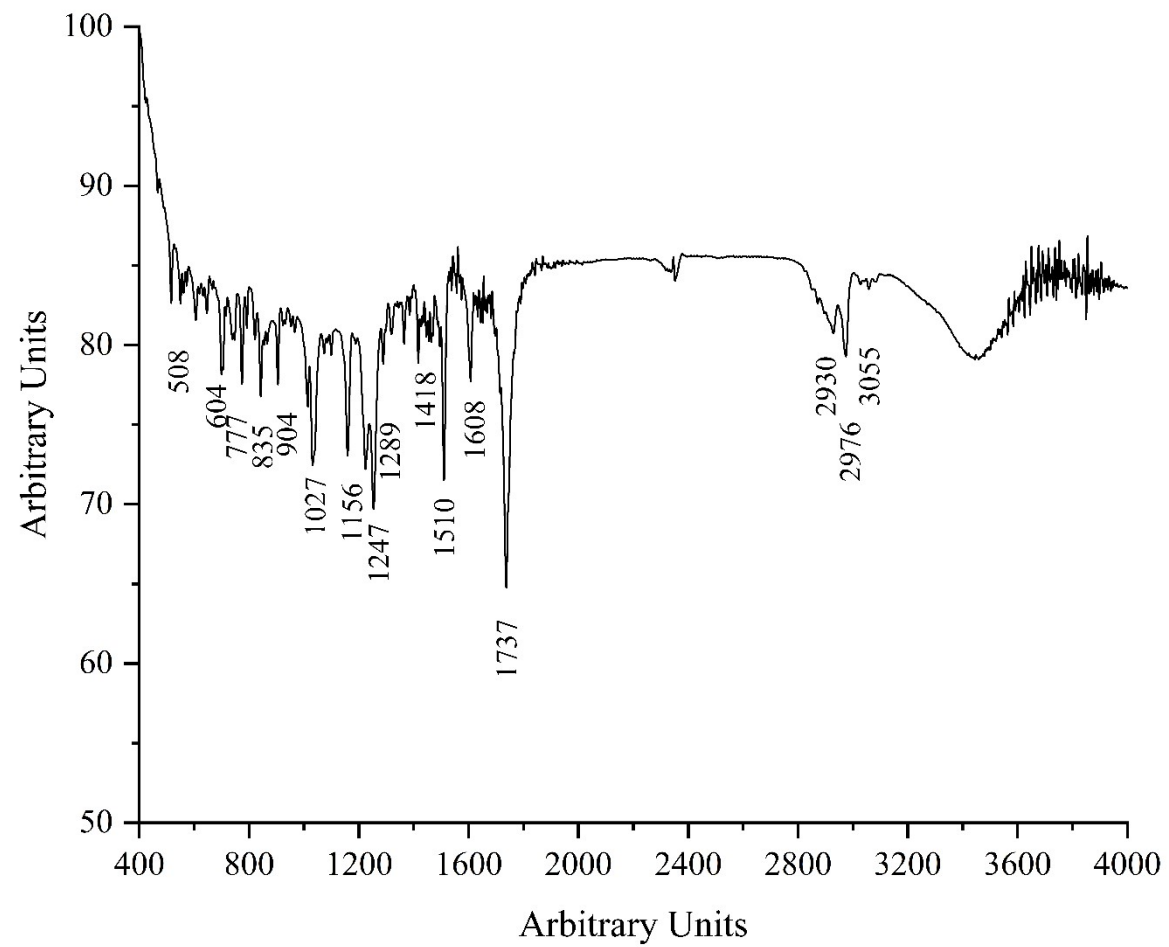

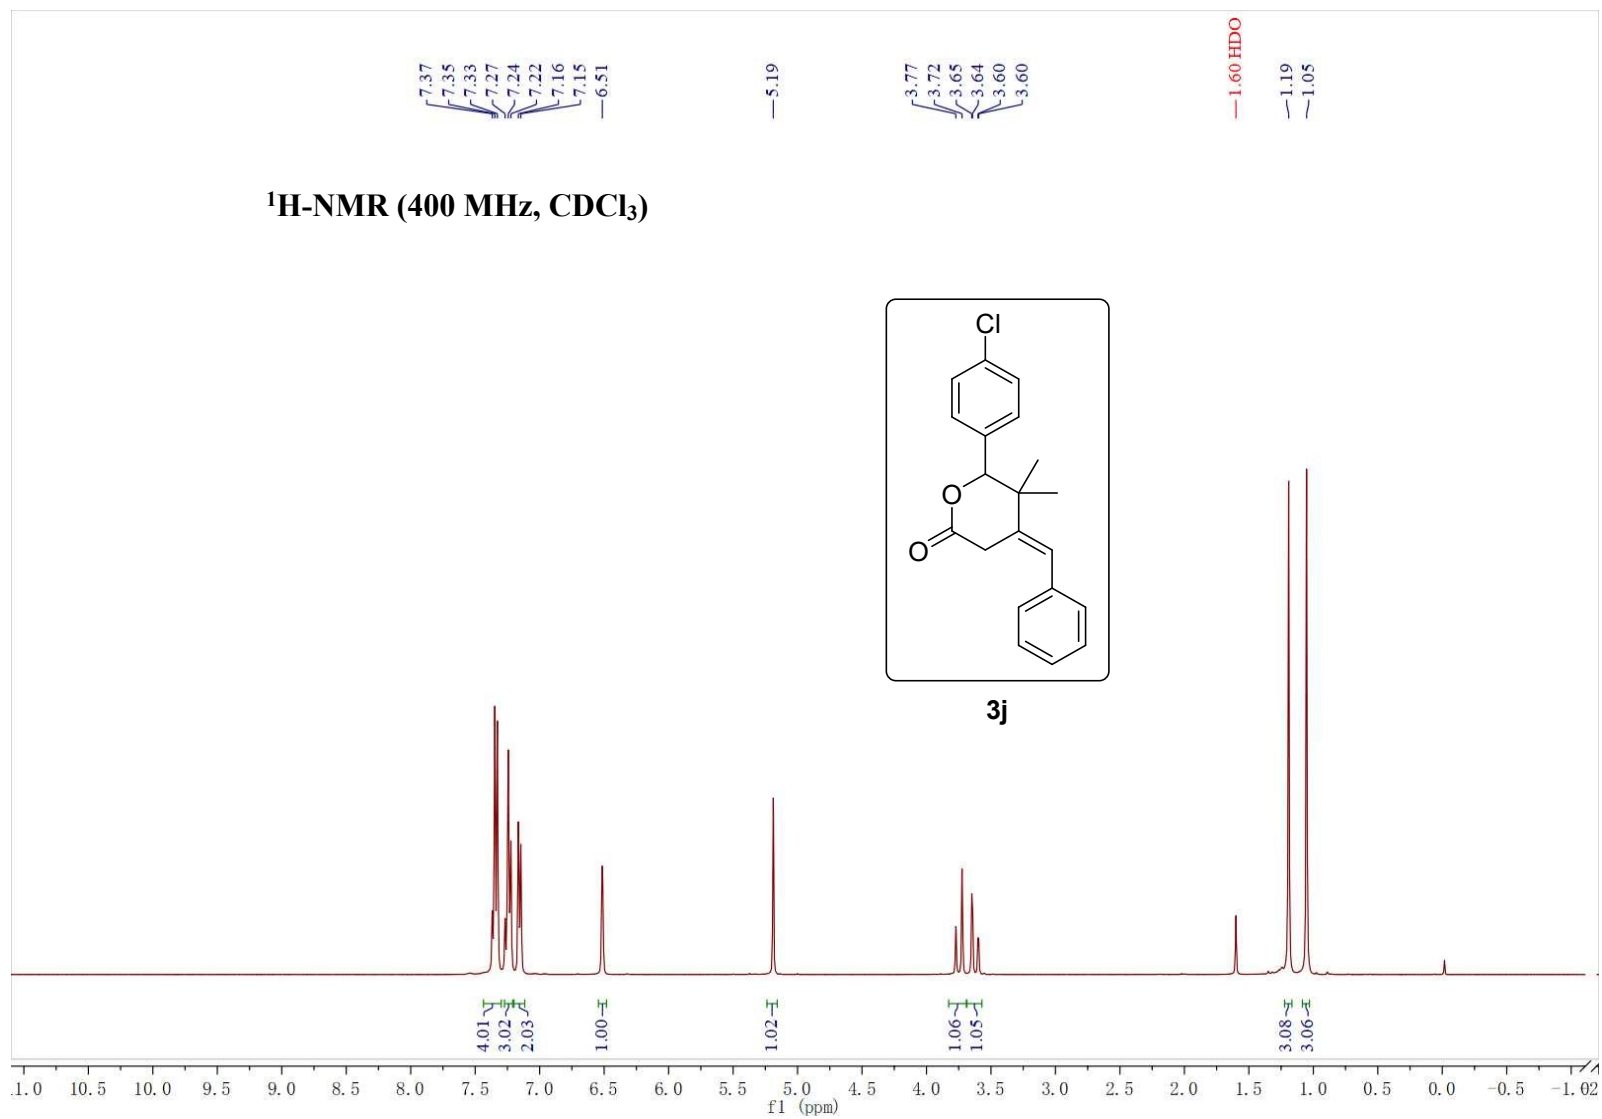

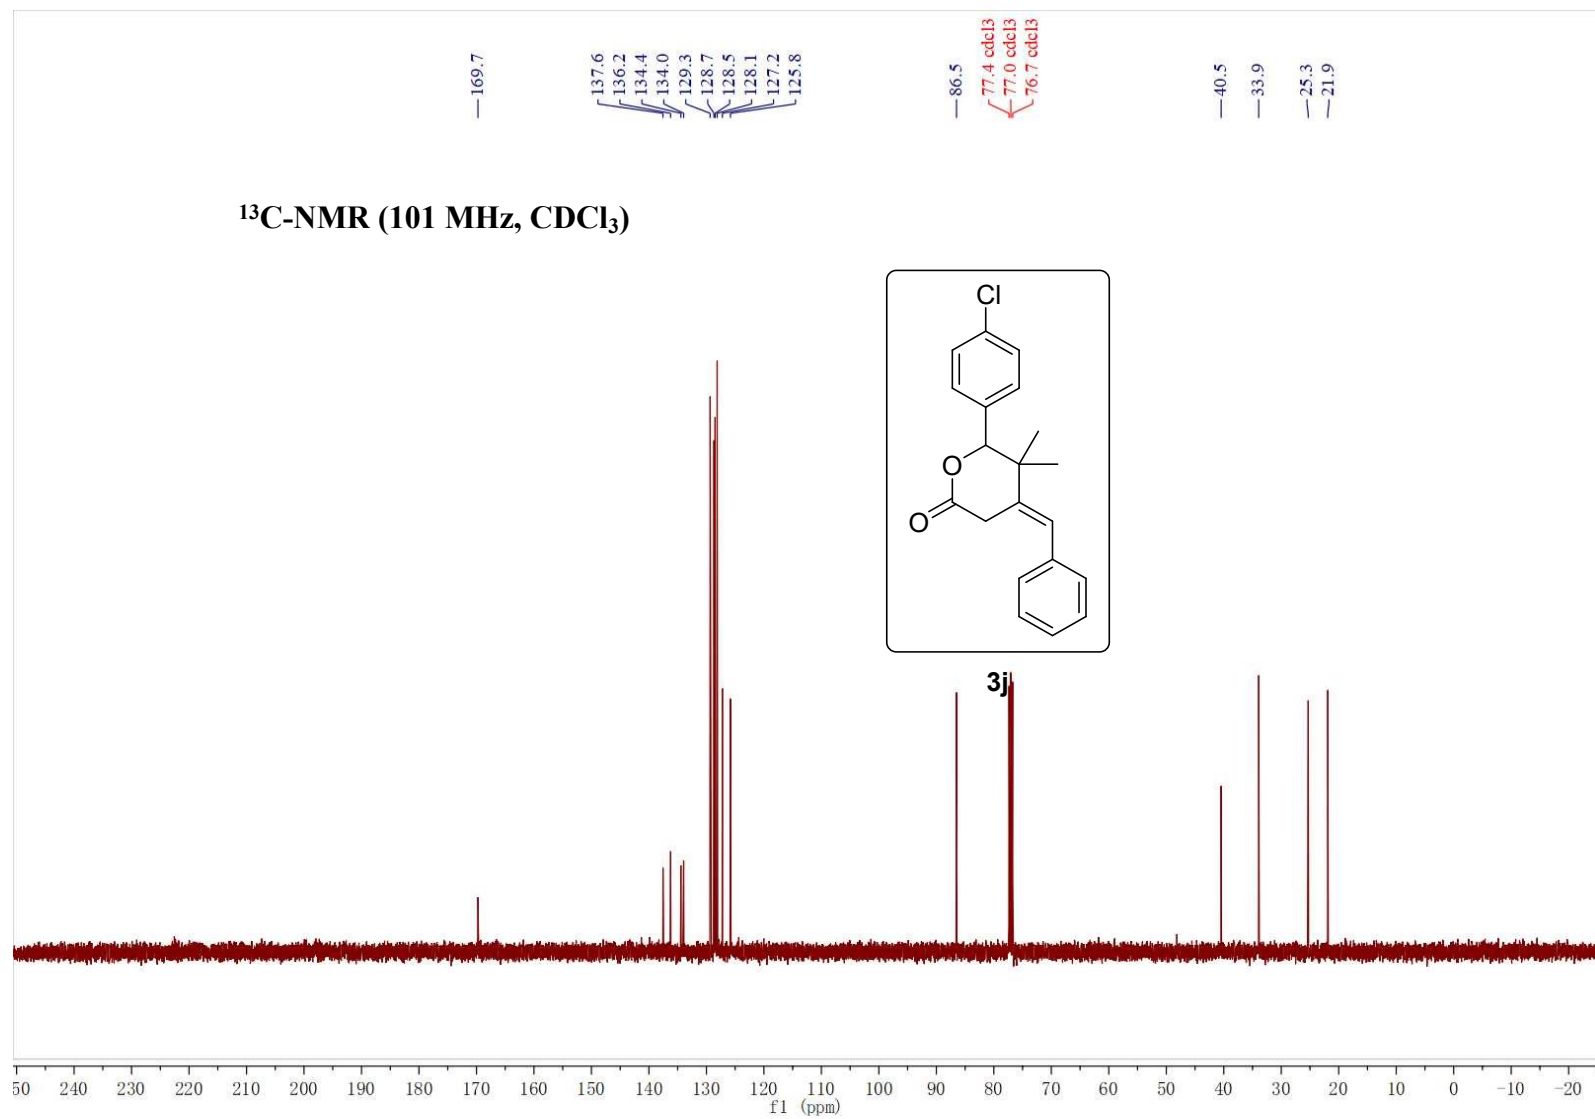

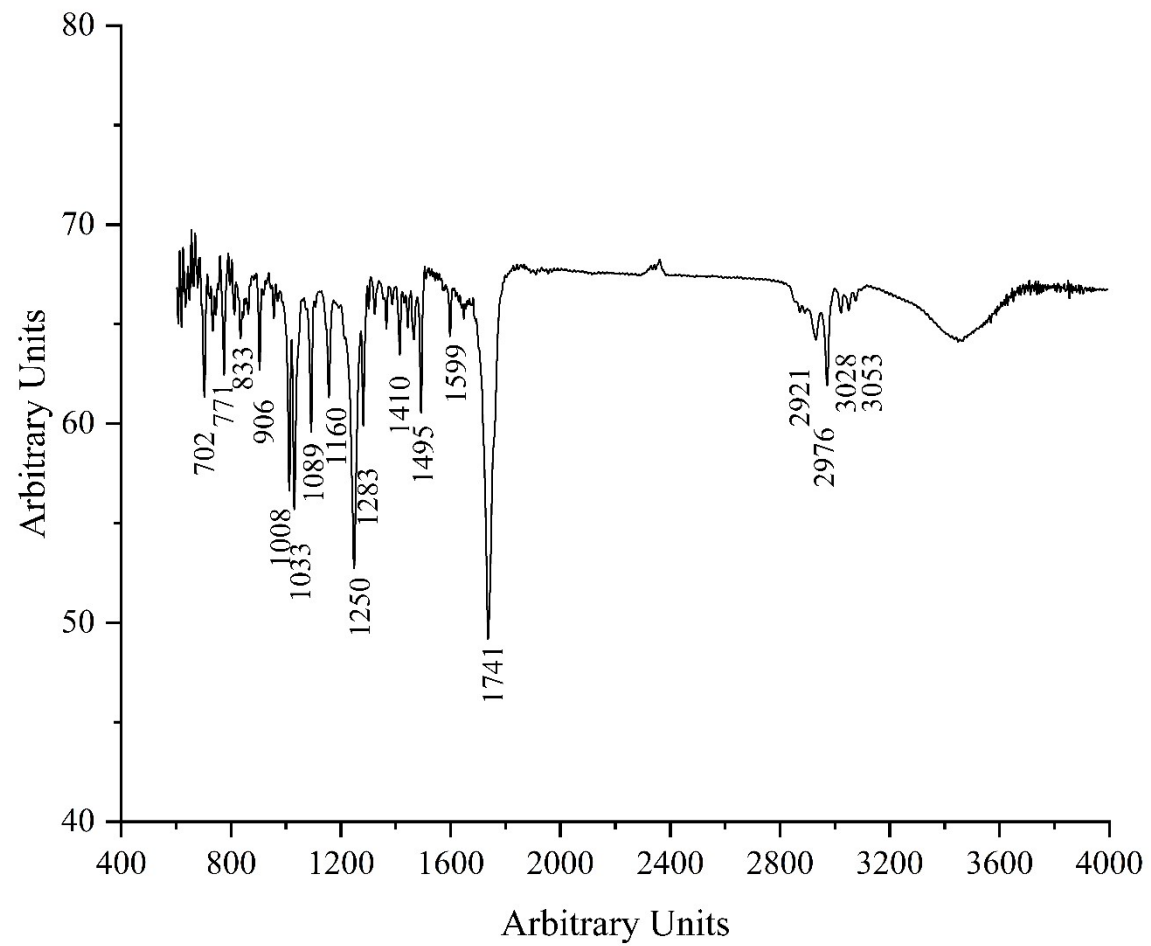

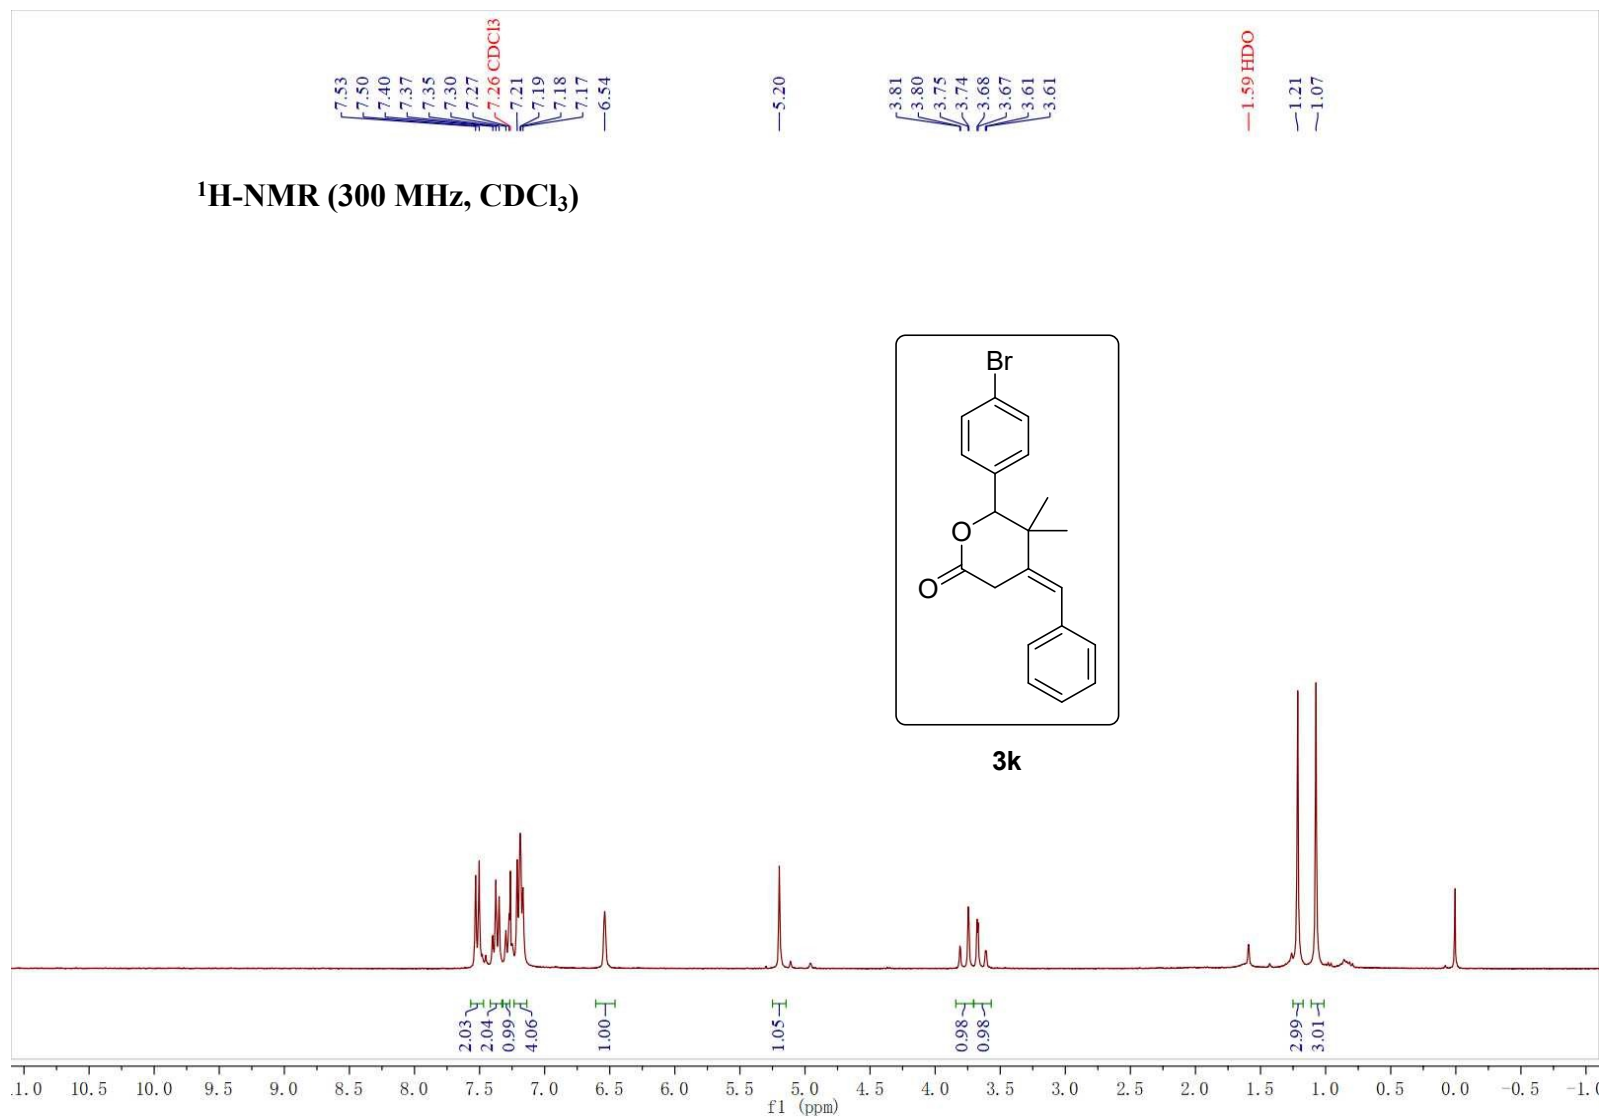

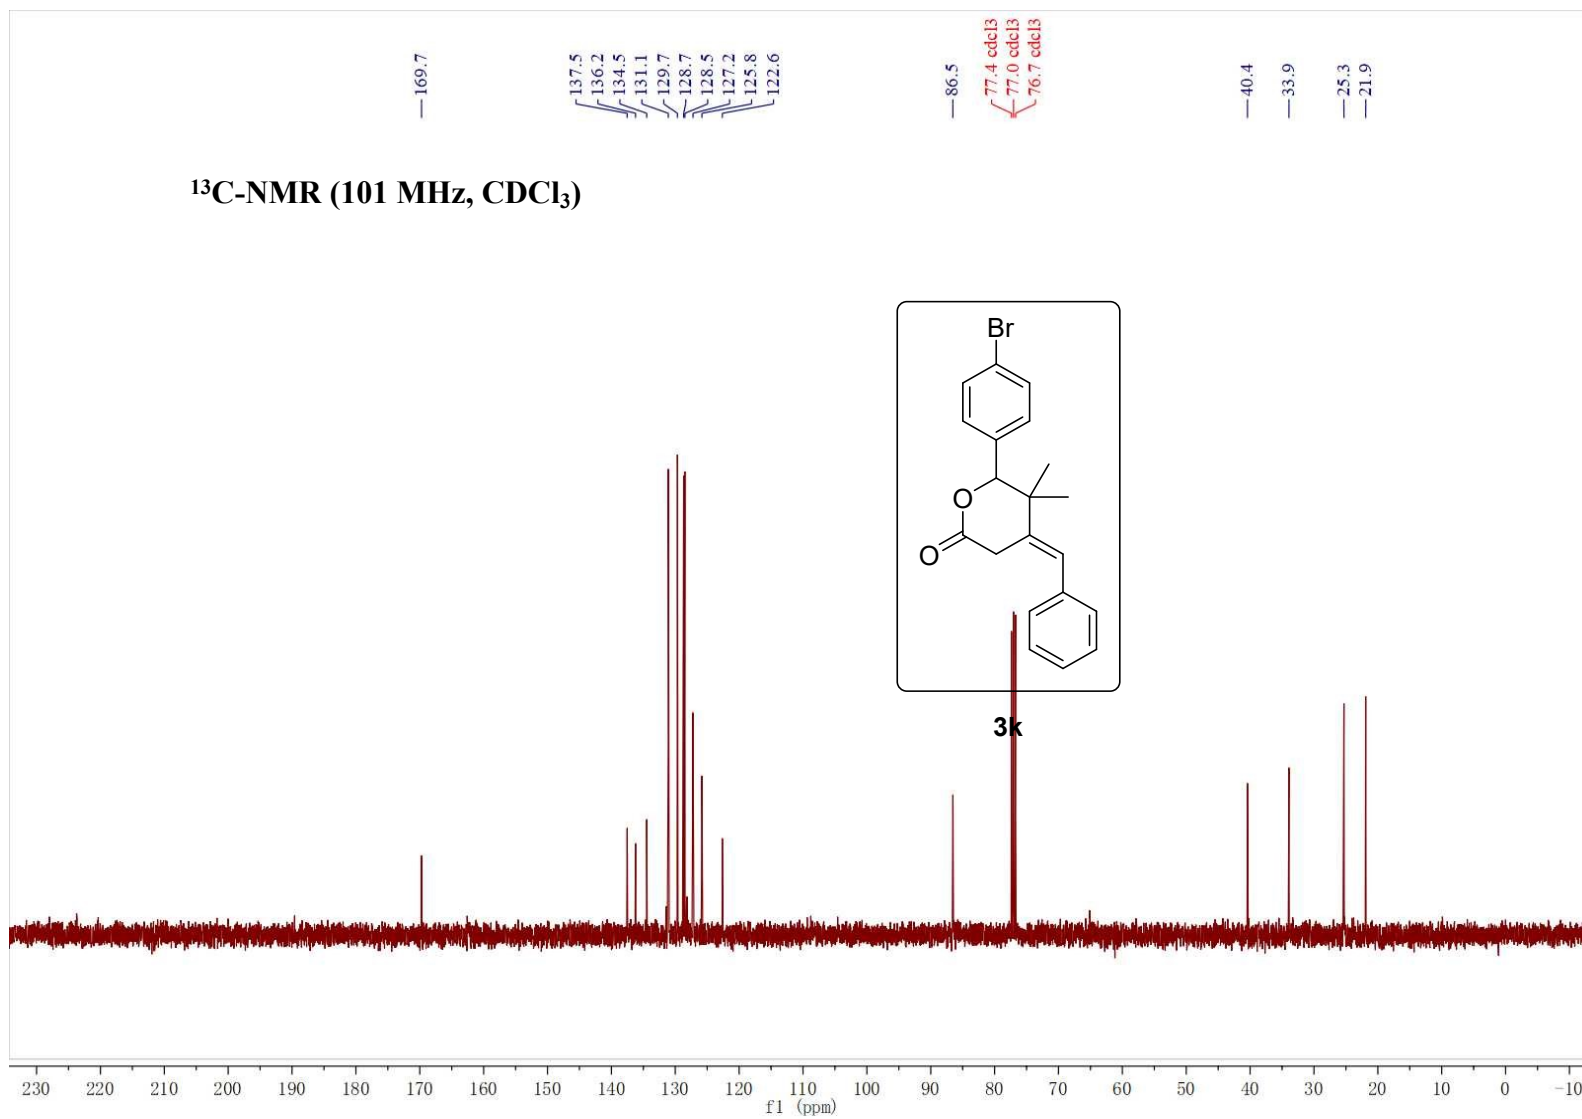

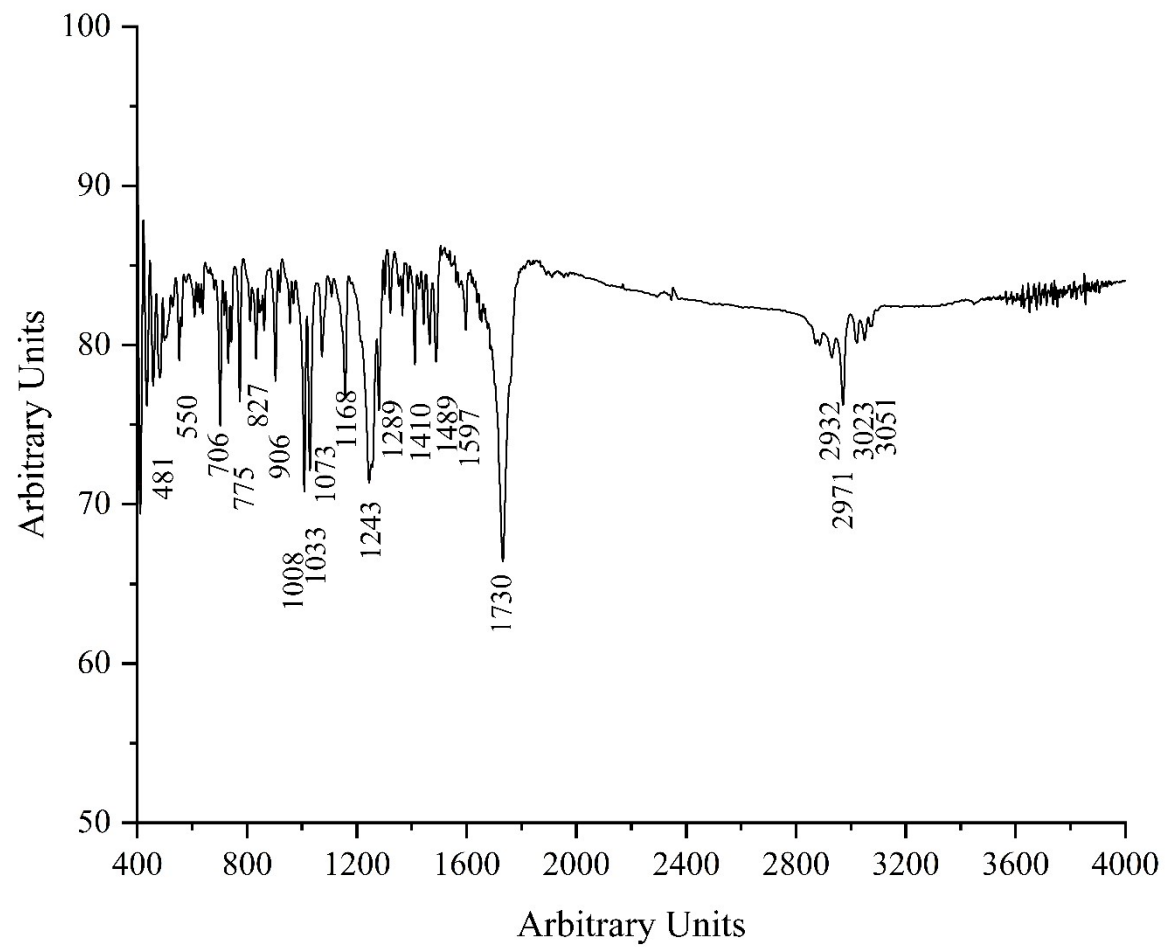

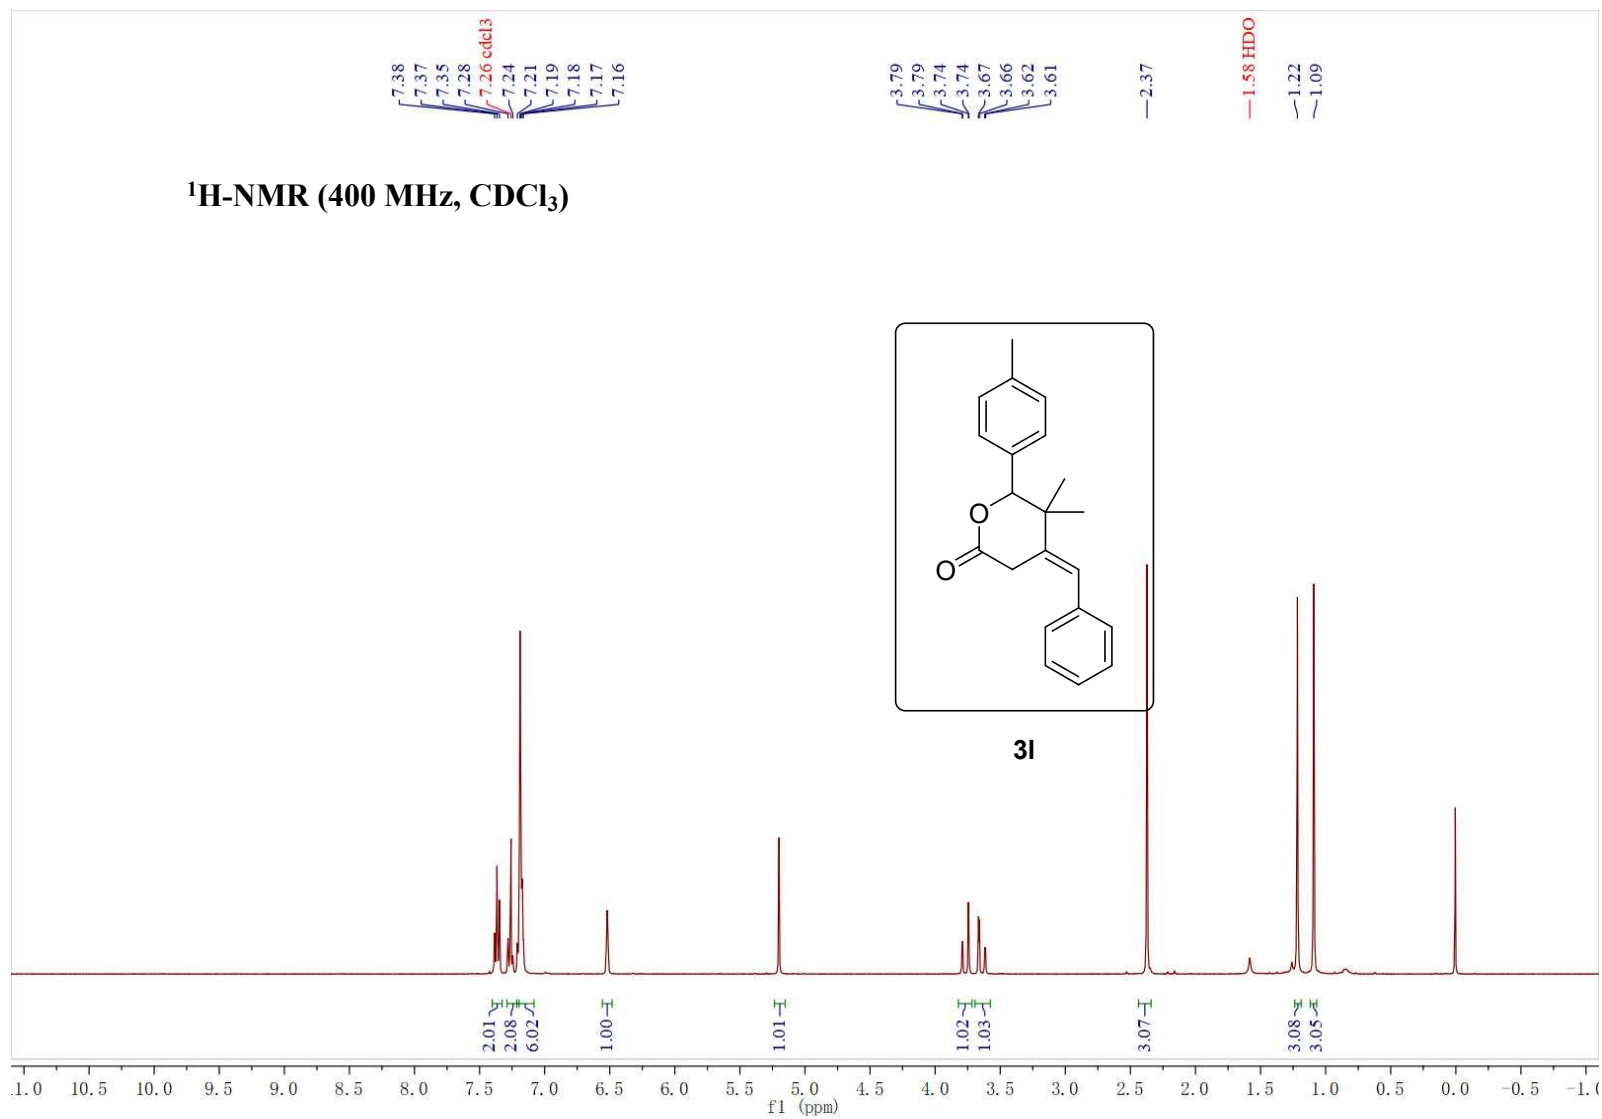



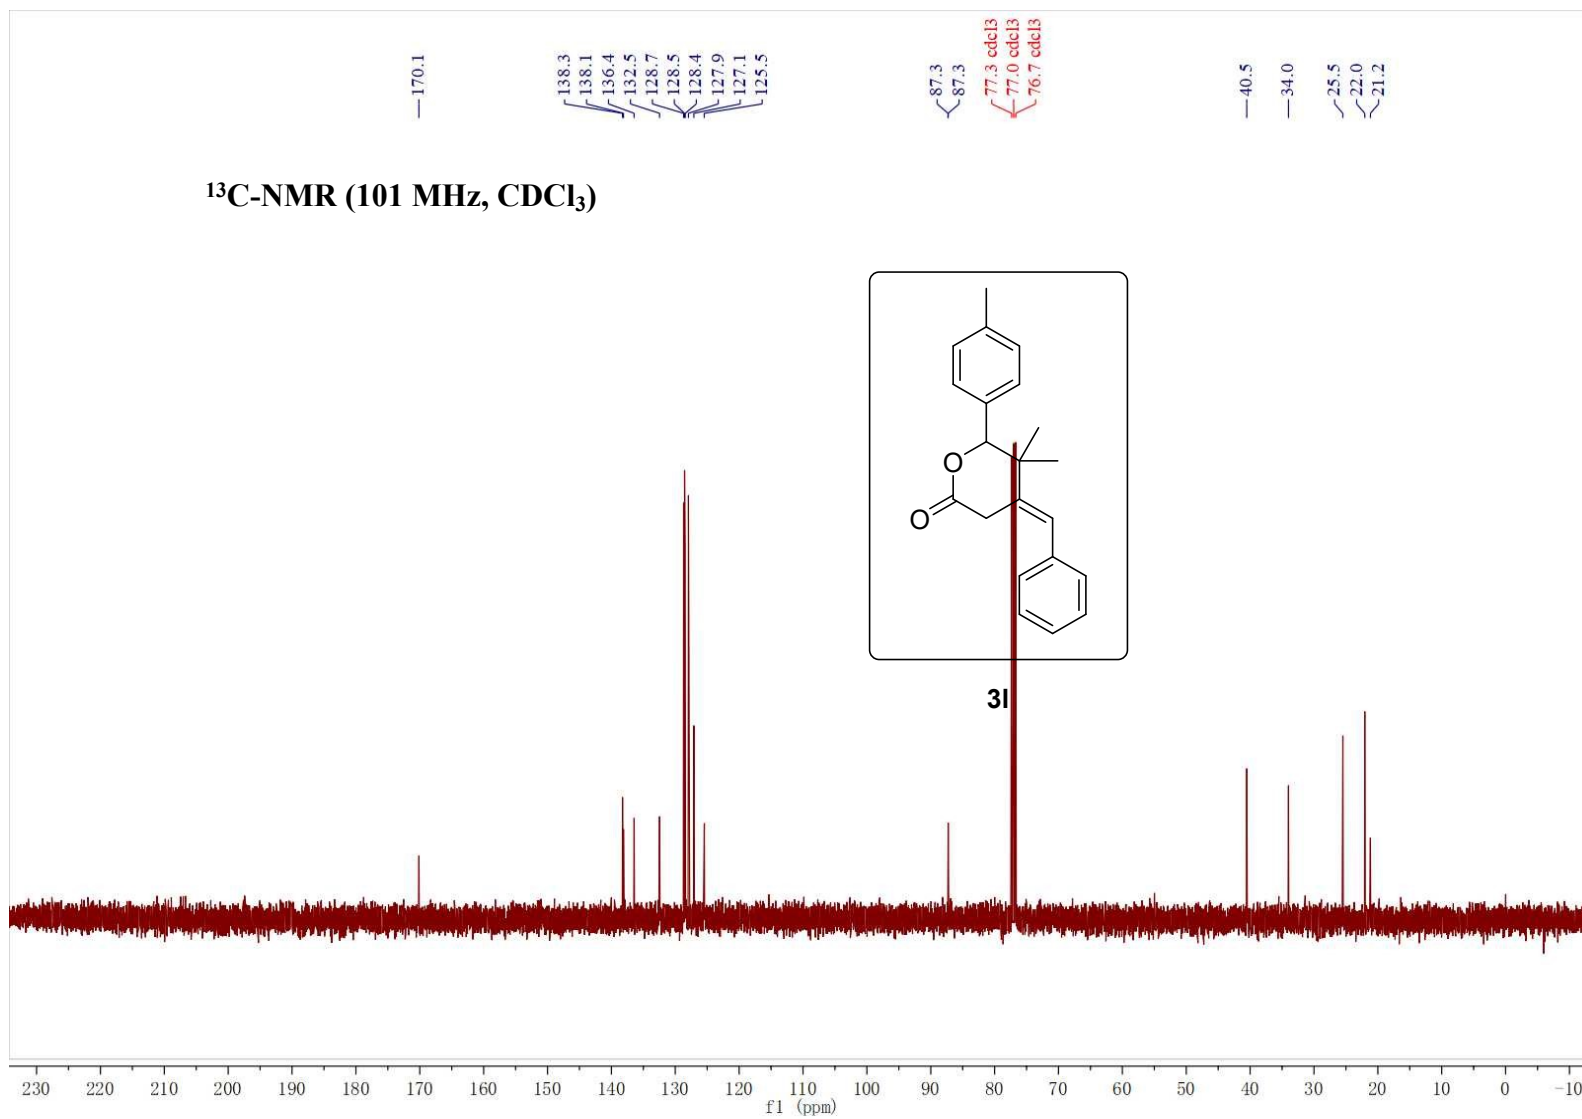

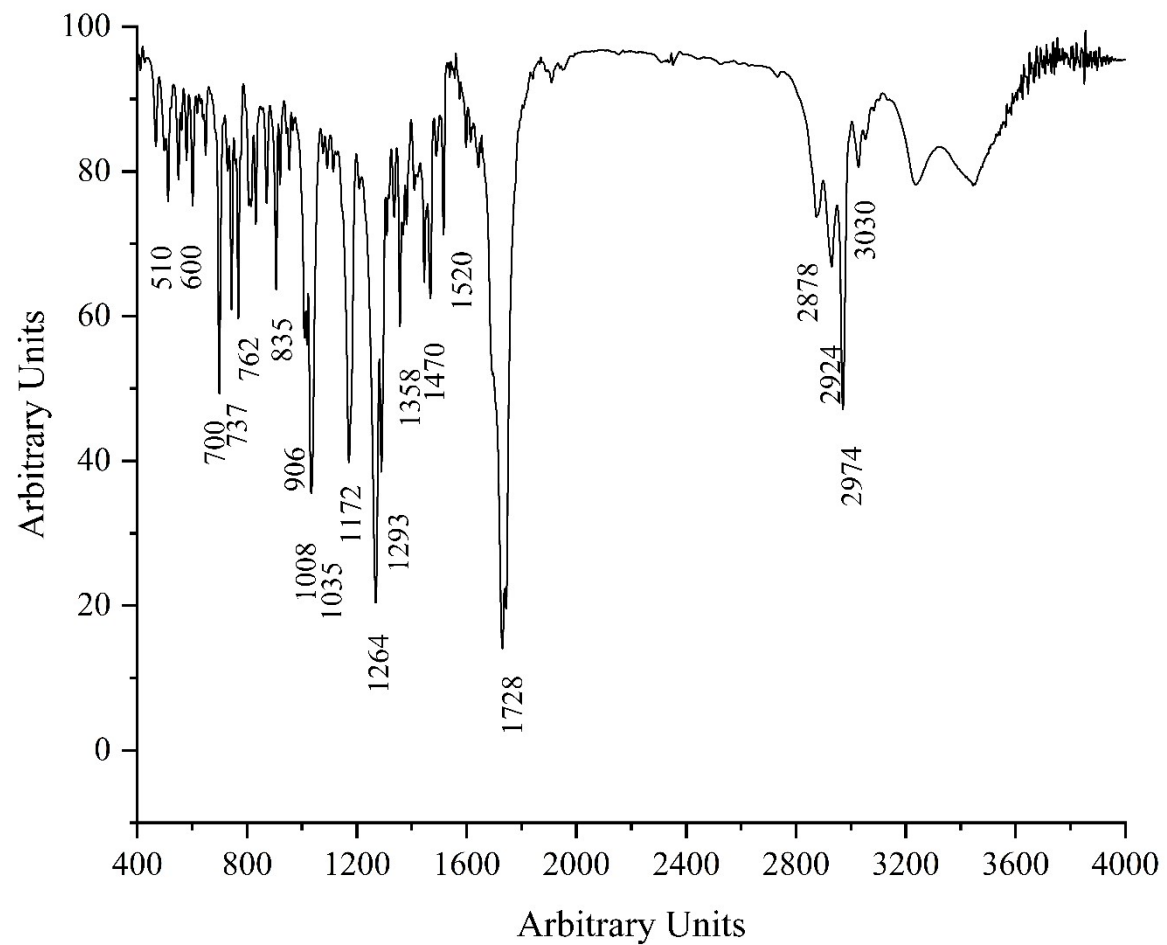

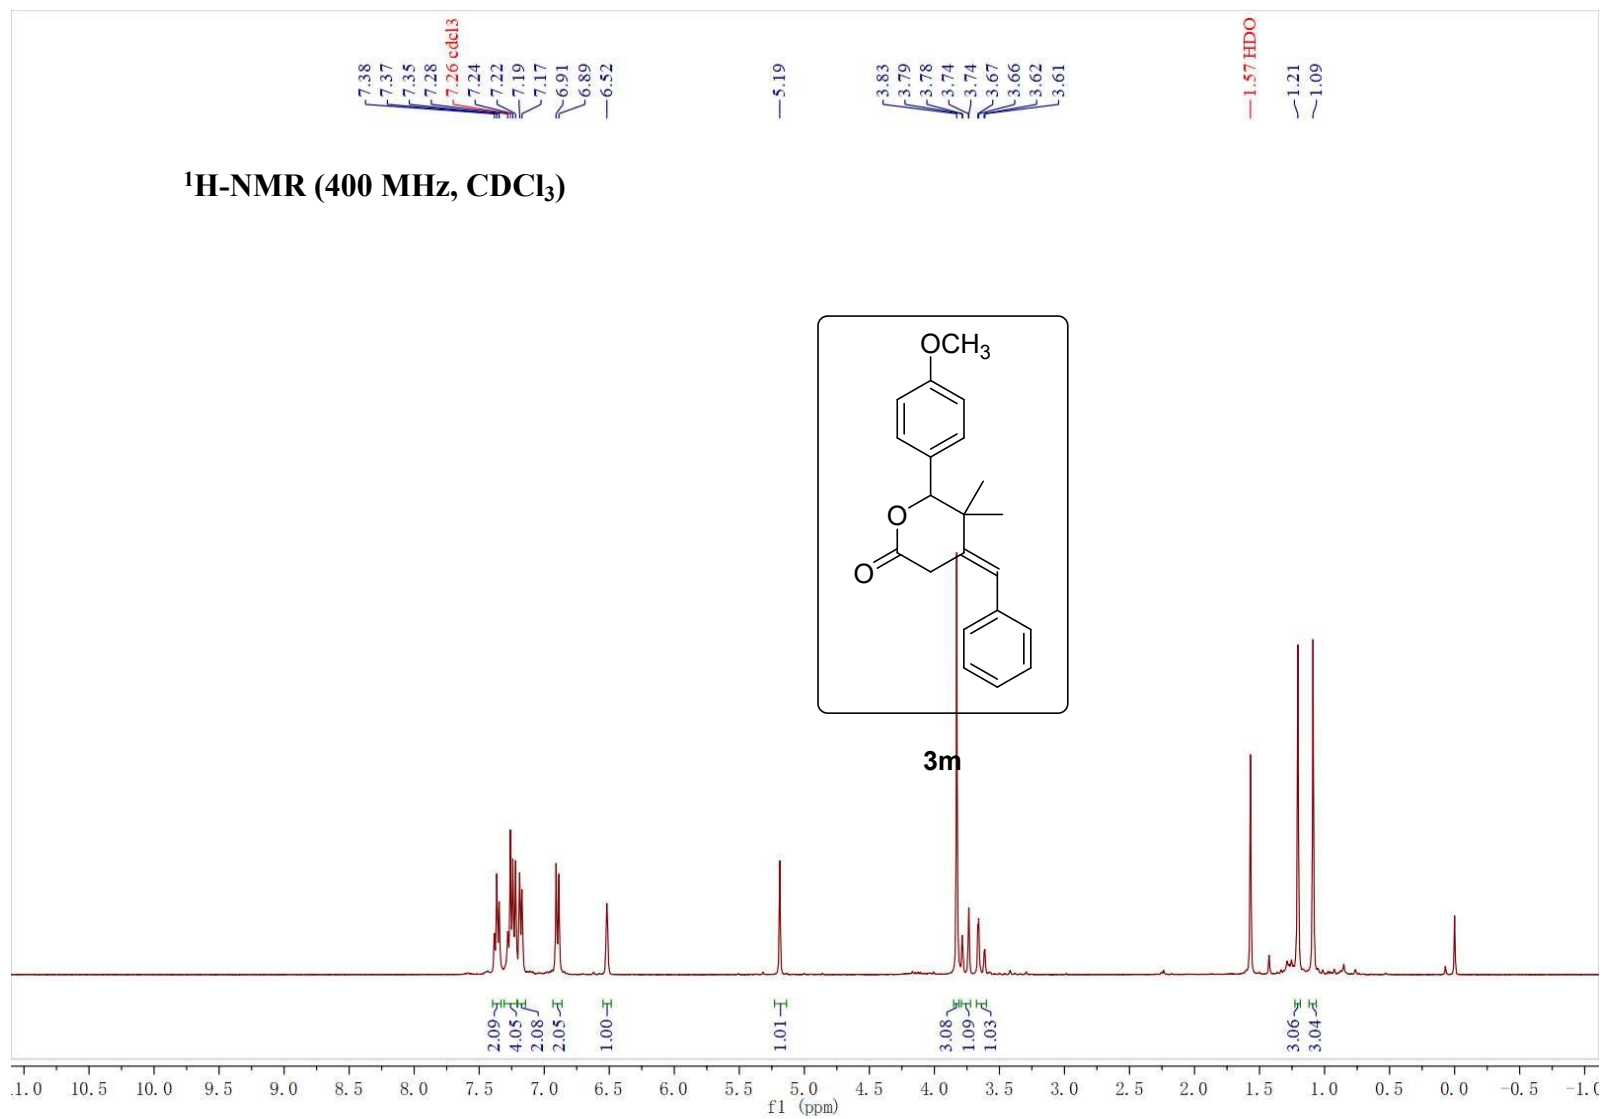

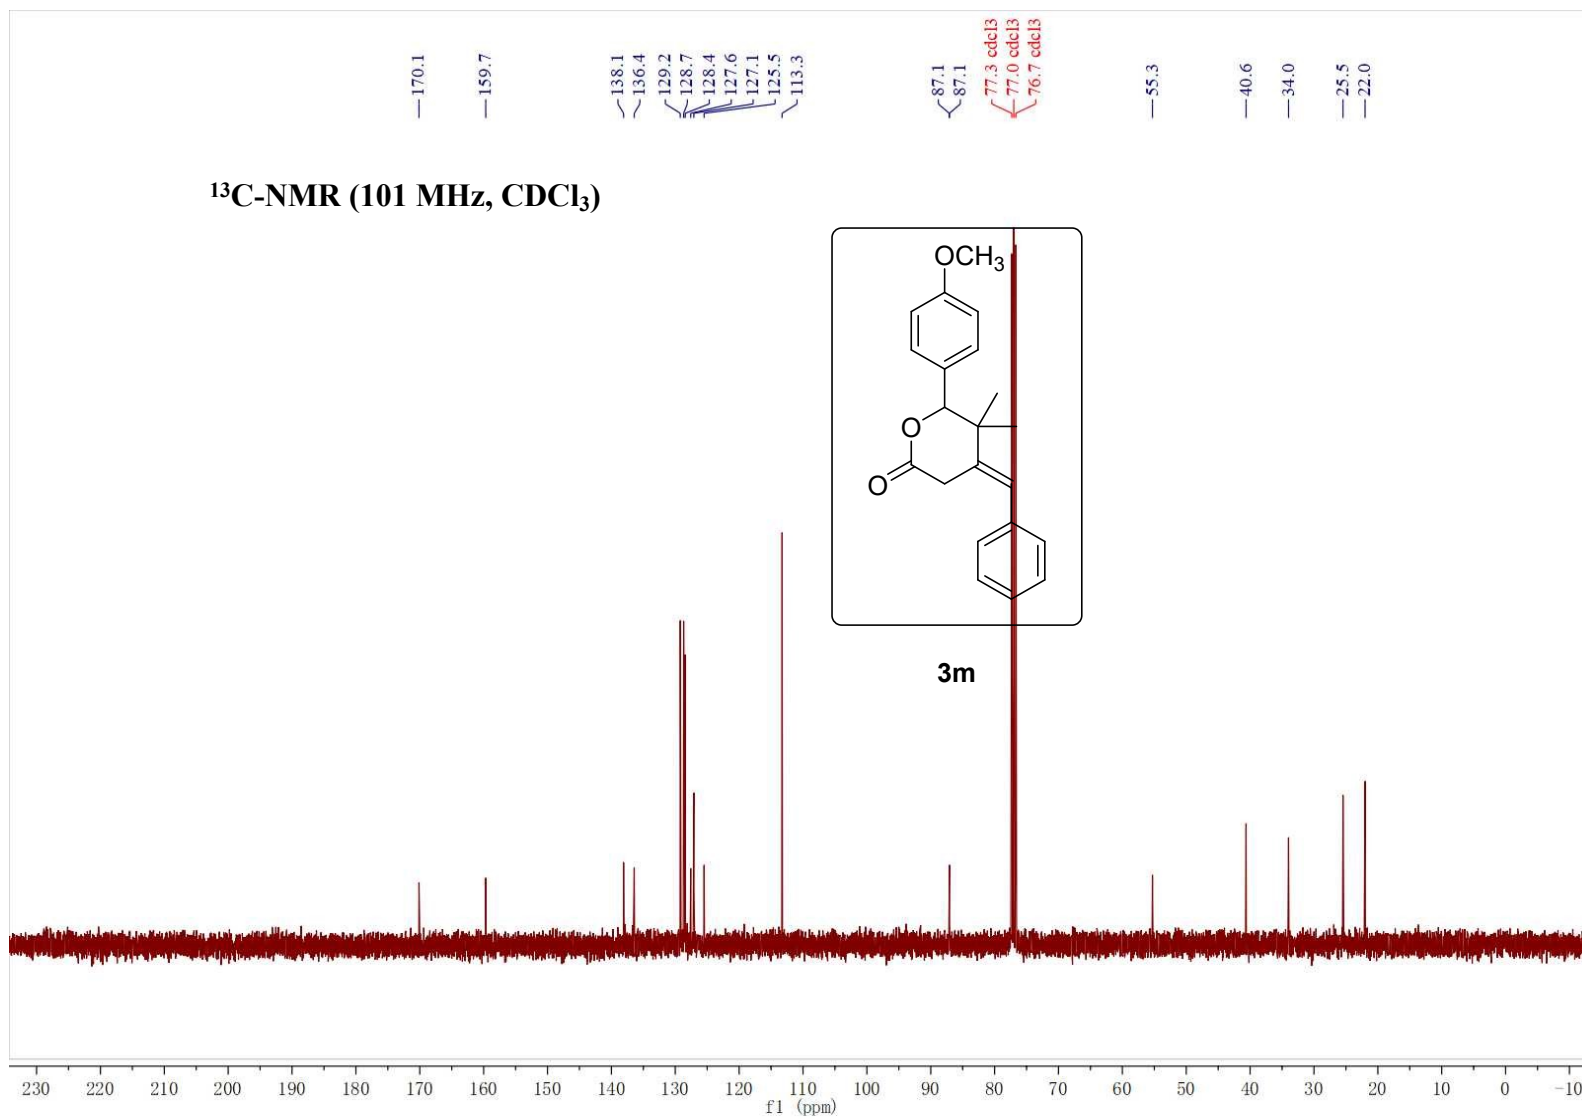

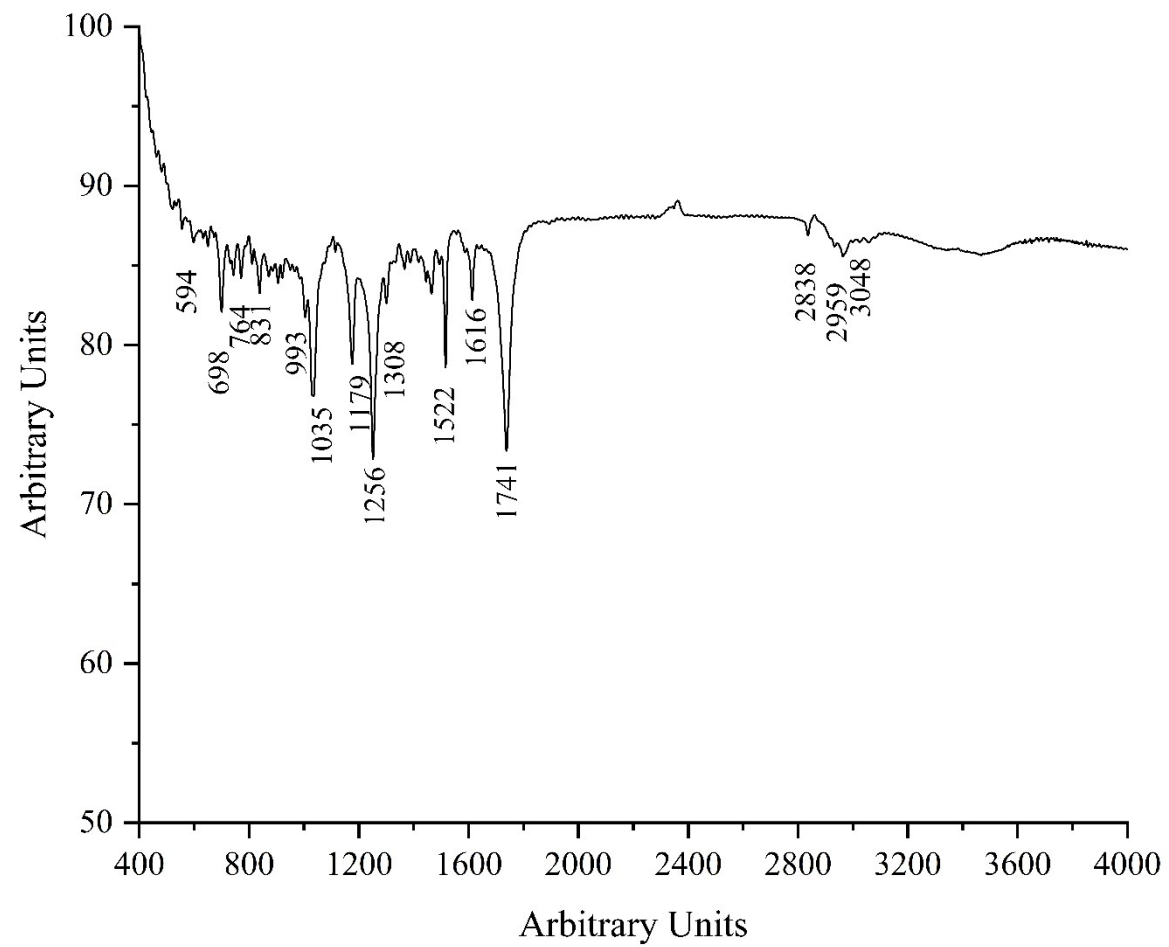

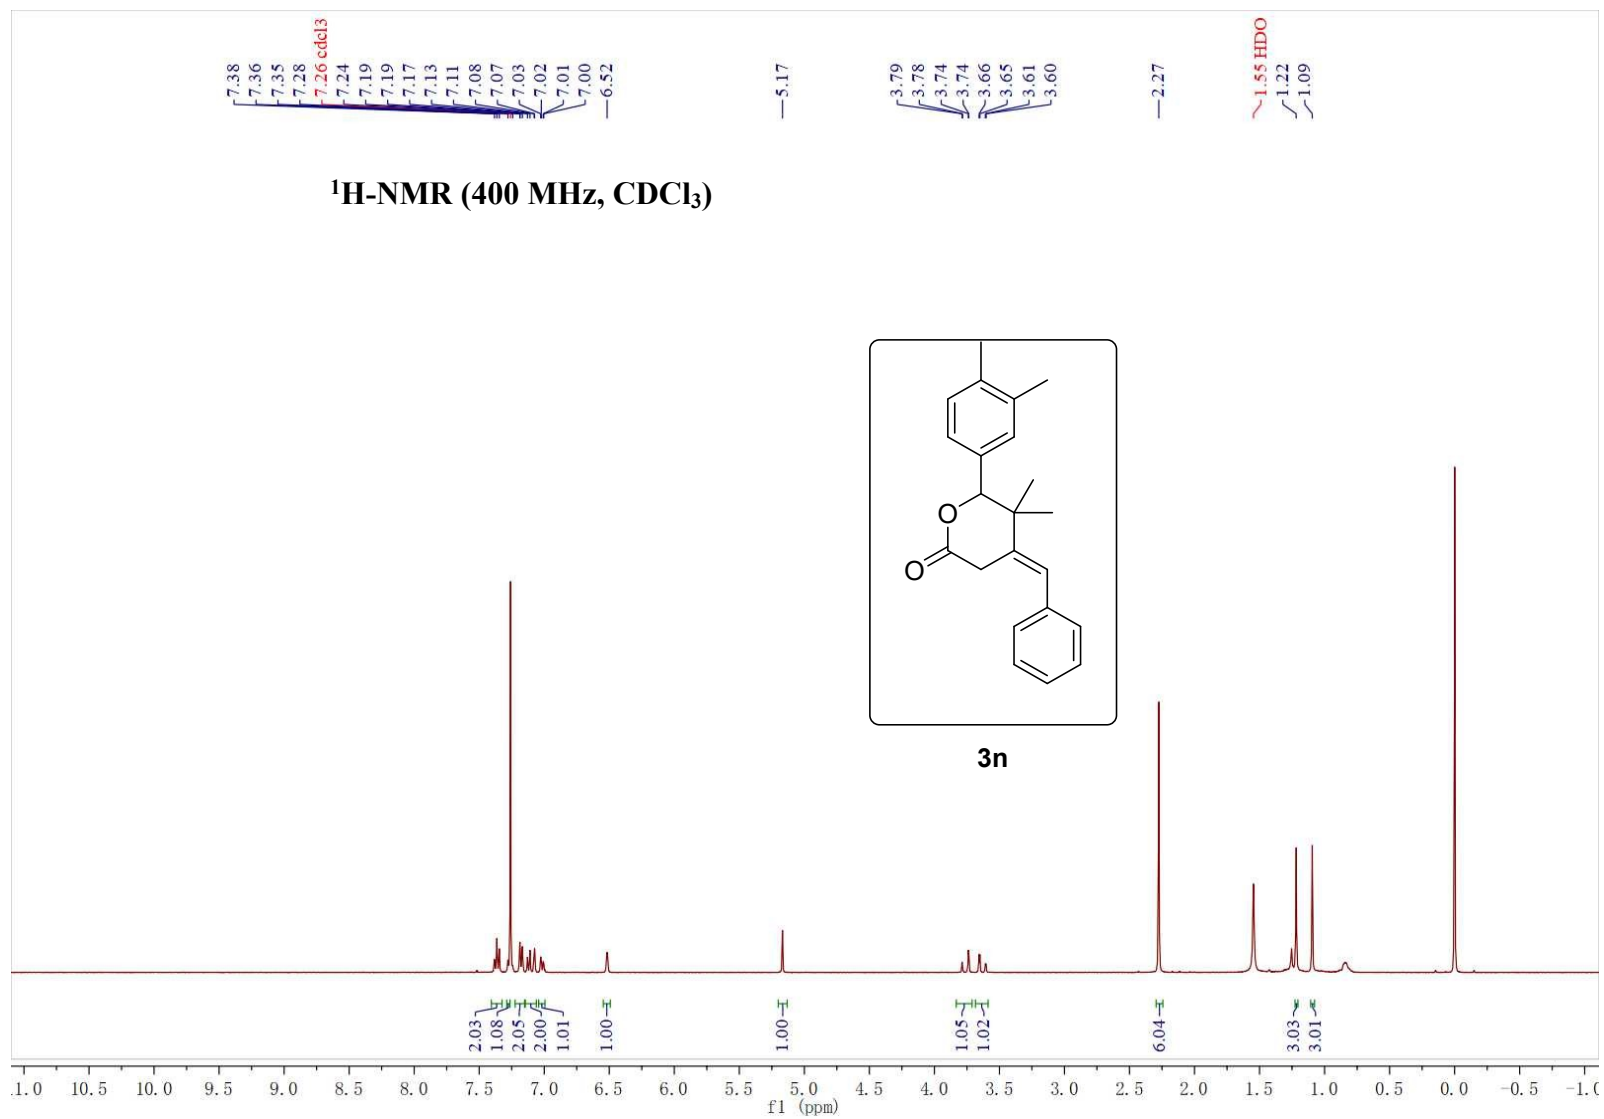

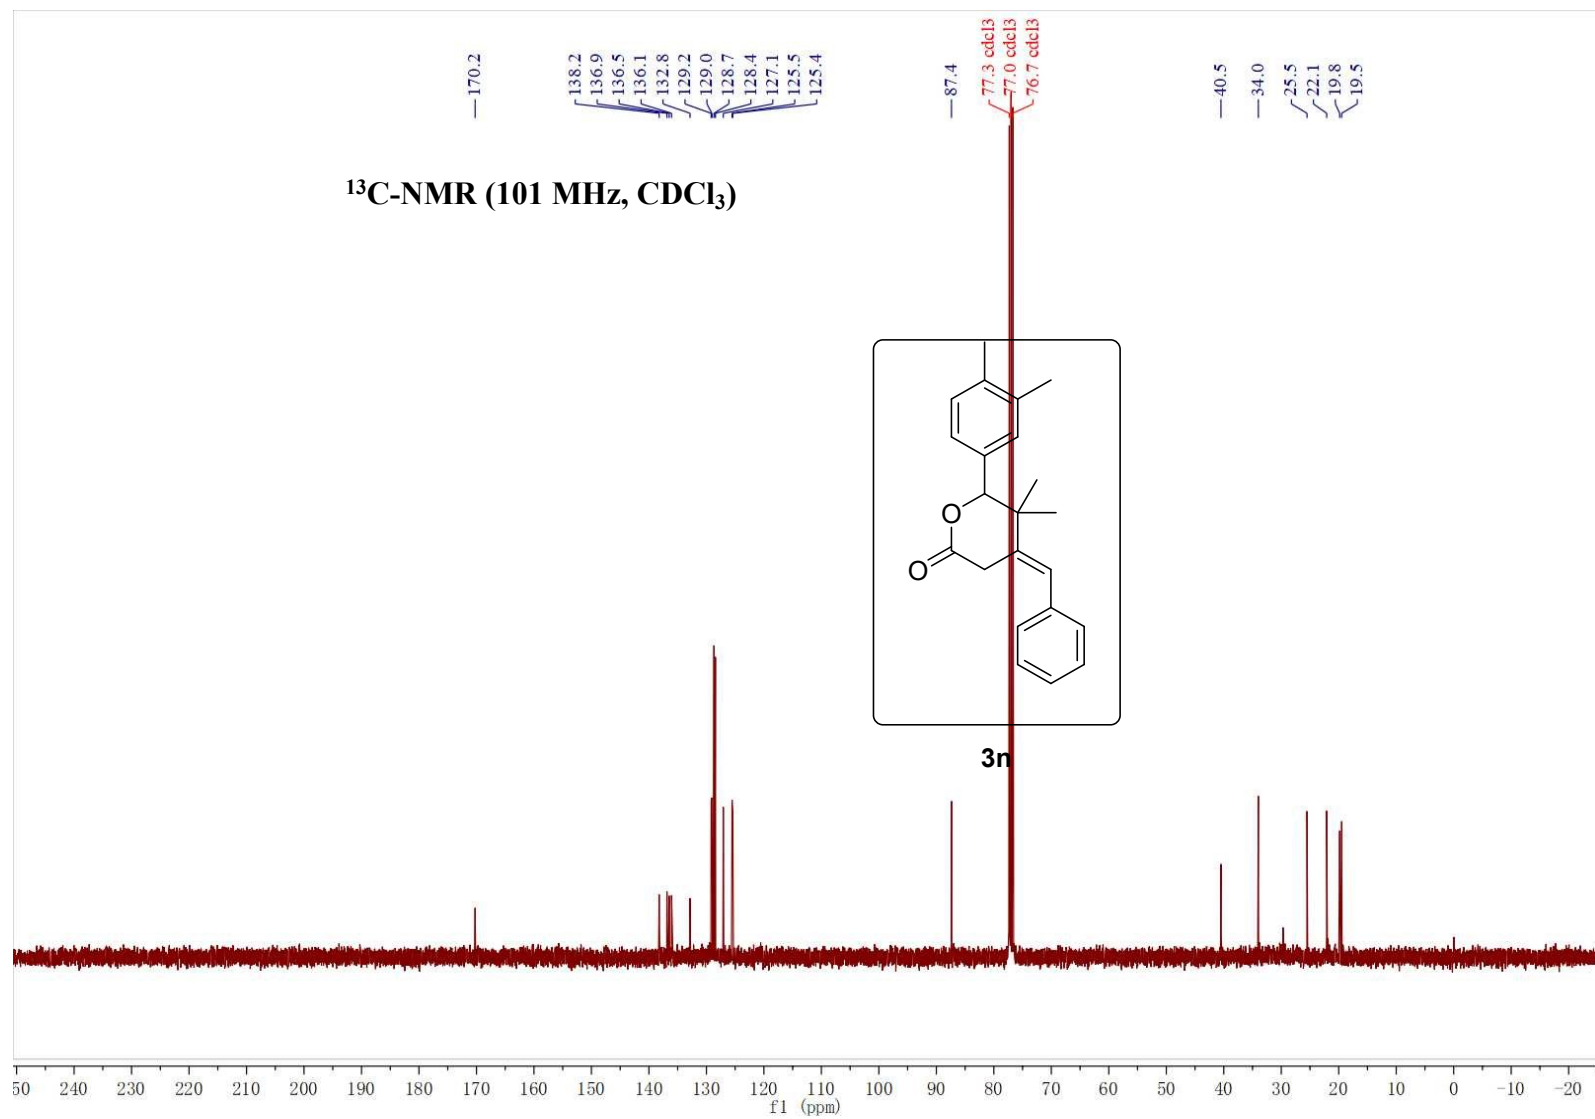

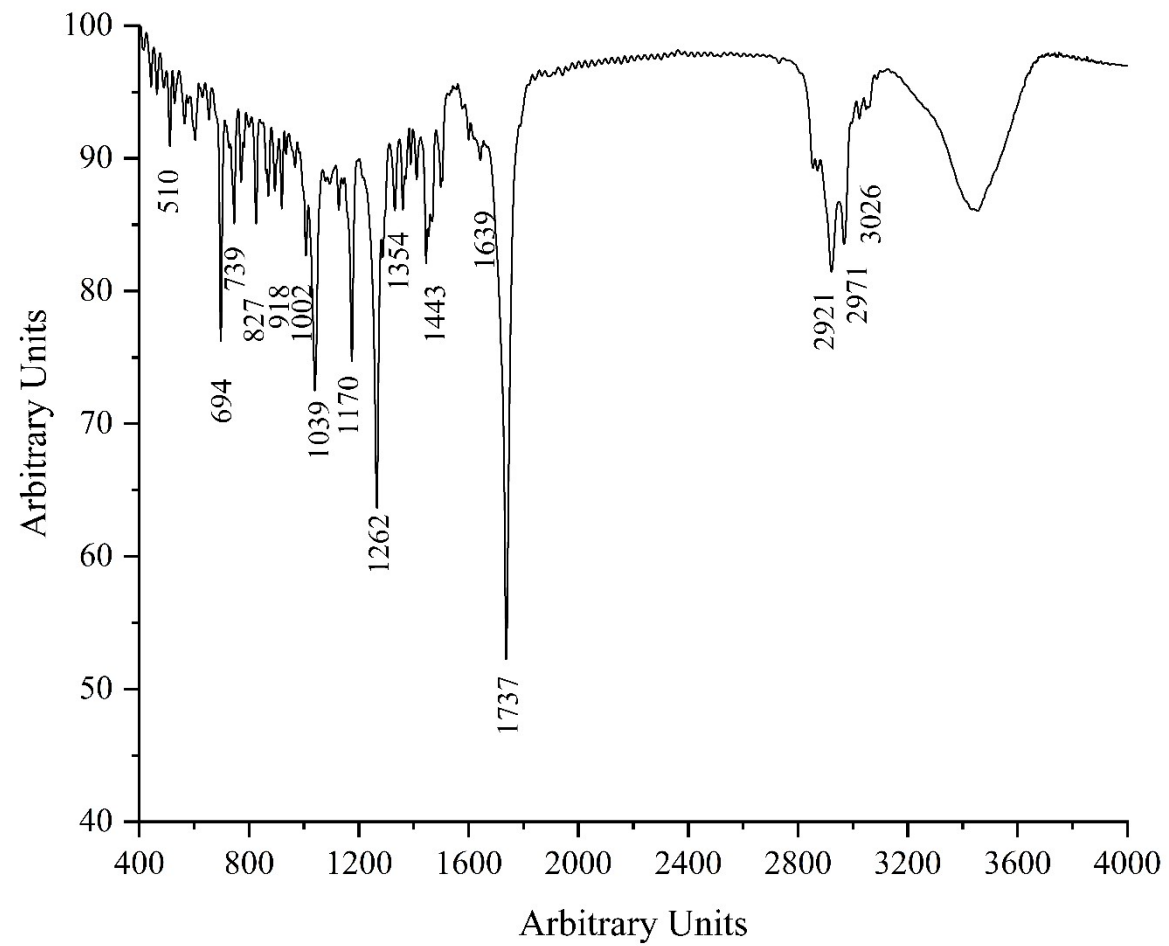



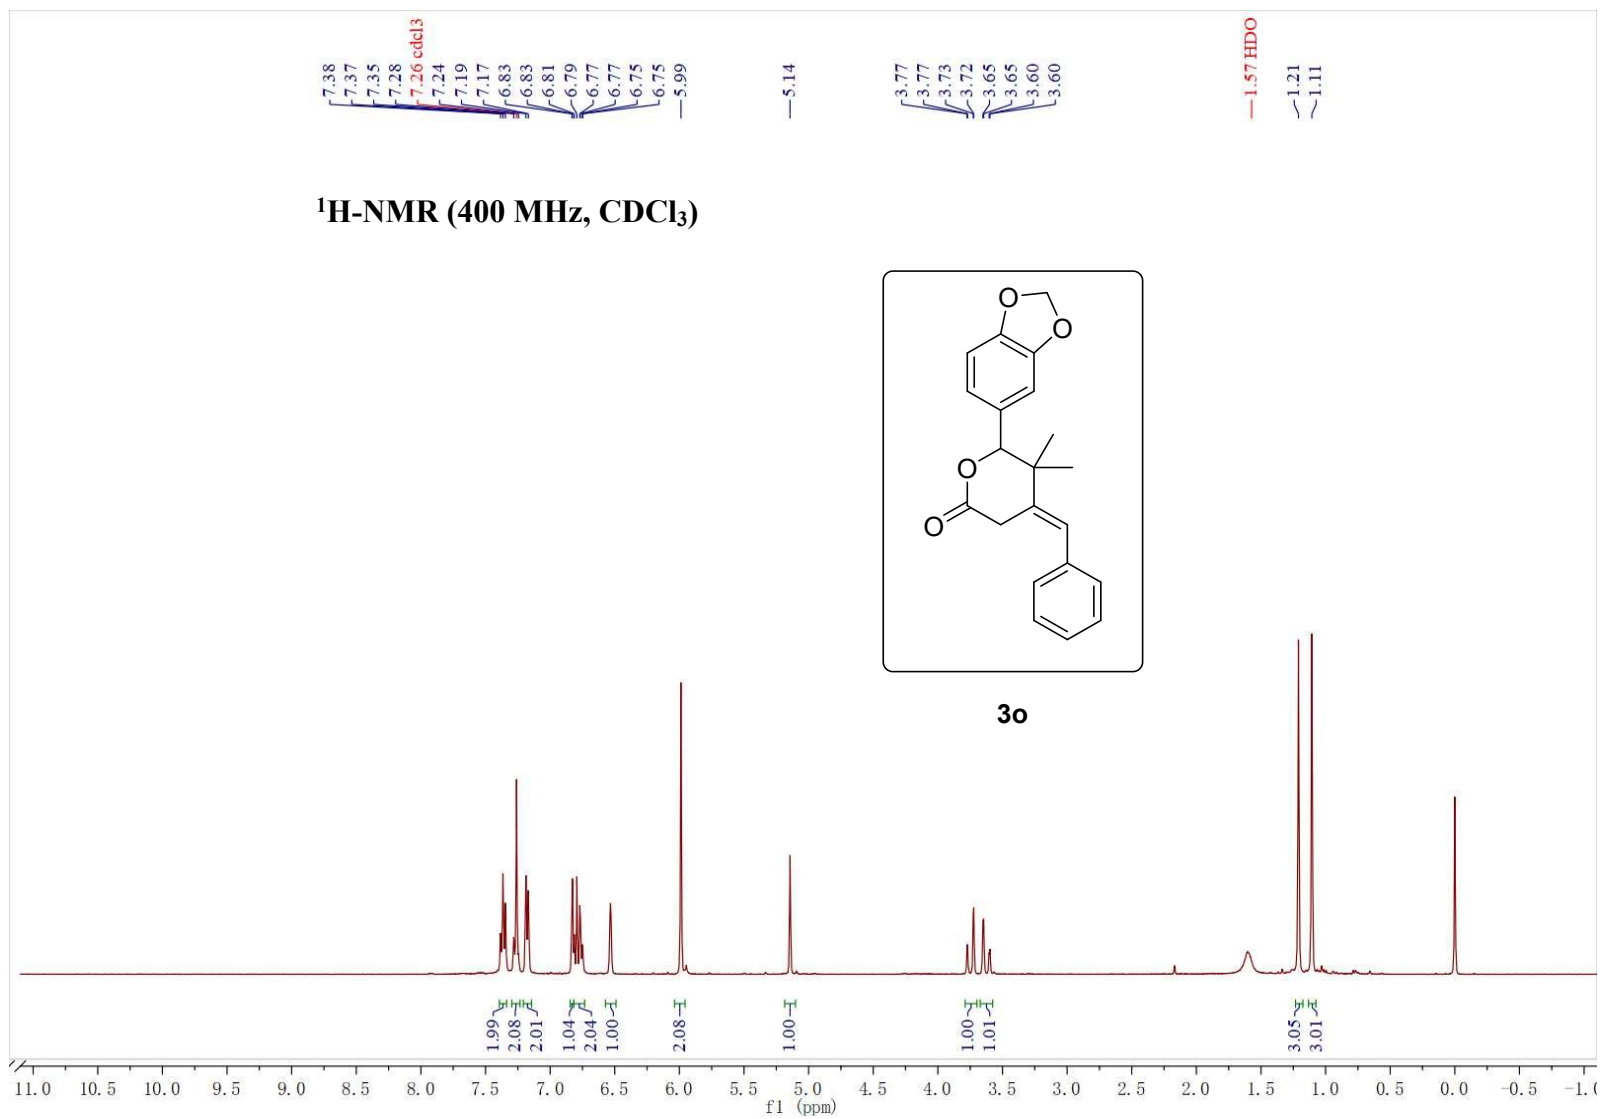

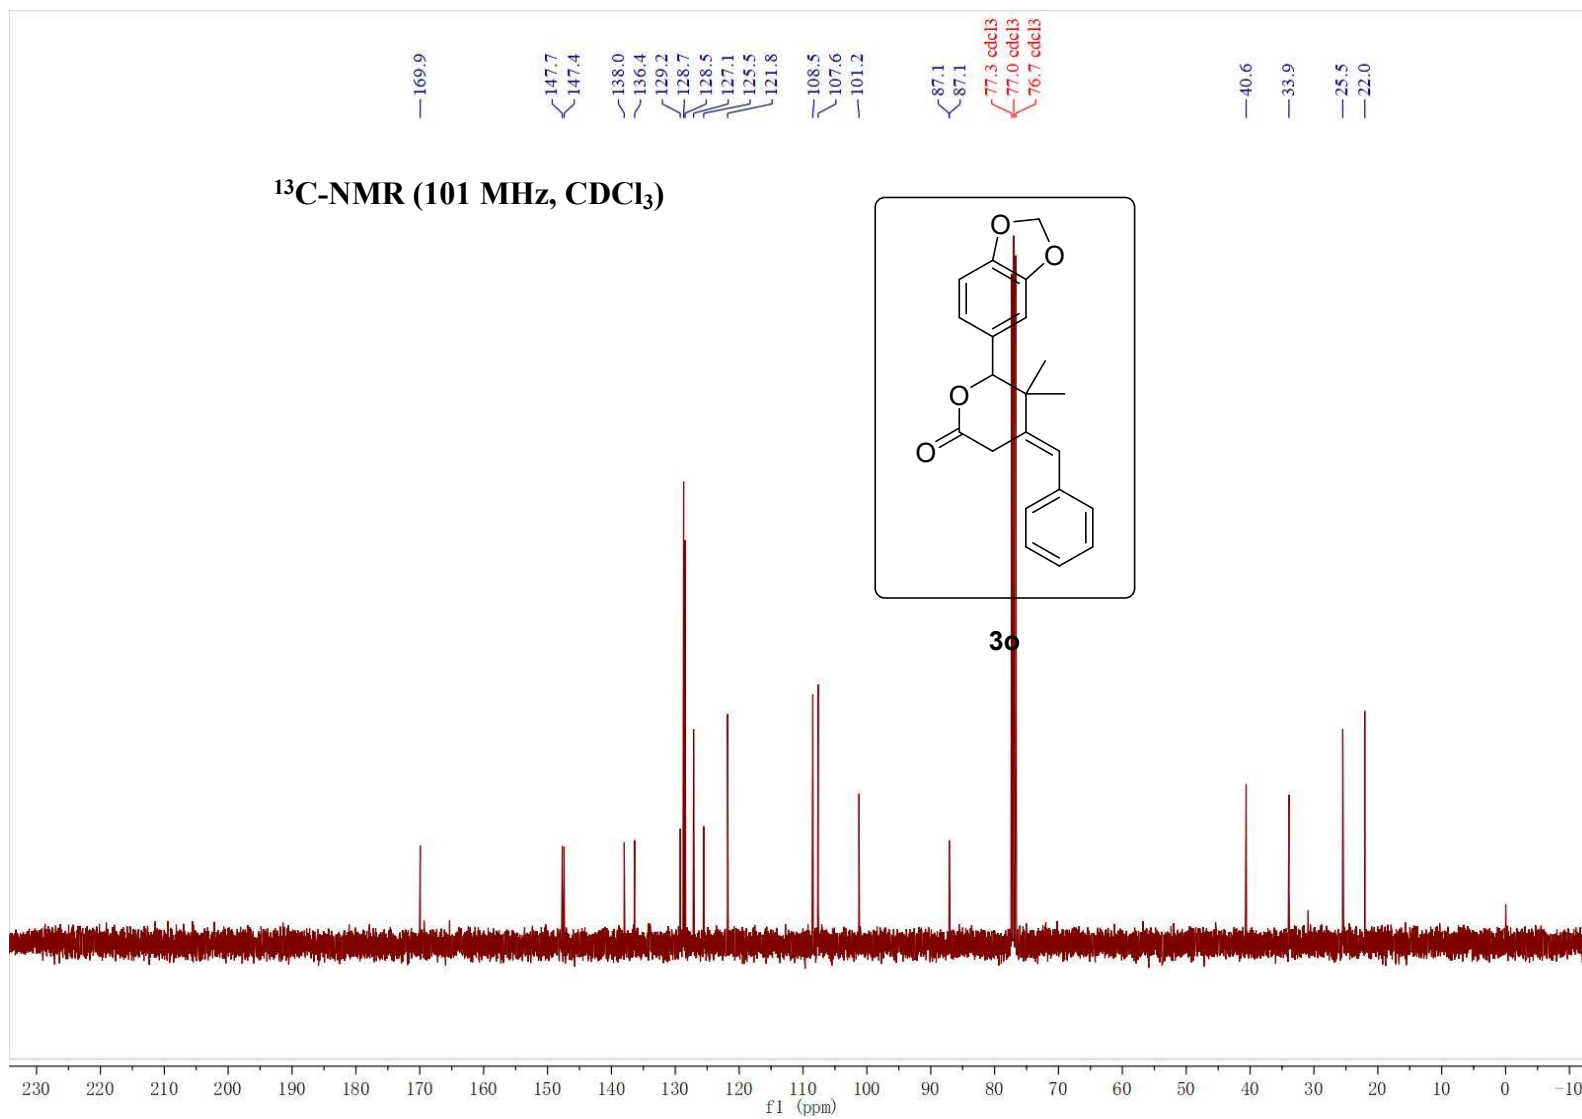

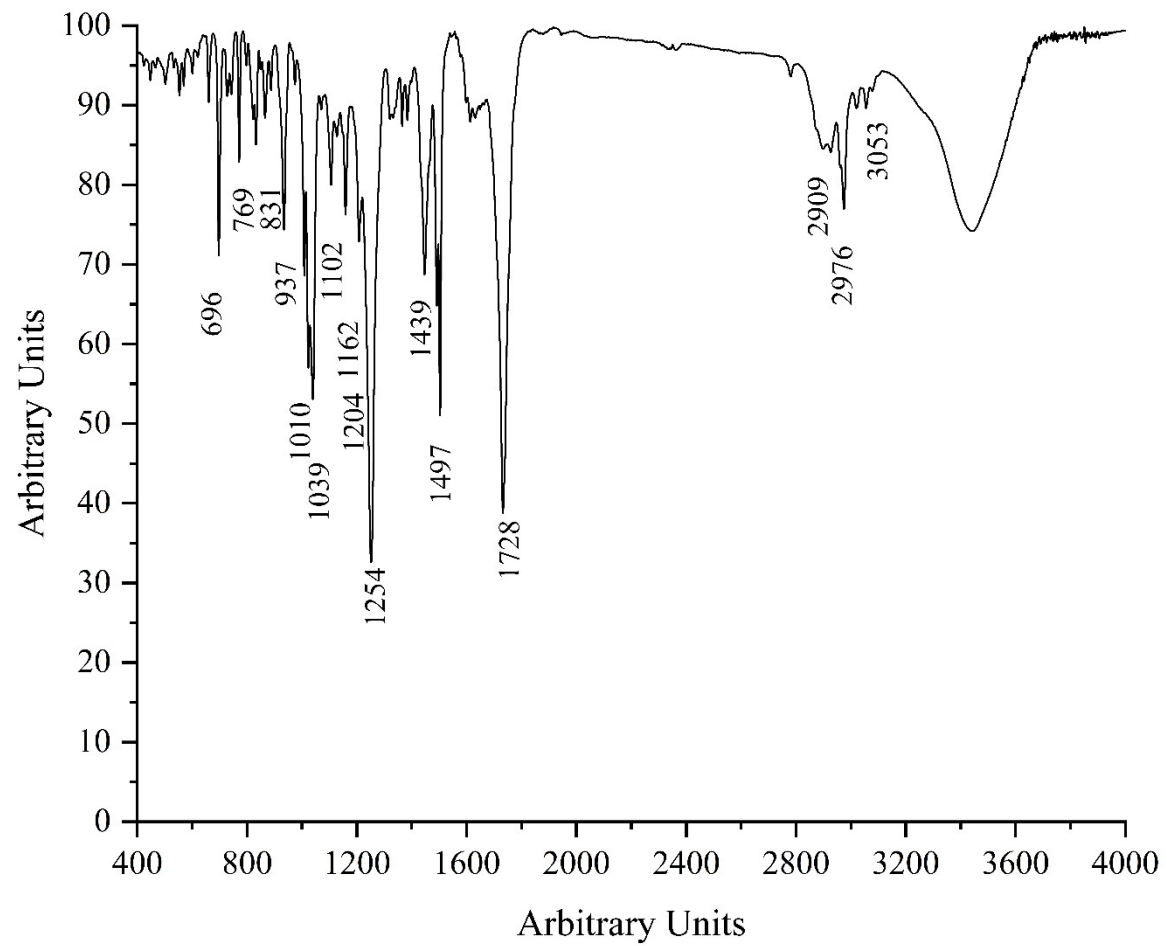

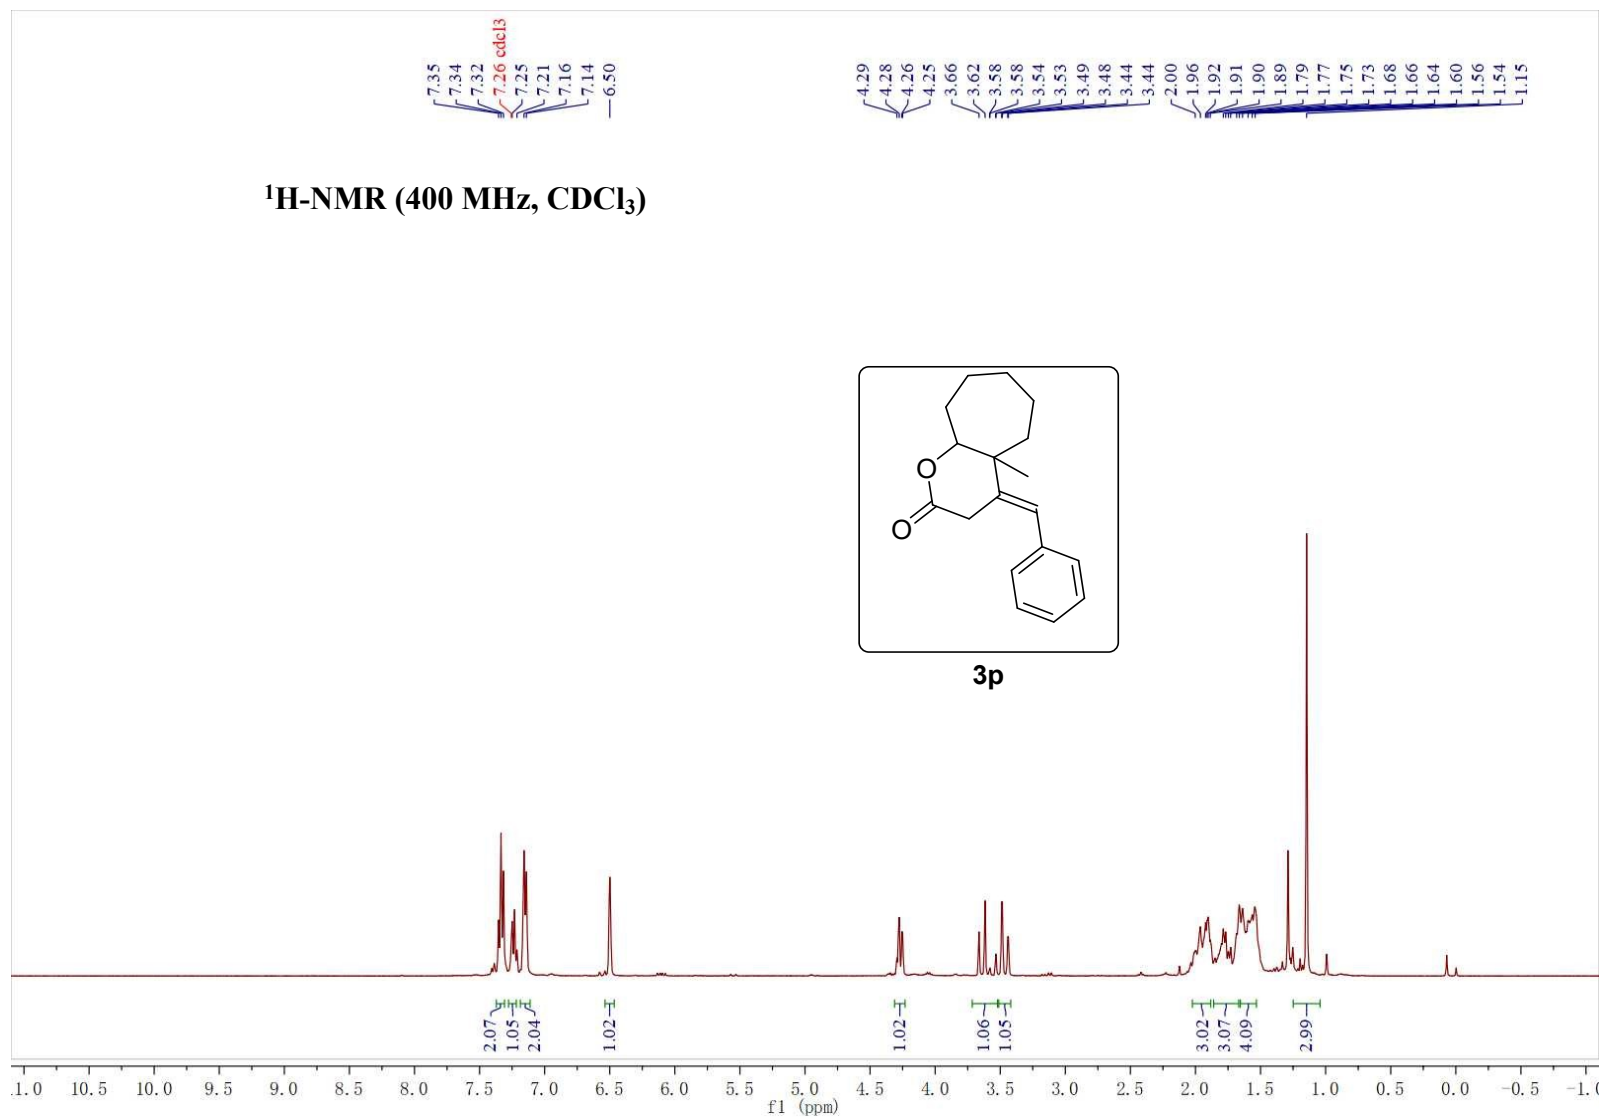

**<sup>13</sup>C-NMR (101 MHz, CDCl<sub>3</sub>)**

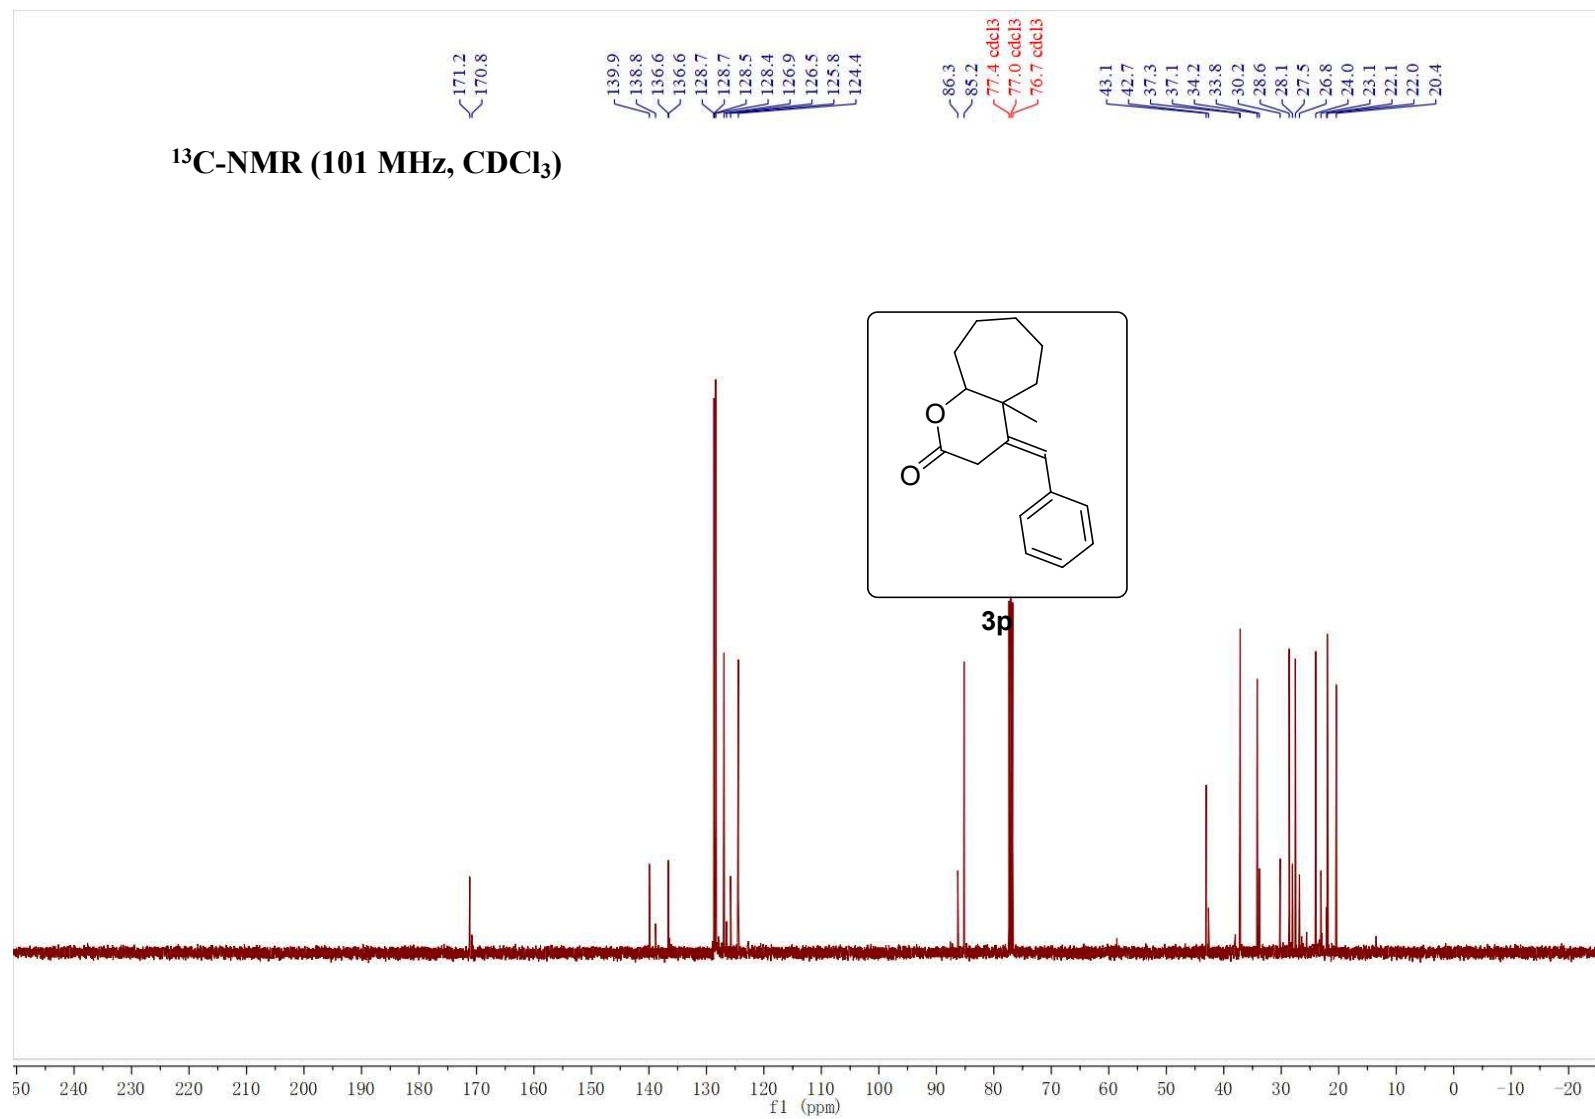

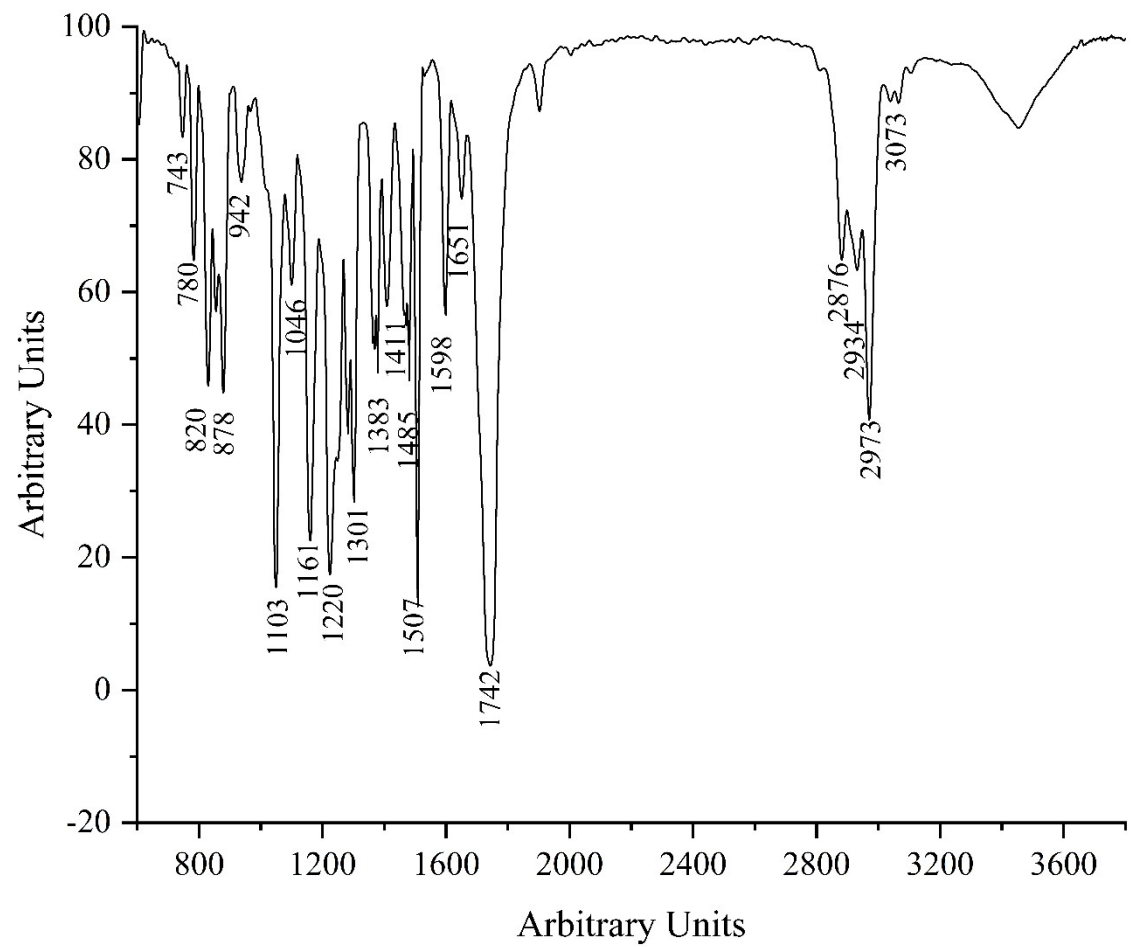

**<sup>1</sup>H-NMR (400 MHz, CDCl<sub>3</sub>)**

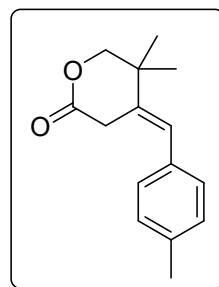

**3q**

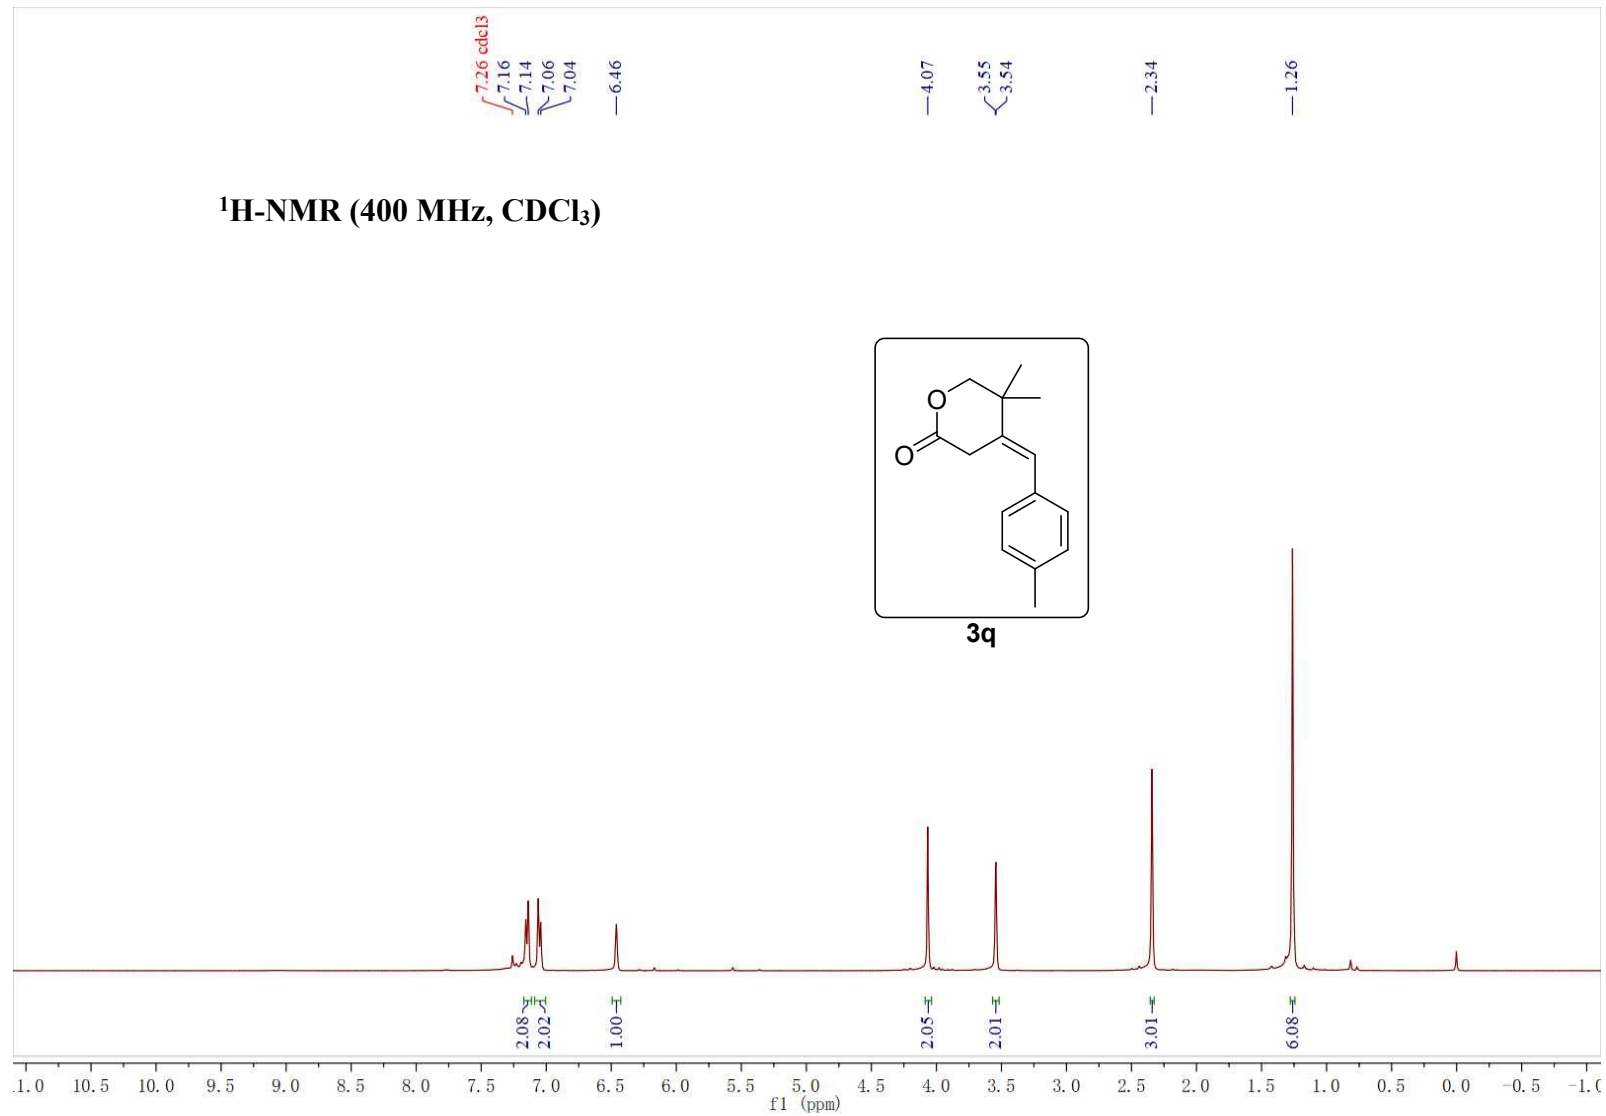

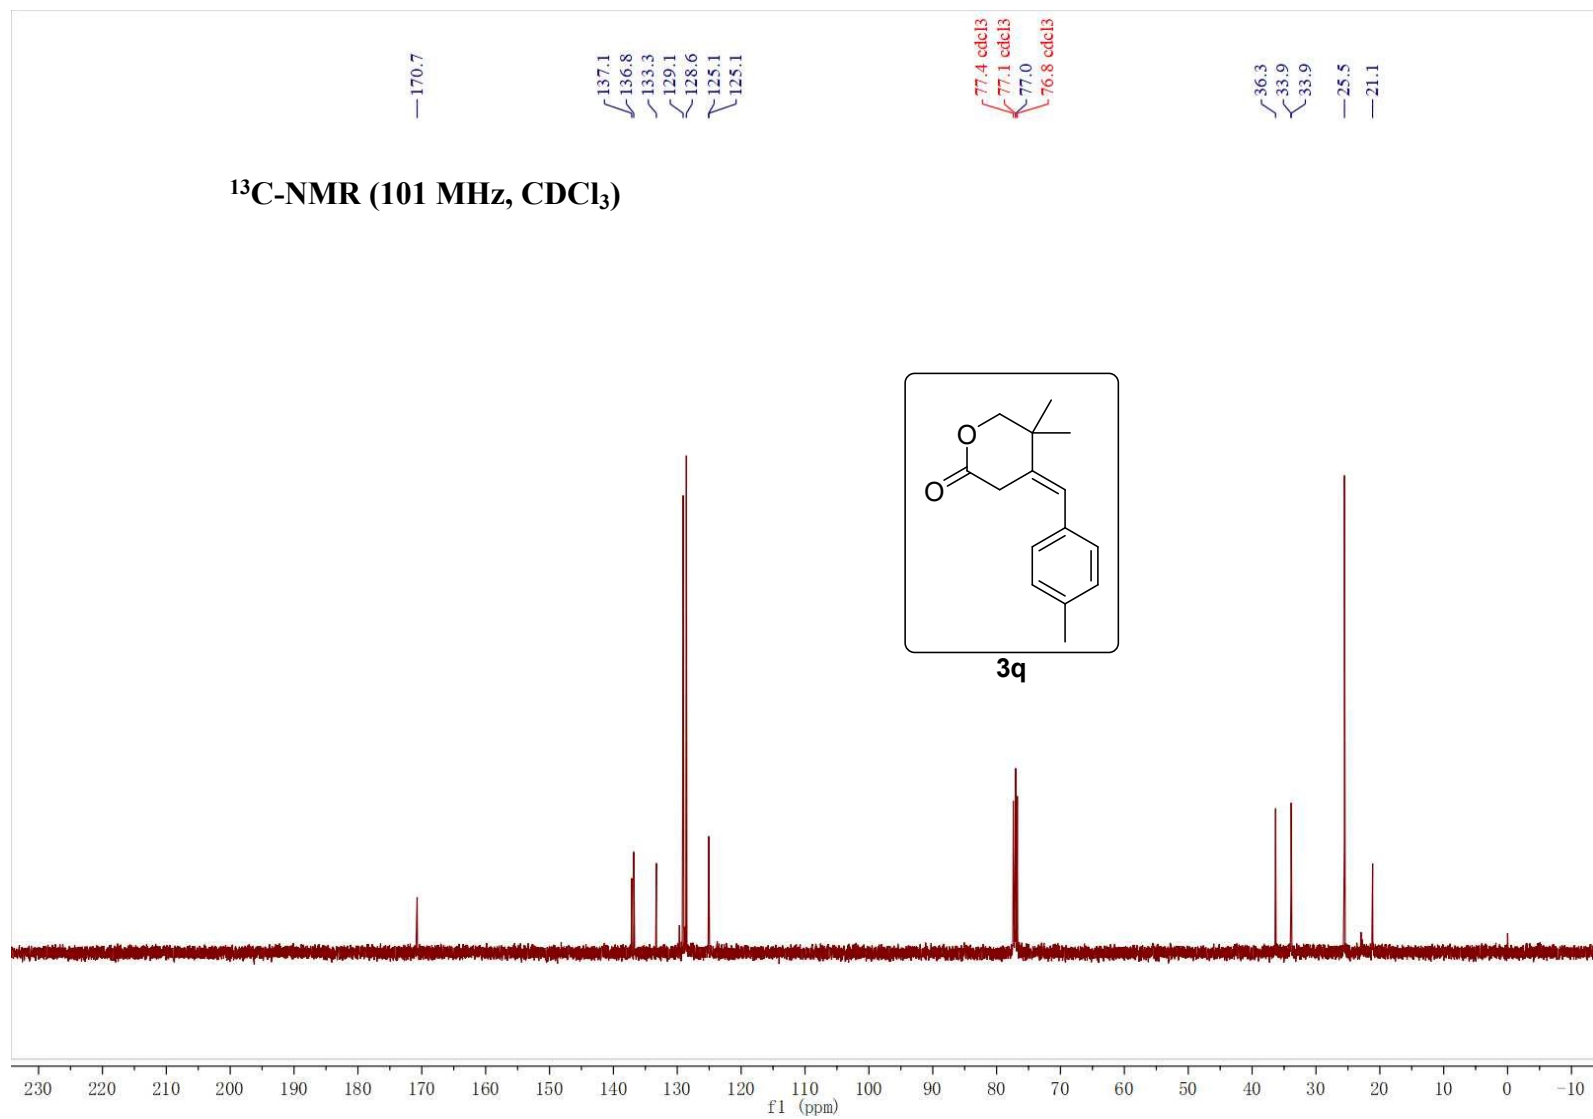



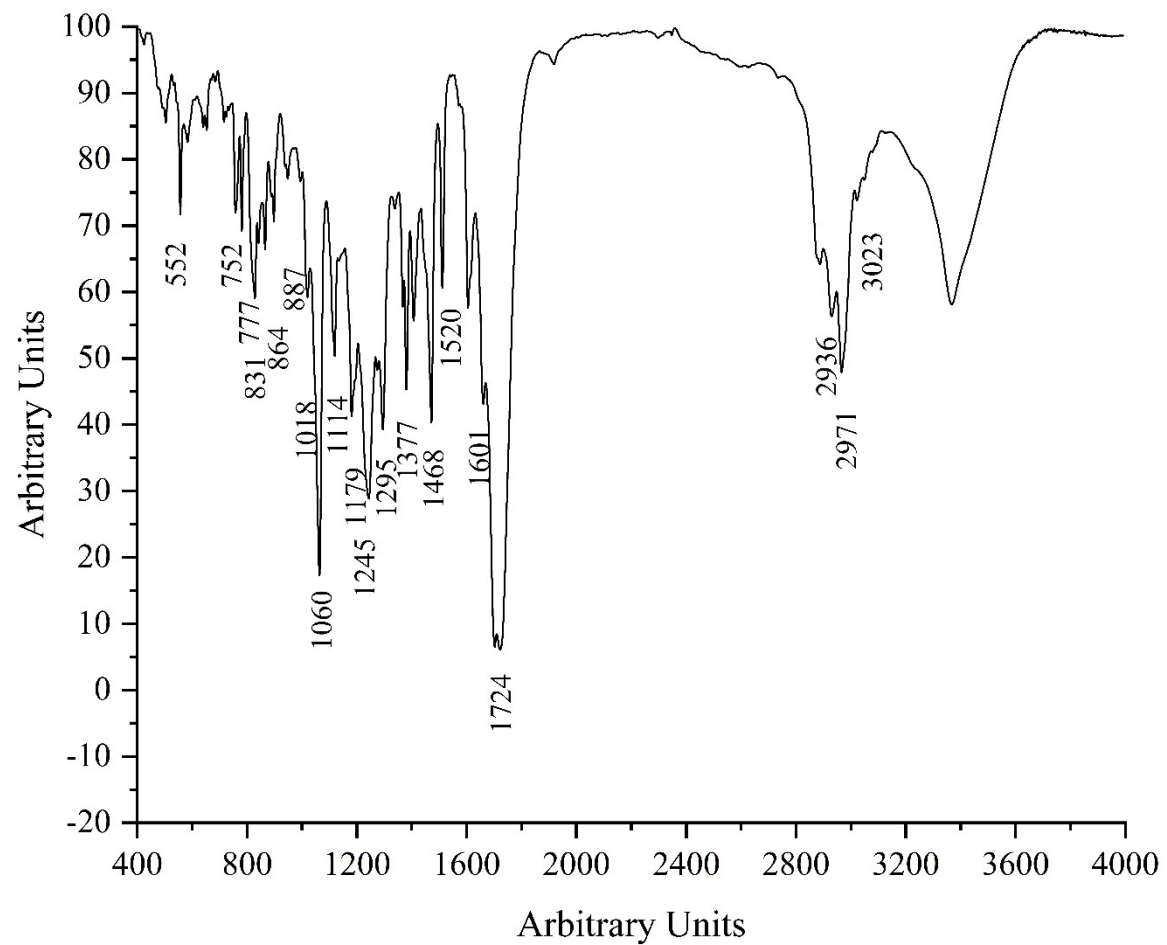

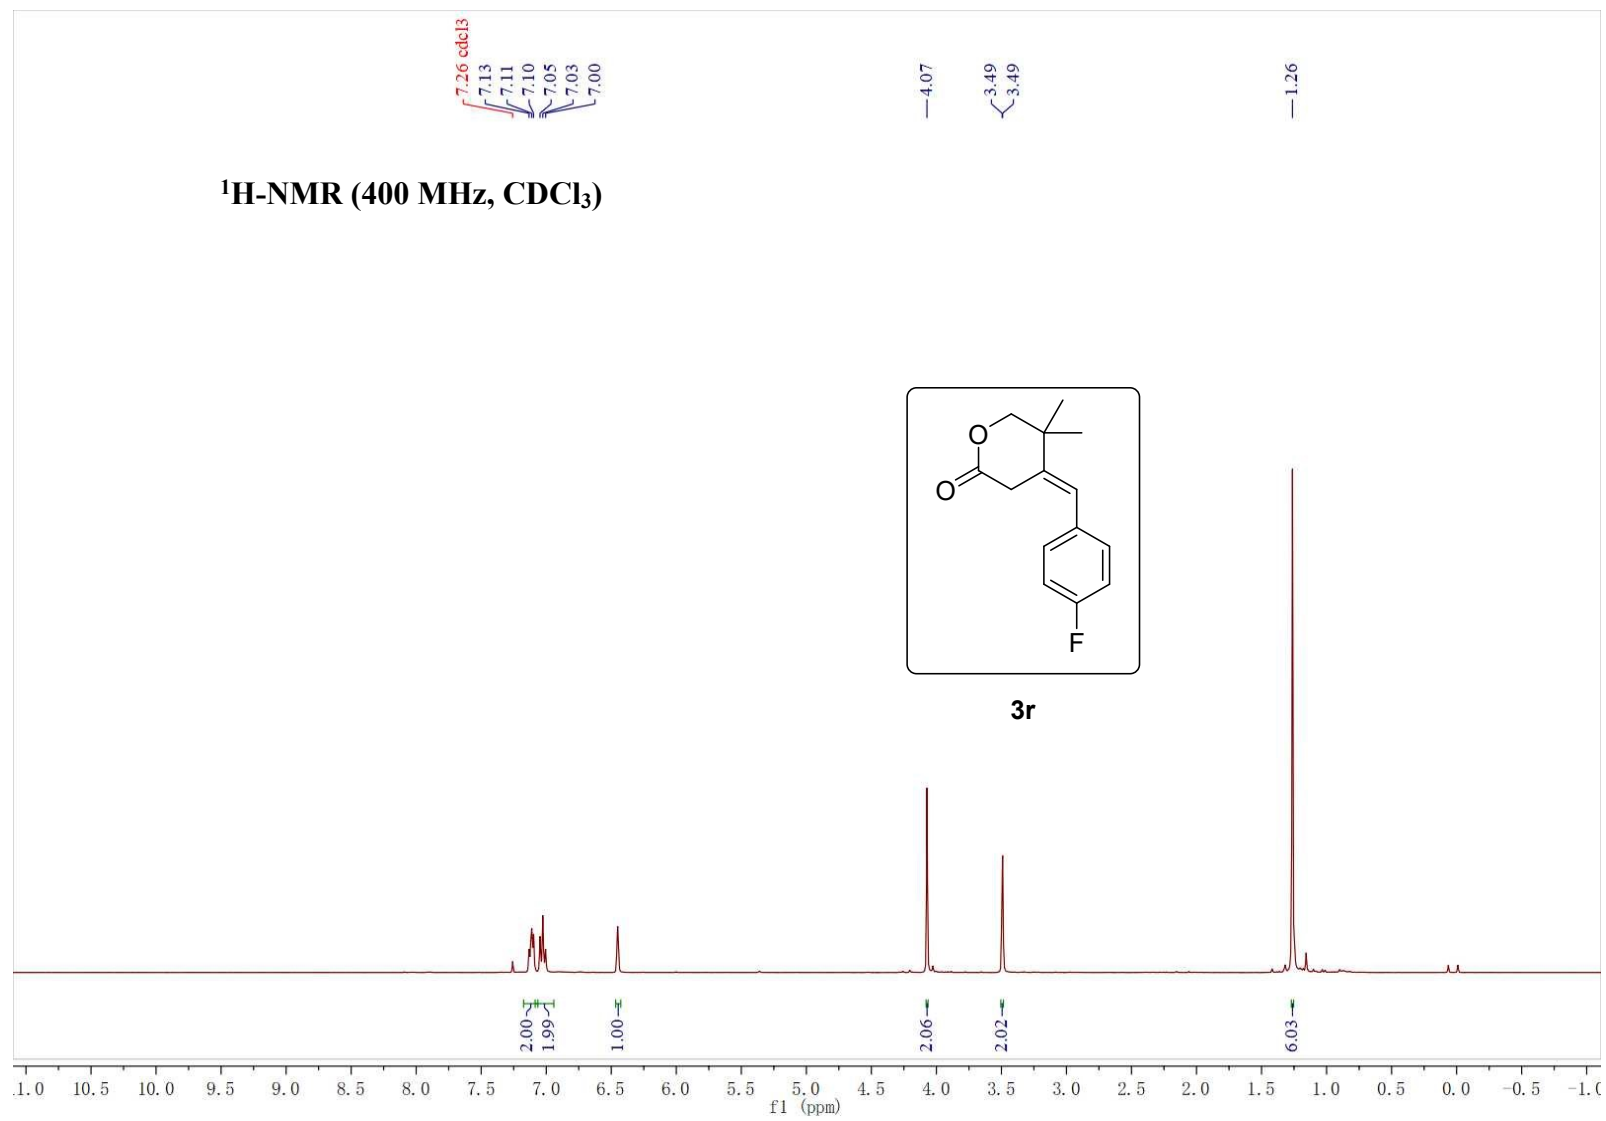

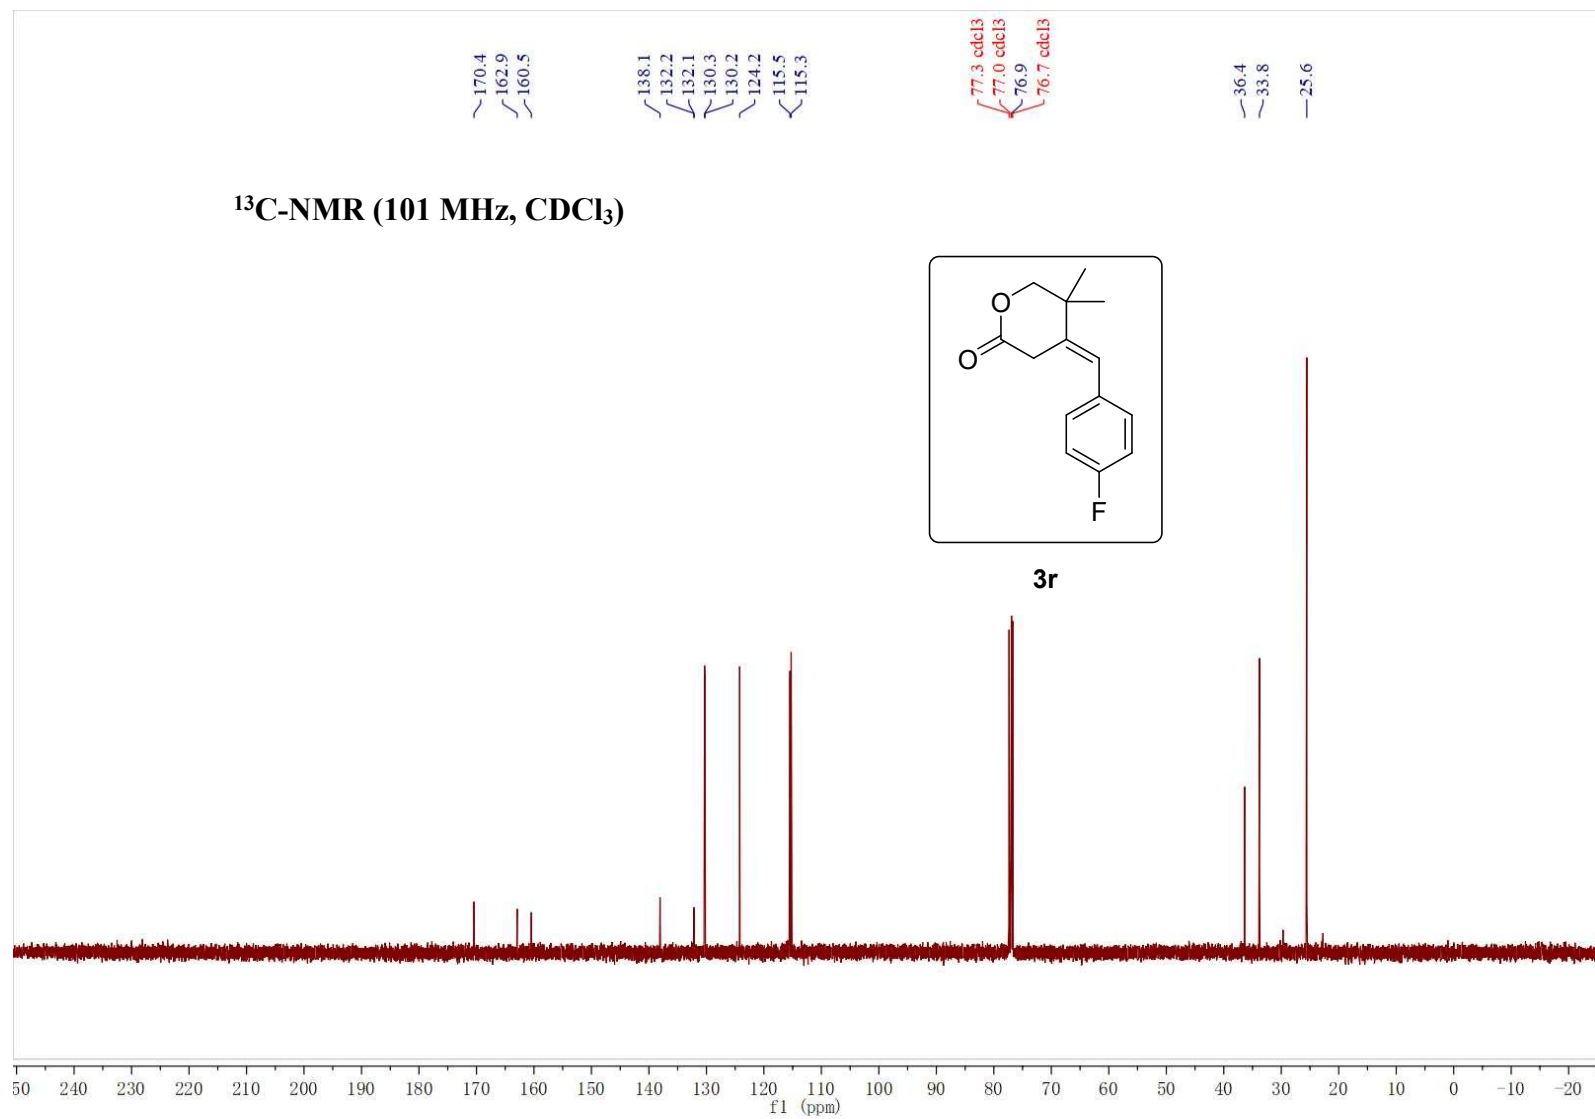

**$^{19}\text{F}$ -NMR (376 MHz,  $\text{CDCl}_3$ )**

—114.71

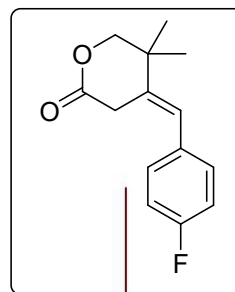

**3r**

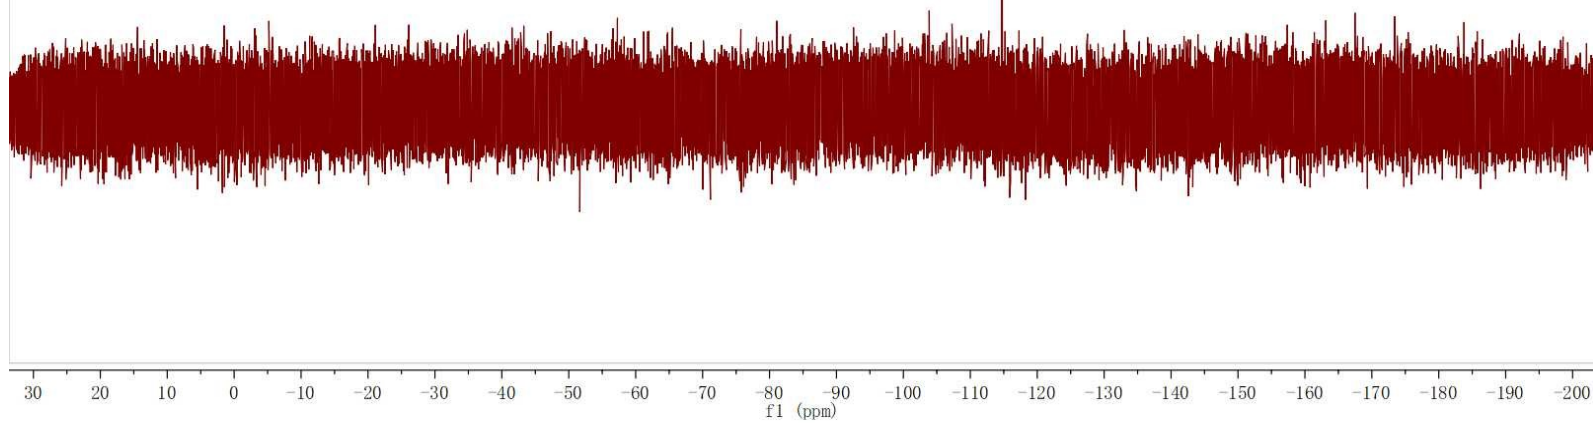

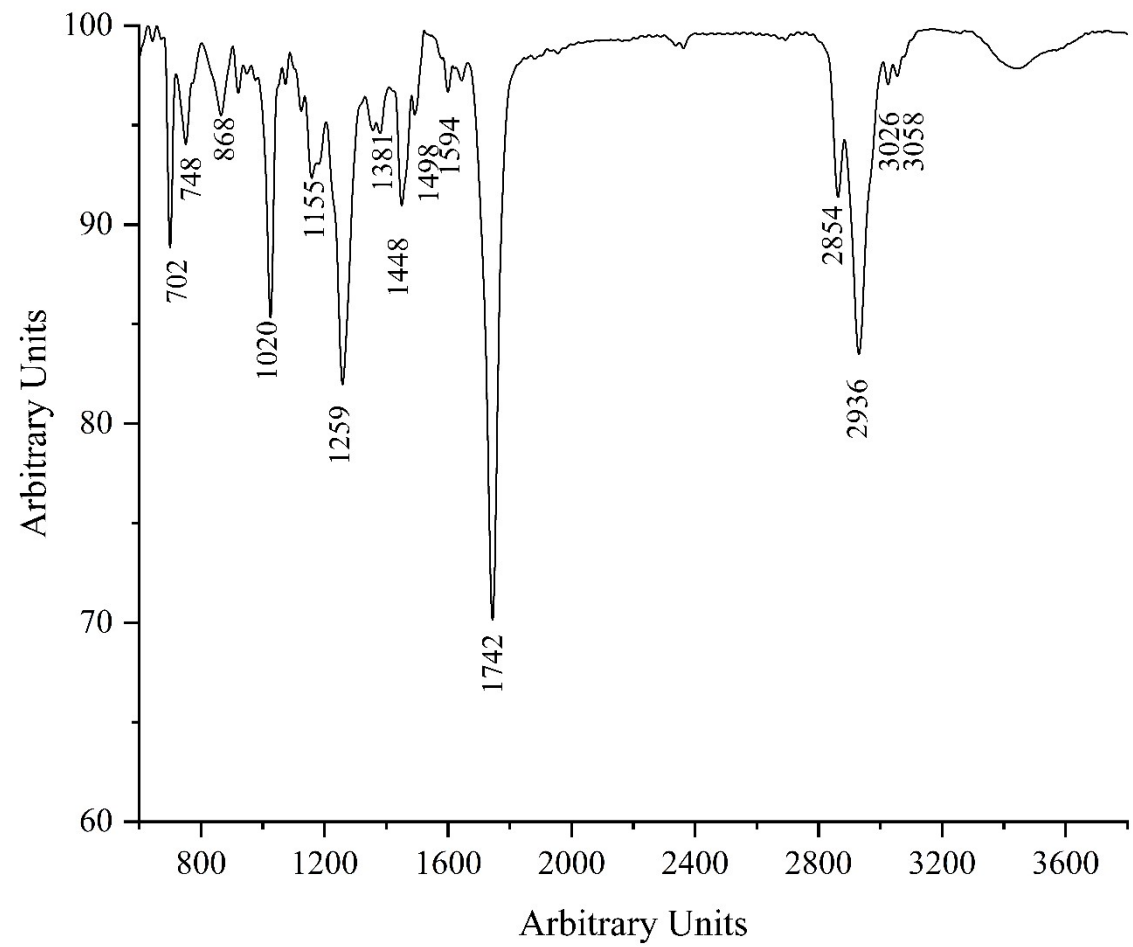

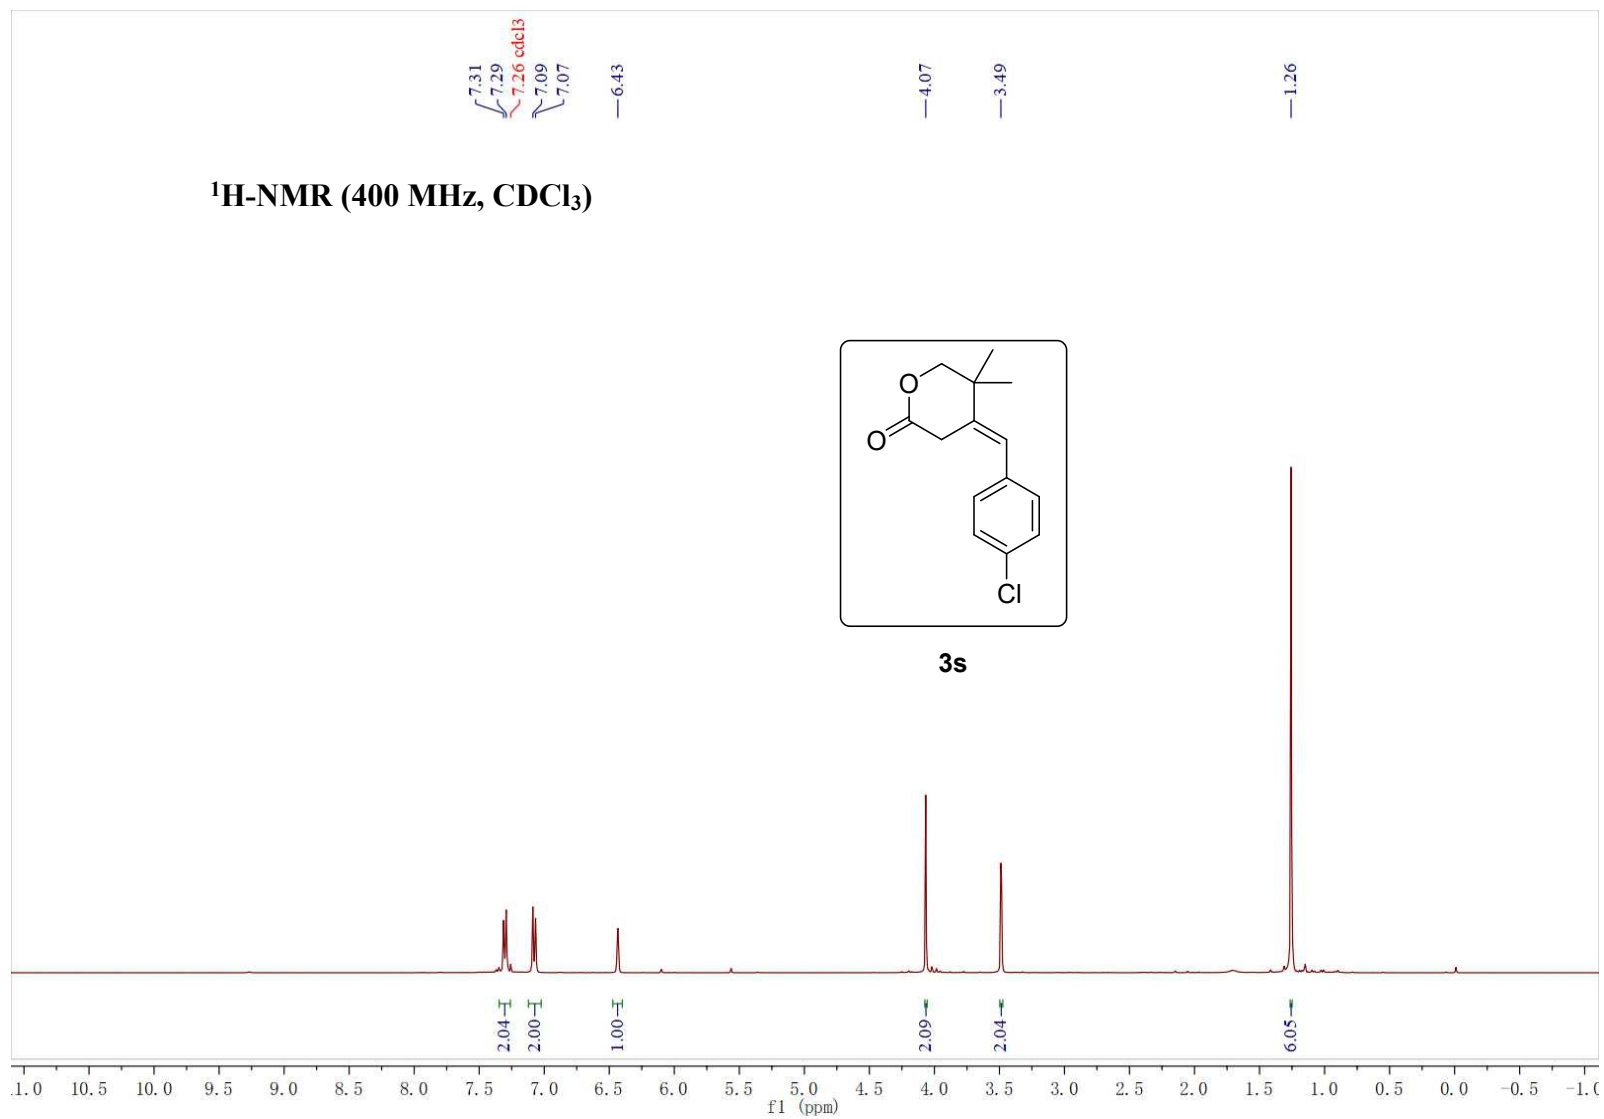

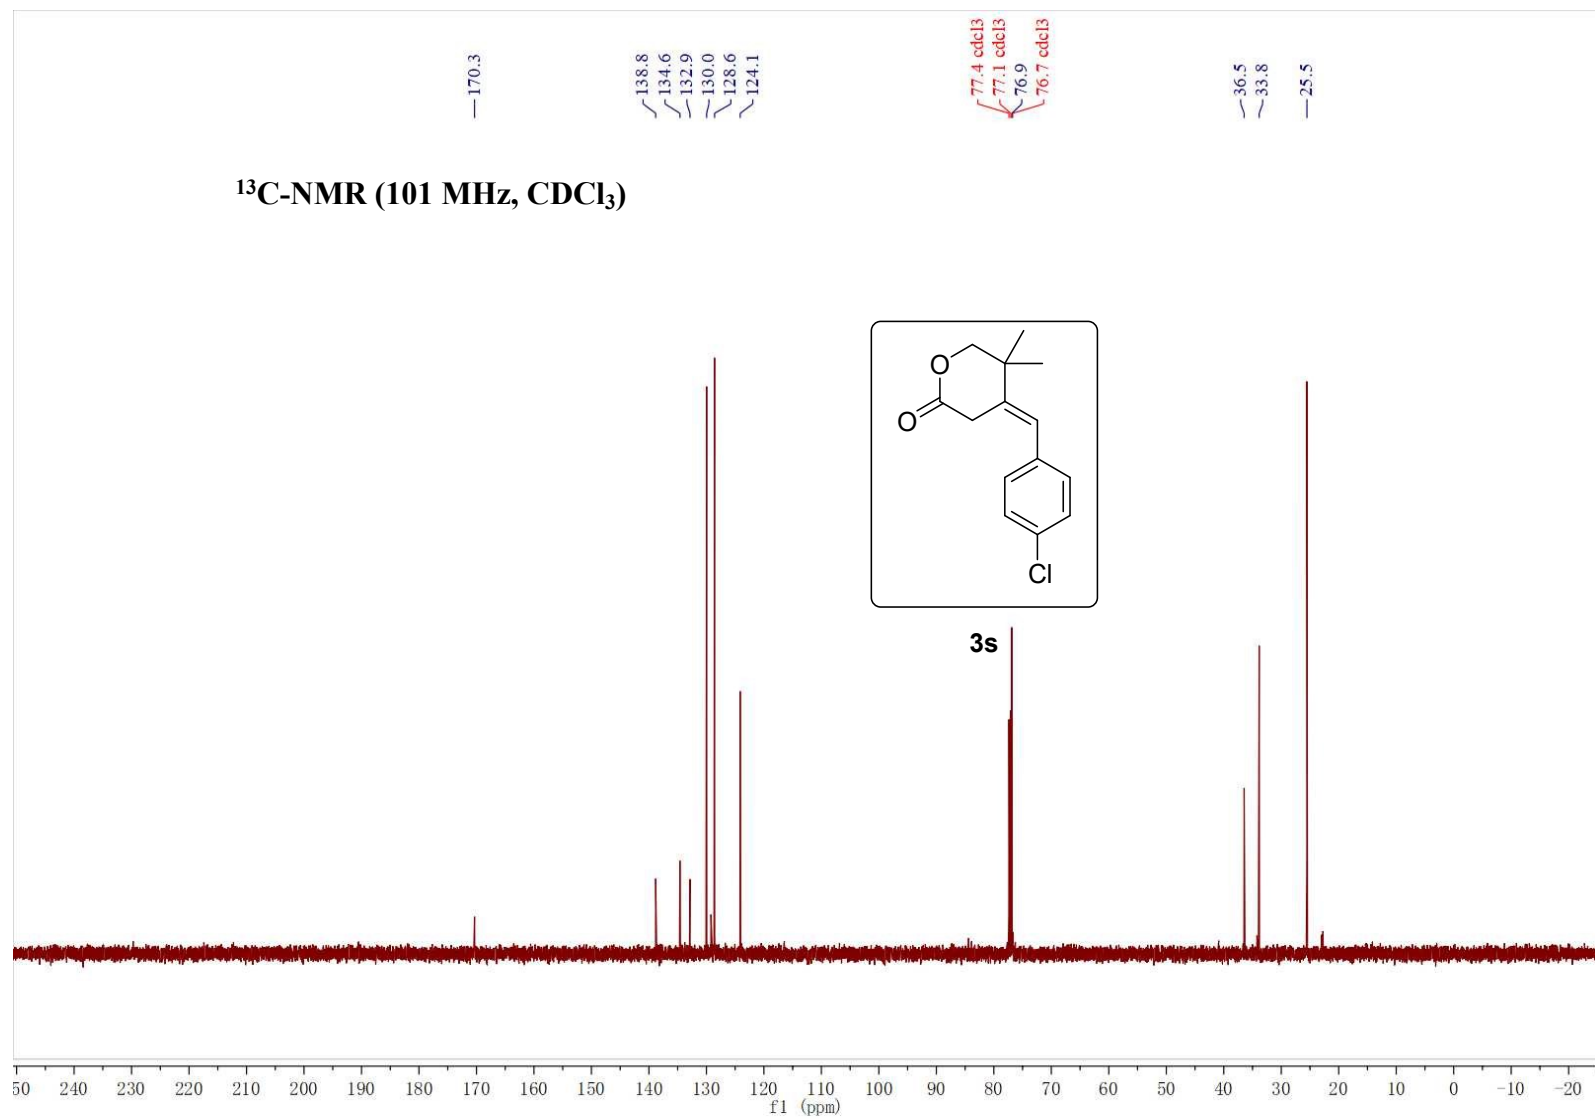

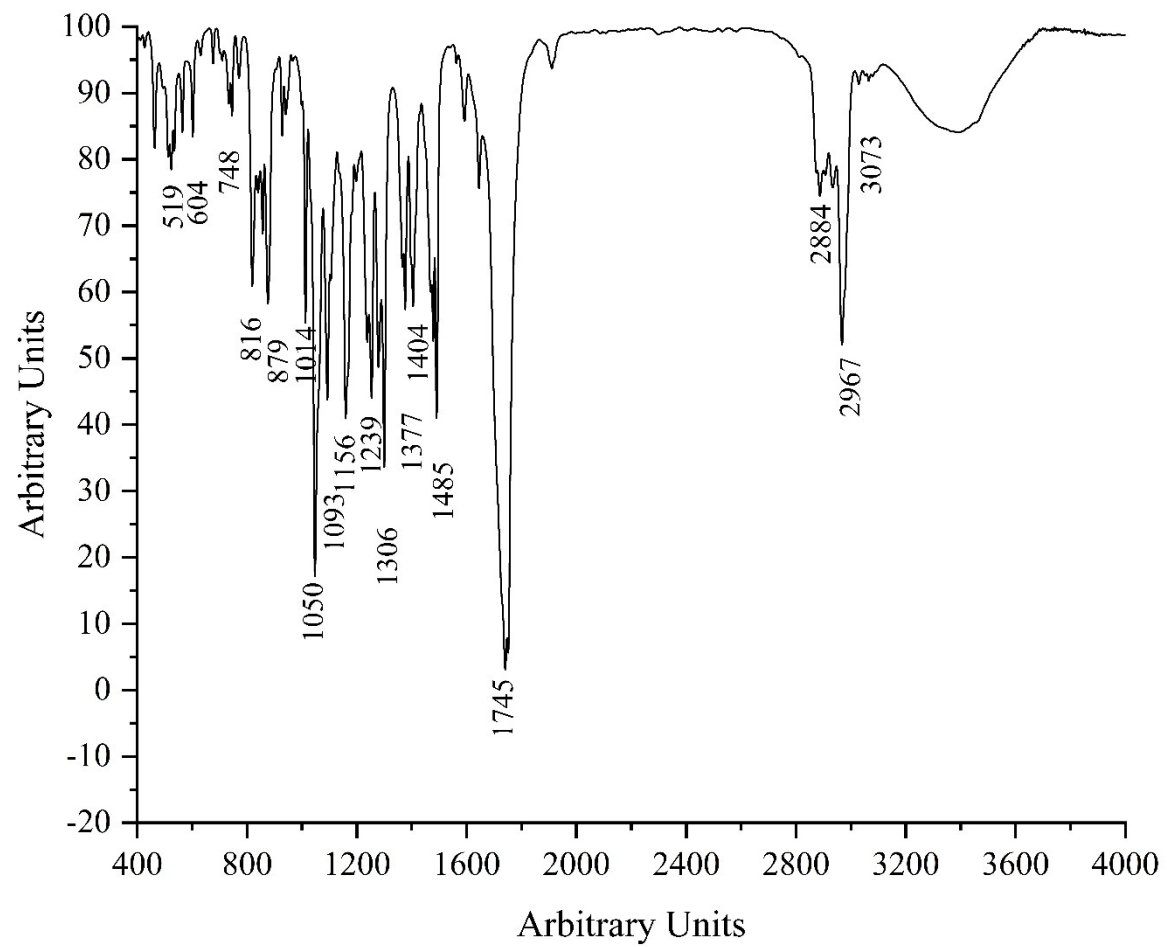



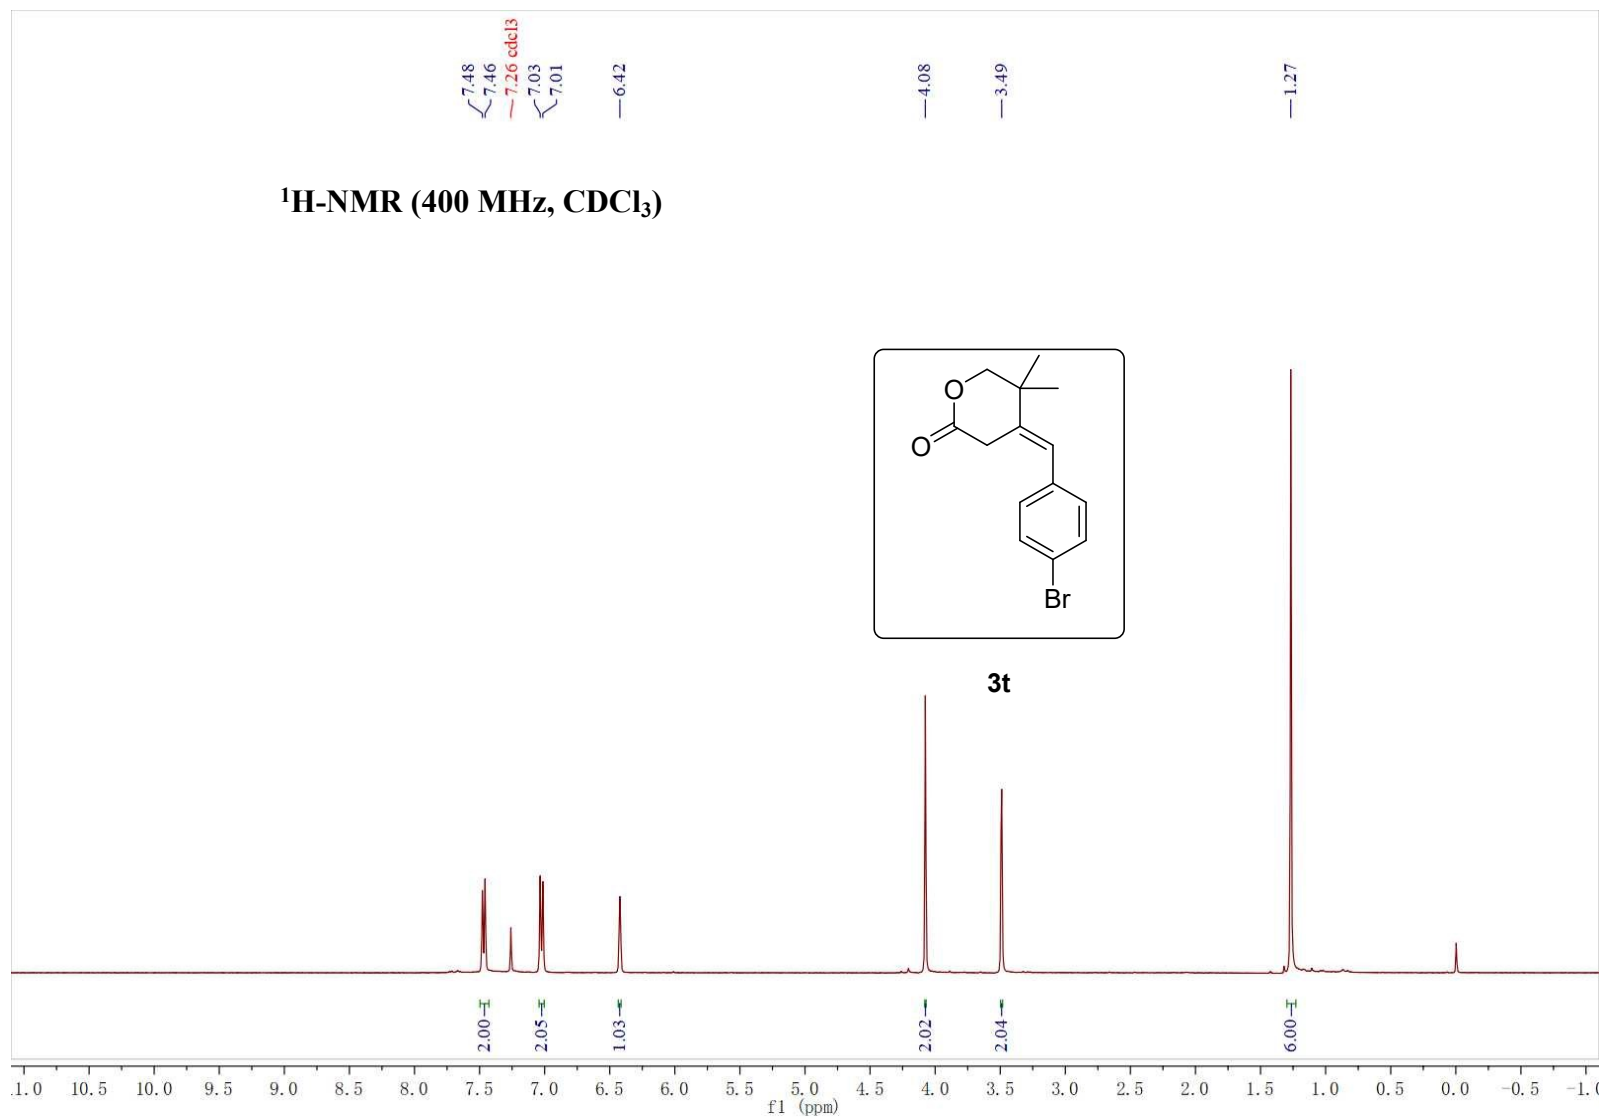

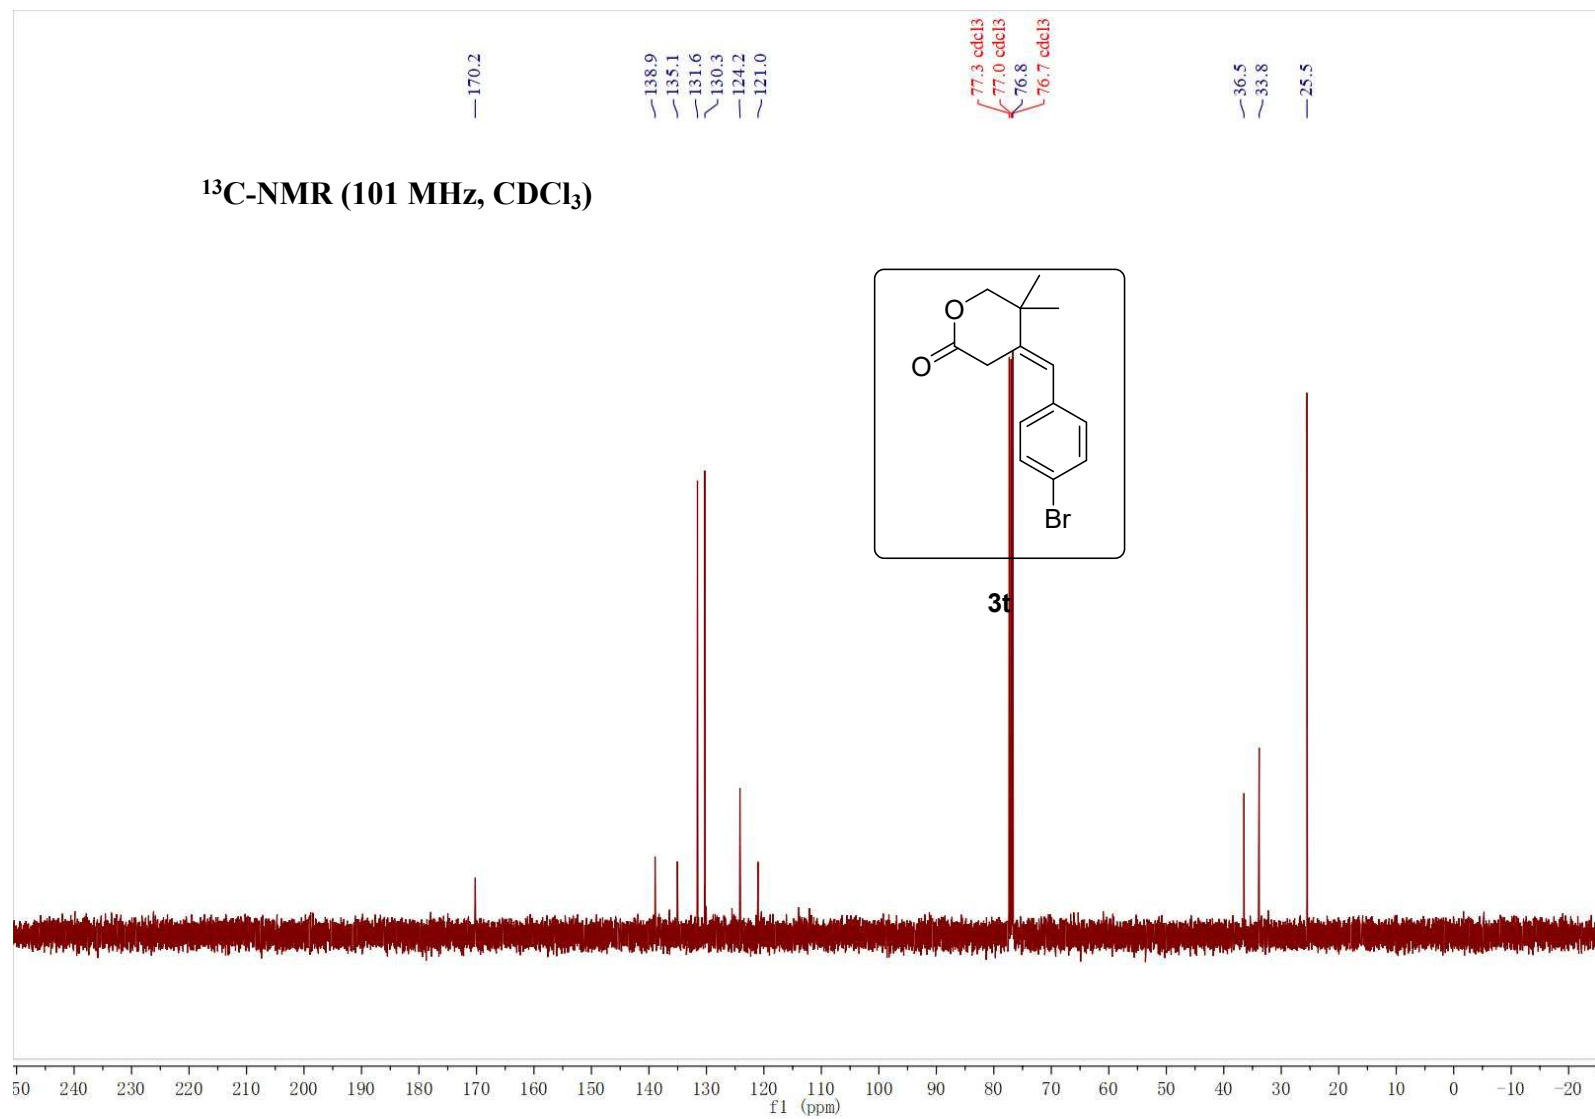

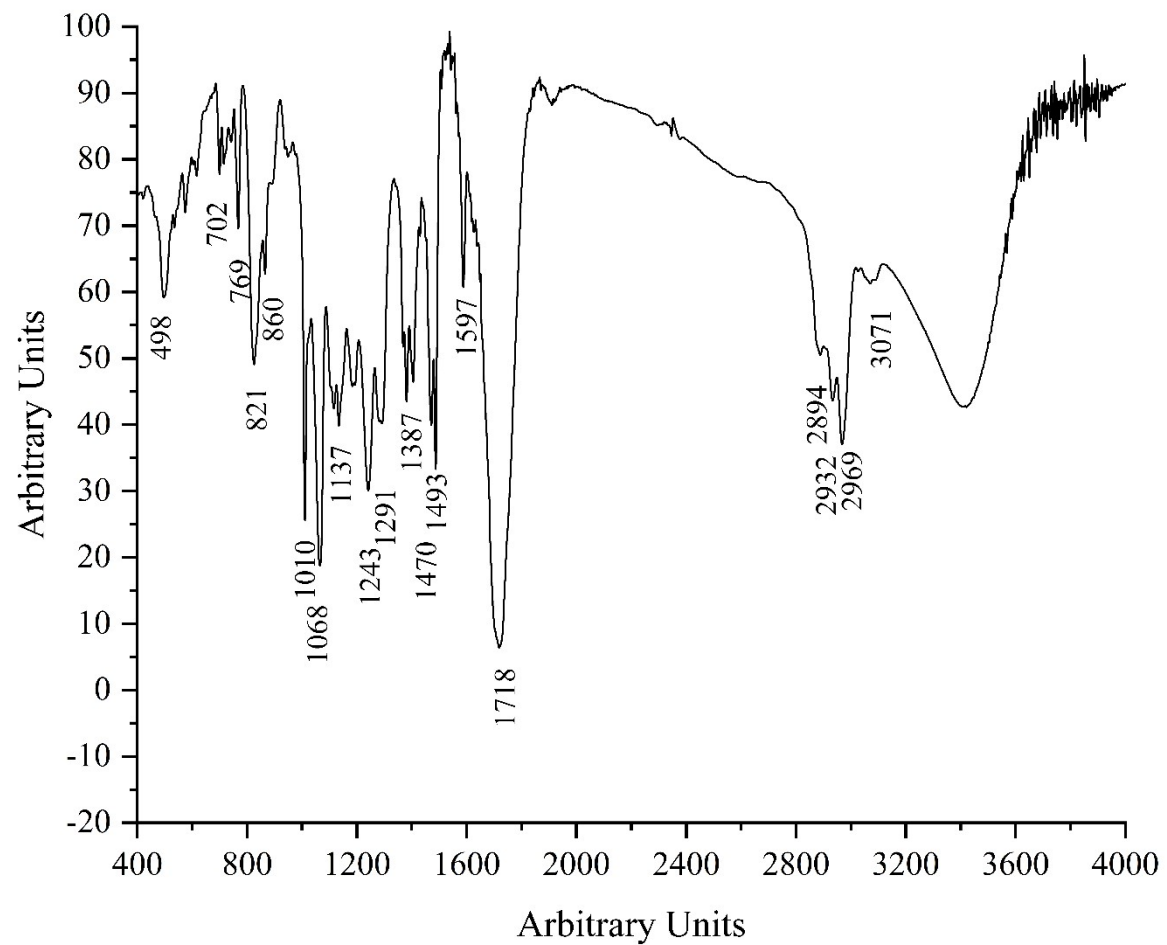

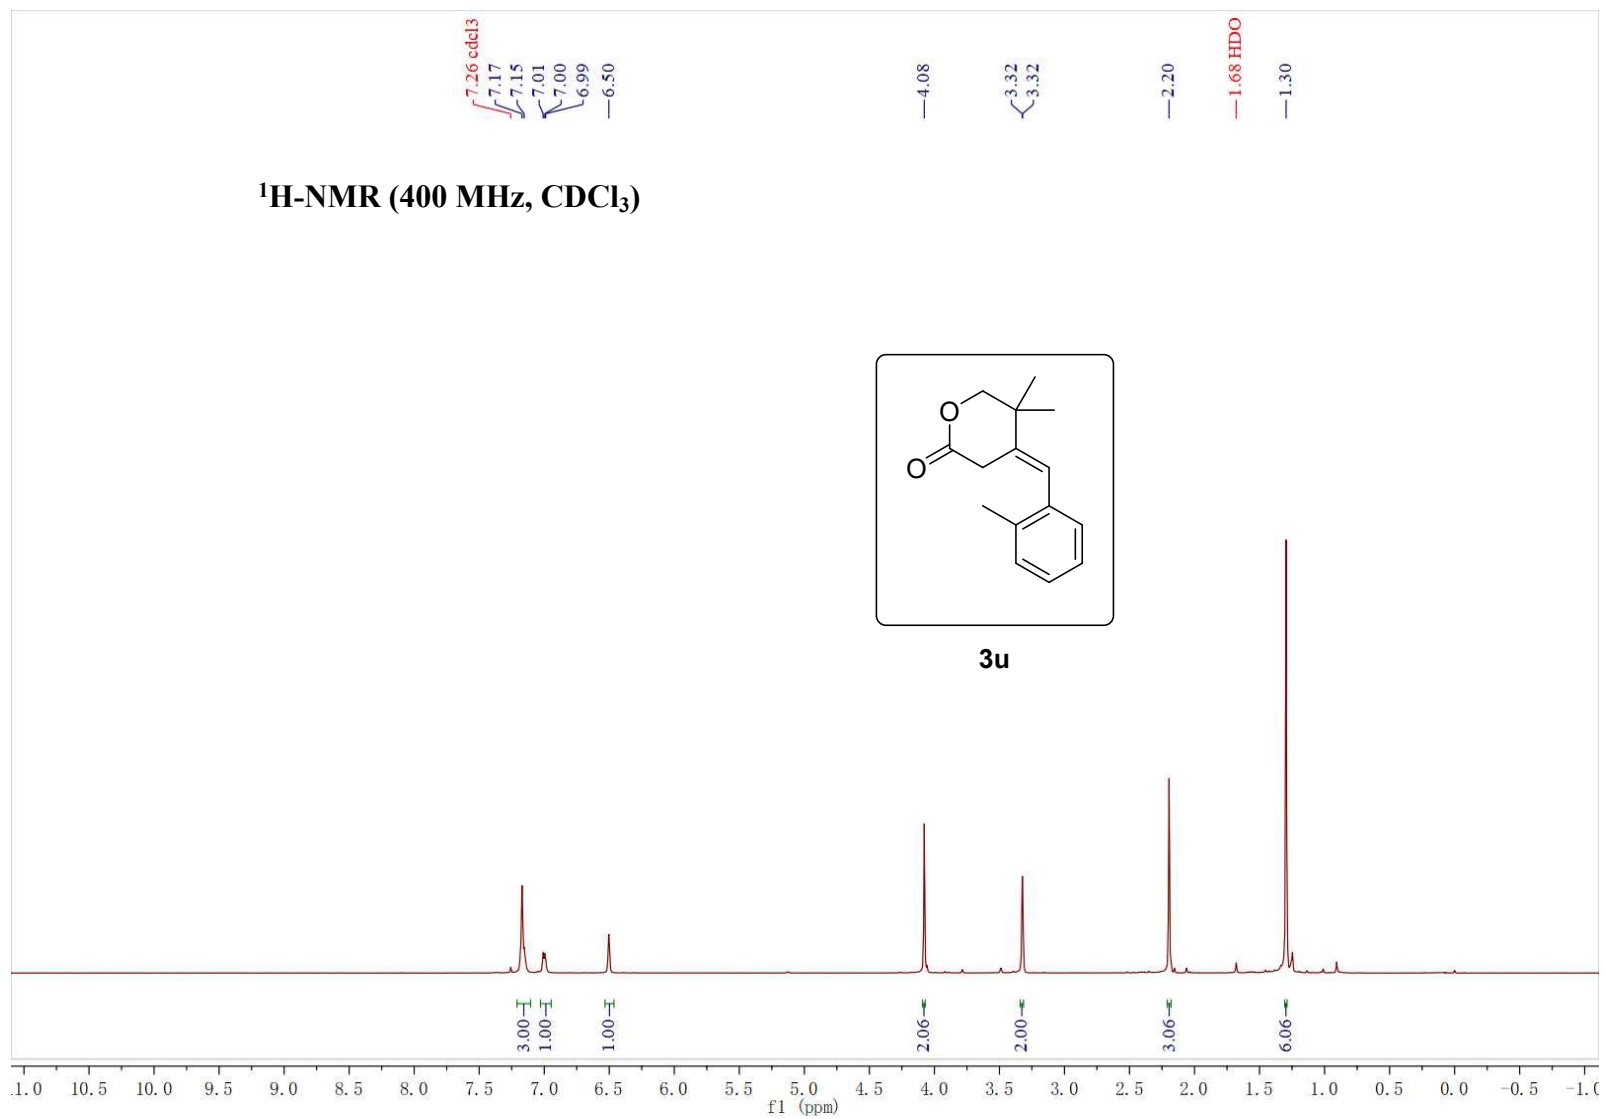

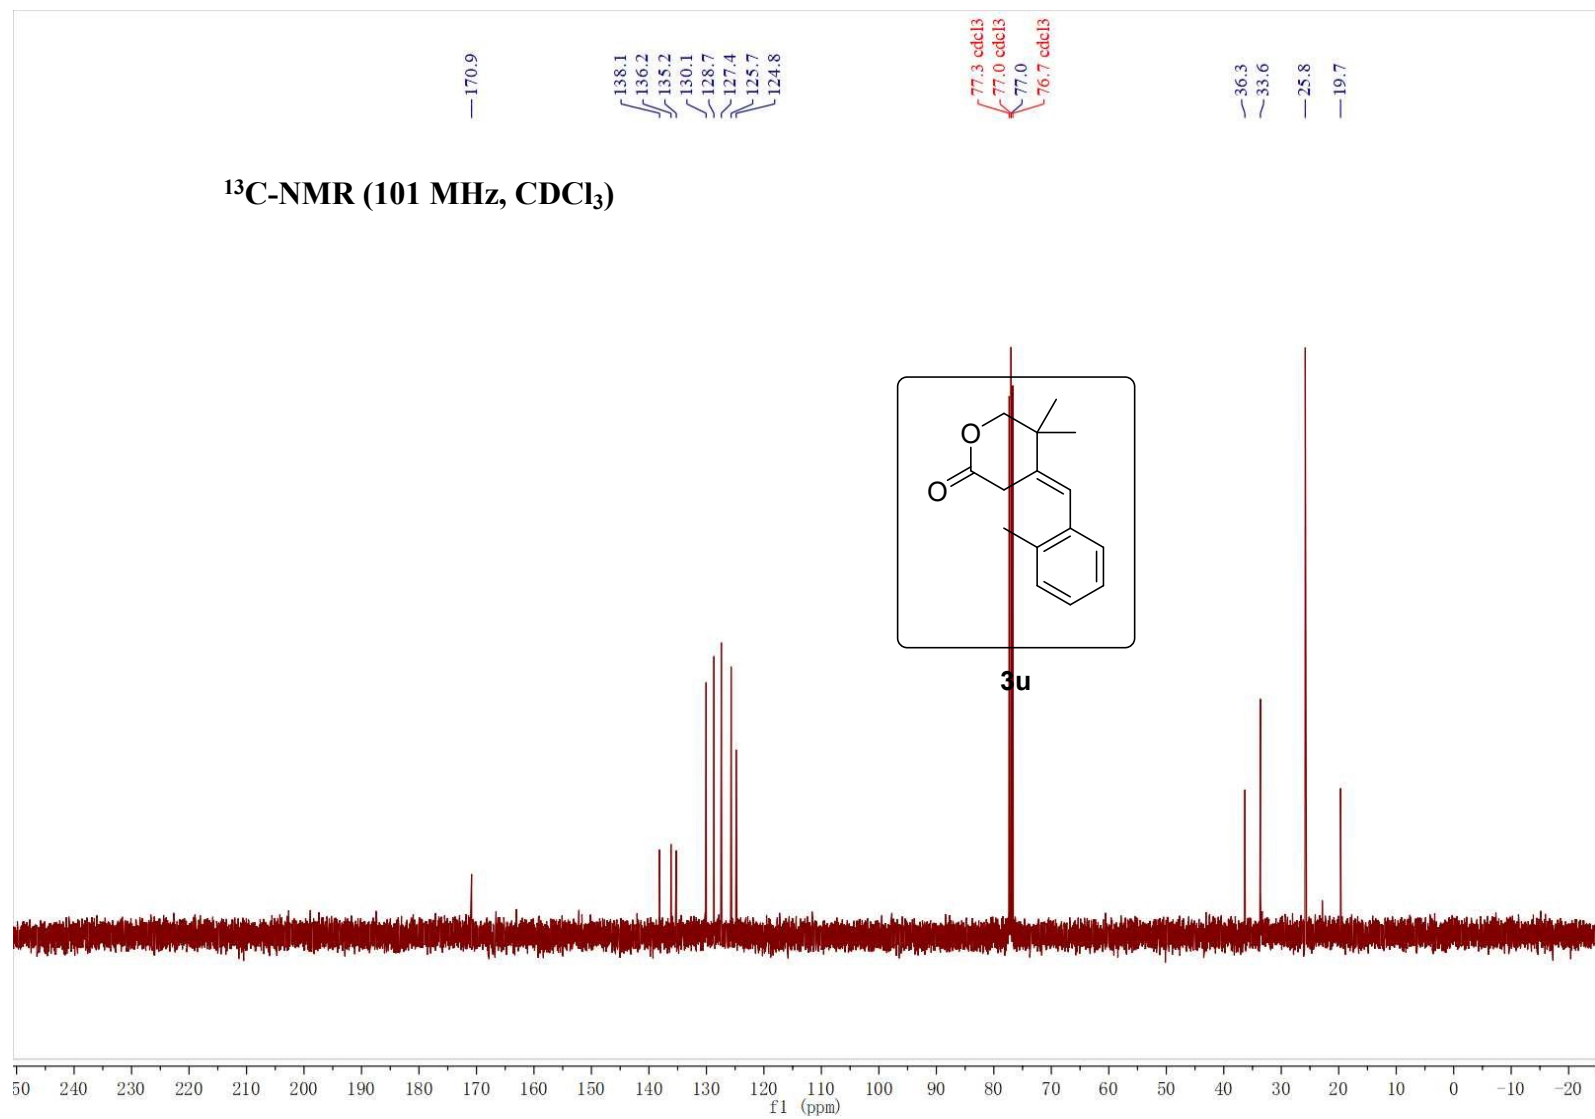

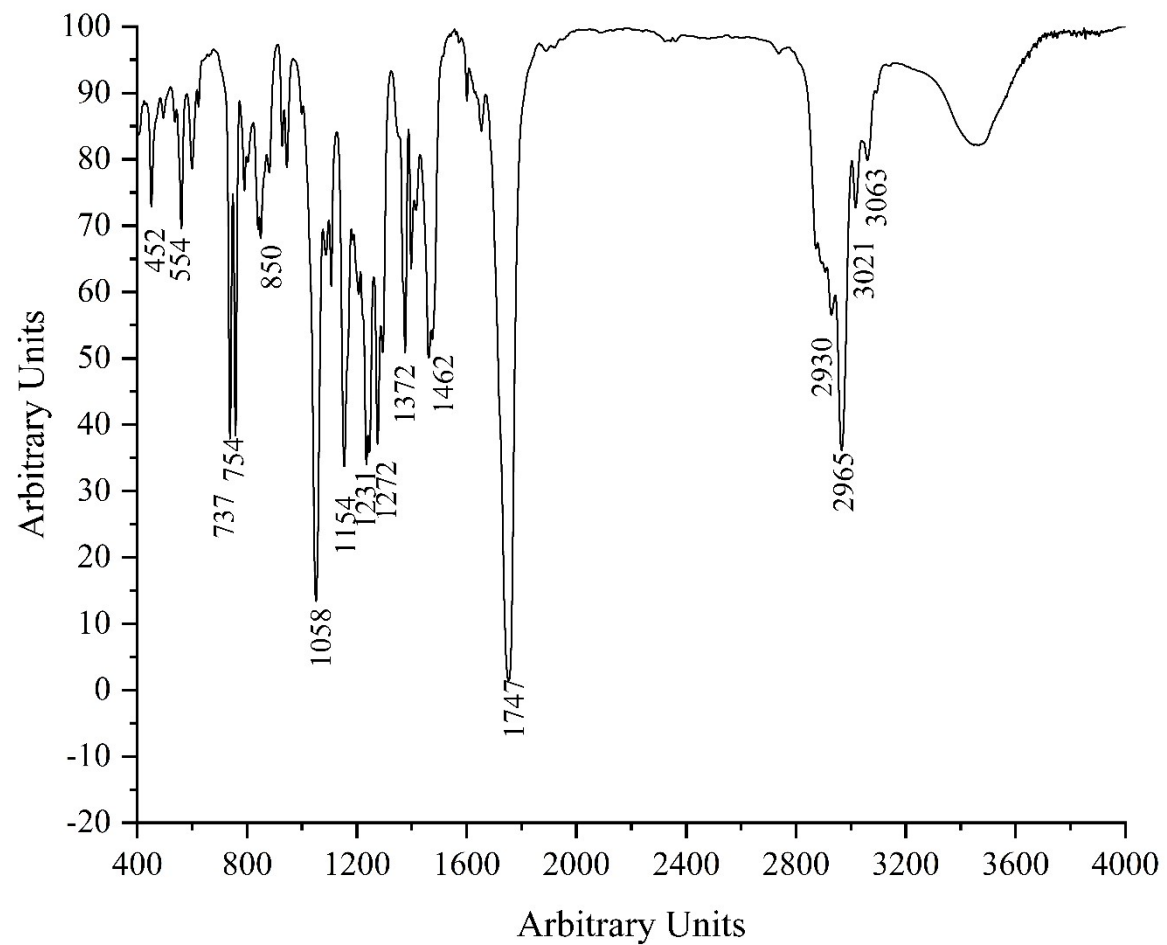

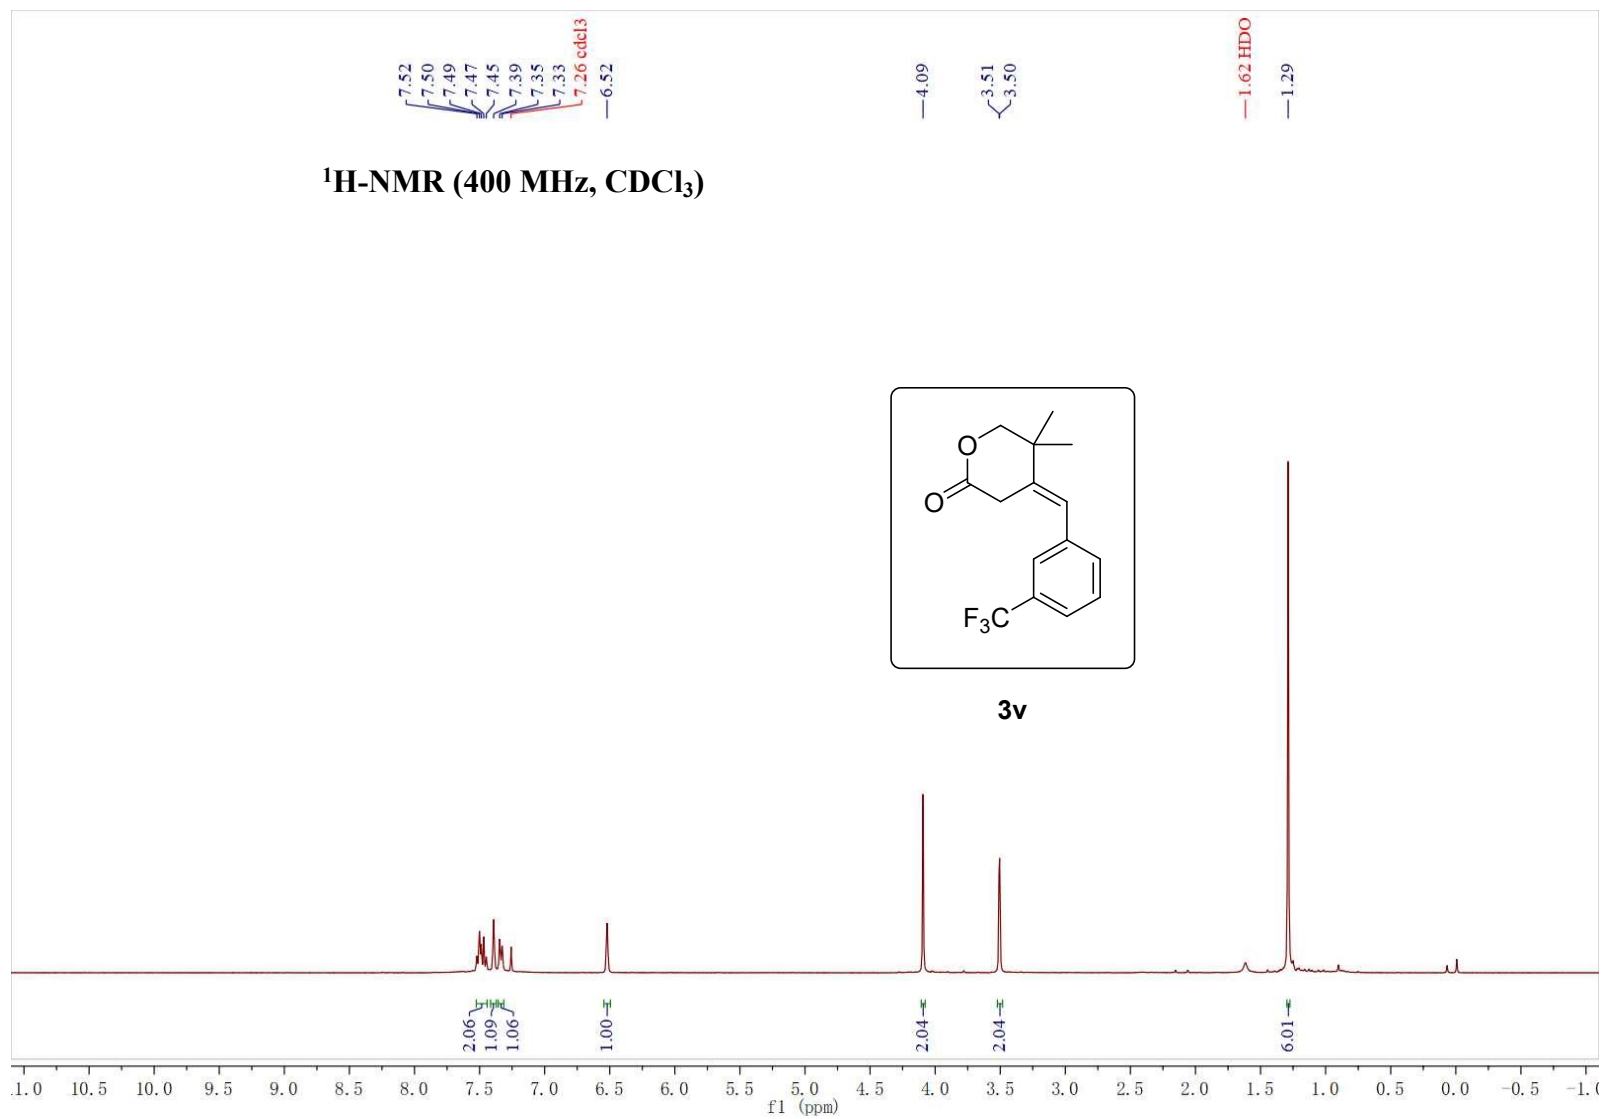

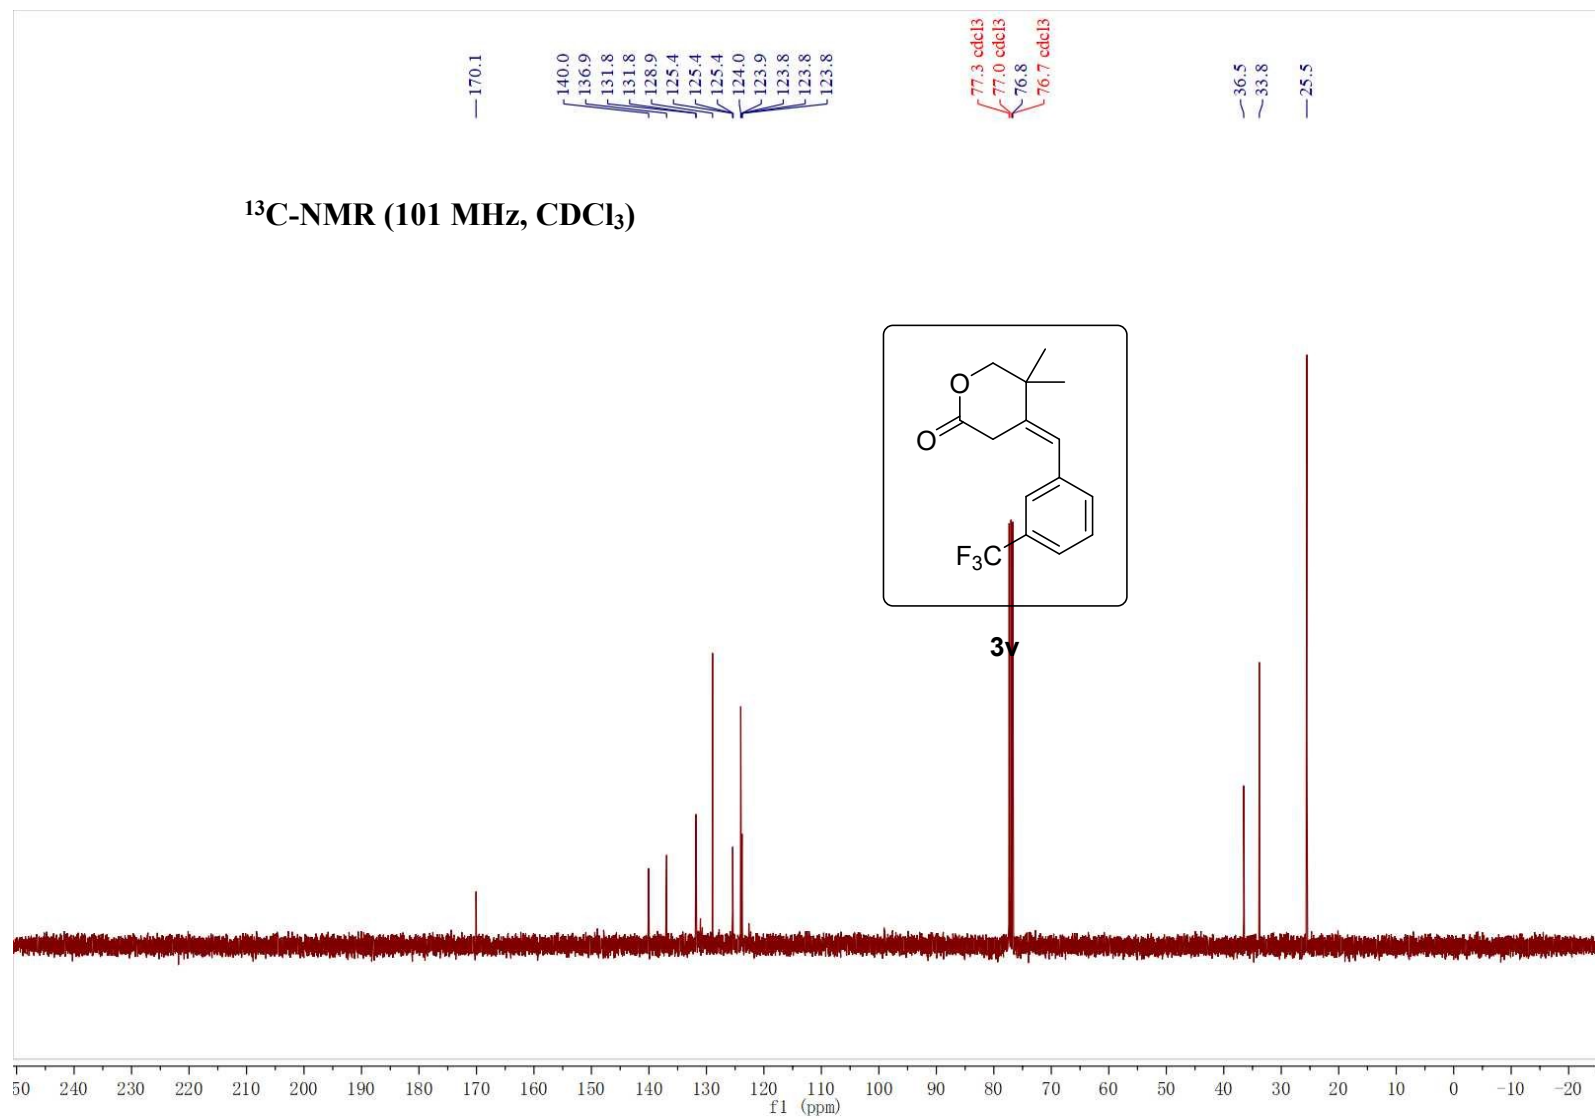



**$^{19}\text{F}$ -NMR (376 MHz,  $\text{CDCl}_3$ )**

—62.74

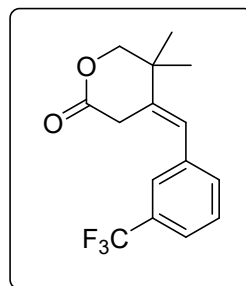

**3v**

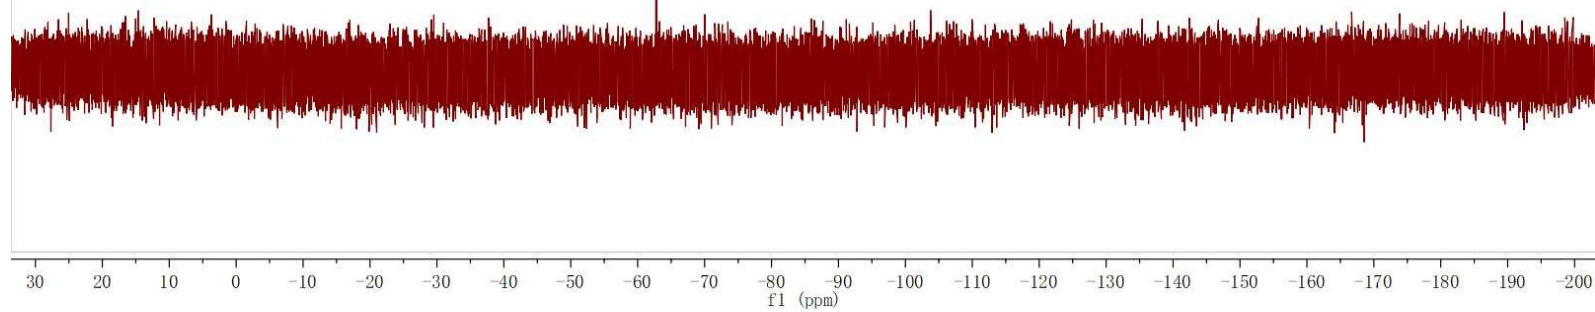

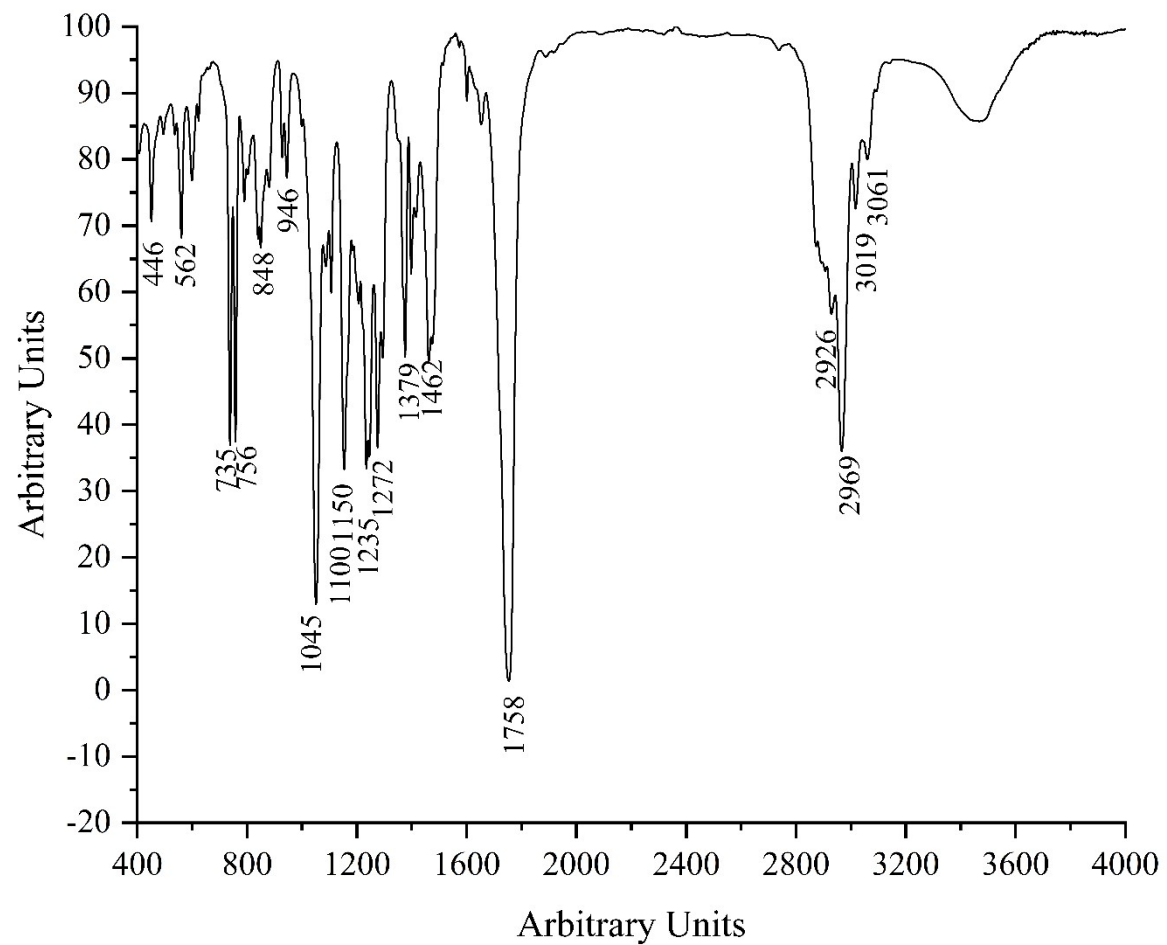

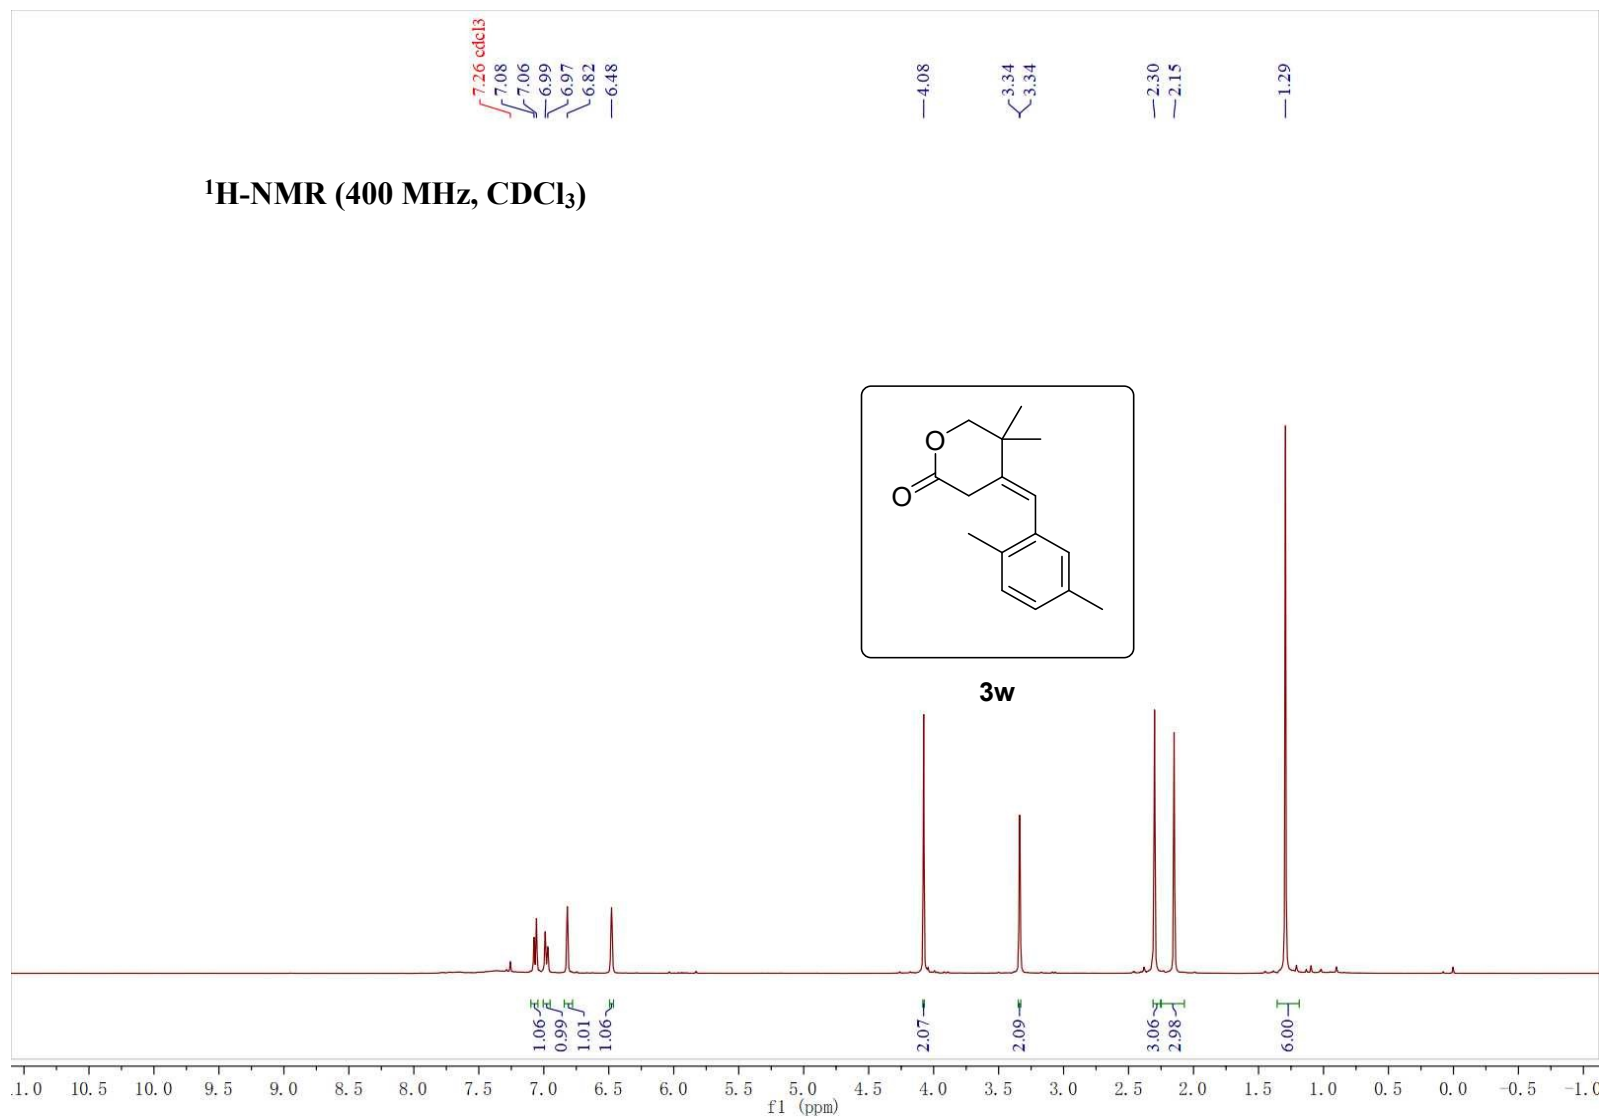

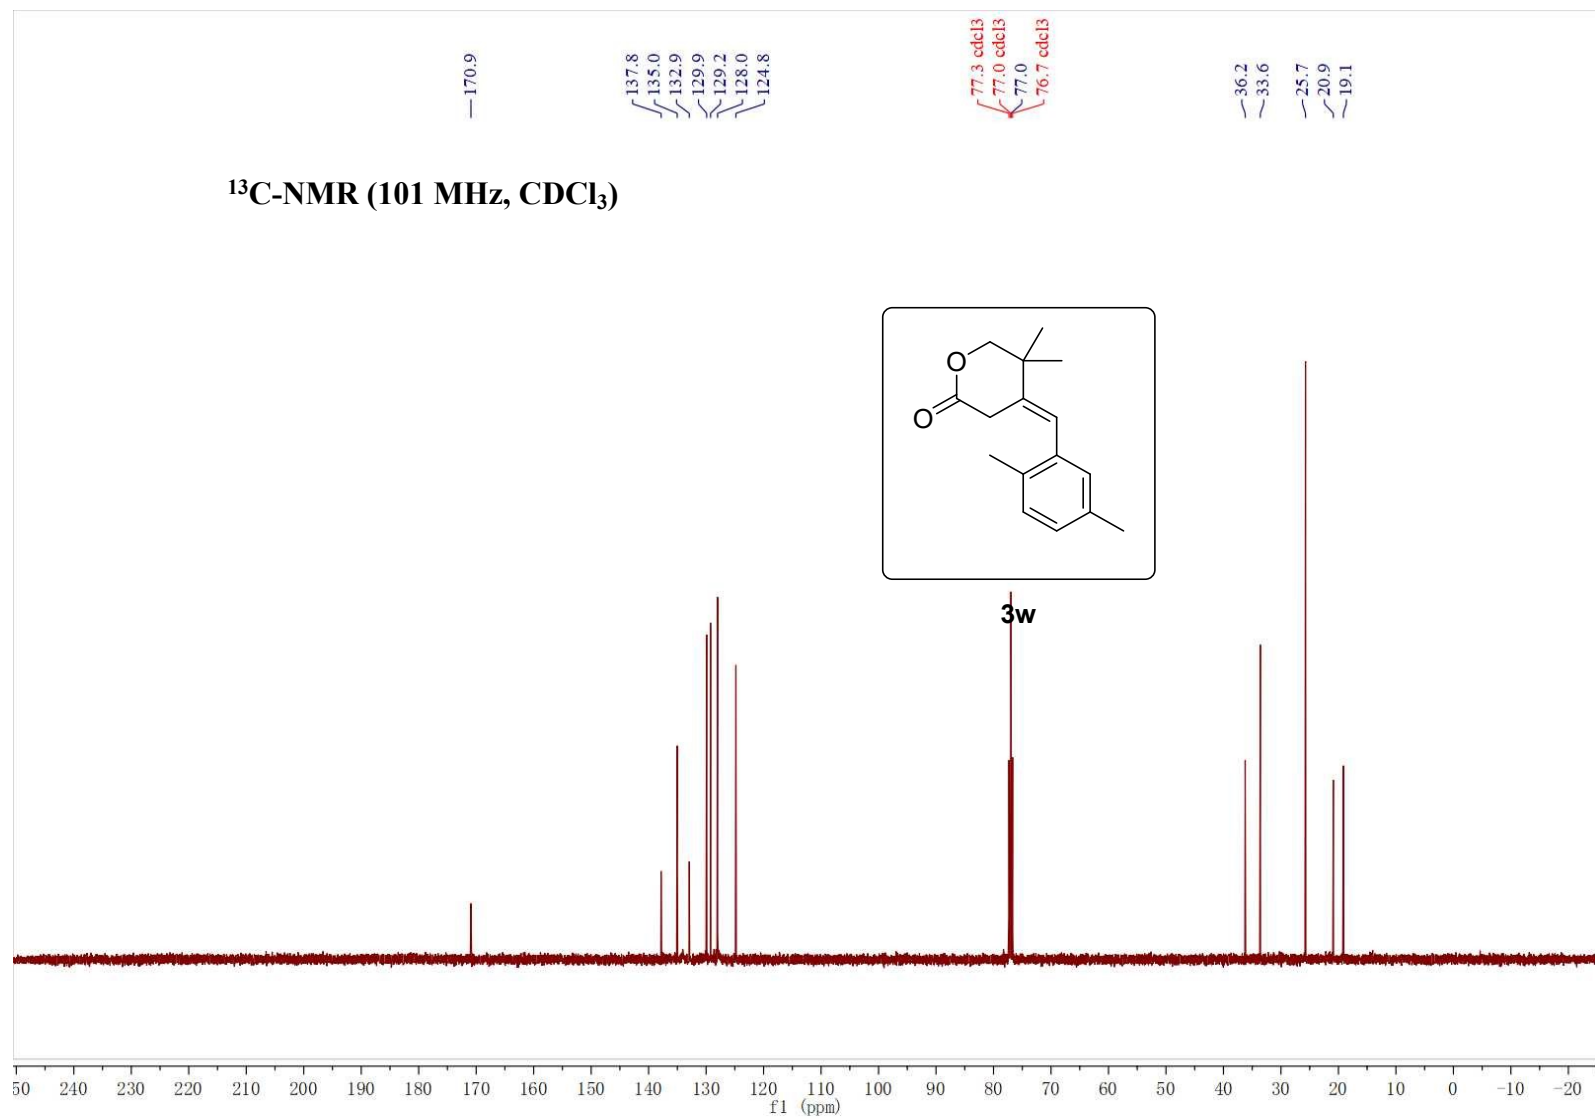

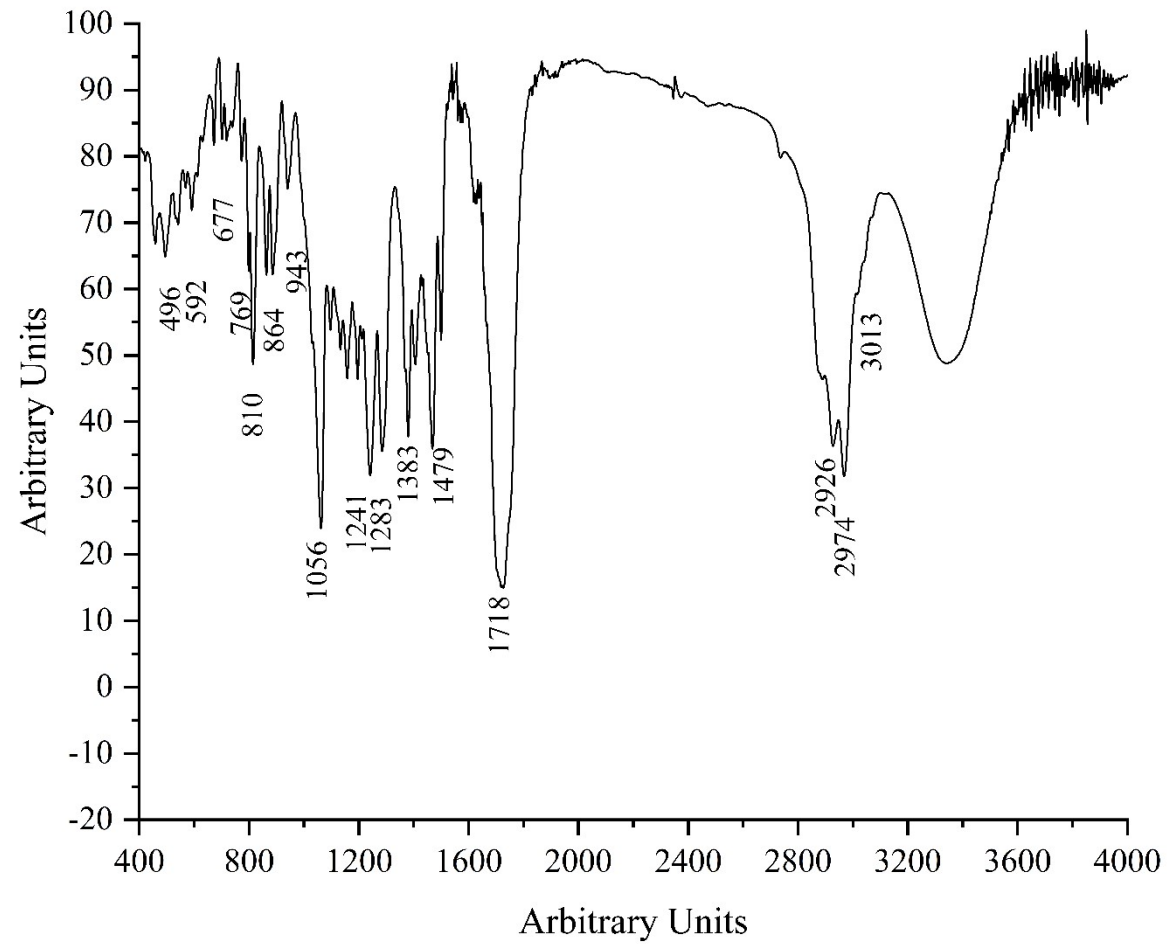

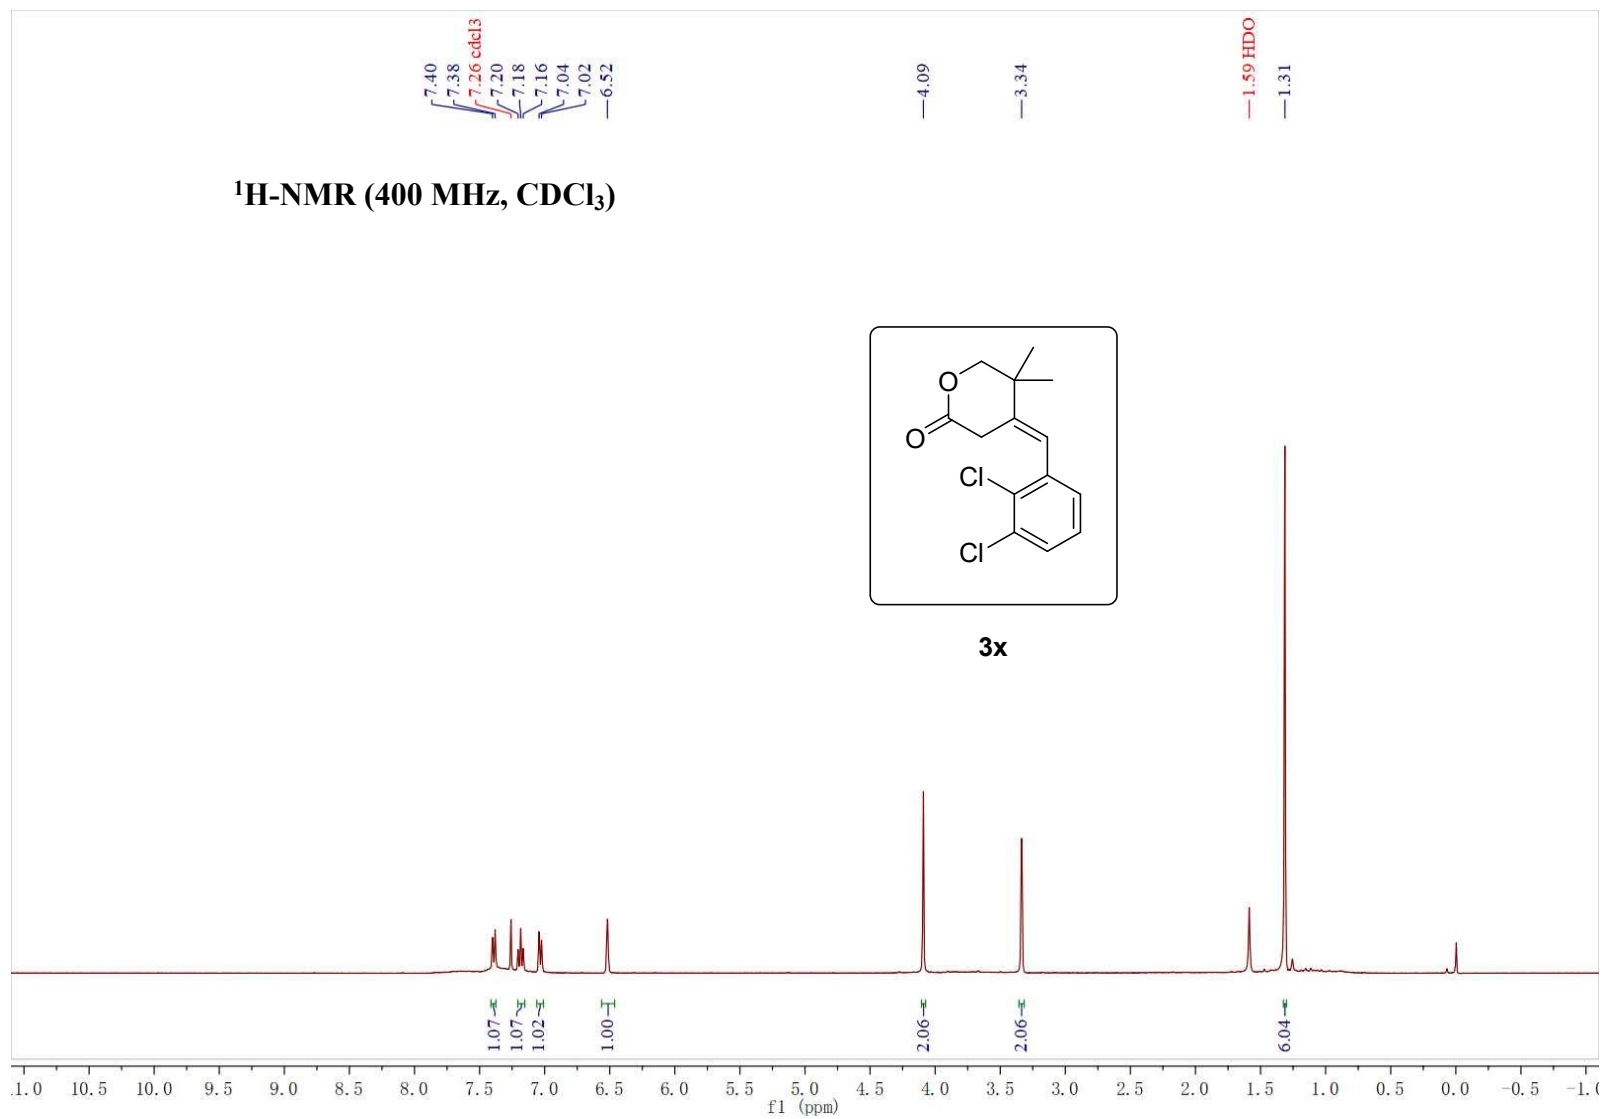

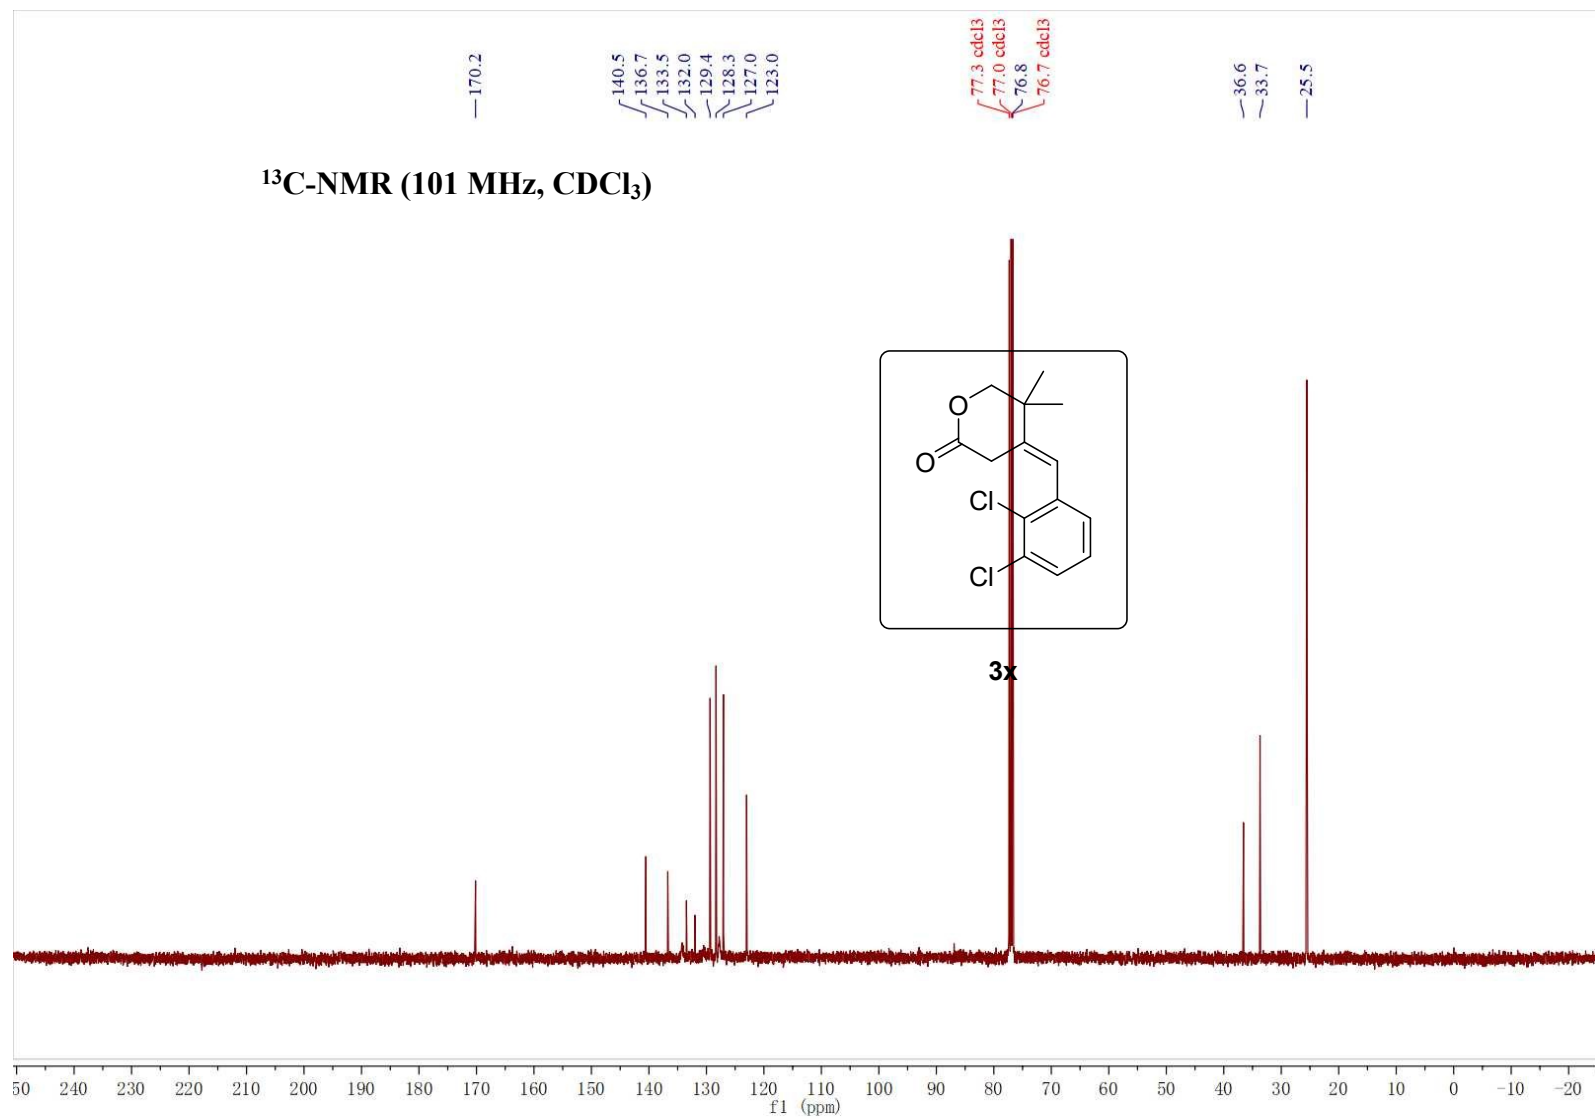

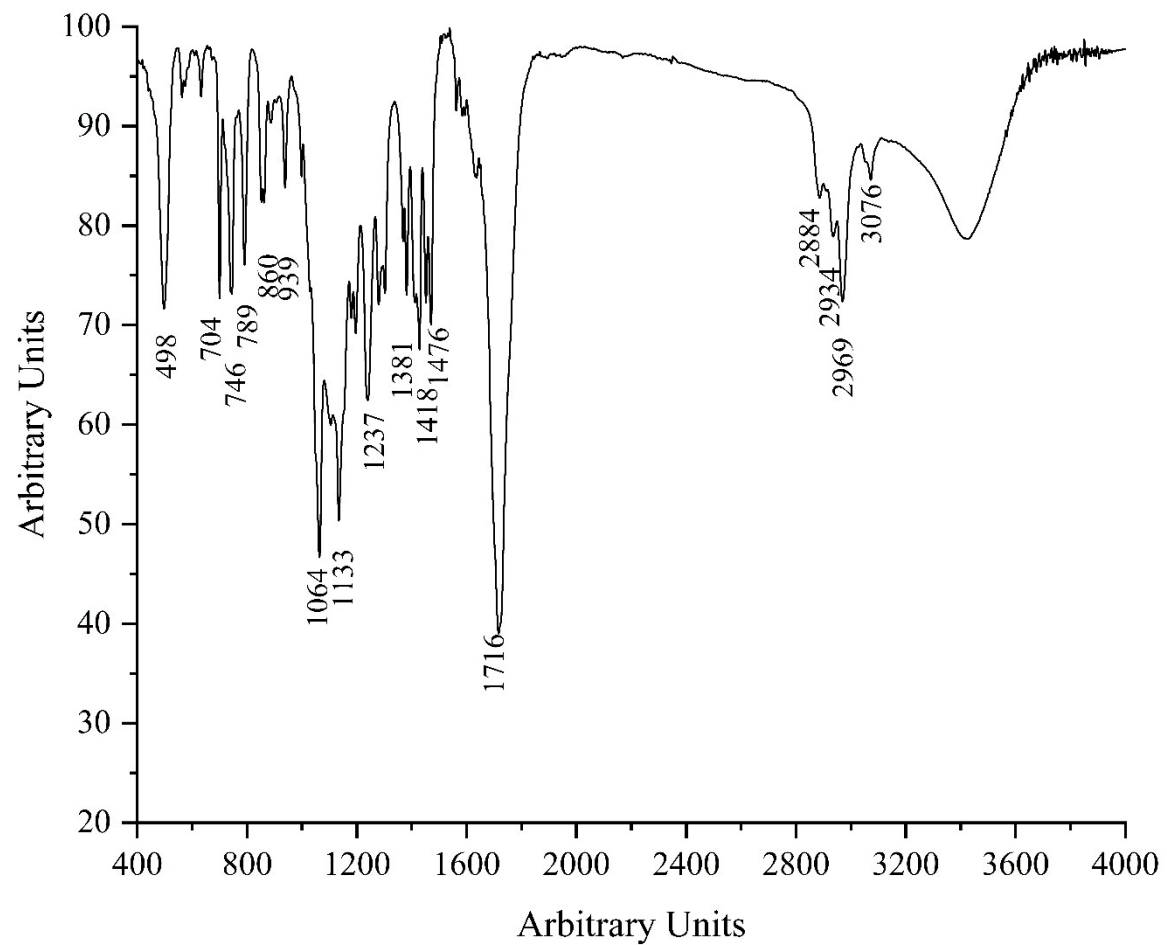



**<sup>1</sup>H-NMR (400 MHz, CDCl<sub>3</sub>)**

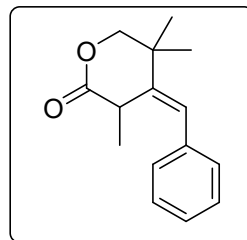

**3y**

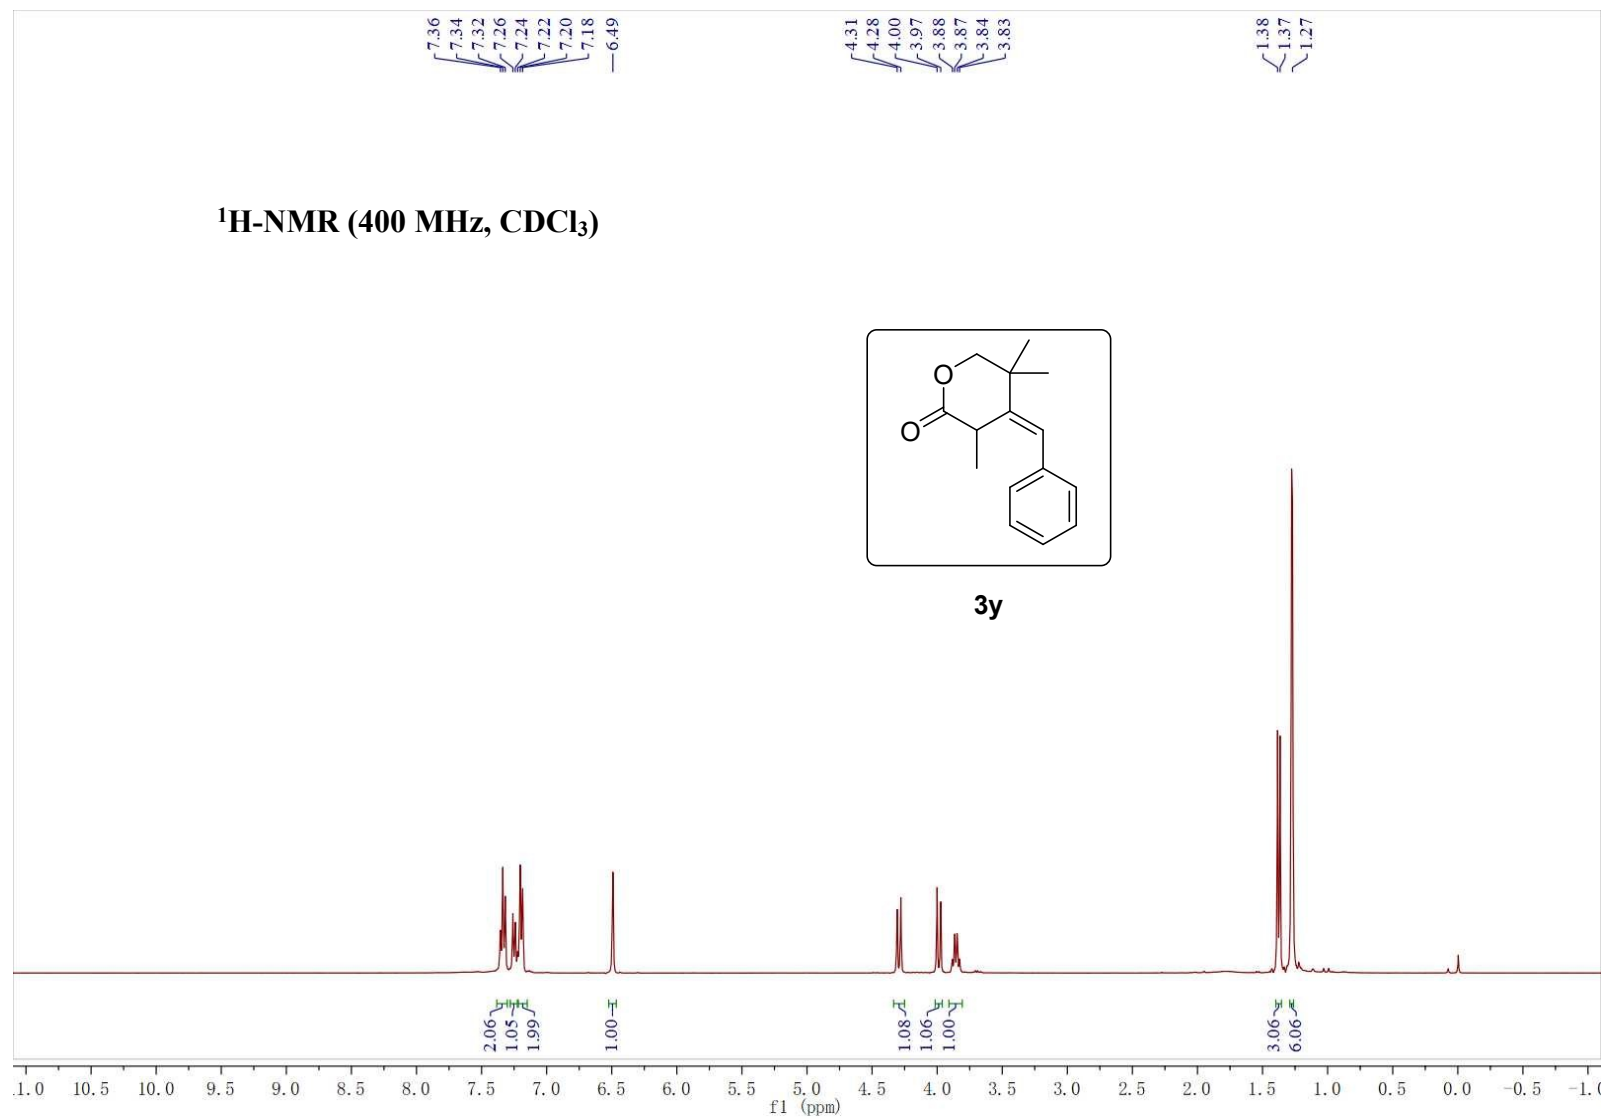

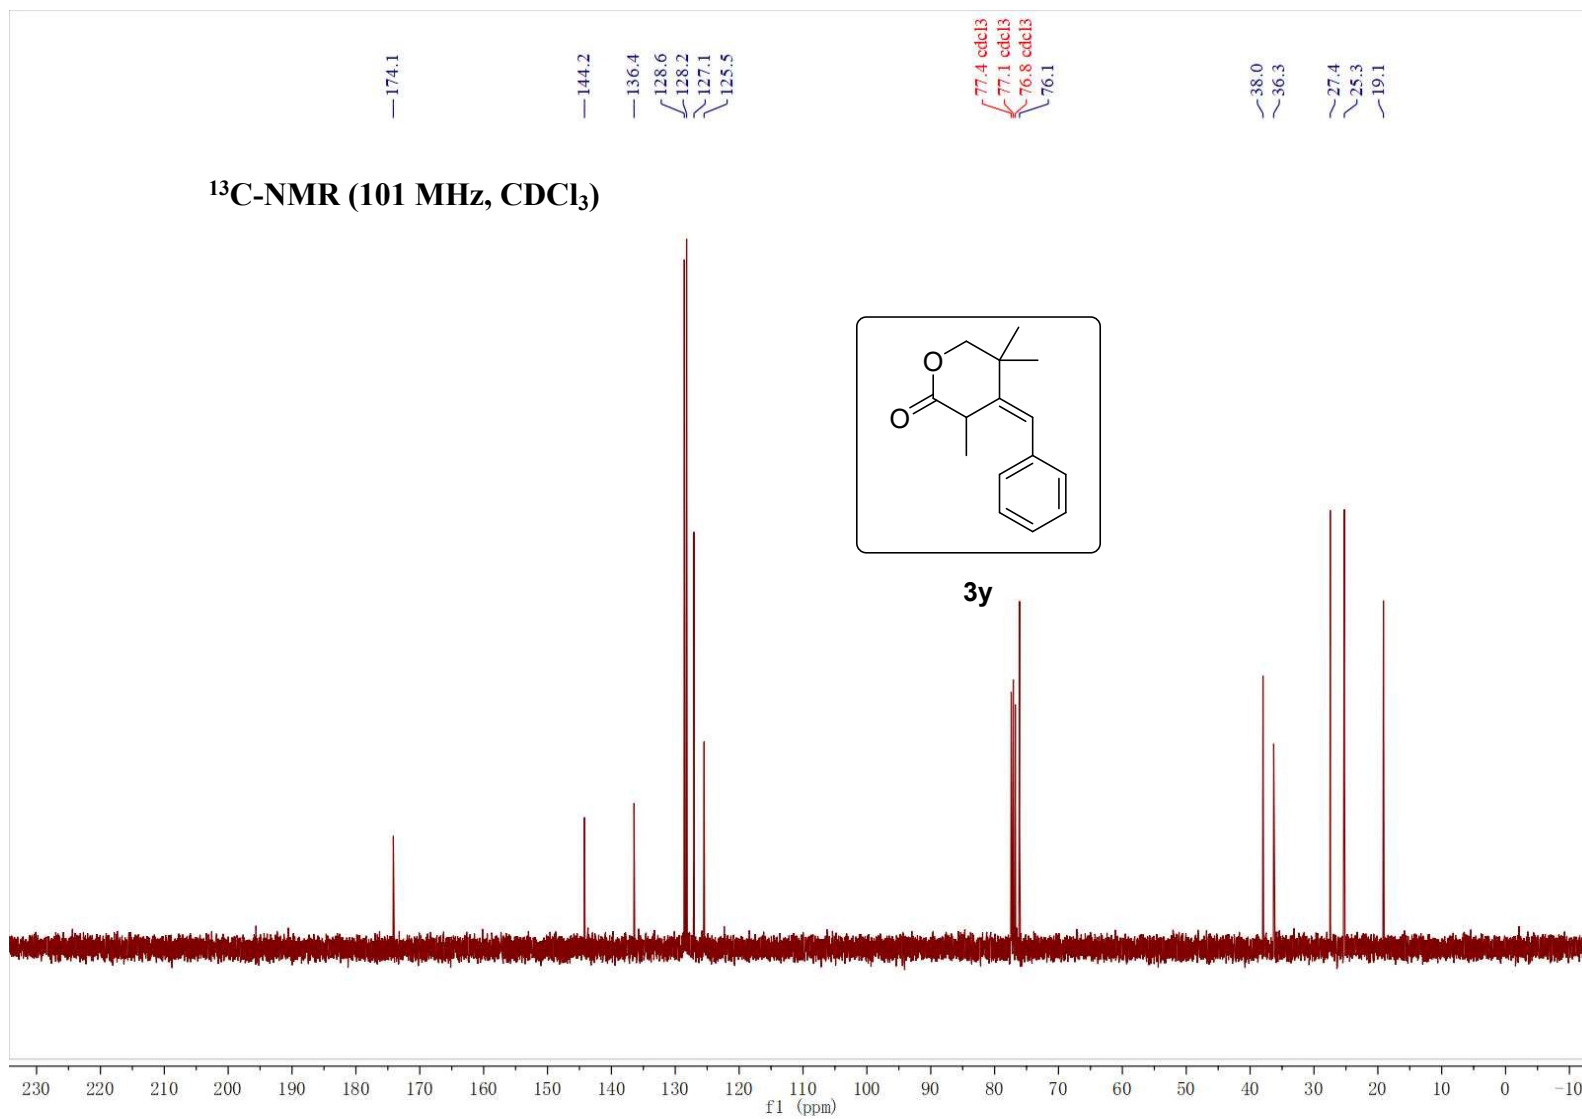

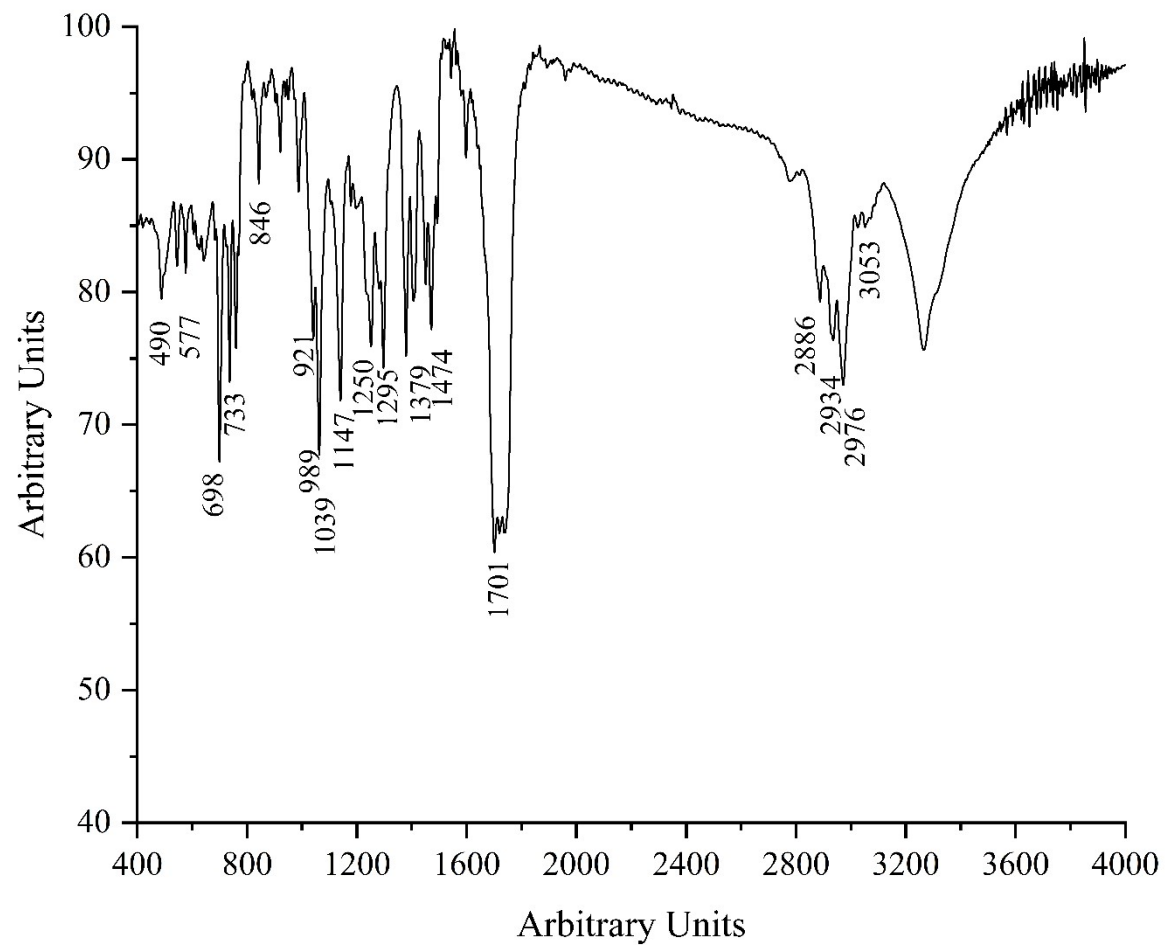

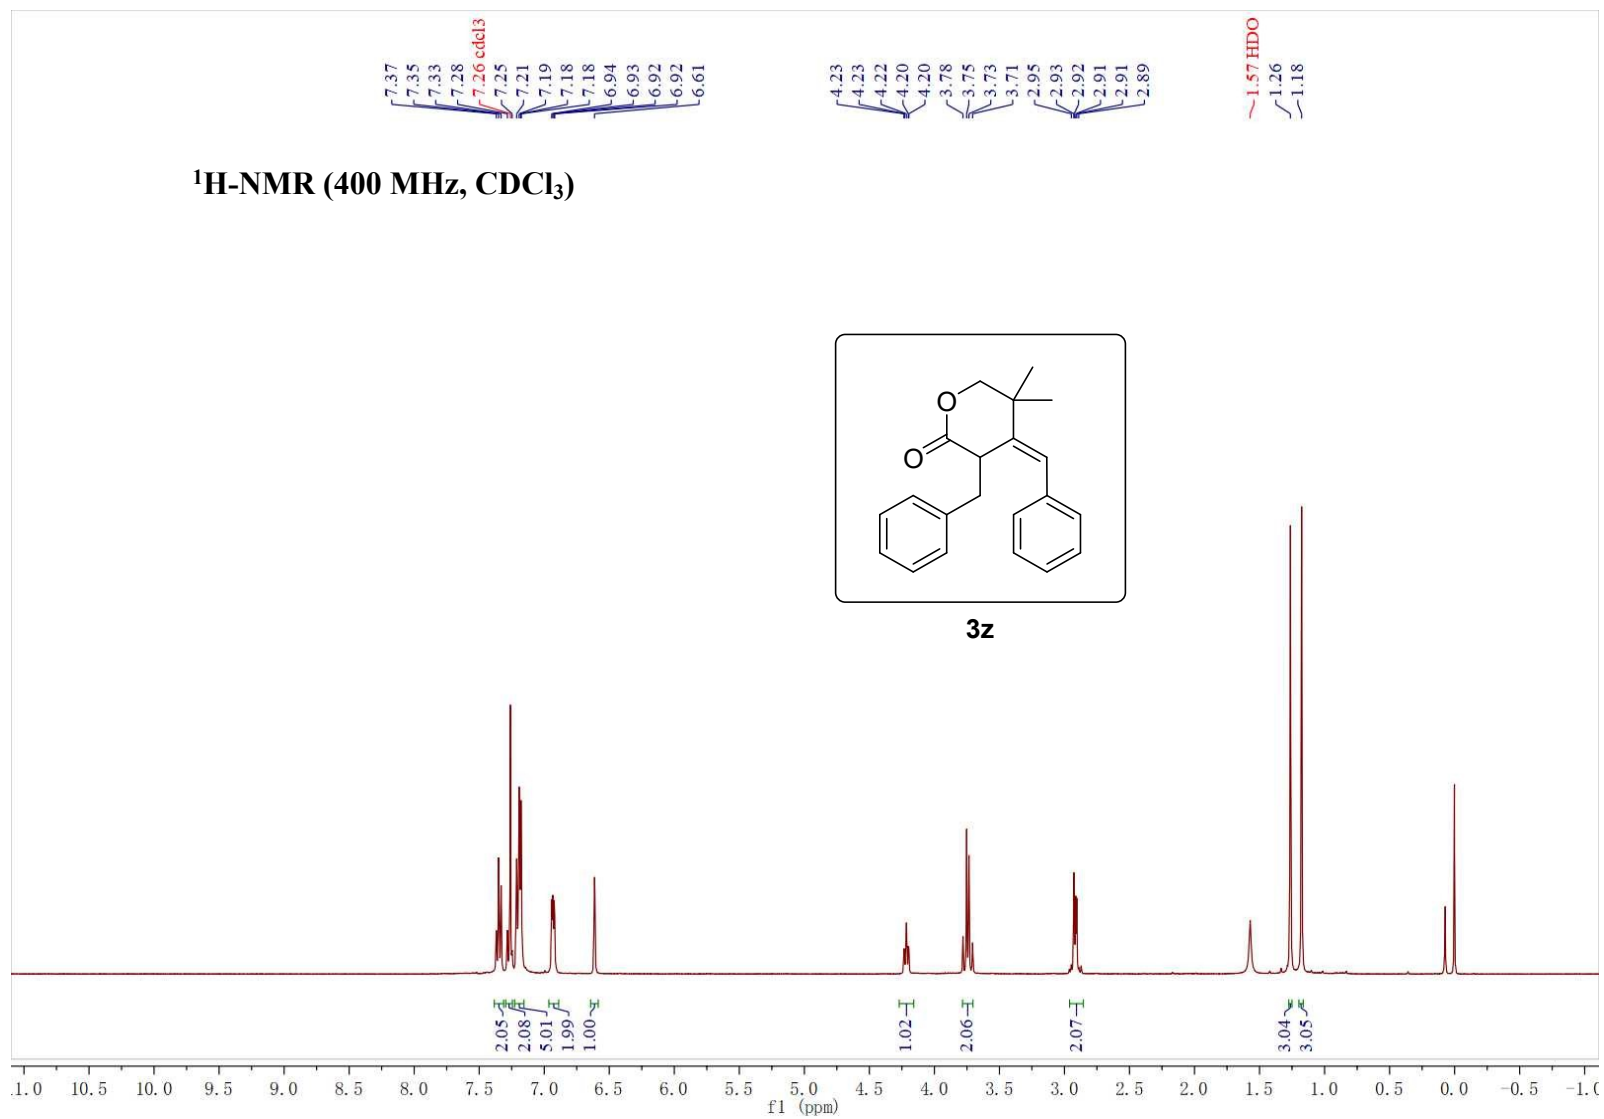

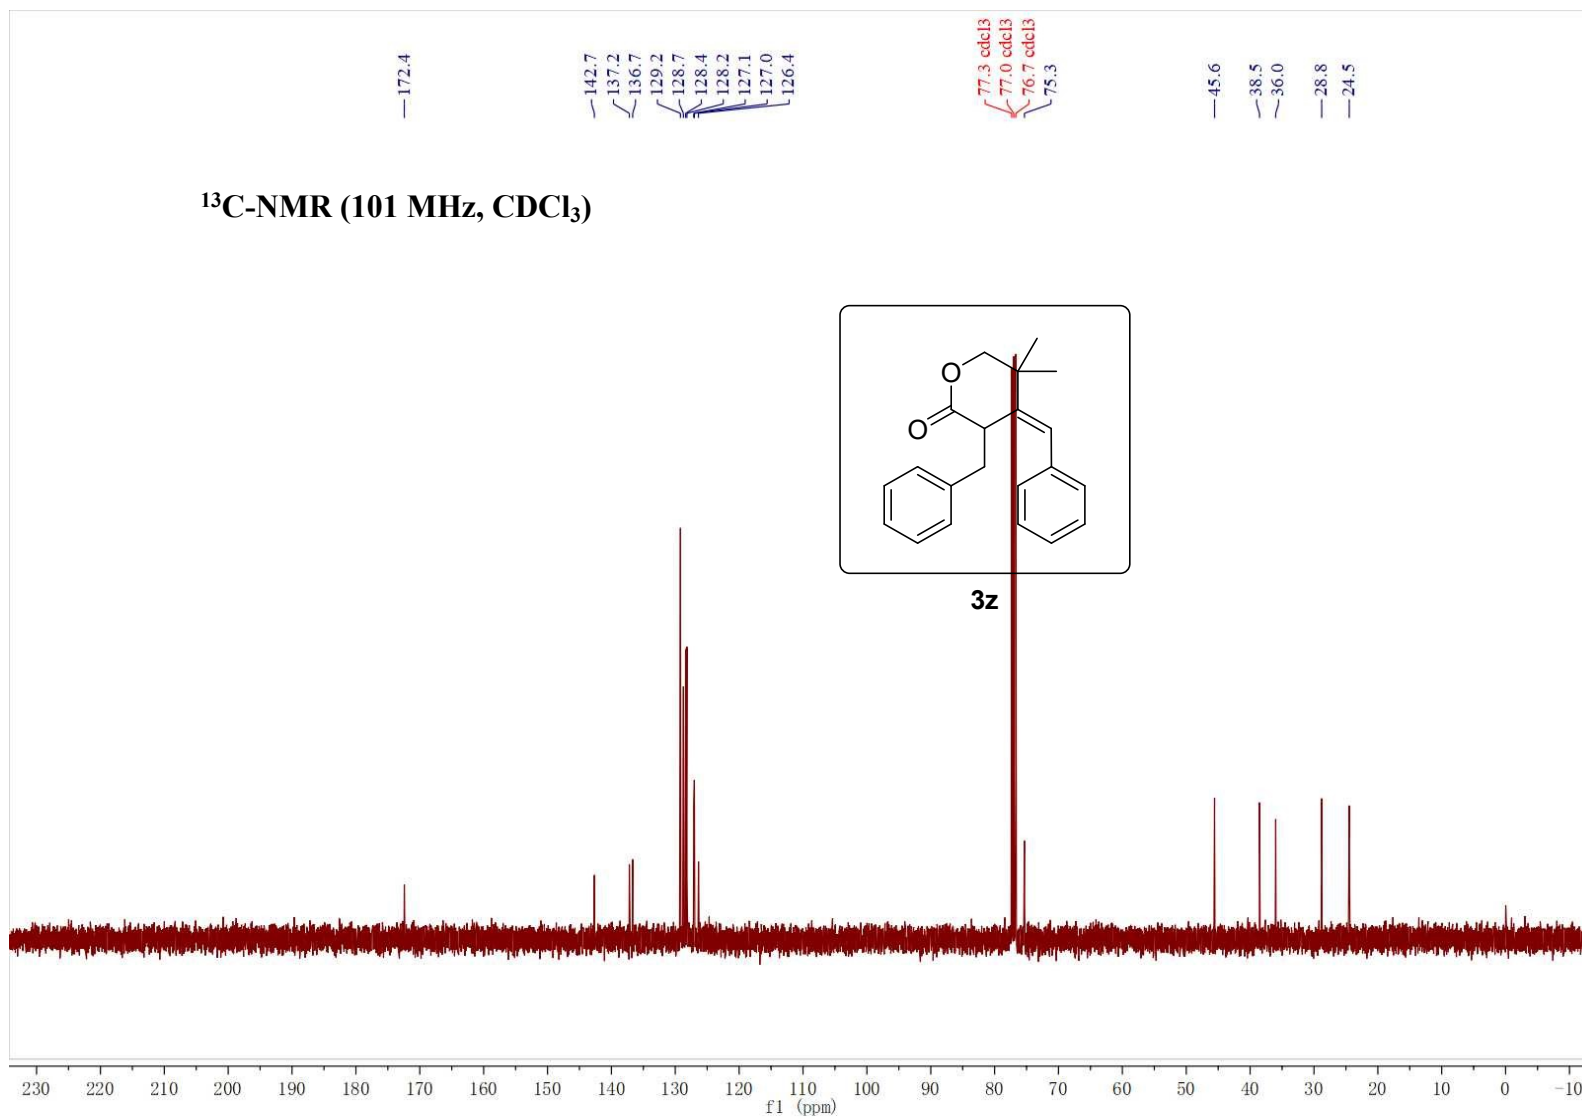

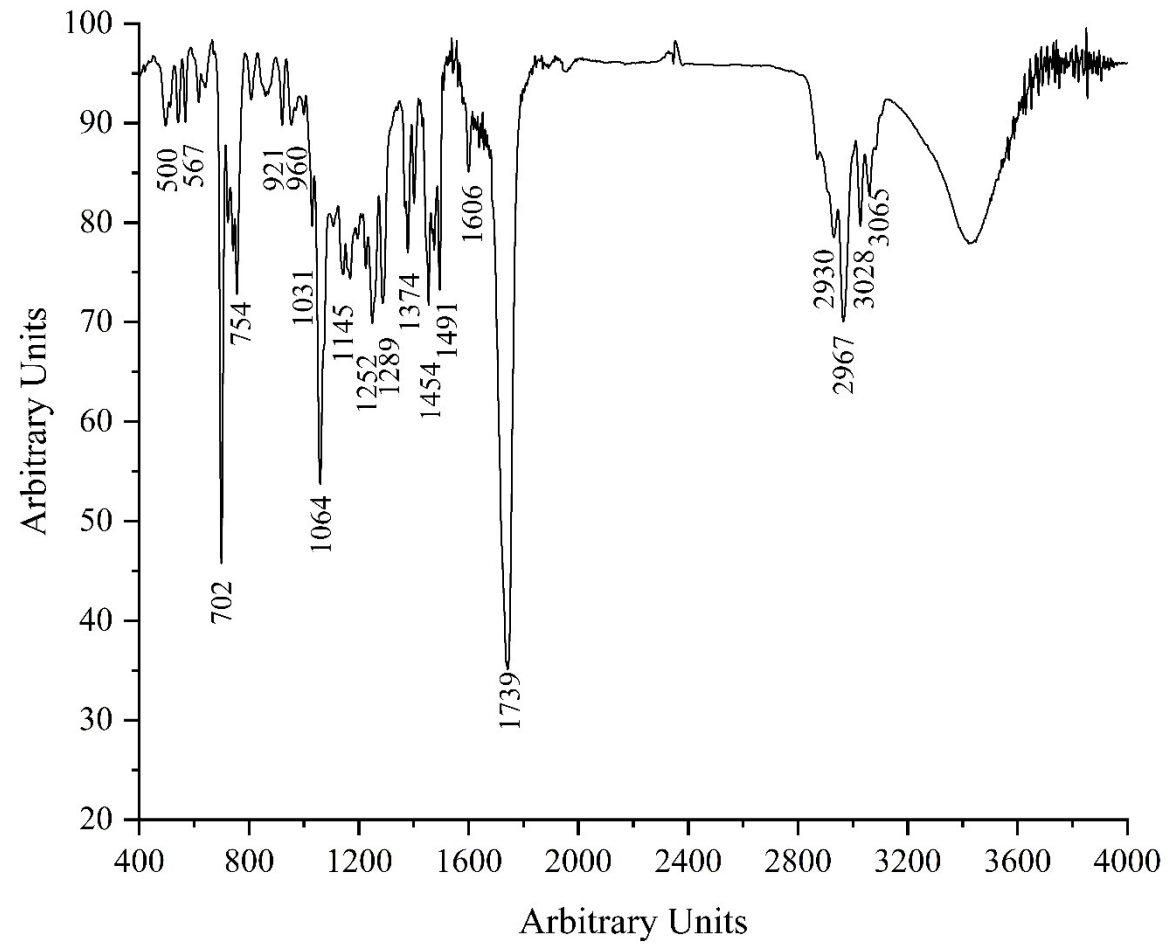

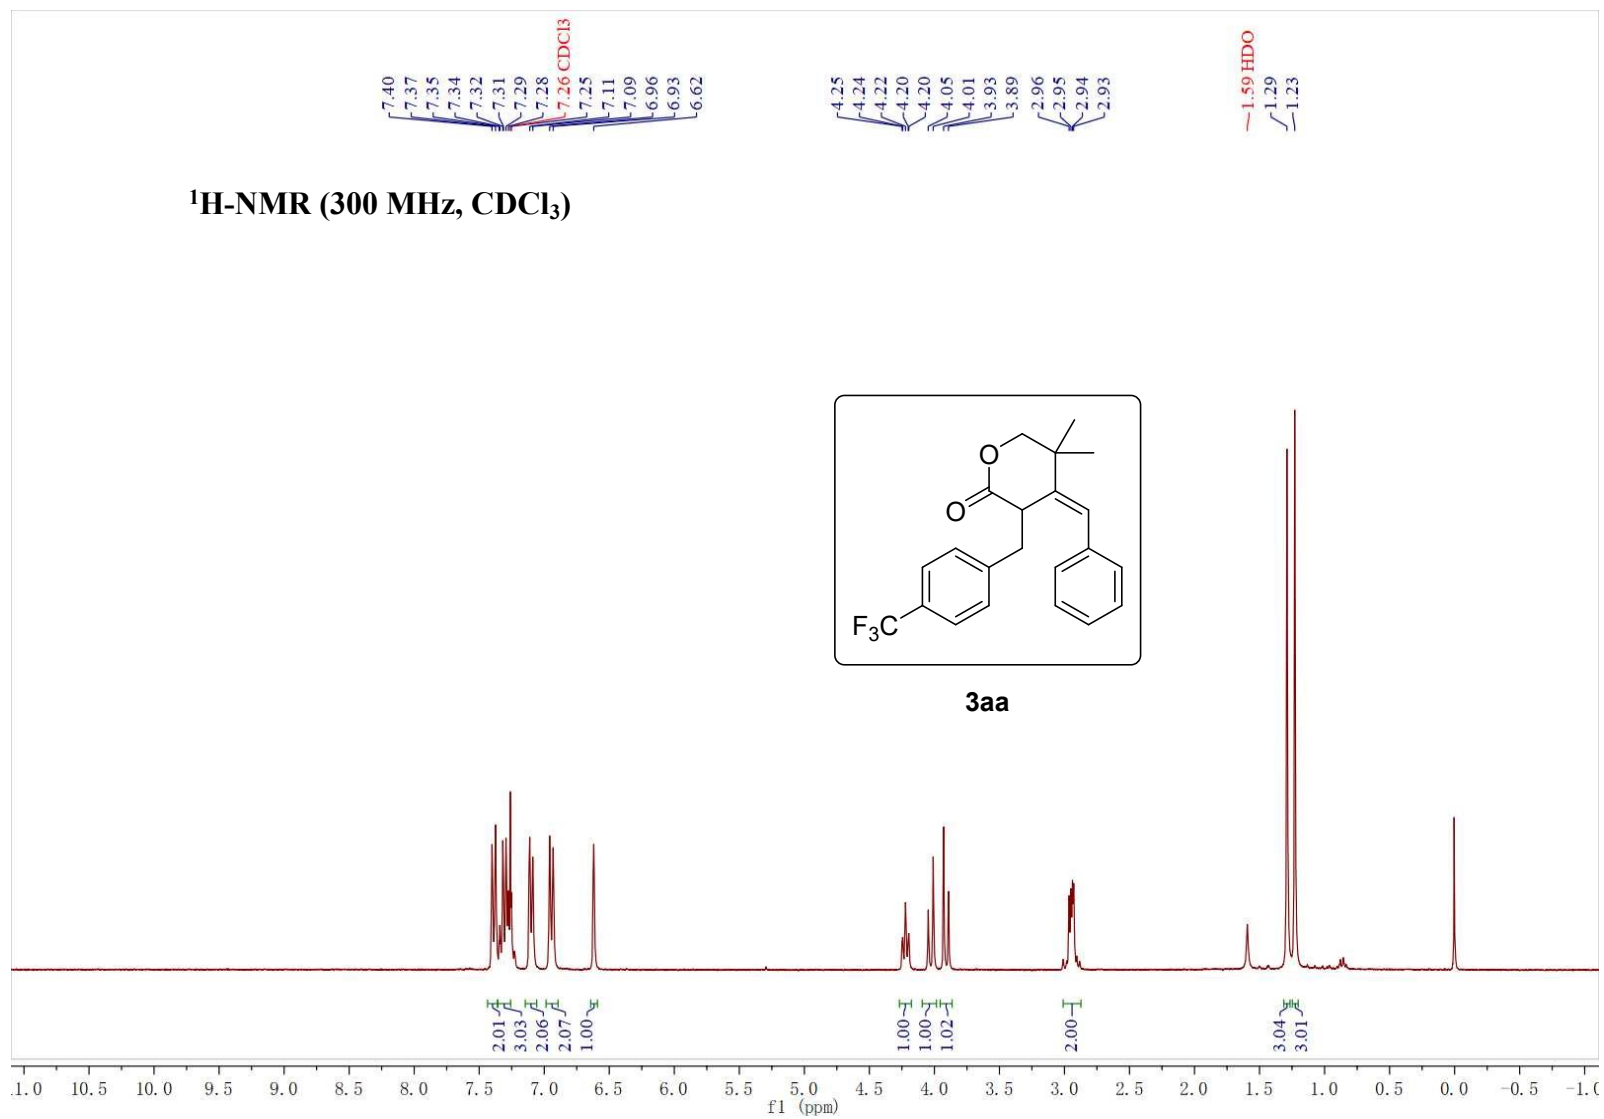

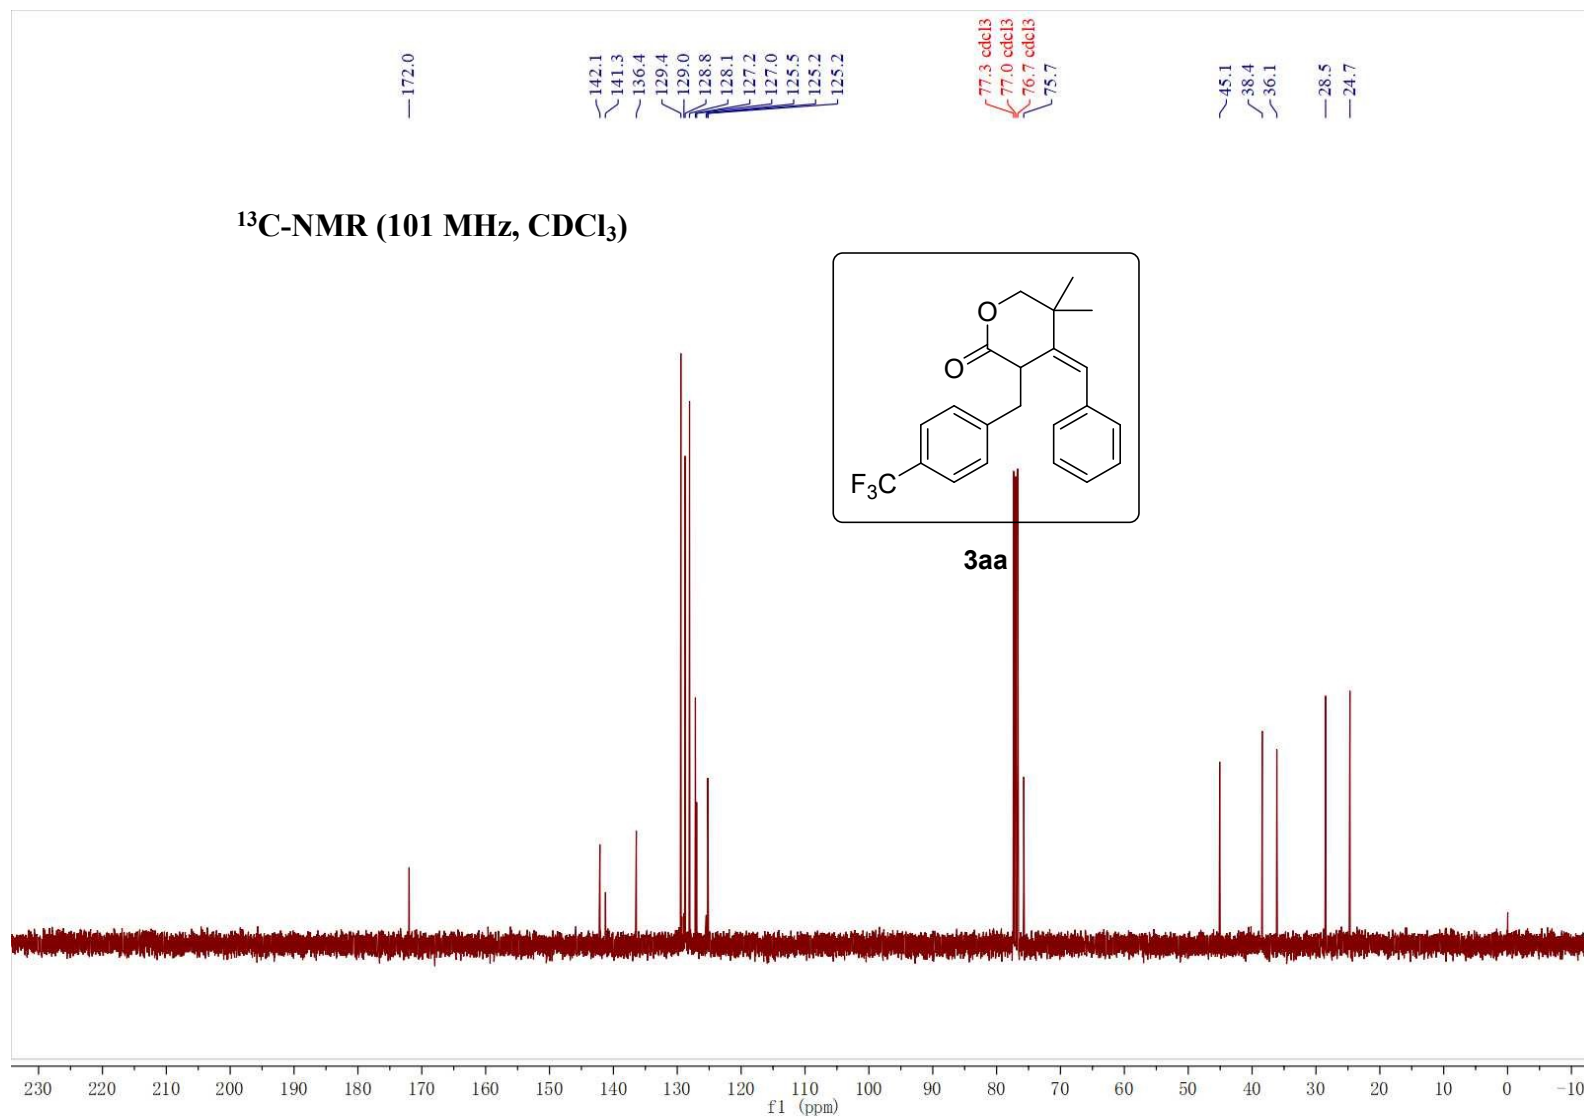



**$^{19}\text{F}$ -NMR (376 MHz,  $\text{CDCl}_3$ )**

—62.53

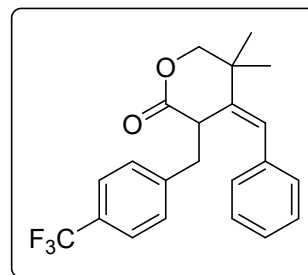

**3aa**

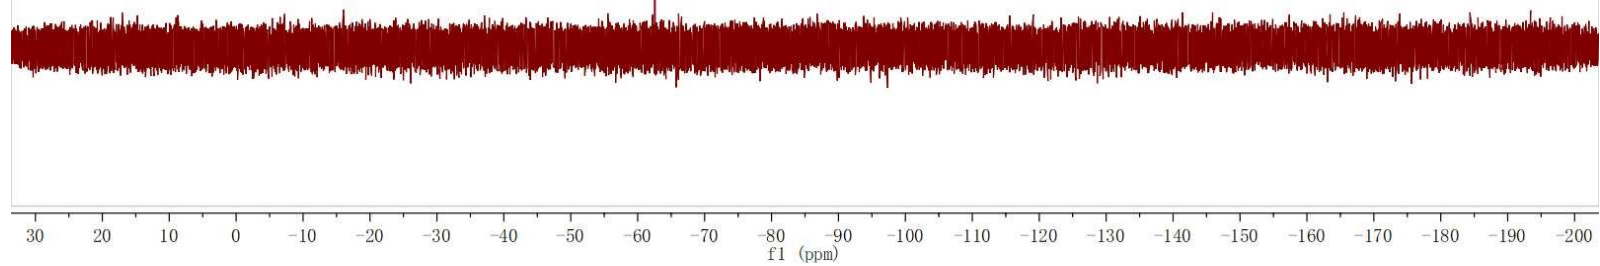

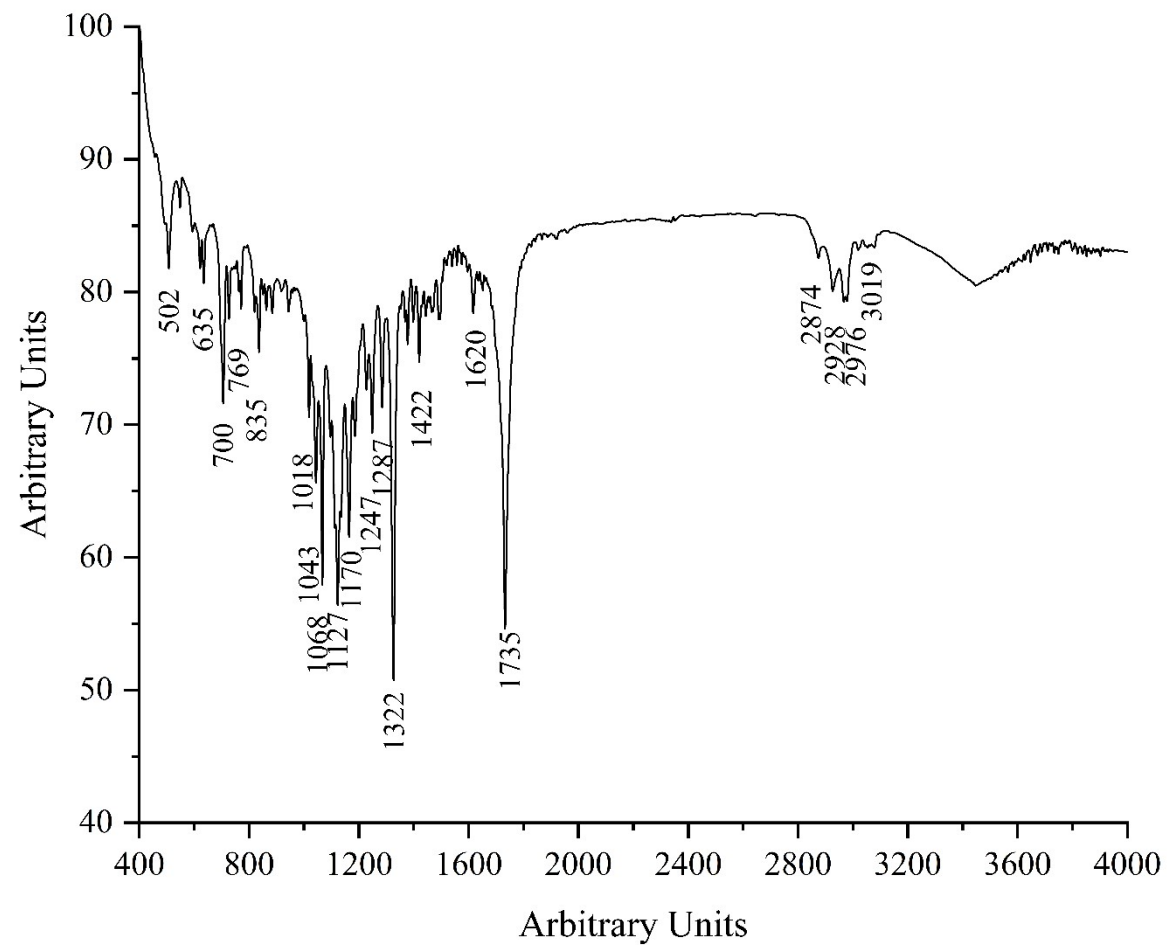

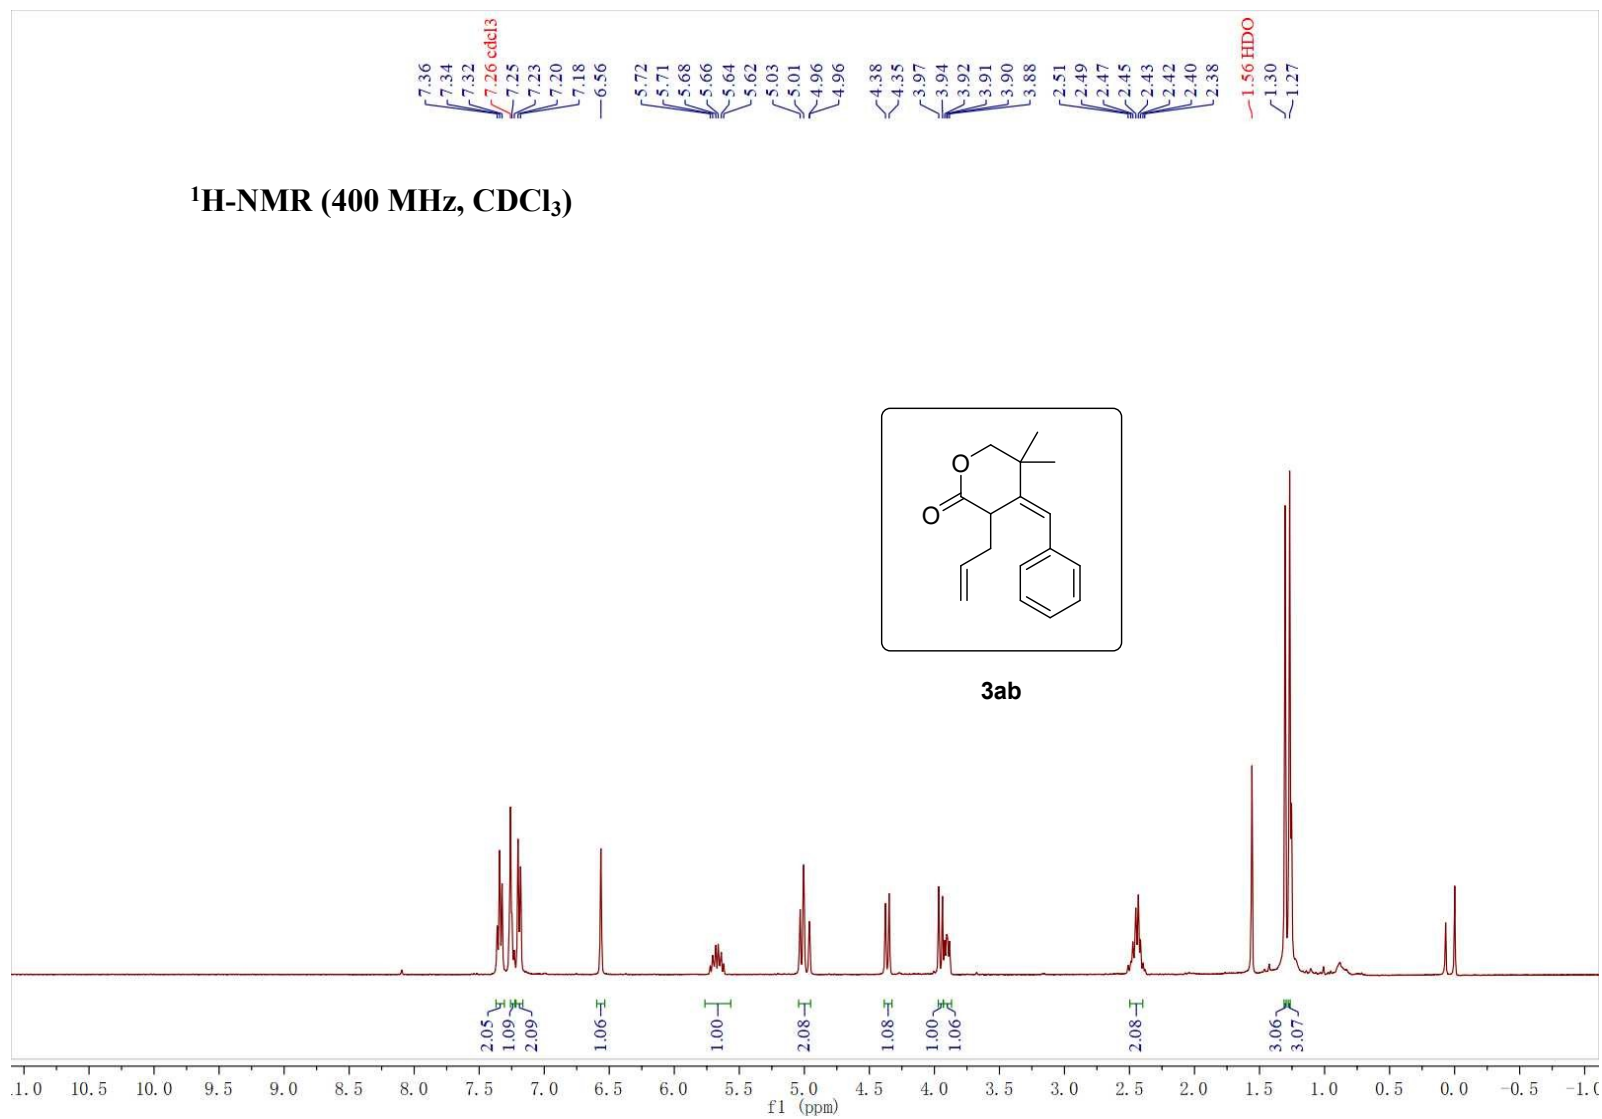

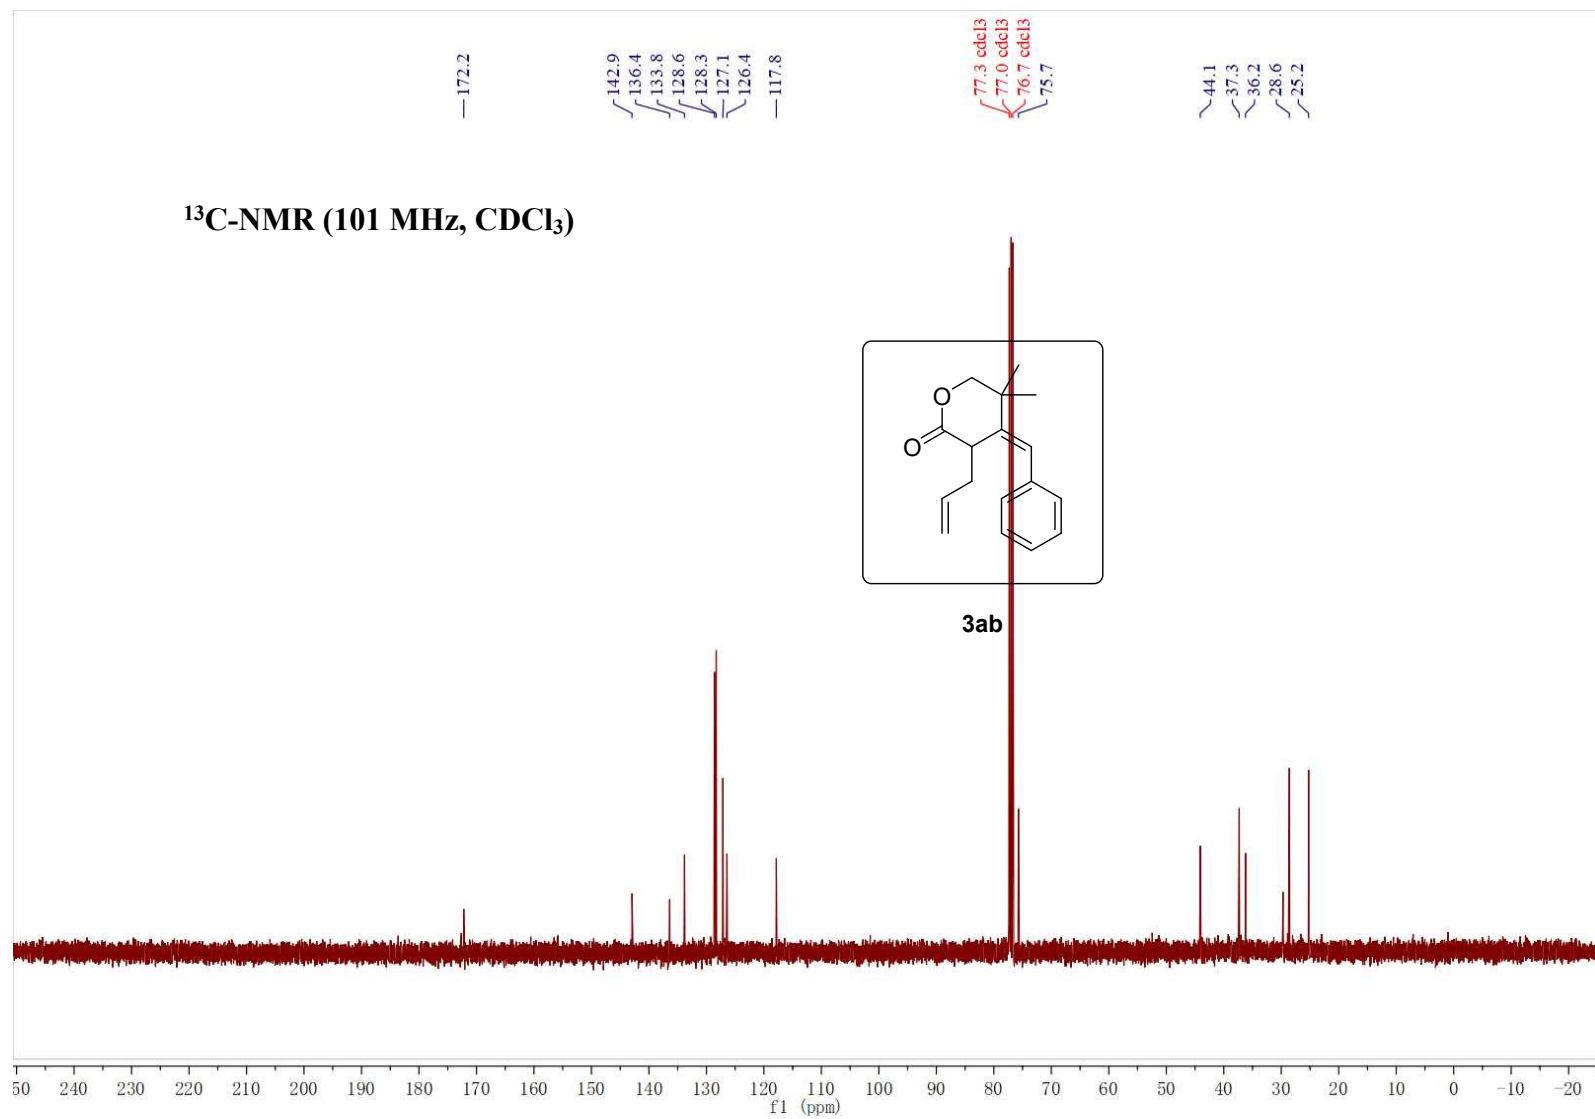

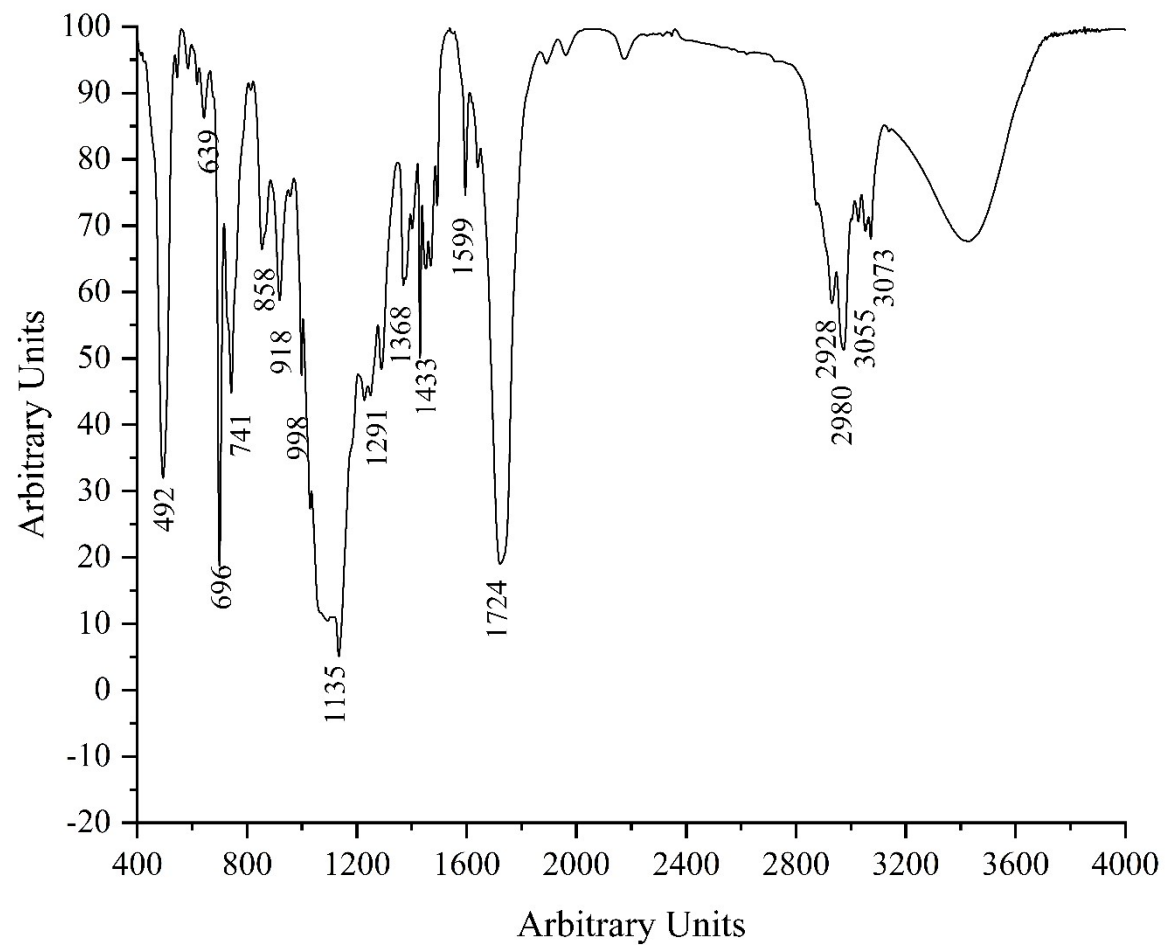

**<sup>1</sup>H-NMR (400 MHz, CDCl<sub>3</sub>)**

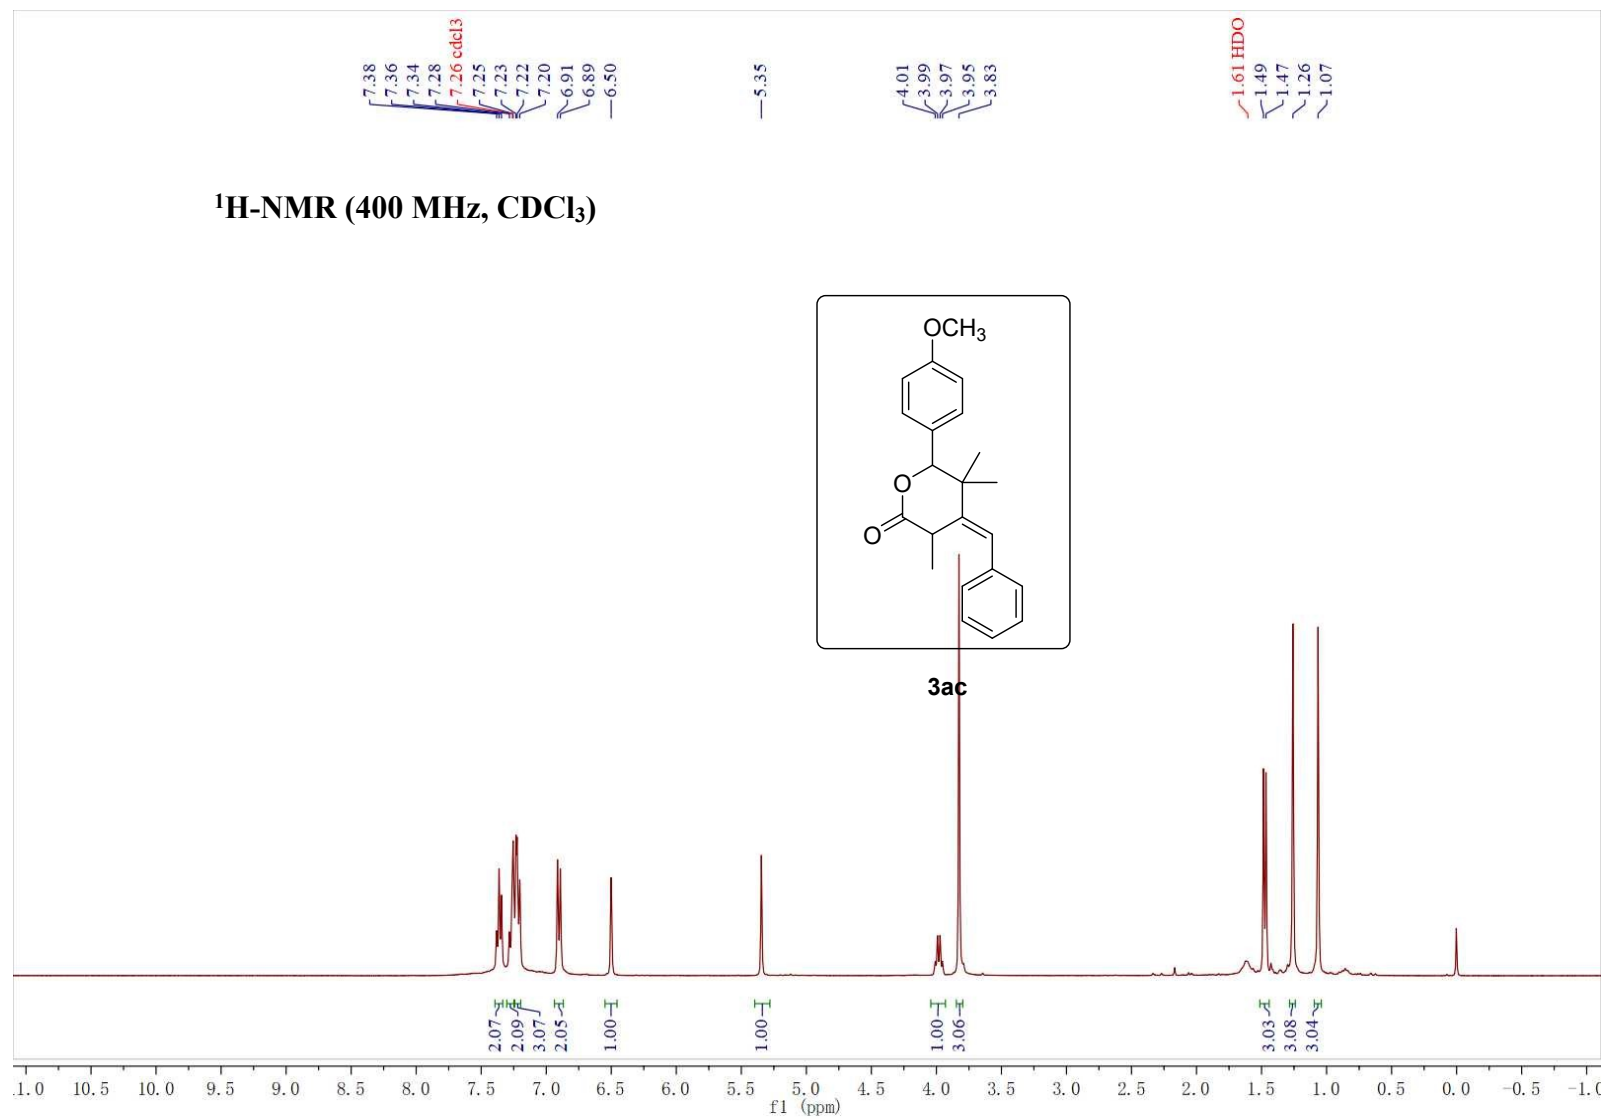

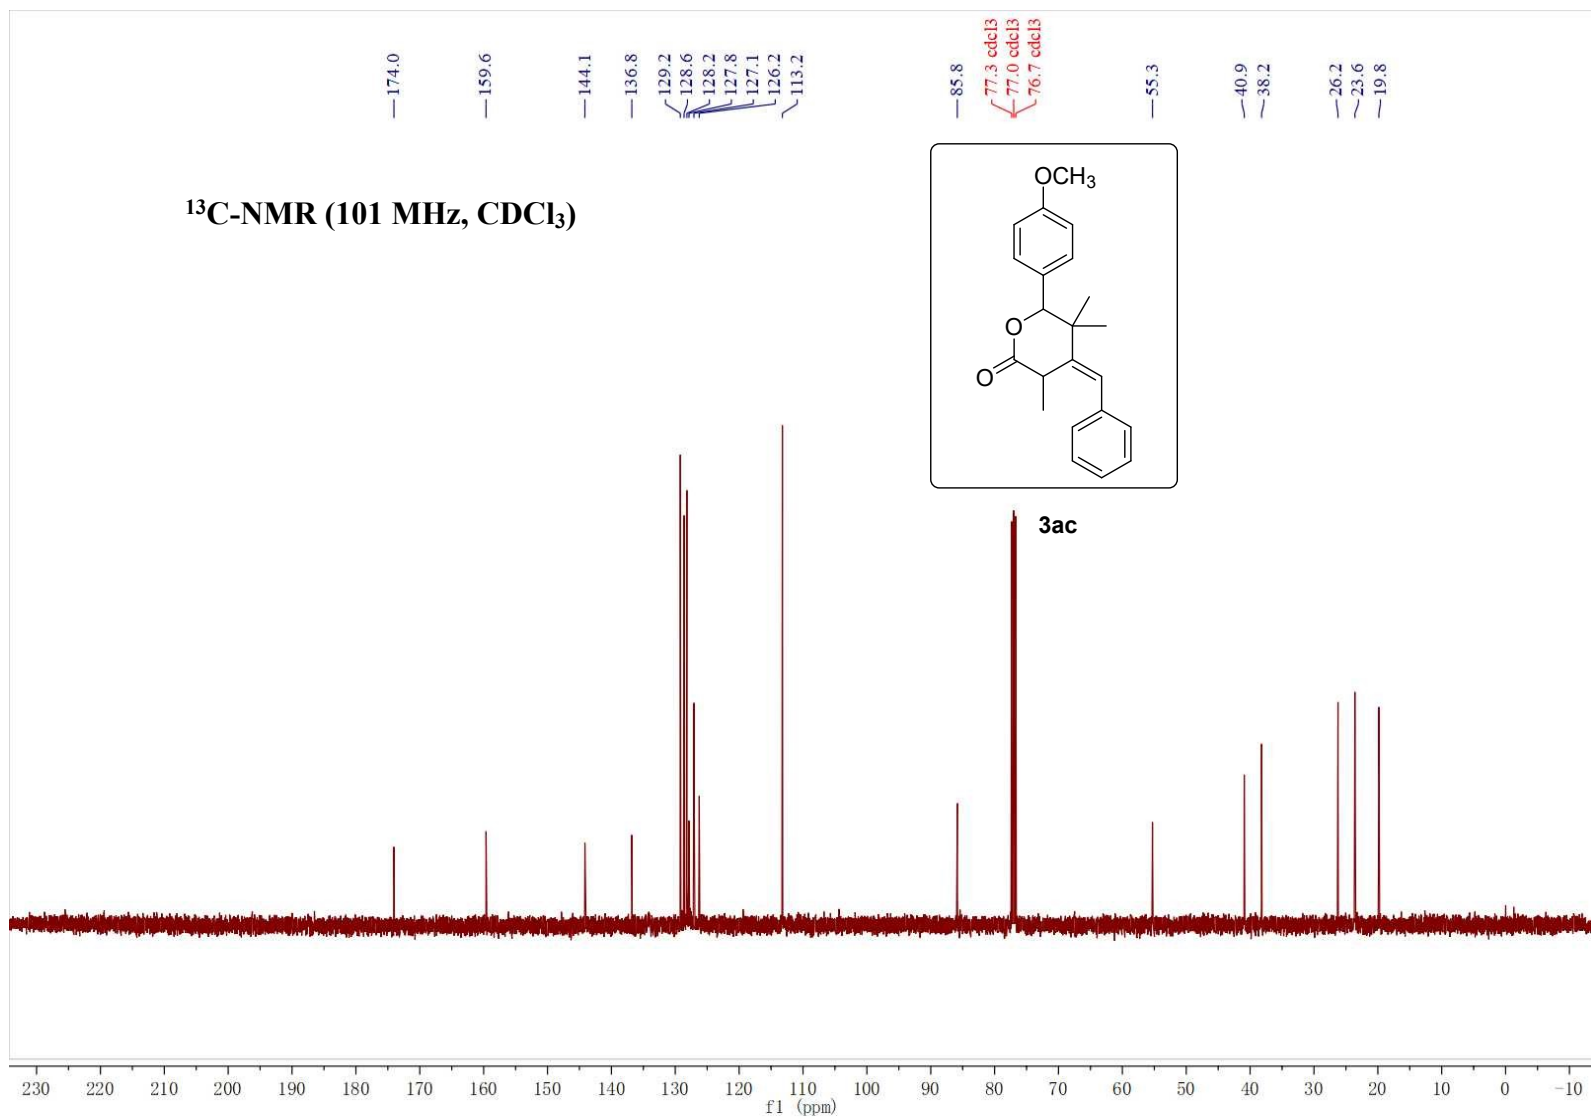

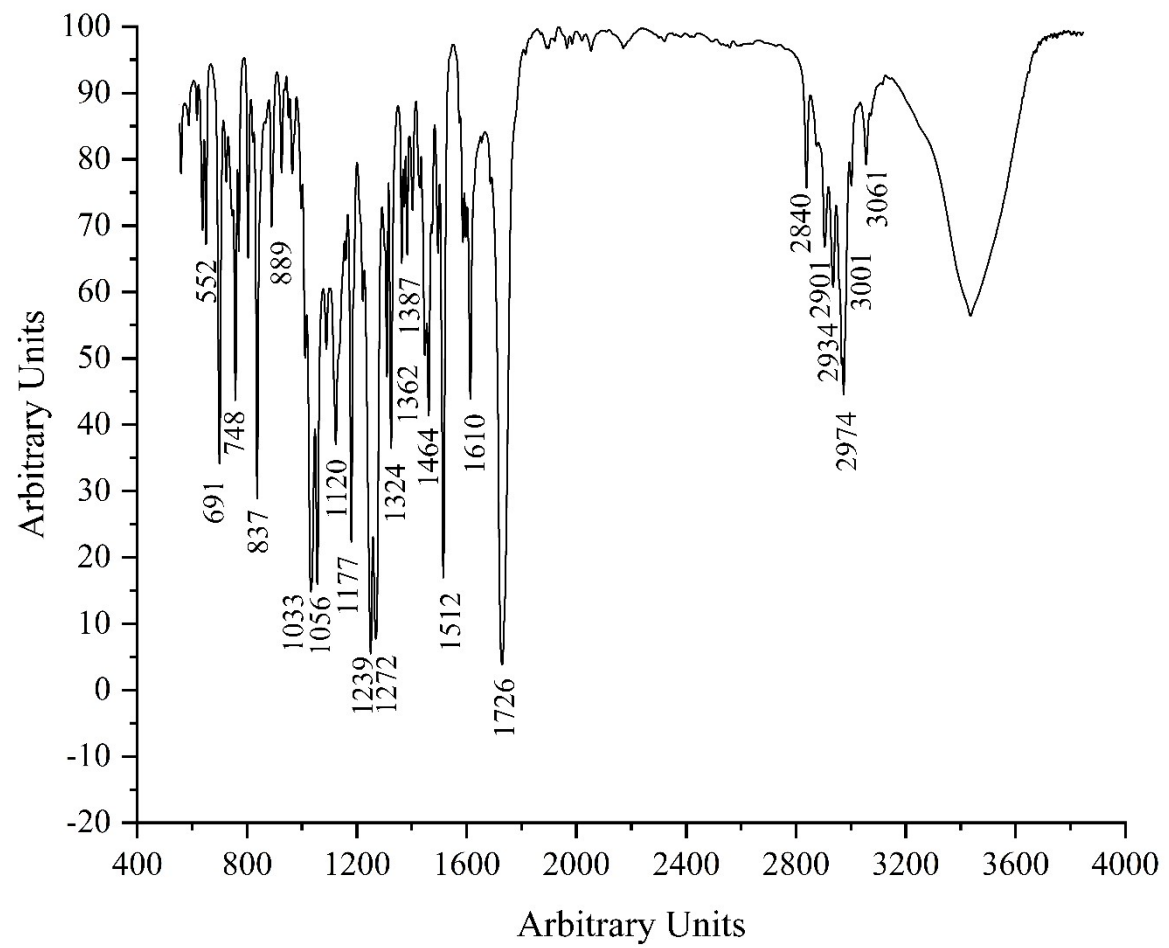



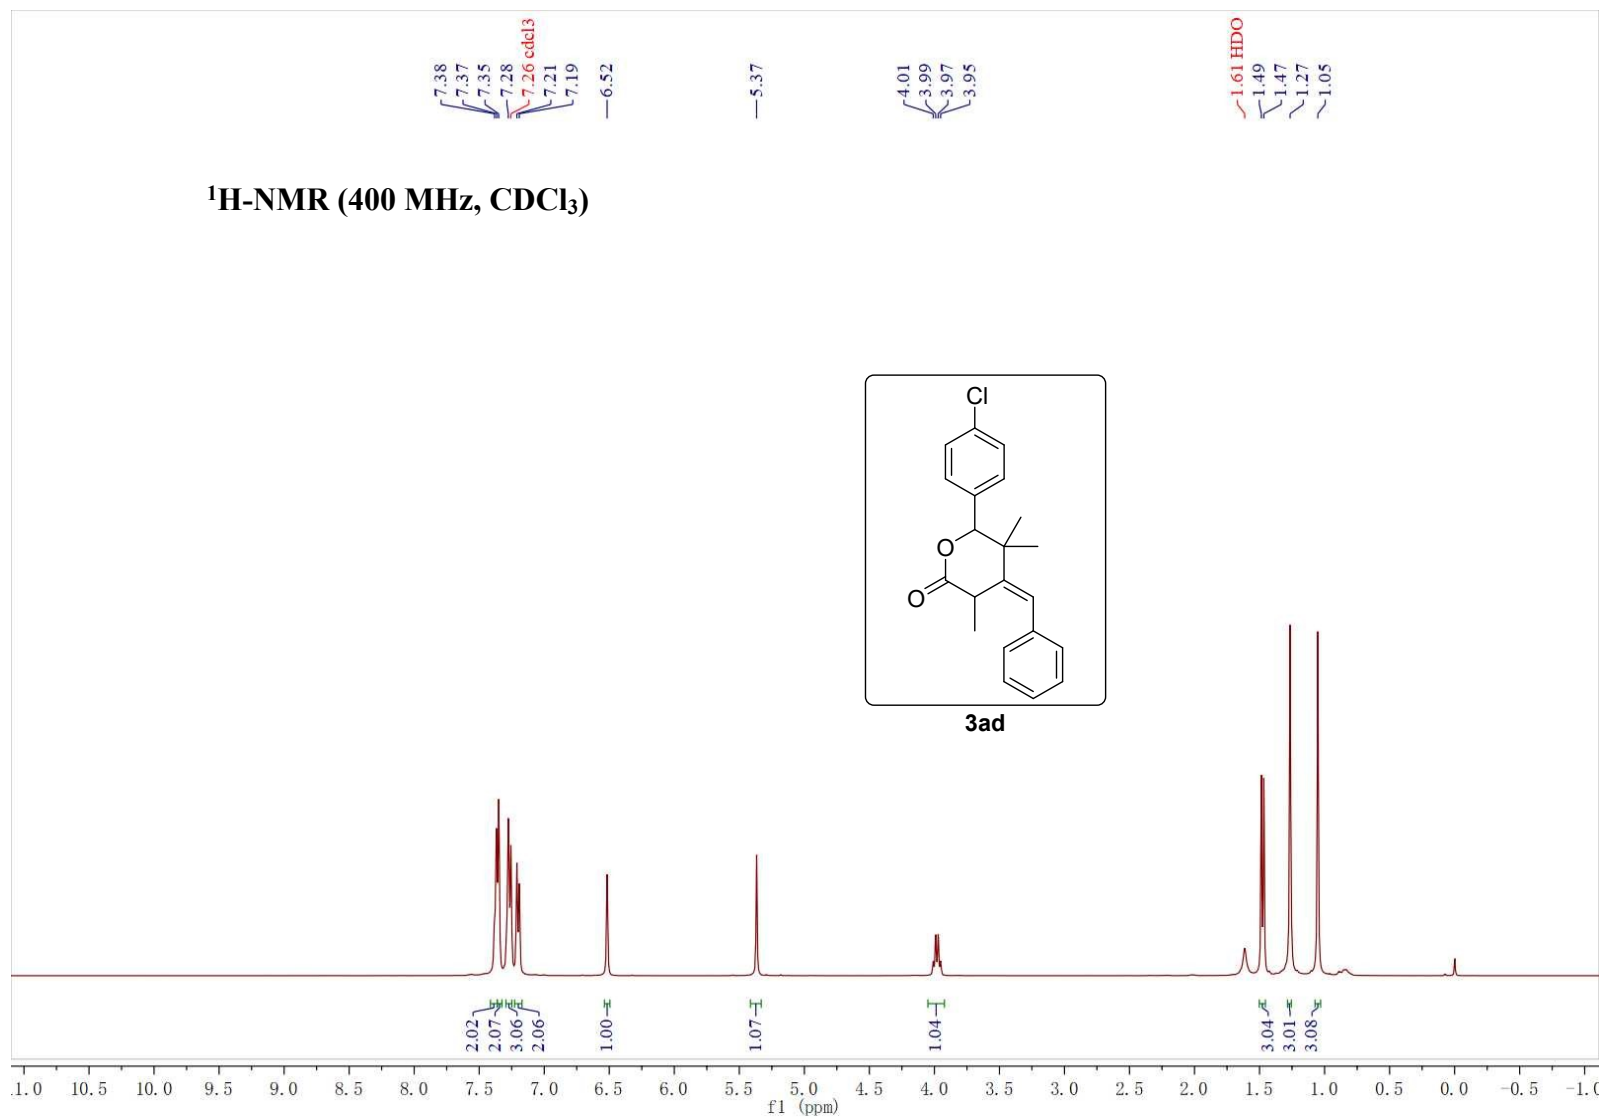

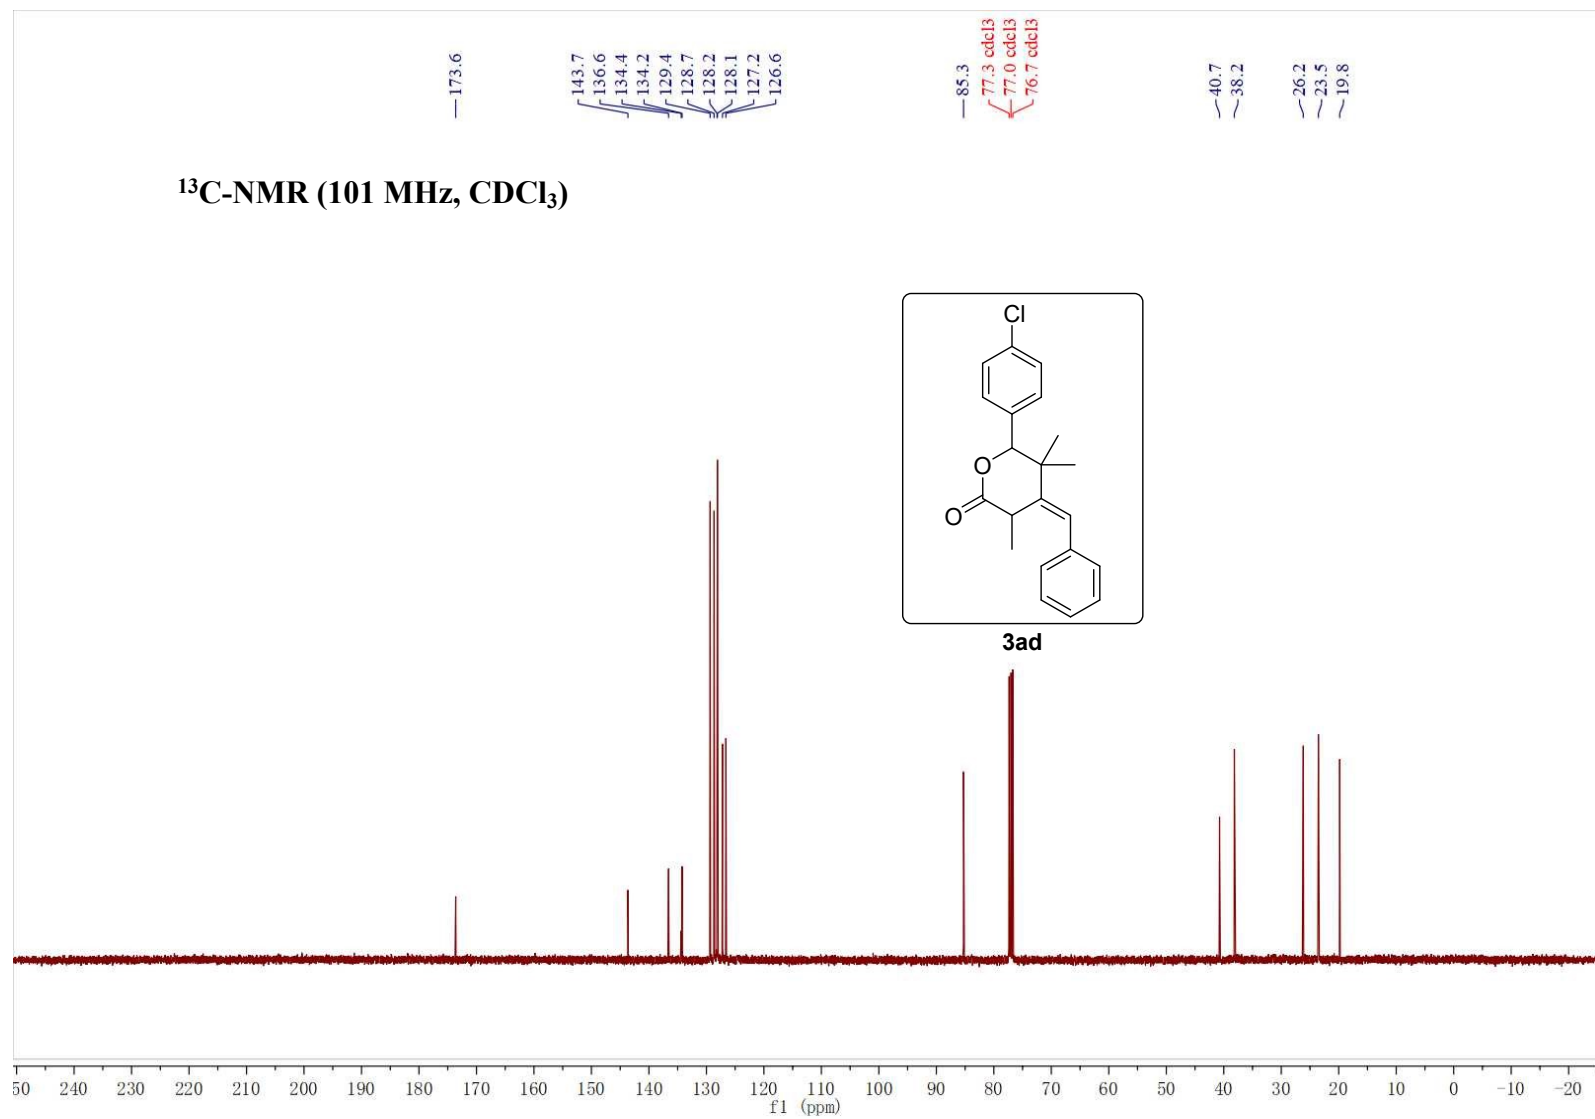

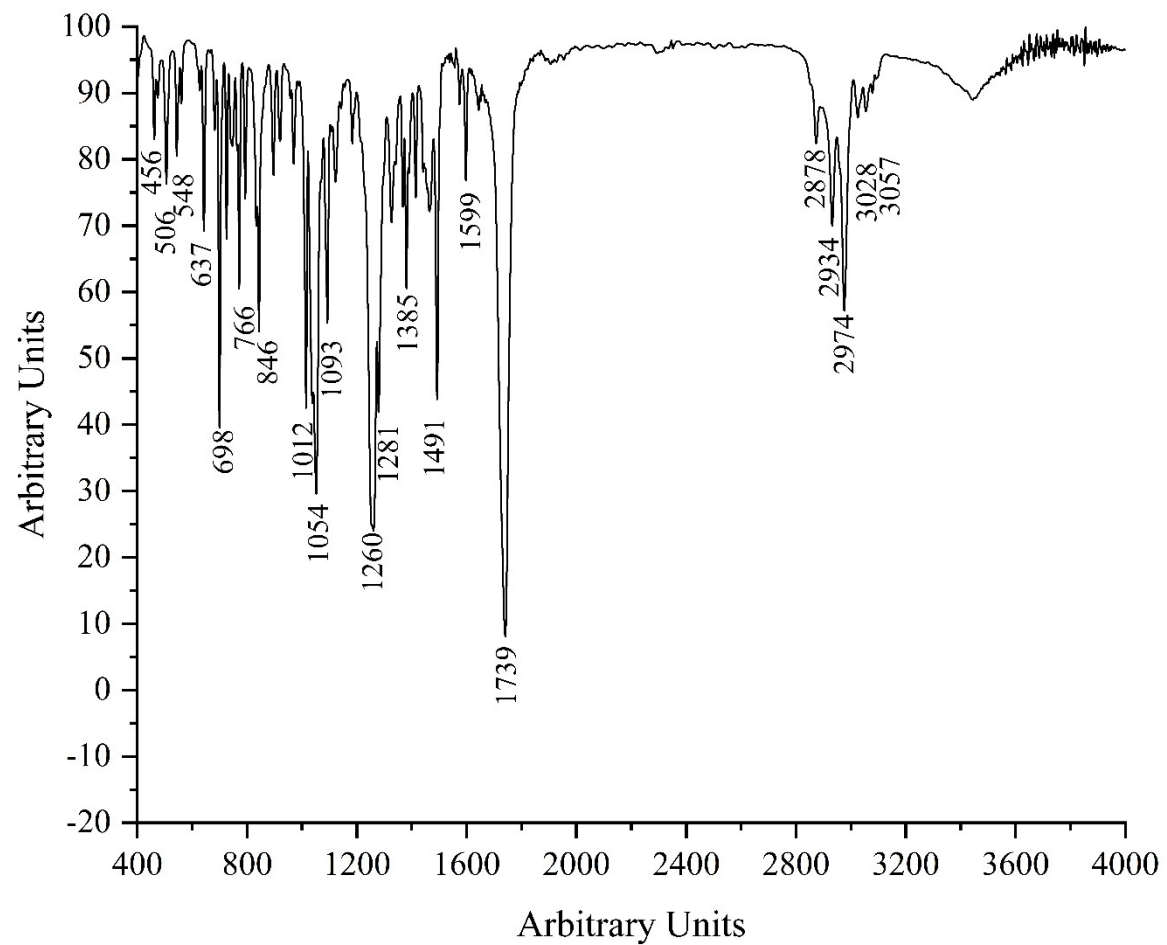

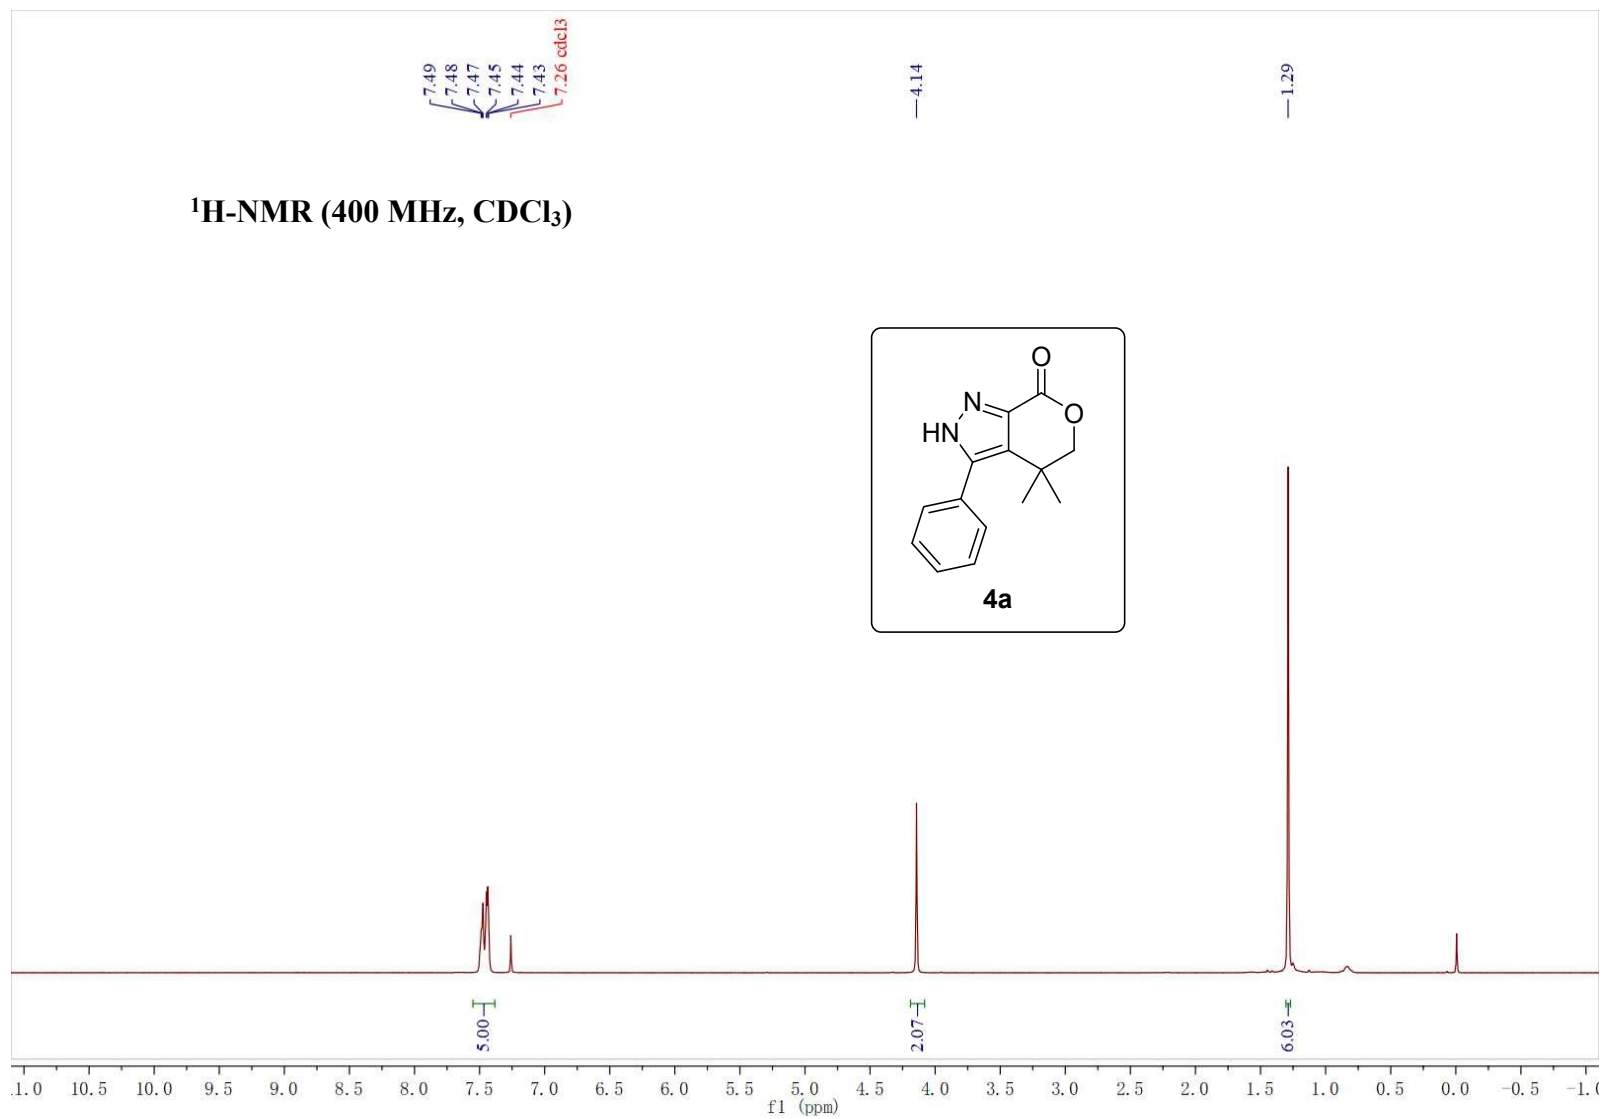

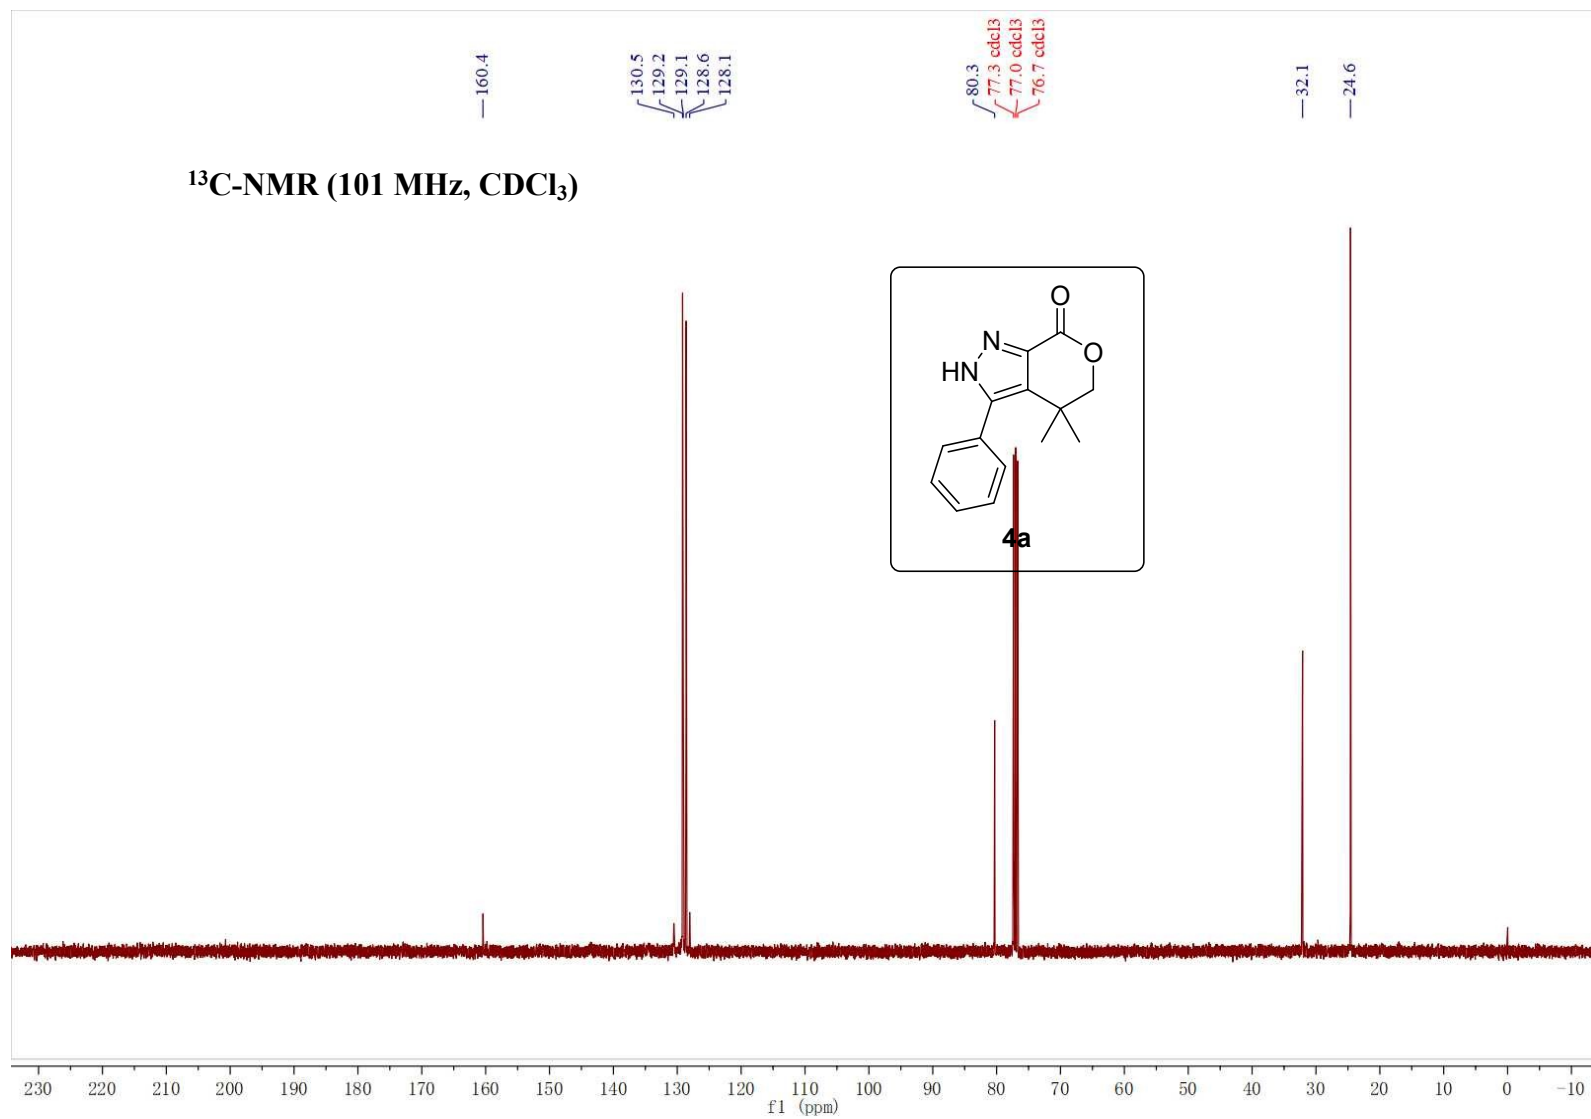

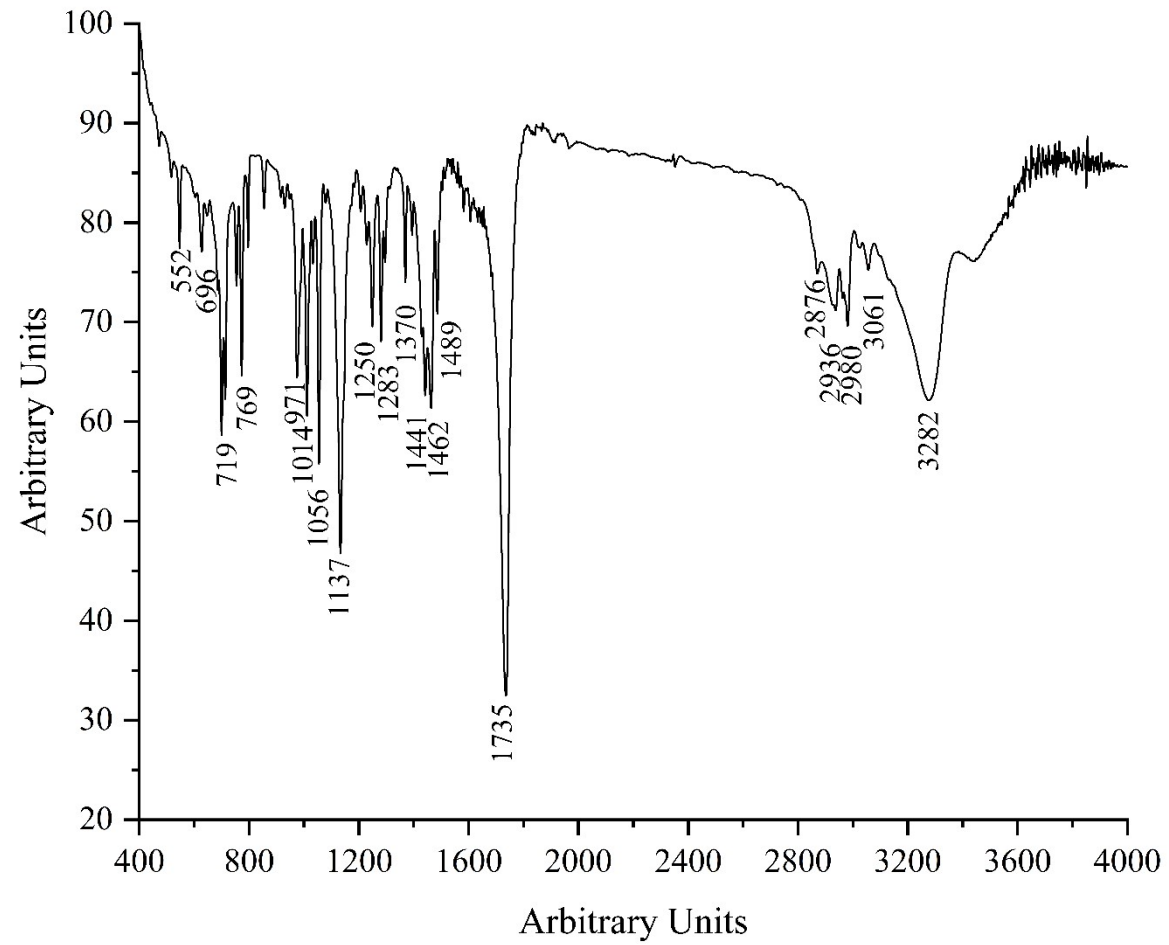

**<sup>1</sup>H-NMR (400 MHz, CDCl<sub>3</sub>)**

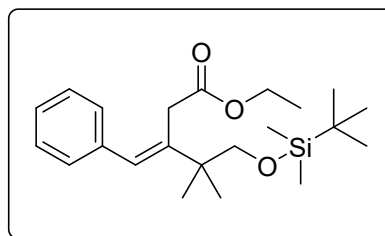

**5a**

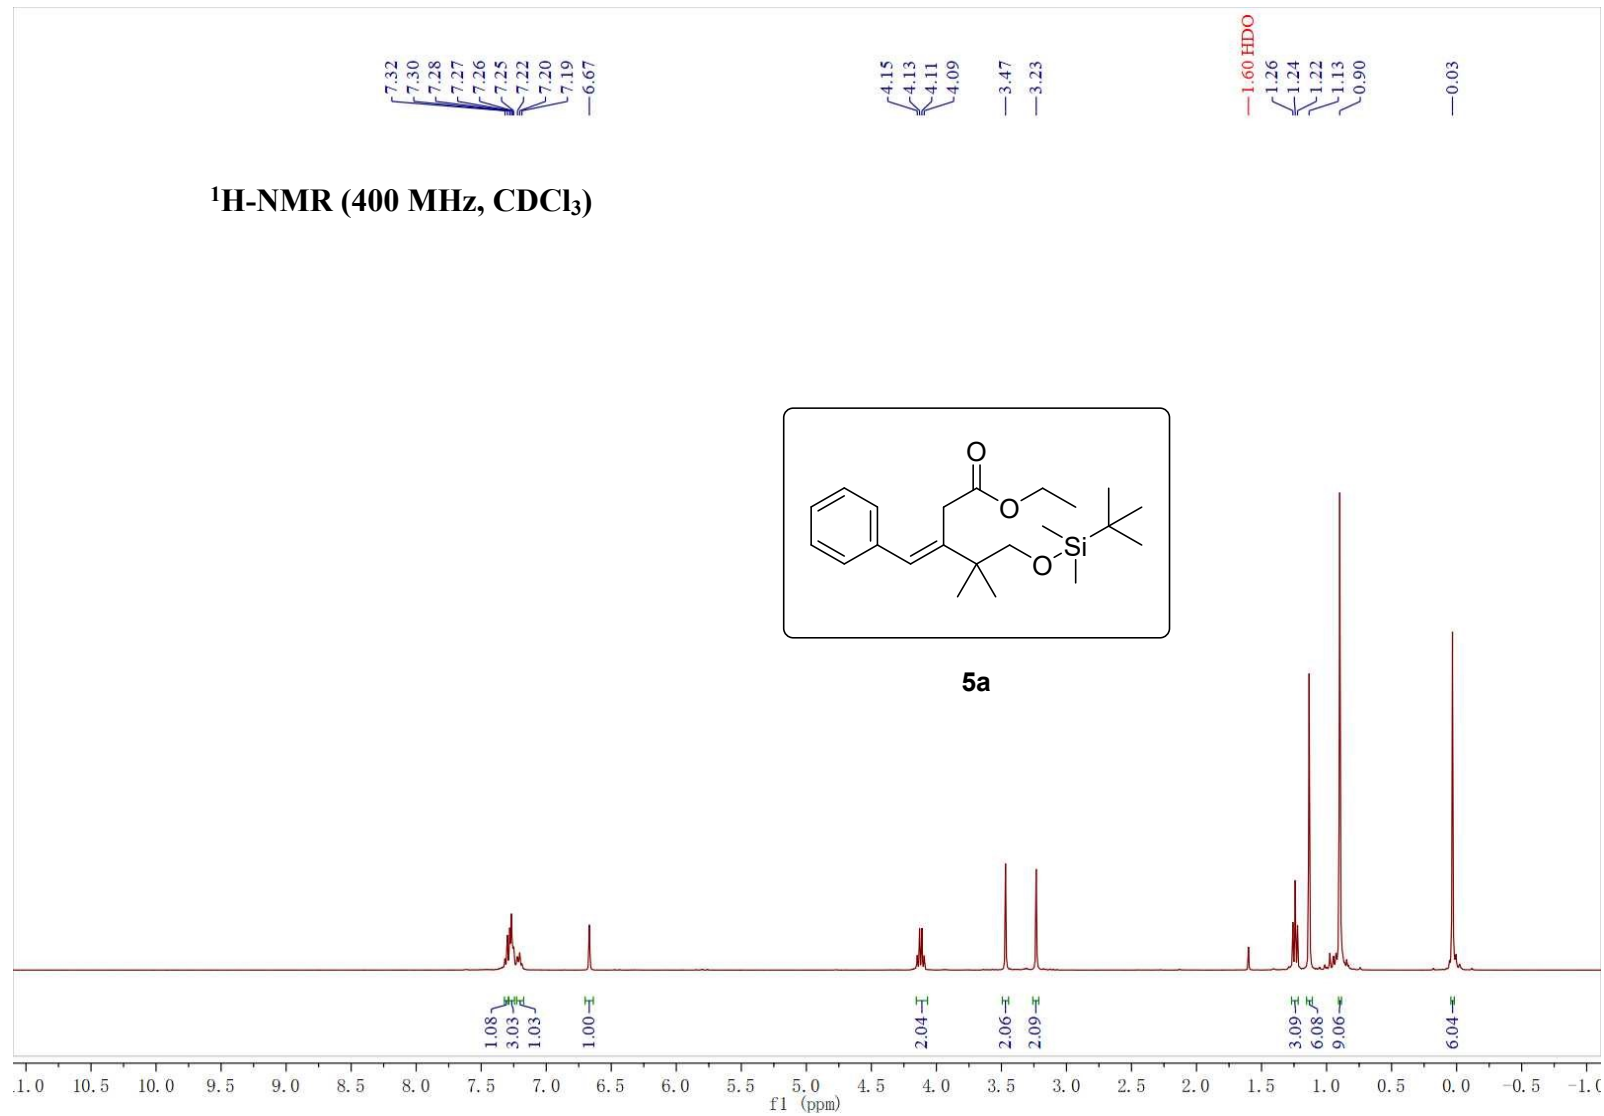

$^{13}\text{C}$ -NMR (101 MHz,  $\text{CDCl}_3$ )

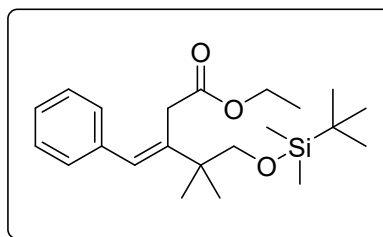

**5a**

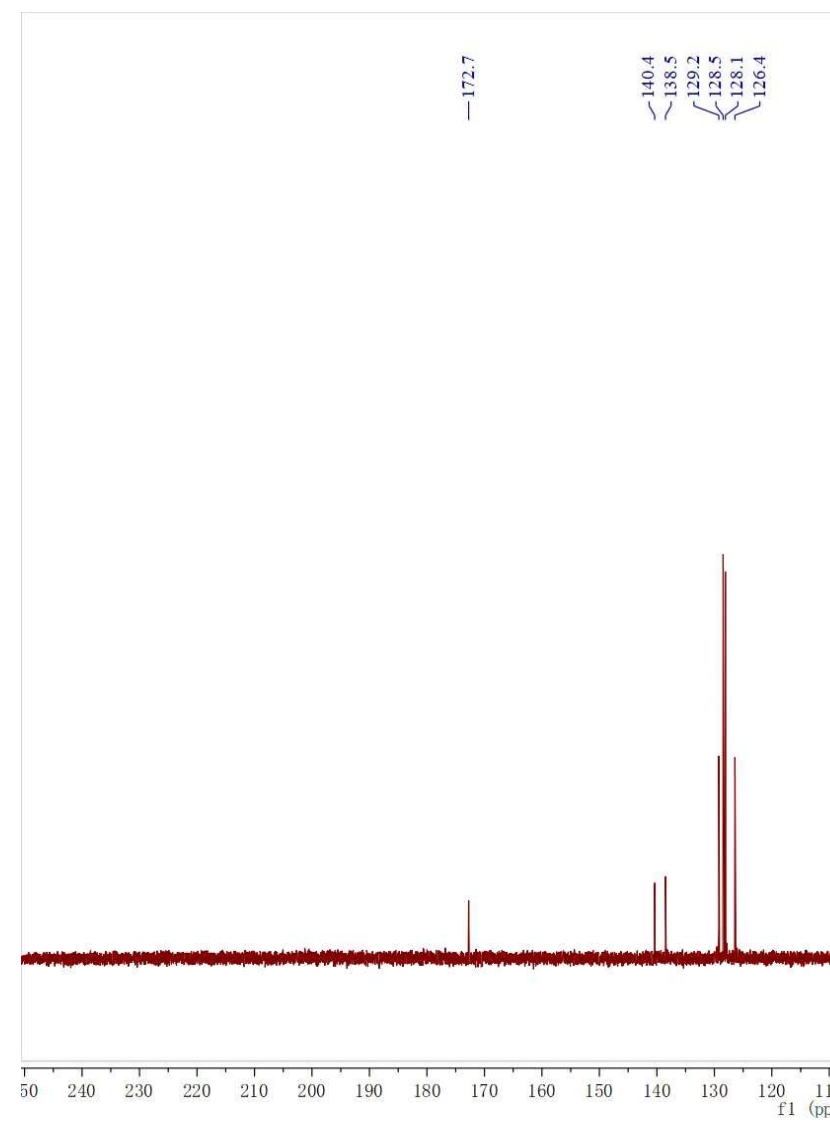



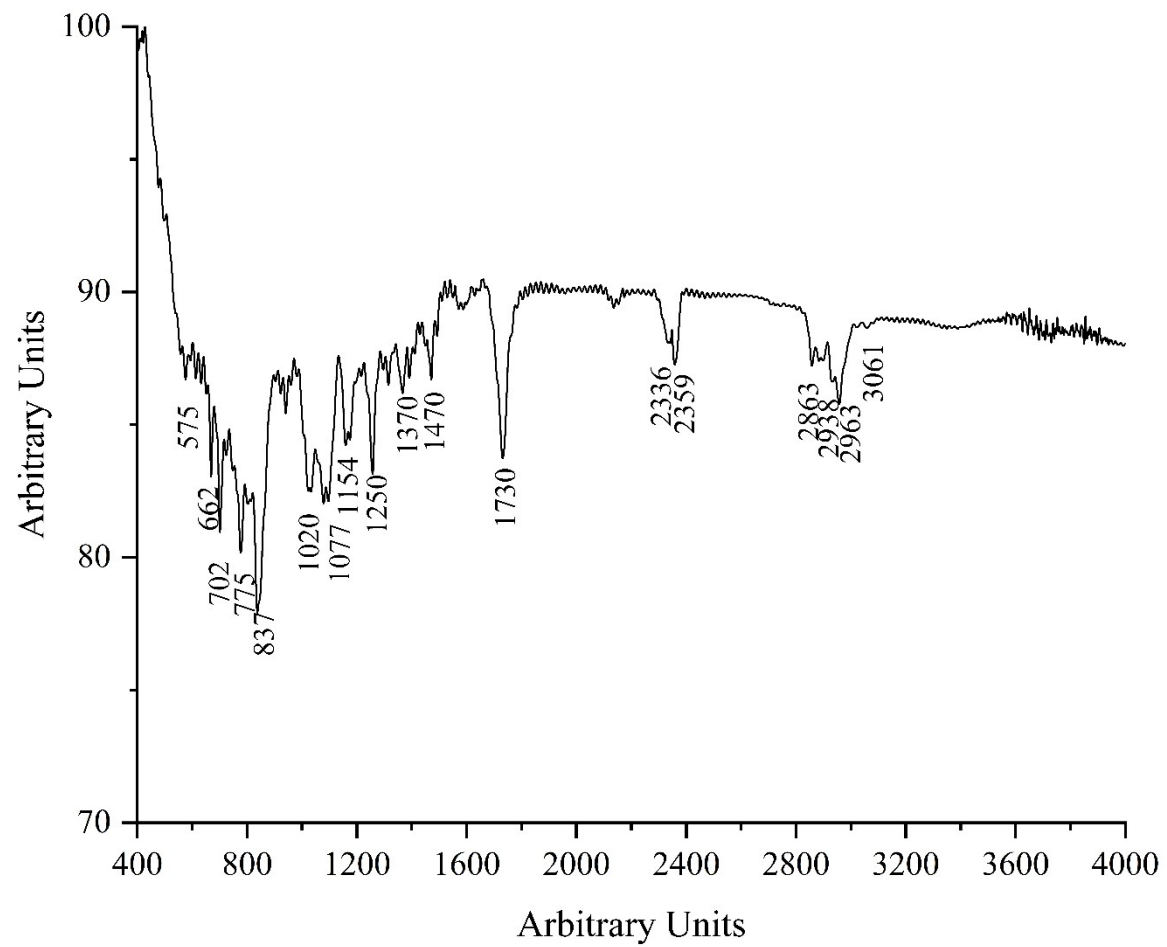

Supplement: d2qo02038f1.pdf [file d2qo02038f1.pdf]
